# Supplementary material
Source: publisher site journal article supplement (https://www.dovepress.com/article/320645)

Table S1 Information of isolates.

| General information |                                  | Antibiotic susceptibility (mg/L) |          |           |             |          |             |                        |                         |          |               |              | MLST-oxford typing |      |      |      |      |       |      | Genomic characteristics |       |                             |           |                |                              |                  |                |                          |
|---------------------|----------------------------------|----------------------------------|----------|-----------|-------------|----------|-------------|------------------------|-------------------------|----------|---------------|--------------|--------------------|------|------|------|------|-------|------|-------------------------|-------|-----------------------------|-----------|----------------|------------------------------|------------------|----------------|--------------------------|
| Isolate ID          | Specimen type                    | Sampling time                    | Imipenem | Meropenem | Cloxacillin | Cefepime | Ceftazidime | Cefoperazone-sulbactam | Piperacillin-tazobactam | Amikacin | Ciprofloxacin | Levofloxacin | Minocycline        | MLST | gltA | gtrB | gtdB | cpn60 | recA | gpi                     | rpoD  | Number of assembled contigs | Size (Mb) | GC content (%) | Nucleotide composition (CDS) | SR A_bio project | SRA bio sample | GenBank accession number |
|                     |                                  |                                  |          |           |             |          |             |                        |                         |          |               |              |                    |      |      |      |      |       |      |                         |       |                             |           |                |                              |                  |                |                          |
| A1                  | Sputum suction with bronchoscope | 2018/4/23                        | >32      | >32       | 1           | 256      | 128         | 64                     | >256                    | >256     | >64           | 64           | 16                 | 2211 | 123  | 33   | 22   | 22    | 97   | 3                       | 1     | 40376                       | 3         | 80             | 92                           | PRJNA640471      | SA MN 15778733 | CP06 0732                |
| A2                  | Sputum suction with bronchoscope | 2018/4/28                        | >32      | >32       | 1           | 256      | 128         | 64                     | >256                    | >256     | >64           | 128          | 16                 | 2211 | 123  | 33   | 22   | 22    | 97   | 3                       | 19903 | 4                           | 39        | 73             | 63                           | PRJNA640471      | SA MN 15778734 | JAC KXF0 0000 0000       |
| A3                  | Sputum suction with bronchoscope | 2018/4/30                        | >32      | 32        | 2           | 128      | 128         | 64                     | >256                    | >256     | >64           | 64           | 16                 | 2211 | 123  | 33   | 22   | 22    | 97   | 3                       | 19103 | 4                           | 39        | 74             | 61                           | PRJNA640471      | SA MN 15778735 | JAC KXG 0000 0000 0      |

|    |                                               |                       |         |         |         |          |          |     |          |          |         |    |    |                  |                  |        |        |             |             |         |                                  |                            |                  |                         |                              |                                 |                                 |
|----|-----------------------------------------------|-----------------------|---------|---------|---------|----------|----------|-----|----------|----------|---------|----|----|------------------|------------------|--------|--------|-------------|-------------|---------|----------------------------------|----------------------------|------------------|-------------------------|------------------------------|---------------------------------|---------------------------------|
| A1 | Blood                                         | 20<br>18<br>/5/<br>22 | 16      | 16      | 2       | 64       | 12<br>8  | 32  | 25<br>6  | >2<br>56 | >6<br>4 | 32 | 16 | 2<br>2<br>1<br>1 | 1<br>2<br>3<br>2 | 3<br>3 | 2<br>2 | 2<br>9<br>7 | 3<br>3      | 16<br>6 | 0<br>2<br>6<br>4<br>2<br>3.<br>7 | 3<br>7<br>6<br>9<br>4<br>4 | 6<br>3<br>7<br>3 | PRJ<br>NA6<br>404<br>71 | SA<br>MN<br>157<br>787<br>36 | JAC<br>KXH<br>0000<br>0000<br>0 |                                 |
| C2 | Sputum<br>suction<br>with<br>bronchos<br>cope | 20<br>17<br>/7/<br>18 | >3<br>2 | >3<br>2 | 0.<br>5 | 25<br>6  | >6<br>4  | 64  | >2<br>56 | >2<br>56 | 64      | 16 | 32 | 4<br>6<br>9      | 1<br>1<br>2      | 3<br>3 | 2<br>2 | 2<br>0<br>3 | 1<br>0<br>3 | 13<br>1 | 7<br>6<br>7<br>4<br>2<br>3.<br>7 | 3<br>8.<br>9<br>4          | 5<br>5<br>2<br>9 | PRJ<br>NA6<br>404<br>71 | SA<br>MN<br>157<br>787<br>37 | JAC<br>KXI0<br>0000<br>0000     |                                 |
| C4 | Blood                                         | 20<br>17<br>/7/<br>21 | 32      | >3<br>2 | 0.<br>5 | 25<br>6  | >6<br>4  | 64  | >2<br>56 | >2<br>56 | 64      | 16 | 32 | 4<br>6<br>9      | 1<br>1<br>2      | 3<br>3 | 2<br>2 | 2<br>0<br>3 | 1<br>0<br>3 | 20<br>8 | 7<br>8<br>9<br>8<br>9            | 3<br>3<br>5<br>6           | 5<br>5<br>9      | PRJ<br>NA6<br>404<br>71 | SA<br>MN<br>157<br>787<br>38 | JAC<br>KXJ0<br>0000<br>0000     |                                 |
| C6 | Blood                                         | 20<br>17<br>/7/<br>25 | >3<br>2 | >3<br>2 | 0.<br>5 | 25<br>6  | >6<br>4  | 64  | >2<br>56 | >2<br>56 | 64      | 16 | 32 | 4<br>6<br>9      | 1<br>1<br>2      | 3<br>3 | 2<br>2 | 2<br>0<br>3 | 1<br>0<br>3 | 15<br>0 | 7<br>5<br>5<br>1                 | 3<br>8.<br>9<br>7          | 5<br>2<br>3      | 6<br>3                  | PRJ<br>NA6<br>404<br>71      | SA<br>MN<br>157<br>787<br>39    | JAC<br>KXK<br>0000<br>0000<br>0 |
| L6 | Sputum<br>suction<br>with<br>bronchos<br>cope | 20<br>15<br>/2/<br>25 | >3<br>2 | >3<br>2 | 1       | 12<br>8  | >2<br>56 | 128 | >2<br>56 | >2<br>56 | 64      | 8  | 8  | 1<br>9<br>5      | 1<br>3<br>3      | 3<br>3 | 2<br>2 | 2<br>9<br>6 | 3<br>3      | 74<br>0 | 3.<br>8<br>7<br>0<br>9           | 3<br>3<br>5<br>6           | 5<br>5<br>6      | PRJ<br>NA5<br>398<br>47 | SA<br>MN<br>115<br>136<br>59 | JAC<br>ATT0<br>0000<br>0000     |                                 |
| L7 | Sputum<br>suction<br>with                     | 20<br>15<br>/3/<br>3  | >3<br>2 | >3<br>2 | 1       | >2<br>56 | >2<br>56 | 256 | >2<br>56 | >2<br>56 | 64      | 8  | 8  | 1<br>9<br>5      | 1<br>3<br>3      | 3<br>3 | 2<br>2 | 2<br>9<br>6 | 3<br>3      | 77<br>1 | 3.<br>8<br>7<br>1                | 3<br>8.<br>9<br>0          | 5<br>6<br>7<br>7 | 6<br>398<br>47          | SA<br>MN<br>115              | JAC<br>ATS0<br>0000<br>0000     |                                 |

|    |          |     |    |    |   |    |    |     |    |    |    |   |   |   |   |   |   |   |   |    |    |    |   |   |  |     |     |  |  |  |  |  |  |  |  |    |     |      |     |      |     |      |
|----|----------|-----|----|----|---|----|----|-----|----|----|----|---|---|---|---|---|---|---|---|----|----|----|---|---|--|-----|-----|--|--|--|--|--|--|--|--|----|-----|------|-----|------|-----|------|
|    | bronchos |     |    |    |   |    |    |     |    |    |    |   |   |   |   |   |   |   |   |    | 0  |    |   |   |  |     |     |  |  |  |  |  |  |  |  |    | 136 |      |     |      |     |      |
|    | cope     |     |    |    |   |    |    |     |    |    |    |   |   |   |   |   |   |   |   |    | 4  |    |   |   |  |     |     |  |  |  |  |  |  |  |  | 60 |     |      |     |      |     |      |
|    | Sputum   | 20  |    |    |   |    |    |     |    |    |    |   |   |   |   |   |   |   |   |    | 3. |    |   |   |  |     |     |  |  |  |  |  |  |  |  |    |     | SA   | JAC |      |     |      |
|    | suction  | 15  | >3 | 32 | 1 | 12 | >2 | >25 | >2 | >2 | 64 | 8 | 8 | 1 |   |   |   |   |   |    | 8  | 3  | 3 |   |  | PRJ |     |  |  |  |  |  |  |  |  |    | MN  | ATR  |     |      |     |      |
| L8 | with     | /3/ | 2  |    |   | 8  | 56 | 6   | 56 | 56 |    |   |   | 9 | 1 | 3 | 3 | 2 | 2 | 9  | 7  | 8. | 5 | 6 |  | NA5 |     |  |  |  |  |  |  |  |  |    | 115 | 0000 |     |      |     |      |
|    | bronchos | 11  |    |    |   |    |    |     |    |    |    |   |   | 5 |   |   |   |   |   | 6  | 0  | 9  | 5 |   |  | 47  |     |  |  |  |  |  |  |  |  |    | 136 | 0000 |     |      |     |      |
|    | cope     |     |    |    |   |    |    |     |    |    |    |   |   |   |   |   |   |   |   | 6  |    |    |   |   |  |     |     |  |  |  |  |  |  |  |  |    | 61  | 0    |     |      |     |      |
|    |          |     |    |    |   |    |    |     |    |    |    |   |   |   |   |   |   |   |   | 3. |    |    |   |   |  |     |     |  |  |  |  |  |  |  |  |    |     |      |     |      |     |      |
|    |          | 20  |    |    |   |    |    |     |    |    |    |   |   | 1 |   |   |   |   |   |    | 8  |    | 3 | 3 |  |     | PRJ |  |  |  |  |  |  |  |  |    |     | SA   | JAC |      |     |      |
| L9 | Blood    | 15  | >3 | 32 | 1 | 12 | >2 | 128 | >2 | >2 | 64 | 8 | 8 | 9 | 1 | 3 | 3 | 2 | 2 | 9  | 6  | 8. | 5 | 7 |  | NA5 |     |  |  |  |  |  |  |  |  |    |     |      | 115 | 0000 |     |      |
|    |          | /3/ | 2  |    |   | 8  | 56 |     | 56 | 56 |    |   |   | 5 |   |   |   |   |   | 6  | 9  | 8. | 8 | 0 |  | 398 |     |  |  |  |  |  |  |  |  |    |     |      | 136 | 0000 |     |      |
|    |          | 17  |    |    |   |    |    |     |    |    |    |   |   |   |   |   |   |   |   | 4  |    | 9  | 5 |   |  | 47  |     |  |  |  |  |  |  |  |  |    |     |      | 62  | 0    |     |      |
|    |          |     |    |    |   |    |    |     |    |    |    |   |   |   |   |   |   |   |   | 8  |    |    |   |   |  |     |     |  |  |  |  |  |  |  |  |    |     |      |     |      |     |      |
|    |          |     |    |    |   |    |    |     |    |    |    |   |   |   |   |   |   |   |   | 3. |    |    |   |   |  |     |     |  |  |  |  |  |  |  |  |    |     |      |     |      |     |      |
| L1 | Blood    | 20  | >3 | 32 | 1 | 12 | >2 | 128 | >2 | >2 | 64 | 8 | 8 | 9 | 1 | 3 | 3 | 2 | 2 | 9  | 7  | 8. | 5 | 6 |  | PRJ |     |  |  |  |  |  |  |  |  |    |     |      |     | SA   | JAC |      |
| 0  |          | /3/ | 2  |    |   | 8  | 56 |     | 56 | 56 |    |   |   | 5 |   |   |   |   |   | 6  | 0  | 8. | 6 | 8 |  | NA5 |     |  |  |  |  |  |  |  |  |    |     |      |     |      | 115 | ATP0 |
|    |          | 17  |    |    |   |    |    |     |    |    |    |   |   |   |   |   |   |   |   | 6  |    | 9  | 5 |   |  | 47  |     |  |  |  |  |  |  |  |  |    |     |      |     |      | 136 | 0000 |
|    |          |     |    |    |   |    |    |     |    |    |    |   |   |   |   |   |   |   |   | 6  |    |    |   |   |  |     |     |  |  |  |  |  |  |  |  |    |     |      |     |      | 63  | 0000 |



GGAAACCTGATCCAGC  
CCTTGTTGAGGCGTTTT  
TAAAAGAATATCCCGAA  
GCGCGTAAGTCTATTG  
AGCAAAAGGCCAAGAT  
GCCATTAAGTGGTAGTT  
TCAGCGGTGCAGAATT  
TTATGTCGTAAATGCCT  
TTATATTGCGGGCAGC  
CAATGGACAAGAACAG  
CCAGTCCGTTGGTCTAT  
GCGTCCTCATTCAAAT  
TTATTAGTCTGACGAAA  
GAACAACGTGATCAAG  
CTGATCATGATTTCTTA  
TTTAAAGACATCAAAAA  
ACGTTTGGCTGAAGGG  
CCGCTCTATTGGGACTT  
AGTATTGCAACTTGCCG  
AGCCAGGAGACCCAGT  
GAATGACCCATCTCAG  
CCTTGGCCAAAAGACC  
GTAAAGAAGTTATAGCC  
GGAACATTAGAAGTCAA  
AAATGTAAGTATGATCAGG  
TAAATGGCGCTTGTCTG  
GATATTAAGTTTACCC  
AACTTTGGTGCCACCC  
GGAATTGAGTTATCAGA  
TGACCCAGTACTCGCA  
GCACGAGCGGCGATCT  
ATTCACAGTCTTATAAT  
GCTCGATTACGTGAAAT

A1

2159  
603

T

TTA  
A

disruptiv  
e\_infra  
me\_inse  
rtion

A1.peg  
.2105

360\_362 dup  
TAA

Phe120\_Lys1  
21 ins Asn

TGGATTTGGCAAAGCA  
ACGGATGCCGTGGGCA  
AATAG  
ATGATAAAAAATAAATA  
TATTCACATCCGAAGCA  
TTGATTCTCGCCTTGCA  
GCACGATCGAGCAGTG  
CTCGATTA ACTCGCGC  
CTCAGGATTTACTTTGG  
TTGAATTGTTAGTCGCG  
ATCGCTATCTTTGCGGT  
TTTATCTTTATTGGGGT  
GGAAAATTTTCGATTAC  
TTGCTCAAAGTTCGTGA  
TCGTAATGCCGAACAT  
GAAGTGCATTTATTTGA  
ATTACAAGATGCTTATC  
AACAAATTCCTTCGTGAT  
ACTTTGCAGATTATCCC  
TTTATCCGCAAACCAAG  
GTGGTCAACTTCATCCA  
GCTTTAGAAATCGATAA  
TCAAATTTTACGTTTTA  
GCAAAGCAGGCGTAAC  
GGATCCTTTAAAACAAG  
GCTTATCACCATTTGAA  
CGAATTGAATATCGTTA  
TGATGCAGACCAAAAAA  
AATTATATCGTCTTAAA  
TATACAAATTTGAATAC  
TTCGAACAGAGAGCAA  
CCTTTATCGAGTACTTT  
GTTAAGTCAAGTCGAC

MIKNKYIHIRSIDSRLAAR  
SSSARLTRASGFTLVELL  
VAIAIFAVLSLLGWKIFDY  
LLKVRDRNAEHEVHLFE  
LQDAYQQILRDTLQIPLS  
ANQGGQLHPALEIDNQIL  
RFSKAGVTDPLKQGLSP  
FERIEYRYDADQKLYRL  
KYTNLNTSNREQPLSST  
LLSQVDQYQIMVLTPQE  
VTKWPEVNIDPTKPNEL  
KKLPKGIKIQLTVAGVNY  
EWIYSLNQGDLSLSQEG  
NS

0 0 0 1 / / / / / / / /

NODE  
\_1\_len  
gth\_26  
8445\_  
cov\_1  
6.2871  
09

5301  
7

G

GCG  
TGG  
ACG  
ATC  
TGA  
GTT  
GAA  
CTC  
GCG  
ACG  
CGG  
ACG  
ATC  
TTC  
ACC  
ACC  
GAA  
GCT  
ACG  
TTTT  
GGA

conserv  
ative\_inf  
rame\_in  
sertion

C1.pe  
g.1222

1375\_1376  
ins  
TCGTGAAG  
GTGGTTTT  
GAAGACCG  
TCCACGTC  
GTAGCTTC  
GGTGGTGA  
AGATCGTC  
CACGTCGC  
GAGTTCAA  
CTCAGACC  
GTCCACGT  
CGTGAAGG  
TGGTTTTG  
AAGACCGT  
CCAAAACG  
TAGCTTCG  
GTGGTGAA  
GATCGTCC  
GCGTCGCG

His458\_Ala45  
9 ins  
ValValLysVal  
ValLeuLysThr  
ValHisValVal  
AlaSerValVal  
LysIleValHisV  
alAlaSerSerT  
hrGlnThrValHi  
sValValLysVal  
ValLeuLysThr  
ValGlnAsnVal  
AlaSerValVal  
LysIleValArgV  
alAlaSerSerT  
hrGlnIleValHis

CAATATCAGATTATGGT  
TTTGACTIONCGCAAGAA  
GTCACAAAATGGCCCG  
AGGTTAATATTGATCCA  
ACGAAACCTAATGAGTT  
AAAAAAATTACCGAAAG  
GGATAAAAATCCAACCTT  
ACAGTCGCTGGTGTA  
ATTATGAGTGGATTTAT  
AGCTTAAATCAGGGTG  
ACTTATCGCTTTTCGCAG  
GAAGGTAATTCATAA  
ATGAGCAAACTTTTGC  
CGAATTTTCTTTGCACG  
AAACCTTACAACAAGCT  
CTTGAAGGTTTAGGTTT  
TACTAACCCAACTCCTG  
TGCAAGAACAATCTATT  
CCTGCTGCTTTAGAAG  
GTAAAGACCTTCTTGTT  
TCTAGCCAGACTGGTT  
CTGGTAAAACCTGCTGC  
ATTCTTATTACCGACAT  
TACATAATTTGGCAGGT  
CAAGATACTTTTCGTTCC  
GTTCAAAGAACGTATGA  
AAGCAGTGACTCAGCC  
TAGCATTTTAGTTTTAT  
GCCCAACACGTGAATT  
GGCTCAACAAGTTAGC  
CAAGACGCAATTGCTTT  
TGTACGTACATGAAAG  
GTGTTTCGTATTGCTGCA

MSKTFAEFSLHETLQQA  
LEGLGFTNPTPVQEQSIP  
AALEGKDLLVSSQTGSG  
KTA AFL LPTLHNL AGQDT  
FVPFKERMKA V TQPSILV  
LCPTRELAQQVSQDAIA  
FVRHMKGVRIAAIMGGM  
PFGKQIQQLKGAQVVVA  
TPGRLLDLVNRRLKLD  
KVDALIVDEADRMLDLG  
FSEDLEAISDLAANRGQT  
LMFSATFADRIIRLAERM  
MNEPERIAIETGHSTNTD  
ITQTLHWT DGF EHK KLL  
THWLADETL DQAVVFAS  
TQEDTDMLAEELAEAGH  
SVVALHGAMPQTVRNR  
RLRSIREGRAKILVATDV  
AARGLDVPTISHVINFG  
LPMKHEDYVHRIGRTGRA  
GRTGQAITLATYRERGI

/ / / / 0 1 1 / / / /

|     |          |                   |                    |
|-----|----------|-------------------|--------------------|
| CGG | AGTTCAAC | ATTATGGGTGGTATGC  | RALEDYLEARLNVSEIEG |
| TCT | TCAGATCG | CTTTTGGTAAACAAATT | LEPSPPPARPRREGGR   |
| TCA | TCCACG   | CAACAGCTTAAAGGTG  | GGNGGRDGRRFEFEGGN  |
| AAA |          | CTCAAGTTGTAGTTGCG | FKRREGGRDDRPRRSF   |
| CCA |          | ACTCCAGGTCGTTTATT | DDKPRGERPAFGGEDR   |
| CCT |          | AGACTTAGTTAACCGTC | PRREFNSDRPRREGGF   |
| TCA |          | GTCAATTAAGCTAGAC  | NDKPRFDSNDDNRGNR   |
| CGA |          | AAAGTTGATGCTTTAAT | VDYKPRRENGFGDRPQ   |
| CGT |          | CGTGGACGAAGCTGAC  | RSFGGEDRPRREGGF    |
| GGA |          | CGTATGTTAGACCTTGG | DRPKRSFGGEERPRRA   |
| CGG |          | TTTCTCTGAAGACTTAG | VREEHFNQESRGERR    |
| TCT |          | AAGCGATCAGTGACTT  | KFDR               |
| GAG |          | GGCTGCGAATCGTGGT  |                    |
| TTG |          | CAAACGTTAATGTTCTC |                    |
| AAC |          | TGCAACTTTTGCTGACC |                    |
| TCG |          | GTATTATTCGTCTTGCT |                    |
| CGA |          | GAGCGCATGATGAATG  |                    |
| CGT |          | AACCTGAGCGTATTGC  |                    |
| GGA |          | AATTGAAACTGGTCACA |                    |
| CGA |          | GCACCAATACTGACATC |                    |
| TCT |          | ACCCAAACTTTTACTG  |                    |
| TCA |          | GACAGATGGTTTCGAA  |                    |
| CCA |          | CACAAGAAGAACTTCT  |                    |
| CCG |          | GACTCACTGGTTGGCT  |                    |
| AAG |          | GATGAAACGCTTGACC  |                    |
| CTA |          | AAGCTGTTGTATTGCG  |                    |
| CGA |          | AGCACACAAGAAGATA  |                    |
| CGT |          | CAGATATGTTGGCTGAA |                    |
| GGA |          | GAACTTGCAGAAGCAG  |                    |
| CGG |          | GTCACTCAGTTGTTGCA |                    |
| TCT |          | CTTCACGGTGCAATGC  |                    |
| TCA |          | CGCAAACAGTTCGTAA  |                    |
| AAA |          | CCGTCGTTTACGTAGTA |                    |



CCA  
CCT  
TCA  
CGA

TCCGTGAAGGCCGTGC  
GAAAATCTTAGTTGCTA  
CTGACGTTGCTGCACG  
TGGTCTTGACGTTCCAA  
CAATTCACACGTTATT  
AACTTCGGCTTACCAAT  
GAAGCATGAAGATTATG  
TACACCGTATTGGTCGT  
ACAGGTCGTGCTGGTC  
GTACAGGTCAAGCGAT  
TACTTTAGCGACTTATC  
GTGAACGCGGTAAAAT  
CCGTGCGCTTGAAGAC  
TACTTAGAAGCTCGTTT  
AAATGTTTCTGAAATTG  
AAGGTTTAGAGCCATCT  
CCACCTCCAGCTCGTC  
CACGTCGTGAAGGTGG  
TCGTGGTGGTAACGGT  
GGCCGTGATGGTCGTC  
GTTTCGAGGGTGAAGG  
TAACTTCAAACGTCGTG  
AAGGTGGTCGTGATGA  
TCGTCCACGTCGTAGC  
TTCGATGATAAGCCTCG  
TGGTGAGCGTCCTGCT  
TTCGGTGGCGAAGATC  
GTCCACGTCGCGAGTT  
CAACTCAGATCGTCCA  
CGCCGTGAAGGTGGTT  
TTAACGATAAGCCTCGT  
TTTGATTCAAATGATGA  
CAATCGTGGTAACCGC

NODE  
 \_13\_le  
 ngth\_1  
 16163  
 \_cov\_  
 17.981  
 428

1158  
 35

G      A

upstrea  
 m\_gene  
 \_variant

C1.pe  
 g.559

-897C>T

GTAGACTATAAACACG  
 TCGTGAAAACGGTTTC  
 GGTGACCGTCCACAAC  
 GTAGCTTTGGTGGTGA  
 AGATCGTCCACGTCGT  
 GAAGGCGGTTTTGGTG  
 ATCGTCCAAAACGTAG  
 CTTTGGTGGTGAAGAA  
 CGTCCACGTCGCGCAG  
 TTCGCGAAGAACACTTT  
 AATCAAGAATCTCGTGG  
 TGAGCGCCGTCGTAAA  
 TTCGACCGTTAA  
 ATGCAAATGATTAGCCC  
 GACTCGACTTGCTTCTT  
 TTAATGATATGCAAGAC  
 AGTAATTTCTTTACTCA  
 GTTTTTAAATATCTGTT  
 GTGGAAAACCTGTACA  
 ACCAACTATAAAGAAT  
 ATGTGTCTTTACAACAT  
 GCTCTTTATGAAGGGG  
 ATATTGAAATGGATAAG  
 GTGATTGATTGGGTTAT  
 GCAAAGTCCCAAAGAT  
 CACCGAATAATTTTTGA  
 GAAGATATTATTTCAAG  
 GCCGTGATGAATTCTCT  
 AAGCCTATACCTACTGA  
 ATTAGAAAATTTCTTTAA  
 TTACATTGAACAAAAAC  
 CTGATTGGTTAGACCAA  
 CAACAAATTGATGAGG

MQMISPTRLASFNDMQD  
 SNFFTQFLNICCGKPVQ  
 PNYKEYVSLQHALYEGD  
 IEMDKVIDWVMQSPKDH  
 RIIFEKILFQGRDEFKPI  
 PTELENFFNYIEQKPDW  
 LDQQQIDEAVKFTHRLGI  
 NNGFILRDLSLMAGYLYP  
 GFNQPLILTGALKKEAGT  
 RLAETTKWWVDITEPQG  
 LFRLSAGFTSTIYVRFIHA  
 LVRRQLKKSSRWSEIW  
 GIPLNQFDLAMTNLAFSS  
 VLLGIRALGIWPTKQEA  
 KSFLHFWRYVGWLMGID  
 EKWLIQSEPEGWRLLYW  
 MQFAHPRSDHSSIELGL  
 SLSKEPFERKYLHLRSL  
 QQKLAYRQHLELTQFFI  
 GKCRMKLLGLPQQSAS

/ / / / 0 0 1 / / / /

|                     |                     |
|---------------------|---------------------|
| CTGTAAATTTACCCAT    | WFAYYLIVRNLLLLYNGAK |
| CGTTTAGGAATAAATAA   | LSPKVEKFLSKSGRNIQK  |
| TGGTTTTATTCTTAGAG   | LGLTLYQNQGKAKTLAS   |
| ACTTATCCTTAATGGCG   | MHQ                 |
| GGATATTTATATCCGGG   |                     |
| GTTTAATCAACCCCTAA   |                     |
| TTTTAACGGGTGCATTA   |                     |
| AAGAAAGAAGCGGGAA    |                     |
| CACGTTTAGCAGAAAC    |                     |
| CACAAAATGGTGGGTG    |                     |
| GATATTACTIONAACCTCA |                     |
| AGGGCTTTTTCGTTTGA   |                     |
| GTGCAGGTTTTACGTCA   |                     |
| ACGATTTATGTTGCTT    |                     |
| TATTCATGCACTCGTTC   |                     |
| GCCGGCAATTAATAAAA   |                     |
| GTCTAGCCGTTGGGAT    |                     |
| AGTGAGATTTGGGGAA    |                     |
| TTCCTCTTAATCAATTT   |                     |
| GATTTAGCAATGACTAA   |                     |
| TTTGGCTTTTAGCAGTG   |                     |
| TCGTTTTACTCGGTATT   |                     |
| AGAGCTTTAGGTATATG   |                     |
| GCCAACAAAACAAGAG    |                     |
| GCAAAGAGTTTTTTTACA  |                     |
| TTTCTGGCGTTATGTGCG  |                     |
| GCTGGTTAATGGGTATT   |                     |
| GATGAAAAATGGCTTAT   |                     |
| TCAGTCTGAACCTGAG    |                     |
| GGTTGGAGTTACTTTA    |                     |
| CTGGATGCAGTTTGCT    |                     |
| CATCCTCGCTCCGATC    |                     |
| ACAGCAGTATTGAATTA   |                     |

GGATTGAGCTTGTCGA  
 AAGAACCTTTTGAGAGA  
 AAATATCTGCATTTACG  
 CTCTTTACAGCAGAAAC  
 TTGCTTATCGACAACAT  
 TTAGAACTTACCCAATT  
 TTTTATTGGTAAGAAAA  
 GAATGAAACTACTCGG  
 ATTGCCTCAGCAATCTG  
 CCTCATGGTTTGCTTAT  
 TATTTAATTGTGCGTAA  
 TTTACTACTTTATAATG  
 GCGCAAAGCTTTCACC  
 AAAAGTTGAAAAGTTTT  
 TATCTAAATCAGGCCGT  
 AATATACAAAACCTTGG  
 CTTAACGCTTTATCAGA  
 ATCAAGGTAAGGCAAA  
 AACCTTAGCAAGTATGC  
 ATCAATAA

ATGTTCTTACTGAAAAA MFLKLNLVSSISKVTQDL  
 TCTCGTCTCTTCAATAT GNIVSITPVVNTGSSVNV  
 CAAAAGTTACTCAGGAC NVSDINIANVSTTGLLSN  
 CTGGGTAATATTGTATC VISTVTDTVSHTTDLVS  
 GATAACCCCTGTAGTAA NVVGTVTGTVGSTSPID  
 ACACAGGTTTCTCTGTT TVTNIIGGVTGGVTGNPL  
 AATGTAAATGTTTCTGA EVVTDIIGGVTGGVVGG  
 TATCAACATTGCTAATG TSPISPVIDVVQGGIDILQ  
 TTTCAACAACAGGCTTA GVESLKTEIINTGIETVAD  
 CTTTCTAATGTGATTTT AVIGVLPQAEHPVSEIAD  
 AACTGTAACCGATACAG LGTLTFETSRDTVNGAL  
 TTTACATACAACCACA EVVSDLVGGDIQGATES  
 GACTTAGTTTCTAATGT ATGILDTLITNGTTATGIV

/ / / / 0 1 1 / / / / /

NODE  
 \_33\_le  
 ngth\_2  
 3883\_ 1720 G A  
 cov\_1  
 5.8555  
 83  
 upstrea  
 m\_gene  
 \_variant  
 C1.pe  
 g.2207  
 -206C>T

|                    |                      |
|--------------------|----------------------|
| AGTTGGTACCGTAACA   | TGVVGSVTDVIGGVTGG    |
| GGTACTGTAGGTTCTAC  | VDGNPLEVITDIIGGVTG   |
| AAGCCCAATTGATACTG  | GVDGNPLEVITDIIGGVT   |
| TAACCAATATTATTGGC  | GGVGGDNPLGVVTDIIG    |
| GGCGTAACGGGTGGCG   | GVTGGIIGGGTSPISPVID  |
| TTACAGGCAACCCTCTT  | VVQGGIDILQGVESLKTE   |
| GAAGTTGTTACTGACAT  | IINTGIDTVADTIIGVLPQA |
| TATCGGCGGAGTAACG   | EHPVSEIADLGLTLFETS   |
| GGTGGTGTGTCGGCG    | RDTVNGALEVVS DLVGG   |
| GAACTTCTCCAATCTCT  | DIQGATENATGILGLTIQ   |
| CCAGTAATCGATGTTGT  | NGSTATGIVTDILGGVTG   |
| TCAAGGCGGCATTGAT   | TIGGVTGGIGGDNPLGIV   |
| ATTCTTCAAGGCGTTGA  | TDIIGGVTGGIGGDNPLG   |
| AAGCTTAAAACTGAAA   | VVTDIIGGVTGGIGGDNP   |
| TTATTAATACAGGCATT  | LGVVTDIIGGVSGGGGG    |
| GAAACTGTAGCTGATG   | EYD                  |
| CAGTTATTGGTGATTA   |                      |
| CCTCAAGCTGAGCATC   |                      |
| CAGTTTCTGAAATTGCA  |                      |
| GACCTTGGCACATTAAC  |                      |
| TTTTGAACTTCTCGTG   |                      |
| ACACAGTCAATGGTGC   |                      |
| TCTTGAAGTTGTTTCTG  |                      |
| ATTTAGTCGGTGGTGAT  |                      |
| ATTCAAGGCGCTACTG   |                      |
| AATCAGCGACTGGTATT  |                      |
| CTCGATACGCTTATTAC  |                      |
| AAATGGCACAACCTGCTA |                      |
| CAGGTATTGTTACTGGT  |                      |
| GTGGTTGGAAGTGTTA   |                      |
| CTGATGTTATTGGTGGC  |                      |
| GTAAGTGGTGGTGTG    |                      |
| ATGGCAACCCACTTGA   |                      |

AGTGATTACAGATATTA  
TCGGTGGTGTAAGTGG  
CGGTGTTGATGGCAAC  
CCACTTGAAGTGATTAC  
AGATATTATTGGCGGTG  
TAACTGGTGGTGTGG  
GGGTGATAACCCTCTT  
GGCGTAGTAACTGATAT  
TATCGGCGGCGTAACC  
GGTGGCATTATTGGTG  
GCGGTACATCTCCTATT  
TCTCCAGTTATTGATGT  
TGTTCAAGGTGGCATC  
GATATTCTTCAAGGCGT  
TGAAAGCCTAAAACTG  
AAATTATTAACACTGGT  
ATTGATACAGTAGCCGA  
CACTATTATTGGTGTAT  
TACCTCAAGCTGAGCAT  
CCAGTTTCTGAAATTGC  
AGACCTTGGCACATTAA  
CTTTCGAAACGTCTCGT  
GACACGGTCAATGGTG  
CTCTTGAAGTTGTTTCT  
GATTTAGTCGGTGGCG  
ATATTCAAGGTGCTACT  
GAAAATGCAACTGGTAT  
TTTAGGAACACTTATTC  
AGAATGGTTCAACAGC  
GACTGGAATTGTTACTG  
ATATTCTTGGTGGCGTA  
ACAGGTAATATCGGCG  
GCGTAACTGGTGGTAT

CGGTGGTGACAATCCG  
CTCGGTATAGTAACTGA  
CATTATCGGCGGTGTTA  
CTGGCGGTATCGGCGG  
TGATAATCCGCTTGGTG  
TAGTGA CTGACATTATC  
GGTGGTGT TACTGGCG  
GTATCGGCGGTGATAA  
TCCGCTTGGTGTAGTG  
ACTGACATTATCGGAG  
GTGTTAGTGGGGGTGG  
TGGTGGTGAGTATGAT

NODE  
\_46\_le  
ngth\_5  
019\_c 1880 T  
ov\_13  
0.4757  
18  
TAA  
GAT  
CTT  
GGT  
TTA  
TTA  
ACT intergeni  
TCT c\_region  
GTG  
ATT  
TCA  
TTA  
TCA  
CG

/ / / / 0 0 1 / / / / /

NODE  
\_46\_le  
ngth\_5  
019\_c 1980 G  
ov\_13  
0.4757  
18  
A intergeni  
c\_region

/ / / / 1 0 0 / / / / /

|                                                           |     |   |   |                            |                 |       |          |                                                                                                                                                                                                                                                                                                                                                                                                                                                                                        |                                                                                                                                                                                         |                         |
|-----------------------------------------------------------|-----|---|---|----------------------------|-----------------|-------|----------|----------------------------------------------------------------------------------------------------------------------------------------------------------------------------------------------------------------------------------------------------------------------------------------------------------------------------------------------------------------------------------------------------------------------------------------------------------------------------------------|-----------------------------------------------------------------------------------------------------------------------------------------------------------------------------------------|-------------------------|
| NODE<br>_165_l<br>ength_<br>137_c<br>ov_17.<br>61666<br>7 | 123 | G | A | synony<br>mous_v<br>ariant | C1.pe<br>g.794  | 15C>T | Asp5Asp  | GAGTTAGGCACAGACG<br>GCAGCTTCAATGCACA<br>AGTGGCGTTGGGACCA<br>GATGCGCTTGACGGCA<br>CAGTGGTGAATGTTAAC<br>GGTACTAACTACACCGT<br>GACAGCAGCTGACCTT<br>GCAAACGGCTATATCA<br>CAGCA<br>GAGTTAGGCACAGACG<br>GCAGCTTCAATGCACA<br>AGTGGCGTTGGGACCA<br>GATGCGCTTGACGGCA<br>CAGTGGTGAATGTTAAC<br>GGTACTAACTACACCGT<br>GACAGCAGCTGACCTT<br>GCAAACGGCTATATCA<br>CAGCA                                                                                                                                     | ELGTDGSFNAQVALGPD<br>ALDGTVVNVNGTNYTVT<br>AADLANGYITA                                                                                                                                   | / / / / 1 0 0 / / / / / |
| NODE<br>_165_l<br>ength_<br>137_c<br>ov_17.<br>61666<br>7 | 127 | G | T | missens<br>e_varian<br>t   | C1.pe<br>g.794  | 11C>A | Thr4Lys  | GAGTTAGGCACAGACG<br>GCAGCTTCAATGCACA<br>AGTGGCGTTGGGACCA<br>GATGCGCTTGACGGCA<br>CAGTGGTGAATGTTAAC<br>GGTACTAACTACACCGT<br>GACAGCAGCTGACCTT<br>GCAAACGGCTATATCA<br>CAGCA<br>CCTGAAGACCTAAATG<br>GCGACGGTATCTTGAA<br>TGCAGACGAGTTAGGC<br>ACAGACGGCAGCTTCA<br>ATGCACAAGTGGCATT<br>GGACCGGATGCAGTTG<br>ATGGCACAGTGGTGAA<br>TGTTAACGGTACTAACT<br>ACACCGTGACAGCAGC<br>TGACCTTGCAAACGGC<br>TATATCACAGCAACTCT<br>GGATGCAACAGCAGCC<br>GATCCTGTGACTGGTC<br>AGATTGTGATTCATGCT<br>GAGGCTGTAGATGCGC | ELGTDGSFNAQVALGPD<br>ALDGTVVNVNGTNYTVT<br>AADLANGYITA                                                                                                                                   | / / / / 1 0 0 / / / / / |
| NODE<br>_63_le<br>ngth_4<br>64_co<br>v_45.4<br>85788      | 411 | G | A | synony<br>mous_v<br>ariant | C1.pe<br>g.3027 | 54C>T | Asp18Asp | GAGTTAGGCACAGACG<br>GCAGCTTCAATGCACA<br>AGTGGCGTTGGGACCA<br>GATGCGCTTGACGGCA<br>CAGTGGTGAATGTTAAC<br>GGTACTAACTACACCGT<br>GACAGCAGCTGACCTT<br>GCAAACGGCTATATCA<br>CAGCA<br>CCTGAAGACCTAAATG<br>GCGACGGTATCTTGAA<br>TGCAGACGAGTTAGGC<br>ACAGACGGCAGCTTCA<br>ATGCACAAGTGGCATT<br>GGACCGGATGCAGTTG<br>ATGGCACAGTGGTGAA<br>TGTTAACGGTACTAACT<br>ACACCGTGACAGCAGC<br>TGACCTTGCAAACGGC<br>TATATCACAGCAACTCT<br>GGATGCAACAGCAGCC<br>GATCCTGTGACTGGTC<br>AGATTGTGATTCATGCT<br>GAGGCTGTAGATGCGC | PEDLNLDGILNADELGT<br>DGSFNAQVALGPD<br>GTVVNVNGTNYTVTAAD<br>LANGYITATLDATAADPV<br>TGQIVIHAEAVDAQGNV<br>DVADADVTLTIDTTPQDL<br>ITAITVPEDLNLDGILNAA<br>ELGTDGSFNAQVALGPD<br>AVDGTVVNVNGTNYT | / / / / 0 1 1 / / / / / |



AAGGTAACGTTGATGTT  
 GCTGACGCAGATGTAA  
 CCTTAACCATTGATACA  
 ACTCCACAAGACCTGAT  
 TACAGCAATTACGGTTC  
 CTGAAGACCTAAATGG  
 CGACGGTATCTTGAAT  
 GCTGCAGAACTTGGTA  
 CAGATGGCAGCTTCAA  
 TGCACAAGTGGCATT  
 GGACCGGATGCAGTTG  
 ATGGCACAGTGGTGAA  
 TGTTAACGGTACTAACT  
 ACACC

NODE  
 \_66\_le  
 ngth\_3  
 47\_co 270 A G intergeni  
 v\_102. c\_region  
 73703  
 7

/ / / / 0 1 1 / / / /

NODE  
 \_155\_l  
 ength\_  
 3160\_ 114 T C upstrea  
 cov\_7 m\_gene L6.peg  
 8.8401 \_variant .478 -124T>C  
 87

ATGCCTTCAATTGAGCC  
 AGCTTCACCGACAATCA  
 ATTTCAAATTGAAGTG  
 ATTAATCAGGTGAGTG  
 GGGCGACAGTTGAAGC  
 CGAACAACTGGACGAG  
 CAAACAGTCCGGATCA  
 TTGTTAAAGATGAACTG  
 GATAAGCAGCTTCCAA  
 GAACGGTACCTAAGCT  
 TGTAAGTGATCAAATCG  
 CAAATCCAACTCAACC

MPSIEPASPTINFKIEVIN  
 QVSGATVEAEQLDEQTV  
 RIIVKDELDKQLPRTVPK / / / / / / / 1 0 1 0 1  
 LVSDQIANPNSTISRSLT  
 ENTTARRNRT

ATTAGTCGGTCTTTGAC  
 TGAGAATACGACAGCG  
 AGAAGAAATCGTACTTA  
 A

|        |     |   |   |           |  |  |  |  |                         |
|--------|-----|---|---|-----------|--|--|--|--|-------------------------|
| NODE   |     |   |   |           |  |  |  |  |                         |
| _30_le |     |   |   |           |  |  |  |  |                         |
| ngth_1 |     |   |   |           |  |  |  |  |                         |
| 922_c  | 158 | A | G | intergeni |  |  |  |  | / / / / / / / 1 0 1 1 1 |
| ov_27  |     |   |   | c_region  |  |  |  |  |                         |
| 4.8293 |     |   |   |           |  |  |  |  |                         |
| 46     |     |   |   |           |  |  |  |  |                         |
| NODE   |     |   |   |           |  |  |  |  |                         |
| _30_le |     |   |   |           |  |  |  |  |                         |
| ngth_1 |     |   |   |           |  |  |  |  |                         |
| 922_c  | 169 | A | G | intergeni |  |  |  |  | / / / / / / / 1 0 1 1 1 |
| ov_27  |     |   |   | c_region  |  |  |  |  |                         |
| 4.8293 |     |   |   |           |  |  |  |  |                         |
| 46     |     |   |   |           |  |  |  |  |                         |

|        |     |   |   |          |        |        |           |  |  |                         |
|--------|-----|---|---|----------|--------|--------|-----------|--|--|-------------------------|
| NODE   |     |   |   |          |        |        |           |  |  |                         |
| _50_le |     |   |   |          |        |        |           |  |  |                         |
| ngth_6 |     |   |   |          |        |        |           |  |  |                         |
| 99_co  | 564 | G | A | missens  | L6.peg | 550G>A | Gly184Ser |  |  | / / / / / / / 1 1 0 1 1 |
| v_171. |     |   |   | e_varian | .2348  |        |           |  |  |                         |
| 09155  |     |   |   | t        |        |        |           |  |  |                         |
| 3      |     |   |   |          |        |        |           |  |  |                         |

  

|                   |                    |
|-------------------|--------------------|
| ATGAACCCATTCAAAGG | MNPFKGRHFQRDILWA   |
| CCGGCATTTCAGCGT   | VRWYCKYGISYRELQEM  |
| GACATCATTCTGTGGG  | LAERGVNVDHSTIYRWV  |
| CCGTACGCTGGTACTG  | QRYAPEMEKRLRWYWR   |
| CAAATACGGCATCAGTT | NPSDLCPWHMDETYVK   |
| ACCGTGAGCTGCAGGA  | VNGRWAYLYRAVDSRG   |
| GATGCTGGCTGAACGC  | RTVDFYLSSRRNSKAAY  |
| GGAGTGAATGTCGATC  | RFLGKILNNVKKWQIPRF |
| ACTCCACGATTTACCGC | INTDKAPAYGRALALLKR |
| TGGGTTACGCGTTATG  | EGRCPSDVEHRQIKYRN  |
| CGCCTGAAATGGAAAA  | NVIECDHGKLRIGATL   |
| ACGGCTGCGCTGGTAC  | GFKSMKTAYATIKGIEVM |
| TGGCGTAACCCTTCCG  | RALRKGQASAFYYGDPL  |
| ATCTTTGCCCGTGGCA  | GEMRLVSRVFEM       |
| CATGGATGAAACCTAC  |                    |

GTGAAGGTCAATGGCC  
GCTGGGCGTATCTGTA  
CCGGGCCGTCGACAGC  
CGGGGCCGCACTGTCTG  
ATTTTTATCTCTCCTCC  
CGTCGTAACAGCAAAG  
CTGCATACCGGTTTCTG  
GGTAAAATCCTCAACAA  
CGTGAAGAAGTGGCAG  
ATCCCGCGATTCAACAA  
CACGGATAAAGCGCCC  
GCCTATGGTCGCGCGC  
TTGCTCTGCTCAAACGC  
GAAGGCCGGTGCCCGT  
CTGACGTTGAACACCG  
ACAGATTAAGTACCGG  
AACAACGTGATTGAATG  
CGATCATGGCAAACCTG  
AAACGGATAATCGGCG  
CCACGCTGGGATTTAA  
ATCCATGAAGACGGCT  
TACGCCACCATCAAAG  
GTATTGAGGTGATGCG  
TGCACTACGCAAAGGC  
CAGGCCTCAGCATTTTA  
TTATGGTGATCCCCTG  
GGCGAAATGCGCCTGG  
TAAGCAGAGTTTTTGAA  
ATGTAA

NODE  
\_29\_le  
ngth\_3 3312 T C intergeni  
402\_c c\_region

/ / / / / / / 0 0 0 1 0

ov\_28  
1.5529  
17

NODE  
\_32\_le  
ngth\_6  
5492\_  
cov\_4  
5.1184  
27

G  
A  
A  
A  
T  
T  
G  
C  
A  
T  
G  
T

upstrea  
m\_gene  
\_variant

L6.peg  
.1770

-1595\_  
1585delACA  
TGCAATTT

ATGGCAGAACAGCAAC  
CACTGGTTTTGCTTGT  
GACGATGAAGAAGATTT  
GTGCCTTTTAATGCAAA  
TGACACTTGCACGAAT  
GGGGATTAACACACAT  
CTTGCTTATCGGGTTGA  
ACAGGCCAAACAACCTC  
TTCACCTCAGTTTCATTA  
CGATGCGTGTTTAACC  
GACTTAAACCTACCCGA  
TGGGAGCGGGATAGAT  
TTAGTTAAACATGTCTC  
TCAAATTATACTAATA  
CTCCCATTGCCGTTTTA  
ACCGCCTACGGCAATA  
TGGATATTGCAATTGCA  
GCATTAAGCAGGCG  
CTTTTGATTTTGTAAGC  
AAACCGGTCAACCAAG  
TACATCTAGATCAATTA  
TTACAAAAAGCCTTGAA  
TCGGCAAAAAGTAGAG  
CATGATGCTGCTGAGA  
ATGCGTTAGAAAATAAA  
TTATTAATCGGCCGTTT  
TCTACCCATCCAGCAG  
CTACGTATTGCAATTA  
AAAAATTGCGCGCTCA  
CAAGCACCTGTATTTGT

MAEQQLVLLVDDEEDL  
CLLMQMTLARMGIKTHL  
AYRVEQAKQLFTQFH  
YD  
ACLTDLNLPDGGSIDLVK  
HVSQNYTNTPIAVLTAYG  
NMDIAIAALKAGAFDFVS  
KPVNQVHLDQLLQKALN  
RQKVEHDAENALENKL  
LIGRSLPIQQLRIAIIK  
KIAR  
SQAPVFVTGESGTGKEV  
VANLVHRLSNRSEGP  
FIA  
INCGAIPTELMESE  
LFGH  
KKGSFTGATQDKQGLIL  
SAHGGSLFLDEIAELPLS  
MQVKLLRAVQEKKIRPV  
GSDQEIDVDFRVISASH  
QDLDLLVRQGKFRQDLF  
FRIHVMDLILPPLRERGE  
DVLLLANHFQKICMEWE  
TPPKQLTEAAETYLLQQ  
HFPGNVRELNRMIERAIT  
LSEDTTIDVSHLHPAPLR  
ANISNPFASAAQSIQTTV  
AAPQVVKKLPSEGLERY  
LENIEKDILLNALNMTHW  
NRTLAAKKLGMFRSLR  
YRLKKFGLDTETEQEV

/ / / / / / / 0 0 1 1 1

TACCGGTGAGTCTGGA  
ACAGGTAAAGAAGTAG  
TTGCTAACTTAGTTCAT  
CGGCTGAGTAACCGTA  
GTGAAGGCCCTTTTATT  
GCGATTAAGTGCAGT  
CTATTCCAACCGAACTC  
ATGGAAAGTGAGCTTTT  
TGGGCATAAAAAAGGG  
AGCTTTACCGGAGCAA  
CTCAAGATAACAAGG  
CCTCATTATCGGCAC  
ACGGTGGCAGTTTATTT  
TTAGATGAAATTGCCGA  
ATTACCTTTAAGTATGC  
AGGTCAAAGTCTCCG  
TGCAGTACAGGAAAAA  
AAGATCCGACCCGTCG  
GTTTCAGATCAGGAAATC  
GATGTTGATTTCCGTGT  
GATTAGTGCAAGTCATC  
AAGATTTAGATTTATTG  
GTTAGACAAGGTAATTT  
CCGTCAAGATTTATTCT  
TCCGTATTCATGTTATG  
GACCTCATATTGCCACC  
TCTACGTGAACGTGGC  
GAAGATGTCCTTTTACT  
AGCCAATCACTTTATT  
AGAAAATTTGTATGGAG  
TGGGAAACGCCACCTA  
AACAATTAACAGAAGCG  
GCCGAACTTATCTGCT

ACAGCAACACTTTCCG  
 GGTAATGTTGCGGAATT  
 AAGAAATATGATTGAGC  
 GCGCAATTACCTTAAGT  
 GAAGATACCACTATAGA  
 TGTATCTCATTTACATC  
 CTGCTCCACTAAGAGC  
 AAATATTTCTAATCCTTT  
 TGCTTCAGCTGCTCAA  
 GCATACAAACCACTGT  
 GGCAGCTCCTCAAGTC  
 GTAAAAAATTACCAAG  
 TGAAGGCTTAGAACGTT  
 ATTTAGAAAATATTGAA  
 AAAGATATTTTACTCAA  
 TGCACTCAATATGACTC  
 ATTGGAATCGTACCTTA  
 GCAGCTAAAAAATTAGG  
 AATGACTTTCCGCTCTT  
 TACGCTATCGTCTGAAA  
 AAATTTGGCTTAGATAC  
 GGAGACAGAACAGGAA  
 GTATAA

ATGAGCTACCAGAACT MSYQKLSRDQIAQLVAQ  
 CAGCCGTGACCAGATT DIPDGAYVNLGIGLPTKIA  
 GCGCAACTTGTGGCAC SYLPADKDVFLHSENGL  
 AAGATATTCCCGATGGA LAFGPPPAAGEEDPELIN  
 GCCTATGTGAACTTGG AGKEFVTMLEGGSFFHH  
 GCATTGGCTTACCGAC GDSFAMMRGGHLDIAVL  
 CAAGATTGCCAGCTACT GAFQVAANGDLANWHT  
 TACCTGCTGACAAAGAT GAPDAIPAVGGAMD LAV  
 GTCTTCCTACATTCTGA GAKKVFITTDHITKQGE P  
 AAATGGCCTGTTGGCTT KIVAEITYPVTKHCVDR

/ / / / / / / 0 1 1 1 1

NODE  
 \_114\_I  
 ength\_  
 20019 1895 T G missens  
 7\_cov 99 e\_varian L6.peg 271A>C lle91Leu  
 \_34.99 .365  
 1173

TTGGCCCACCACCAGC IYDLCVIDVTKDGLKVIE  
 TGCAGGTGAAGAAGAC KVEGLSFDELQALTGAT  
 CCTGAACTGATTAATGC LIDATQG  
 GGGTAAAGAGTTTGTG  
 ACCATGCTTGAAGGCG  
 GCAGCTTTTTCCACCAT  
 GGCGATTCATTTGCCAT  
 GATGCGTGGTGGTCAC  
 CTTGATATTGCGGTGCT  
 TGGGGCATTTCAGGTG  
 GCAGCCAATGGTGA  
 TGGCGAACTGGCACAC  
 GGGTGCACCGGATGCG  
 ATTCCTGCGGTAGGTG  
 GTGCAATGGATTTGGC  
 AGTTGGTGCCAAGAAA  
 GTATTTATCACTACAGA  
 CCACATCACCAAGCAA  
 GGTGAGCCGAAGATTG  
 TCGCTGAGCTCACTTAT  
 CCGGTAACGGGTAAAC  
 ACTGTGTTGACCGTATT  
 TACACTGACCTGTGTGT  
 GATTGATGTGACCAAA  
 GACGGTTTAAAGGTGA  
 TTGAGAAAGTGGAAAG  
 TCTTAGCTTTGATGAGT  
 TACAGGCTTTAACCGGT  
 GCAACTTTGATTGATGC  
 GACTCAAGGGTAA  
 ATGAGCTACCAGAACT MSYQKLSRDQIAQLVAQ  
 CAGCCGTGACCAGATT DIPDGAYVNLGIGLPTKIA / / / / / / / 0 1 1 1 1  
 GCGCAACTTGTGGCAC SYLPADKDVFLHSENGL

NODE  
 \_114\_I  
 ength\_

1896  
 02

A G

missens  
 e\_varian  
 t

L6.peg  
 .365

268T>C Phe90Leu

/ / / / / / / 0 1 1 1 1

20019  
7\_cov  
\_34.99  
1173

|                     |                    |
|---------------------|--------------------|
| AAGATATCCCGATGGA    | LAFGPPPAAGEEDPELIN |
| GCCTATGTGAACTTGG    | AGKEFVTMLEGGSFFHH  |
| GCATTGGCTTACCGAC    | GDSFAMMRGGHLDIAVL  |
| CAAGATTGCCAGCTACT   | GAFQVAANGDLANWHT   |
| TACCTGCTGACAAAGAT   | GAPDAIPAVGGAMDLAV  |
| GTCTTCCTACATTCTGA   | GAKKVFITTDHITKQGEF |
| AAATGGCCTGTTGGCTT   | KIVAELTYPVTGKHCVDR |
| TTGGCCCACCACCAGC    | IYDLCVIDVTKDGLKVIE |
| TGCAGGTGAAGAAGAC    | KVEGLSFDELQALTGAT  |
| CCTGAACTGATTAATGC   | LIDATQG            |
| GGGTAAAGAGTTTGTG    |                    |
| ACCATGCTTGAAGGCG    |                    |
| GCAGCTTTTTCCACCAT   |                    |
| GGCGATTCATTTGCCAT   |                    |
| GATGCGTGGTGGTCAC    |                    |
| CTTGATATTGCGGTGCT   |                    |
| TGGGGCATTTCAGGTG    |                    |
| GCAGCCAATGGTGACTION |                    |
| TGGCGAACTGGCACAC    |                    |
| GGGTGCACCGGATGCG    |                    |
| ATTCCTGCGGTAGGTG    |                    |
| GTGCAATGGATTTGGC    |                    |
| AGTTGGTGCCAAGAAA    |                    |
| GTATTTATCACTACAGA   |                    |
| CCACATCACCAAGCAA    |                    |
| GGTGAGCCGAAGATTG    |                    |
| TCGCTGAGCTCACTTAT   |                    |
| CCGGTAACGGGTAAAC    |                    |
| ACTGTGTTGACCGTATT   |                    |
| TACACTGACCTGTGTGT   |                    |
| GATTGATGTGACCAAAA   |                    |
| GACGGTTTTAAAGGTGA   |                    |
| TTGAGAAAGTGGAAGG    |                    |



NODE  
\_114\_I  
ength\_  
20019  
7\_cov  
\_34.99  
1173

1896  
05

G T

synony  
mous\_v  
ariant

L6.peg  
.365

265C>A

Arg89Arg

TCTTAGCTTTGATGAGT  
TACAGGCTTTAACCGGT  
GCAACTTTGATTGATGC  
GACTCAAGGGTAA  
ATGAGCTACCAGAACT  
CAGCCGTGACCAGATT  
GCGCAACTTGTGGCAC  
AAGATATTCCCGATGGA  
GCCTATGTGAACTTGG  
GCATTGGCTTACCGAC  
CAAGATTGCCAGCTACT  
TACCTGCTGACAAAGAT  
GTCTTCCTACATTCTGA  
AAATGGCCTGTTGGCTT  
TTGGCCCACCACCAGC  
TGCAGGTGAAGAAGAC  
CCTGAACTGATTAATGC  
GGGTAAAGAGTTTGTG  
ACCATGCTTGAAGGCG  
GCAGCTTTTTCCACCAT  
GGCGATTCATTTGCCAT  
GATGCGTGGTGGTCAC  
CTTGATATTGCGGTGCT  
TGGGGCATTTCAGGTG  
GCAGCCAATGGTGACT  
TGGCGAACTGGCACAC  
GGGTGCACCGGATGCG  
ATTCCTGCGGTAGGTG  
GTGCAATGGATTTGGC  
AGTTGGTGCCAAGAAA  
GTATTTATCACTACAGA  
CCACATCACCAAGCAA  
GGTGAGCCGAAGATTG

MSYQKLSRDQIAQLVAQ  
DIPDGAYVNLGIGLPTKIA  
SYLPADKDVFLHSENGL  
LAFGPPPAAGEEDPELIN  
AGKEFVTMLEGGSFFHH  
GDSFAMMRGGHLDIAVL  
GAFQVAANGDLANWHT  
GAPDAIPAVGGAMD LAV  
GAKKVFITTDHITKQGEP  
KIVAELTYPVTGKHCVDR  
IYDLCVIDVTKDGLKVIE  
KVEGLSFDELQALTGAT  
LIDATQG

/ / / / / / / 0 1 1 1 1

NODE  
\_31\_le  
ngth\_3  
210\_c  
ov\_10  
5.6009  
37

912 C T

synony  
mous\_v  
ariant

L6.peg  
.1746

46C>T

Leu16Leu

TCGCTGAGCTCACTTAT  
CCGGTAACGGGTAAAC  
ACTGTGTTGACCGTATT  
TACTGACCTGTGTGT  
GATTGATGTGACCAA  
GACGGTTTAAAGGTGA  
TTGAGAAAGTGGAAGG  
TCTTAGCTTTGATGAGT  
TACAGGCTTTAACCGGT  
GCAACTTTGATTGATGC  
GACTCAAGGGTAA  
ATGATTGAATCTAATGC  
TGTC AATATCGATCGTA  
GTCGTATCATTCTAAAA  
CCCAATGTGGTTGTCG  
GTTATGAGGGGCAACC  
CTATAAAATTGTGAATG  
TTTTAAATGCCAATGAC  
ATTGTTATATCAAGTCT  
TGATTCGGTACGTAGTC  
TACAGGTCAATGCTAGA  
AGTTTGACCATTTTTAA  
TGGGGGAAATACGCTA  
ACTGAGCGTTTGAATAA  
GGGTGATCAGGATATT  
AGTAATGAAGCTTGCC  
AGATTGCTTTACAACGT  
TATGAGATTATTAAGCC  
TTTGATTGAGTATTCAA  
CGACTGAACTGGTCGA  
AAATAGGGCGAATGAA  
TATGATGTGAATCGCTC  
AACATTGTGGAAATGG

MIESNAVNIDRSRIILKPN  
VVVGYEGQPYKIVNVLN  
ANDIVISSLDSVRS LQVN  
ARSLTIFNGGNTLTERLN  
KGDQDISNEAWQIALQR  
YEIIKPLIEYSTTELVENR  
ANEYDVNRSTLWKWLK  
DYRENNSLMALIPKCRG  
WTTEKSRLSPQVSNIHKQ  
AINDEYLNKKPSISK TIE  
IVKAEC SRLQLEAPHENS  
IRRRREALNDYQVTKARL  
GSKAAIDKFKAAGSFP  
NADYPLAYVQIDHTPLDI  
EIVDDEFREAIGKPHLTL  
AIDVFSRMIVGYYSLEA  
PSTTSVAMCIASCILSKK  
RKLIELDIDA EWQVEGIM  
DSVHTDNGPDFRTNHIS  
KACLKYGIHWEYRPIGG  
ARFGGHIERMLGIVNLE  
MHVLDGTTFSNVQQRG

/ / / / / / / 0 1 0 0 1

|                    |                     |
|--------------------|---------------------|
| CTTAAAGATTATCGGGA  | TYDSAKQACMTLKELEY   |
| AAATAATTCTCTAATGG  | YIVYWITKVYHQKHSAL   |
| CATTGATTCCCAAAAAA  | GTSPIVKWEEGVWGTKT   |
| CGAGGTTGGACAACTG   | TAGTGLKERVSEDTLFI   |
| AAAAATCAAGGTTGTCA  | DFLPEFEATIQRTGVQK   |
| CCTCAAGTGAGCAATAT  | DNLFYFADCLRQWVNSI   |
| CATTAAACAAGCTATCA  | DPEDNNRKRKRKFLFKR   |
| ATGATGAATATTTGAAT  | DPRDISQIWFYEPYSNTY  |
| GCGAAGAAACCCAGTA   | FKVPTAKREIPPISLFEYK |
| TTTCCAAAACGATTGAA  | QVQNYLKSERQDVQNQ    |
| ATTGTAAAAGCAGAGTG  | DEIYKAILHLRDQLNQAR  |
| TTCTCGGCTTCAGCTTG  | SLTRKQRRSNQRKKENA   |
| AAGCACCGCATGAAAA   | KAITQLSEQNQSKKAVV   |
| CTCTATTCGTAGAAGAA  | SESLQTSDDLWSTPLTA   |
| TCGAGGCTTTAAATGAT  | FDDLRL              |
| TACCAAGTAACGAAAG   |                     |
| CACGTCTTGGATCTAAA  |                     |
| GCTGCAATAGATAAATT  |                     |
| TAAGGCTGCTGCTGGT   |                     |
| TCATTCCCAAATGCTGA  |                     |
| TTACCCTTTGGCATATG  |                     |
| TGCAGATTGATCATACA  |                     |
| CCTCTAGATATTGAAAT  |                     |
| CGTGGATGACGAGTTT   |                     |
| AGAGAAGCGATTGGAA   |                     |
| AACCTCATTTAACCTTG  |                     |
| GCAATCGATGTTTTTCAG |                     |
| TCGGATGATCGTAGGG   |                     |
| TATTACCTATCACTAGA  |                     |
| AGCGCCAAGTACGACT   |                     |
| TCAGTGGCGATGTGTA   |                     |
| TCGCATCTTGATTTTG   |                     |
| TCAAAAAACGTAAGTT   |                     |

---

GATCGAACTCGATATTG  
ATGCTGAATGGCAGGT  
CGAAGGGATTATGGAC  
TCGGTGCATACAGATAA  
TGGCCCCGATTTTAGAA  
CCAATCACATCAGTAAA  
GCTTGTCTAAAGTATGG  
GATTCATTGGGAATACC  
GACCAATTGGTGGGGC  
AAGATTTGGCGGCATA  
TCGAGCGTATGCTTGG  
TATCGTCAATCTTGAAA  
TGCATGTCTTGGATGGT  
ACAACTTTTTCAAATGT  
ACAGCAGCGTGGGACT  
TATGATTCCGCTAAACA  
AGCCTGTATGACATTAA  
AAGAGCTTGAATACTAT  
ATCGTGTATTGGATTAC  
TAAAGTTTATCACCAGA  
AGAAACATTCCGCTTTA  
GGAACATCCCCAATCG  
TTAAATGGGAAGAAGG  
TGTTTGGGGGACGAAG  
ACGACAGCAGGTACAG  
GTTTAAAAGAACGTGTA  
TCAGATGAAGATACCTT  
GTTTATTGATTTTCTAC  
CTGAATTTGAAGCGACT  
ATTCAGCGTACAGGGG  
TGCAAAAAGATAACTTA  
TTCTATTTTGCCGACTG  
TTTAAGACAATGGGTTA

---

ATTCTATTGATCCAGAG  
GACAATAATCGAAAGC  
GCAAAAGAAAATTCTTG  
TTTAAACGTGATCCGAG  
GGATATTTACAGATTT  
GGTTTTATGAGCCATAT  
TCTAATACCTATTTTAAA  
GTACCTACCGCAAAGC  
GAGAGATACCACCGAT  
TAGCTTATTTGAATATA  
AGCAGGTTCAGAACTAT  
CTCAAAAGTGAACGTCA  
GGATGTTCAGAATCAG  
GATGAGATTTACAAGG  
CGATTTTGCATCTACGT  
GATCAACTTAATCAGGC  
TAGAAGCTTGACTCGAA  
AGCAACGTCGCTCAAA  
CCAAAGAAAAAAGGAA  
AATGCAAAAGCCATTAC  
TCAGCTTTCCGAACAGA  
ATCAGTCTAAAAAGGCT  
GTAGTTTCTGAAAGTCT  
TCAGACAAGTGATGATT  
TGTGGAGTACTCCTTTA  
ACTGCATTTGACGATTT  
AAGGTGA

---

Table S3 Summary of genes that gained or lost. The bloodstream specific genes were highlighted in red.

| Gene              | Non-unique Gene name | Annotation           | Isolate ID of gene lost            | COG functional categories | description               | Nucleic acid sequence                                                                                                                                                                                                                                                                                                                                                                                                                                                                                                                                                                                                                                                                                                                                                                                                                                                                                                                                      |
|-------------------|----------------------|----------------------|------------------------------------|---------------------------|---------------------------|------------------------------------------------------------------------------------------------------------------------------------------------------------------------------------------------------------------------------------------------------------------------------------------------------------------------------------------------------------------------------------------------------------------------------------------------------------------------------------------------------------------------------------------------------------------------------------------------------------------------------------------------------------------------------------------------------------------------------------------------------------------------------------------------------------------------------------------------------------------------------------------------------------------------------------------------------------|
| <i>group_1297</i> |                      | hypothetical protein | A1, A3<br>L6<br>C4, C6             | /                         | transcriptional regulator | ATGGTCCGTATGGGAGAAACAGGGTTTATGGAATGGACGGAGCATAAAAG<br>TTTGTCAATCACGAATAAATATATTAATTTGATAACACTATTCGTATTTTA<br>TAACAATTGATGTGTTTGCCTAGAAAATGCATTAATAGGAGTGTGTGTGT<br>GGATCTATTTTCATGCCATGA                                                                                                                                                                                                                                                                                                                                                                                                                                                                                                                                                                                                                                                                                                                                                                   |
| <i>group_1301</i> |                      | hypothetical protein | A1, A3<br>L6, L7,<br>L8, L10<br>C4 | /                         | membrane protein          | ATGTCAGTAACAACCTCAAGAGGGTTGCCTGTAACGCCACCCGTTACGCC<br>GCCAATAATATTGGTTACAGTATCAATTGGGCTTGTAACCTACAGTACC<br>TGTTACGGTACCAACTACATTAGAACTAAGTCTGTGGTTGTATGTGAAAC<br>TGTATCGGTTACAGTTGAAATCACATTAGAAAGTAAGCCTGTTGTTGAAAC<br>ATTAGCAATGTTGATATCAGAAACATTTACATTAACAGAGGAACCTGTGTTT<br>ACTACAGGGGTTATCGATACAATATTACCCAGGTCCTGA                                                                                                                                                                                                                                                                                                                                                                                                                                                                                                                                                                                                                                    |
| <i>group_39</i>   |                      | hypothetical protein | A2, A3,<br>A14<br>L9<br>C2, C6     | UW                        | Hep Hag repeat protein    | ATGTTCTTACTGAAAAATCTCGTCTCTTCAATATCAAAAGTTACTCAGGACC<br>TGGGTAATATTGTATCGATAACCCCTGTAGTAAACACAGGTTCTCTGTTA<br>ATGTAAATGTTTCTGATATCAACATTGCTAATGTTTCAACAACAGGCTTACT<br>TTCTAATGTGATTTCAACTGTAACCGATACAGTTTCACATACAACCACAGA<br>CTTAGTTTCTAATGTAGTTGGTACCGTAACAGGTTACTGTAGGTTCTACAAG<br>CCCAATTGATACTGTAACCAATATTATTGGCGGCGTAACGGGTGGCGTTA<br>CAGGCAACCCTCTGAAGTTGTTACTGACATTATCGGCGGAGTAACGGGT<br>GGTGTGTCGGCGGAACCTTCTCCAATCTCTCCAGTAATCGATGTTGTTCAA<br>GGCGGCATTGATATTCTTCAAGGCGTTGAAAGCTTAAAACTGAAATTATT<br>AATACAGGCATTGAACTGTAGCTGATGCAGTTATTGGTGTATTACCTCAA<br>GCTGAGCATCCAGTTTCTGAAATTGCAGACCTTGGCACATTAACTTTTGAA<br>ACTTCTCGTGACACAGTCAATGGTGTCTTGAAGTTGTTTCTGATTTAGTC<br>GGTGGTGTATTCAAGGCGCTACTGAATCAGCGACTGGTATTCTCGATAC<br>GCTTATTACAAATGGCACAACTGCTACAGGTATTGTTACTGGTGTGGTTGG<br>AAGTGTTACTGATGTTATTGGTGGCGTAACTGGTGGTGTGATGGCAACC<br>CACTTGAAGTGATTACAGATATTATCGGTGGTGTAACTGGCGGTGTTGAT<br>GGCAACCCACTTGAAGTGATTACAGATATTATTGGCGGTGTAACCTGGTGG |

TGTTGGGGTGATAACCCTCTTGGCGTAGTAACTGATATTATCGGCGGCG  
TAACCGGTGGCATTATTGGTGGCGGTACATCTCCTATTTCTCCAGTTATTG  
ATGTTGTTCAAGGTGGCATCGATATTCTTCAAGGCGTTGAAAGCCTAAAAA  
CTGAAATTATTAACACTGGTATTGATACAGTAGCCGACACTATTATTGGTG  
TATTACCTCAAGCTGAGCATCCAGTTTCTGAAATTGCAGACCTTGGCACAT  
TAACTTTGAAACGTCTCGTGACACGGTCAATGGTGCTCTTGAAGTTGTTT  
CTGATTTAGTCGGTGGCGATATTCAAGGTGCTACTGAAATGCAACTGGT  
ATTTTAGGAACACTTATTCAGAATGGTTCAACAGCGACTGGAATTGTTACT  
GATATTCTTGGTGGCGTAACAGGTACTATCGGCGGCGTAACTGGTGGTAT  
CGGTGGTGACAATCCGCTCGGTATAGTAACTGACATTATCGGCGGTGTTA  
CTGGCGGTATCGGCGGTGATAATCCGCTTGGTGTAGTACTGACATTATC  
GGTGGTGTACTGGCGGTATCGGCGGTGATAATCCGCTTGGTGTAGTGA  
CTGACATTATCGGTGGTGTACTGGCGGTATCGGTGGTGACAATCCGCTT  
GGTGTAGTAACTGATATTATCGGTGGTGTACTGGCGGTATTGGTGGTGA  
CAATCCGCTTGGTGTAGTAACTGATATTATCGGTGGTGTACTGGCGGTAT  
TGGTGGTGACAATCCGCTTGGTGTAGTAACTGACATTATCGGCGGCGTAA  
CCGGTGGTATTATTGGTGGCGGTACATCTCCTATTTCTCCAGTAATCGATG  
TTGTTCAAGGTGGCATCGATATTCTTCAAGGCGTTGAAAGCCTAAAACTG  
AAATTATTAATACTGGTATTGATACAGTTGCGGATACAATTATCGGTATCCT  
TCCACAAGCAGAACATCCAGTTTCTGAAATTGCAGACCTTGGCACATTAAC  
TTTTGAAACGTCTCGTGACACGGTCAATGGTGCTCTTGAAGTTGTGTCTGA  
TTTAGTCGGTGGTGATATTCAAGGCGTACTGAATCGGCTACCGGTATTC  
TCGATACGCTTATTACAAATGGTACAACACTGCAACTGGTTTGTAACTGAAA  
TCATTGGTGGAGTAACAGGAACTATTGGTGGCGTAACTGGCGGAGATAGC  
CCACTAGGTTTAGTAACTGATTTACTTGGTGGTTTAACTGGTAGCGTAGGC  
GGCGACAGTCCGCTTGGTGTAGTCACTGACCTTCTCGGTGGTTTAACTGG  
TAGCGTAGGTGGCGACAGTCCGCTTGGCGTAGTCACTGATCTGCTCGGC  
GGTTTAACTGGTGGTGTACTGGCGGTACAGACAACCCTATCGGTATCGT  
AACGGATATCGTTGGAAGCTTAACGGGTGGTGTACTGGTGAAGGCAGTT  
TAGATGTTATTTCTAATTTGCTAGGCGGATTGACTGGTGGTAGCTTACTCG  
GTGGTGTAACTTCTACAGTATCTAGCGTAACAAATACAACGCATACGATCG  
TACCGACATCATTACTTACTGATAACTTCTAGAAAACACTCATTCAATACTGT  
TTAA

|                   |                         |                            |   |                                                              |                                                                                                                                                                                                                                                                                                                                                                                                                                                                                                                                                                                                                                                                                                                                                                                                                                                                                                                                                                                                                                                                                                                                                                                                                                                                                                                                                                                                                                                                                                                                                                                                  |
|-------------------|-------------------------|----------------------------|---|--------------------------------------------------------------|--------------------------------------------------------------------------------------------------------------------------------------------------------------------------------------------------------------------------------------------------------------------------------------------------------------------------------------------------------------------------------------------------------------------------------------------------------------------------------------------------------------------------------------------------------------------------------------------------------------------------------------------------------------------------------------------------------------------------------------------------------------------------------------------------------------------------------------------------------------------------------------------------------------------------------------------------------------------------------------------------------------------------------------------------------------------------------------------------------------------------------------------------------------------------------------------------------------------------------------------------------------------------------------------------------------------------------------------------------------------------------------------------------------------------------------------------------------------------------------------------------------------------------------------------------------------------------------------------|
| <i>group_4700</i> | hypothetical protein    | A1<br>L7, L8,<br>L9<br>C4  | / | type I secretion C-terminal target domain-containing protein | ATGTCTGCTGAAACTGTGCCTGTACCTGGCAATGAAGTGTTCCTGCAGG<br>GTCAGTTGCTGTTGCAGTCACTGTATCGCCATCCACCAGGTTACCTGGGT<br>TTGGTACTGACCAGCTGCCATCTGTGCCTGCTACCACTGTTGCAGTTGTG<br>CCATCAGGATAA                                                                                                                                                                                                                                                                                                                                                                                                                                                                                                                                                                                                                                                                                                                                                                                                                                                                                                                                                                                                                                                                                                                                                                                                                                                                                                                                                                                                                    |
| <i>group_839</i>  | hypothetical protein    | A14<br>L9, L10<br>C4<br>C4 | / | putative membrane protein                                    | ATGTTTATTTGCGTTGATGGTGAAGTCAATGGGCAAGTGATAGAAAAAAGG<br>GGCGTTAAGAACAAGATGTATATAAATATTATAAACTCAGTAA<br><br>ATGGCACTTAATGTTTTTAAATTCAAAAAATATGCAAGGATGTTACACTAT<br>TAAATTTAATTTGCTTTTATCTATCTGGCTAGGTTATTTCTGAATATAGGT<br>TTTTTAAAAAATCCATCAACTTACACCTTATAATGGTATTAAGTCAGTTCT<br>TTTCTTAGGGGCGACATTAGTTATTTAATAGCGGCATATAATTTAATTTTT<br>CAATTAATAAATTGGAAATGGACTGCCAAAATCTTTGCAATTTTATTGATAT<br>TTATTGGTGGCTTTAGCTCTTATTTTGTAAACACATTGGGTGTCATTATTTTC<br>ACCCGACCAAATTCAAAATATGGTGCAGACCGATGTTTCGGAATTTACCGA<br>TCTAATCTCTTACGCTTTGTTTTATGGACAGTTTTTTTTGTTATTTGCCCA<br>TTTTTTAATTACTCAAGTTAAATTTAAACAAGAAAAAGCATCACGGTTGTT<br>ATTGAAGAAAGTATTCTCACTGGTAGCTTCATTTGCAGTGGTCGGTGTTTT<br>ACTTTTTACTTACTATGTCGATTTTCGCTGCAATATTTTCGTGAGCATCGTGAT<br>TTAAAAGGGATGATTTACCGCAAATAGTATTTTCATCGCTTATGTCCTTACT<br>ATCATAAGAAGGCTCCGAAGAAAAATCTGCCTCTTGTGATATATGGACAAG<br>ATGCTCATCAAGTTCAGCAAGTACAAAAGAACCCTCCCTAAGTTAATGATAC<br>TTGTTGTAGGTGAAACGGCACGTGCCGAAAGTTTCTCTCTAAATGGGTAT<br>GCAAAAAATACGAATCCGGAGCTTTCTAAACAAGATATTTCAACTTTTCG<br>CAAGTGAGCTCATGCGGTACGGCGACAGCTGTTTCTGTGCCATGTATGTT<br>CTCGGGTATGCCACGTGTAGATTATGATGAGCAATTAGCTAGTCACCGCG<br>AAGGTTTATTAGATATTGCAAAACGTGCGGGTTACCAAGTGACTTGGATTG<br>ATAATAACTCGGGTTGTAAAGGTGCATGTGATCGCGTTGAACAATACCAG<br>ATTCCAGAAAATTTAAAGAAAAAATGGTGTAAAGATGGCGAATGTTATGAT<br>GACATTCTCATTGACAGCTTAAAGCAGTATTTGGCTACTATTGCCAAAGAT<br>GATGATCGTCCGCGTTTGATTGTTCTGCATCAAGTGGGTAGTCATGGACC<br>TGCATATTACAAGCGTGCACCTGAGGCATATCAACCTTTTAAACCGACTTG<br>TGATACTAATGCGATACAGGGCTGTTTCGCAAACTGAATTGCTAAATAGTTA<br>TGATAATACAATTGTATATACAGACCATGTATTAAGCCAAATGATTAATACT |
| <i>eptA_2</i>     | Phosphotransferase EptA | L9                         | S | Domain of unknown function (DUF1705)                         |                                                                                                                                                                                                                                                                                                                                                                                                                                                                                                                                                                                                                                                                                                                                                                                                                                                                                                                                                                                                                                                                                                                                                                                                                                                                                                                                                                                                                                                                                                                                                                                                  |



|                  |                             |                |   |                                         |                                                                                                                                                                                                                                                                                                                                                                                                                                                                                                                                                                                                                                                                                                                                                                                                                                                                                                                                                                                                                                                                                                                                                                                                                                                                                                                                                                                                                                                                                                                                                                                                                                                                                                                                                                    |
|------------------|-----------------------------|----------------|---|-----------------------------------------|--------------------------------------------------------------------------------------------------------------------------------------------------------------------------------------------------------------------------------------------------------------------------------------------------------------------------------------------------------------------------------------------------------------------------------------------------------------------------------------------------------------------------------------------------------------------------------------------------------------------------------------------------------------------------------------------------------------------------------------------------------------------------------------------------------------------------------------------------------------------------------------------------------------------------------------------------------------------------------------------------------------------------------------------------------------------------------------------------------------------------------------------------------------------------------------------------------------------------------------------------------------------------------------------------------------------------------------------------------------------------------------------------------------------------------------------------------------------------------------------------------------------------------------------------------------------------------------------------------------------------------------------------------------------------------------------------------------------------------------------------------------------|
|                  |                             | A2, A3,<br>A14 |   |                                         | CTAAAAGAAATATCAAAGTATCAGACAGGTTTATGGTATTTATCTGATCATG<br>GCGAATCAACCGGAGAACATGGTTTATATTTACATGGTTCACCTTATGCAA<br>TCGCACCGAGCCAACAAACACATGTACCAATGATTATGTGGTTCTCTGAAA<br>GTTGGAAACAACATAATCTTGCTCAAGTGAATTGTTTAAGCCAACAACTA<br>AACAAAAGTTAAGTCAGGATAATTTATTCCCAAGTTTGTTAAGTTTGCTGGA<br>TGTA AAAACTCAGGTAGTAAATAACAACTTGATATGTTGAGCCAATGTAA<br>ATAA<br>ATGAATACTCTTGCTGAACGACTTAGGTATGCCATGGAAGTTTTGCCACCT<br>AAAAAGATTAAGGTGTTGAGCTTGCTCGTGCAAGTAGGAGTTAAACCTCCT<br>TCTGTGAGTGATTGGCTGTCTGGAAAATCCAAAACAATGGAAGGTGAAAA<br>TTTATTACGTGCCTCAAATTTTTGAATGTAAATCCTTCATGGCTTGCATCT<br>GGCACGGGAGAGATTCAATCAAGCACGAGAGATAAATTTAAACAACCTGGA<br>TATCGAAGAGTTCAAAAAGAAATACAACATTAGTGATAGTGATGAAGCTCT<br>TTTATTTTCAACAATTATCGAAAAACCGTTTATCCCATCATCTAAGCGTTGG<br>GTTCTGTTAAGGCTTACTCCAAGATGGGCATGGATGGCTATTTACAGAT<br>ATGGGTTATGAAGGCAATGCTGGAGATGGGTATGTTCCAACCTCACTCAGC<br>AGGACCAAGAGCCTATGGCATTAAAGGCACTGGCGACTCAATGTTTCCAG<br>CAATTCGTAATGGCTGGTATGTTGTATGCGACCCTGATGCAGAGCTTGTG<br>CCGAATGAGTTTGTTCAGGTGTGCTTGAAGGATGGAAGATGCACAATTAA<br>AGAATTTGTGCGCATCAATGGTGGGGTTTTAAGTTTGCTTTCTGTGAATGG<br>TGGTGAGCGATTTTTCTTTGAAATGGACGAGGTTGAAAGTATTACCGCTAT<br>TACAGATATCGTGCCGCCAAGTCAGCACAGACAAGAACATCCTTATTCGC<br>ATTAA<br>ATGCTGGCTGAACGCGGAGTGAATGTCGATCACTCCACGATTTACCGCTG<br>GGTTCAGCGTTATGCGCCTGAAATGGAAAAACGGCTGCGCTGGTACTGG<br>CGTAACCCTTCCGATCTTTGCCCGTGGCACATGGATGAAACCTACGTGAA<br>GGTCAATGGCCGCTGGGCGTATCTGTACCGGGCCGTCGACAGCCGGGG<br>CCGCACTGTGATTTTTATCTCTCCTCCCGTCGTAACAGCAAAGCTGCATA<br>CCGGTTTCTGGTAAAATCCTCAACAACGTGAAGAAGTGGCAGATCCCGC<br>GATTCATCAACACGGATAAAGCGCCCGCTATGGTCGCGCGCTTGCTCTG<br>CTCAAACGCGAAGGCCGGTGCCCGTCTGACGTTGAACACCGACAGATTA<br>AGTACCGGAACAACGTGATTGAATGCGATCATGGCAAACCTGAAACGGATA<br>ATCAACGCCACGCTGGGATTTAAATCCATGAAGACGGCTTACGCCACCAT |
| <i>group_107</i> | hypothetical protein        | L6             | K | Peptidase S24-like                      |                                                                                                                                                                                                                                                                                                                                                                                                                                                                                                                                                                                                                                                                                                                                                                                                                                                                                                                                                                                                                                                                                                                                                                                                                                                                                                                                                                                                                                                                                                                                                                                                                                                                                                                                                                    |
|                  |                             | A3             |   |                                         |                                                                                                                                                                                                                                                                                                                                                                                                                                                                                                                                                                                                                                                                                                                                                                                                                                                                                                                                                                                                                                                                                                                                                                                                                                                                                                                                                                                                                                                                                                                                                                                                                                                                                                                                                                    |
| <i>group_11</i>  | IS6 family transposase IS15 | L6, L9, L10    | L | Transposase and inactivated derivatives |                                                                                                                                                                                                                                                                                                                                                                                                                                                                                                                                                                                                                                                                                                                                                                                                                                                                                                                                                                                                                                                                                                                                                                                                                                                                                                                                                                                                                                                                                                                                                                                                                                                                                                                                                                    |

|                   |                                  |                  |   |                                         |                                                                                                                                                                                                                                                                                                                                                                                                                                                                                                                                                                                                                                                                                                                                                                                                                                                                         |
|-------------------|----------------------------------|------------------|---|-----------------------------------------|-------------------------------------------------------------------------------------------------------------------------------------------------------------------------------------------------------------------------------------------------------------------------------------------------------------------------------------------------------------------------------------------------------------------------------------------------------------------------------------------------------------------------------------------------------------------------------------------------------------------------------------------------------------------------------------------------------------------------------------------------------------------------------------------------------------------------------------------------------------------------|
|                   |                                  |                  |   |                                         | CAAAGGTATTGAGGTGATGCGTGCACTACGCAAAGGCCAGGCCTCAGCA<br>TTTTATTATGGTGATCCCCTGGGCGAAATGCGCCTGGTAAGCAGAGTTTTT<br>GAAATGTAA                                                                                                                                                                                                                                                                                                                                                                                                                                                                                                                                                                                                                                                                                                                                                   |
|                   |                                  | A1               |   |                                         | ATGAGTACTCTTCAAGAGCGAATGTCTTTAGCTATAAAGCACTATGAATCT<br>GTGACAGGTAAAAGATTCAAAAATACTGAGCTGGCTAGATTTGCAGGCGT<br>GAGCAGGGCTAATGTTGGGTTGTGGGTAAATGGCCCAACCCAAGAGTTG<br>GAGGGGTCAAATTTAGTTAAAGCGGCTGAGTTTTTTAGGAGTTTCTAAAGAT<br>TGGCTAGCTGGACAAGGTAATAAAATGATTGCCACACAGCTGGATGGTGG<br>TGGTGACAATTAATGTTCTTGATATTGAAGCCTTTAAGCAGAAGTACAA<br>CATTCCAGATAGTGAAGATGCTGTTAAGTTTGTTCAAACATCAGATAAACC<br>ATTCCCTATTCAAAAAGATACGTTCCCGTCAAAGCTTATTCAAAGATGGG<br>TATGGATGGGTATTTACAGATATGGGATACGATGGAATGCTGGAGATG<br>GGTATGTTCCAACACTCACTCAGCAGGACCAAGAGCCTATGGTATTAAGGC<br>ACTGGCGACTCAATGTTTCCAGCTATCCGTAATGGATGGTATGTGGTTTTGT<br>GATCCAGATGCGGAACTCGTGCCGAATGAGTTTGTTCAAGGATGCTTGAA<br>GGATGGAAGATGCACAATTAAGAATTTGTTGGCATAAATGGCGGGGTTT<br>TAAGCTTGCTTTCTGTGAATGGTGGTGAGCGATTTTTCTTTGAAATGGATG<br>AGGTAGAAAGCATTACAGCTATTACTGACATCGTACCACCAAGTCAGCAC<br>AGACAAGAACATCCTTATTCGCATTA |
| <i>group_110</i>  | hypothetical protein             | L10              | K | Peptidase S24-like                      |                                                                                                                                                                                                                                                                                                                                                                                                                                                                                                                                                                                                                                                                                                                                                                                                                                                                         |
|                   |                                  | A2, A3, A14      |   |                                         | ATGAATATGCCAGTACAACAACACATTTTACAAGCGGTGCGATTGGTCTAGA<br>TTTAGTTTTGAAGAGTGGTGTGCGCCAGCTTGGAGCTTGGCTAAACGGCGA<br>TACCGAAACAATGGTCAAATTTGTTAAGACGATGCCAACAAAACGCATCAC<br>TCAAAAACAAGAGAAAAATTAATAGCTATGTATATGAGCGATGAAAATCT<br>AAAAGATCGTTTATGCATTCGCCGTAAGGGTACTTGCTGTGAGTTAAATGA<br>CAATGAGGCACGTGCAATCCATAGATTGATTATTGATATTAATTAATTGAA<br>GACCATATTTTACAAGAATGGATCTCAGCAATTTGGTCACATCATGTTATG<br>GGCAATTCATTACGTGATATTGCTCAAAGTAATGACACTTCAGTTAATCAA<br>ATCAGACAGGATTTAAAATGTGGTATGGCTTATATCAAAGTCGAAATCCG<br>CATTTTCAGATTTGAACTTTTTGAAAAACCGCTTGA                                                                                                                                                                                                                                                                                                                      |
| <i>group_113</i>  | hypothetical protein             | L7, L9           | / | hypothetical protein                    |                                                                                                                                                                                                                                                                                                                                                                                                                                                                                                                                                                                                                                                                                                                                                                                                                                                                         |
| <i>group_1298</i> | <i>deaD</i><br>ATP-dependent RNA | A1, A2<br>C2, C4 | L | Belongs to the DEAD box helicase family | ATGAGCAAACCTTTTGCCGAATTTCTTTGCACGAAACCTTACAACAAGCT<br>CTTGAAGGTTTAGGTTTTACTAACCCAACTCCTGTGCAAGAACAATCTATT<br>CCTGCTGCTTTAGAAGGTAAAGACCTTCTTGTCTTAGCCAGACTGGTTCT<br>GGTAAAACCTGCTGCATTCTTATTACCGACATTACATAATTTGGCAGGTCAA                                                                                                                                                                                                                                                                                                                                                                                                                                                                                                                                                                                                                                                 |

helicas  
e  
DeaD

GATACTTTCGTTCCGTTCAAAGAACGTATGAAAGCAGTGA CT CAGCCTAG  
CATTTTAGTTTTATGCCCAACACGTGAATTGGCTCAACAAGTTAGCCAAGA  
CGCAATTGCTTTTGTACGTCACATGAAAGGTGTTTCGTATTGCTGCAATTAT  
GGTGGTATGCCTTTTGGTAAACAAATTCAACAGCTTAAAGGTGCTCAAGT  
TG TAGTTGCGACTCCAGGTCGTTTATTAGACTTAGTTAACCGTCGTCAATT  
AAAGCTAGACAAAGTTGATGCTTTAATCGTGGACGAAGCTGACCGTATGTT  
AGACCTTGGTTTCTCTGAAGACTTAGAAGCGATCAGTGA CT TGGCTGCCA  
ATCGTGGTCAAACGTTAATGTTCTCTGCAACTTTTGTGACCGTATTATTC  
GTCTTGCTGAGCGCATGATGAATGAACCTGAGCGTATTGCAATTGAAACT  
GGTCACAGCACCAATACTGACATCACCCAACTTTACACTGGACAGATGG  
TTTCGAACACAAGAAGAACTTCTGACTCACTGGTTGGCTGATGAAACGCT  
TGACCAAGCTGTTGTATTGCGGAGCACACAAGAAGATACAGATATGTTGG  
CTGAAGA ACTTGCAGAAGCAGGTC ACTCAGTTGTTGCACTTCACGGTGCA  
ATGCCGCAAACAGTTCGTAACCGTCGTTTACGTAGTATCCGTGAAGGCCG  
TGCGAAAATCTTAGTTGCTACTGACGTTGCTGCACGTGGTCTTGACGTT  
CAACAATTTACACGTTATTA ACTTCGGCTTACCAATGAAGCATGAAGATT  
ATGTACACCGTATTGGTCGTACAGGTCGTGCTGGTCGTACAGGTCAAGCG  
ATTACTTTAGCGACTTATCGTGAACGCGGTA AAATCCGTGCGCTTGAAGA  
CTACTTAGAAGCTCGTTTAAATGTTTCTGAAATTGAAGGTTTAGAGCCATC  
TCCACCTCCAGCTCGTCCACGTCGTGAAGGTGGTCGTGGTGGTAACGGT  
GGCCGTGATGGTCGTGTTTTGAGGGTGAAGGTA ACTTCAAACGTCGTGA  
AGGTGGTCGTGATGATCGTCCACGTCGTAGCTTCGATGATAAGCCTCGTG  
GTGAGCGTCCTGCTTTTCGGTGGCGAAGATCGTCCACGTCGCGAGTTCAA  
CTCAGATCGTCCACGTCGTGAAGGTGGTTTTGAAGACCGTCCAAAACGTA  
GCTTCGGTGGTGAAGATCGTCCGCGTCGCGAGTTCAACTCAGATCGTCCA  
CGCCGTGAAGGTGGTTTTAACGATAAGCCTCGTTTTGATTCAAATGATGAC  
AATCGTGGTAACCGCGTAGACTATAAACACGTCGTGAAAACGGTTTTCGG  
TGACCGTCCACAACGTAGCTTTGGTGGTGAAGATCGTCCACGTCGTGAAG  
GCGTTTTTGGTATCGTCCAAAACGTAGCTTTGGTGGTGAAGAACGTCCA  
CGTCGCGCAGTTGCGGAAGAACACTTTAATCAAGAATCTCGTGGTGAGCG  
CCGTCGTAAATTCGACCGTTAA  
ATGAGCAAACCTTTTGGCGAATTTCTTTGCACGAAACCTTACAACAAGCT  
CTTGAAGGTTTAGGTTTTACTAACCCAACTCCTGTGCAAGAACAATCTATT

*group\_*  
1316      *deaD*      ATP-  
depen      A1, A3,  
A14      L      Belongs to the DEAD box helicase family

dent  
RNA  
helicas  
e  
DeaD

C6

group\_  
1327

*hfq*

RNA-  
bindin

A1, A2,  
A14

/

hypothetical protein

CCTGCTGCTTTAGAAGGTAAAGACCTTCTTGTTTCTAGCCAGACTGGTTCT  
GGTAAAAGTCTGCTGCATTCTTATTACCGACATTACATAATTTGGCAGGTCAA  
GATACTTTCGTTCCGTTCAAAGAACGTATGAAAGCAGTGACTCAGCCTAG  
CATTTTAGTTTTATGCCAACACGTGAATTGGCTCAACAAGTTAGCCAAGA  
CGCAATTGCTTTTGTACGTCACATGAAAGGTGTTTCGTATTGCTGCAATTAT  
GGGTGGTATGCCTTTTGGTAAACAAATTCAACAGCTTAAAGGTGCTCAAGT  
TG TAGTTGCGACTCCAGGTCGTTTATTAGACTTAGTTAACCGTCGTC AATT  
AAAGCTAGACAAAGTTGATGCTTTAATCGTGGACGAAGCTGACCGTATGTT  
AGACCTTGGTTTCTCTGAAGACTTAGAAGCGATCAGTGACTTGGCTGCGA  
ATCGTGGTCAAACGTTAATGTTCTCTGCAACTTTTGTGACCGTATTATTC  
GTCTTGCTGAGCGCATGATGAATGAACCTGAGCGTATTGCAATTGAAACT  
GGTCACAGCACCAATACTGACATCACCCAACTTTACTGGACAGATGG  
TTTCGAACACAAGAAGAACTTCTGACTCACTGGTTGGCTGATGAAACGCT  
TGACCAAGCTGTTGTATTTCGCGAGCACACAAGAAGATACAGATATGTTGG  
CTGAAGA ACTTGCAGAAGCAGGTC ACTCAGTTGTTGCACTTCACGGTGCA  
ATGCCGCAAACAGTTCGTAACCGTCGTTTACGTAGTATCCGTGAAGGCCG  
TGCGAAAATCTTAGTTGCTACTGACGTTGCTGCACGTGGTCTTGACGTTT  
CAACAATTTACACGTTATTA ACTTCGGCTTACCAATGAAGCATGAAGATT  
ATGTACACCGTATTGGTCGTACAGGTCGTGCTGGTCGTACAGGTCAAGCG  
ATTACTTTAGCGACTTATCGTGAACGCGGTAAAATCCGTGCGCTTGAAGA  
CTACTTAGAAGCTCGTTTAAATGTTTCTGAAATTGAAGTTTAGAGCCATC  
TCCACCTCCAGCTCGTCCACGTCGTGAAGGTGGTCGTGGTGGTAACGGT  
GGCCGTGATGGTCGTGTTTTCGAGGGTGAAGGTA ACTTCAAACGTCGTGA  
AGGTGGTCGTGATGATCGTCCACGTCGTAGCTTCGATGATAAGCCTCGTG  
GTGAGCGTCCTGCTTTTCGGTGGCGAAGATCGTCCACGTCGCGAGTTCAA  
CTCAGATCGTCCACGCCGTGAAGGTGGTTTTAACGATAAGCCTCGTTTTG  
ATTCAAATGATGACAATCGTGGTAACCGCGTAGACTATAAACCACGTCGT  
GAAAACGGTTTTCGGTGACCGTCCACAACGTAGCTTTGGTGGTGAAGATCG  
TCCACGTCGTGAAGGCGGTTTTGGTGATCGTCCAAAACGTAGCTTTGGTG  
GTGAAGAACGTCCACGTCGCGCAGTTTCGCGAAGAACA CTTTAATCAAGAA  
TCTCGTGGTGAGCGCCGTCGTAAATTCGACCGTTAA  
ATGTCTAAAGGTCAA ACTTTACAAGATCCGTTCTTAAATTCTCTCCGTAAAG  
AACGCATCCCAGTTTCTATTTTCTTGTTAACGGTATTAATTACAAGGTCA

|                  |                                      |                          |   |                                         |                                                                                                                                                                                                                                                                                                                                                                                                                                                                                                                                                                                                                                                                                                                                                                                           |
|------------------|--------------------------------------|--------------------------|---|-----------------------------------------|-------------------------------------------------------------------------------------------------------------------------------------------------------------------------------------------------------------------------------------------------------------------------------------------------------------------------------------------------------------------------------------------------------------------------------------------------------------------------------------------------------------------------------------------------------------------------------------------------------------------------------------------------------------------------------------------------------------------------------------------------------------------------------------------|
|                  | g<br>protein<br>Hfq                  | C6                       |   |                                         | TATTGAATCTTTTGACCAATATGTTGTTTTATTA AAAAATACTGTAAGTCAAA<br>TGGTTTACAAACACGCAATTTCTACAGTTGTTCCAGCTCGCAACCCACGTC<br>CAGCAGGTGCACAAGGTGCAGGTTTCCAGCTCAGGGTGGTAGTCAAGG<br>TGGCTTCGGTGGTCAAGGCGGCTTTGGTGGTCAAGGCGGCTTCGGCGGA<br>CATCAAGGCGGTTTTGATAACGATTCTAAATTTGAAGATGGTCAAGACGAC<br>GAAAACAATCGTTAA                                                                                                                                                                                                                                                                                                                                                                                                                                                                                          |
| <i>group_174</i> | hypothetical<br>protein              | A1, A2,<br>A14<br>L6, L8 | S | AAA domain                              | ATGCGACAAGCAATGTTAATGAGAGCTAAAGCATTGAATTGCACGTTTGT<br>AAACAACGTGGCACTTGGATTAGTCCCCCTGAATTTAACGGCATCTCAGAT<br>CAACAAAGAGACGAACCTTCAAACCTTTATTGCTGAACGTGGCCTAGACGTA<br>AAAACAGTATGTGAGCACTTAGGTATCGATGCCCTTATTCAAATTGAAGCA<br>GCAAACTTAAGGCAGTTAAACAAGACATTGAAACATTAGCTAAAACGGG<br>GATGACAGCATGA                                                                                                                                                                                                                                                                                                                                                                                                                                                                                            |
|                  |                                      | A2, A3,<br>A14           |   |                                         | ATGAACCCATTCAAAGGCCGGCATTTCAGCGTGACATCATTCTGTGGGC<br>CGTACGCTGGTACTGCAAATACGGCATCAGTTACCGTGAGCTGCAGGAGA<br>TGCTGGCTGAACGCGGAGTGAATGTCGATCACTCCACGATTTACCGCTGG<br>GTTTCAGCGTTATGCGCCTGAAATGGAAAAACGGCTGCGCTGGTACTGGC<br>GTAACCCTTCCGATCTTTGCCCGTGGCACATGGATGAAACCTACGTGAAG<br>GTCAATGGCCGCTGGGCGTATCTGTACCGGGCCGTCGACAGCCGGGGC<br>CGCACTGTCGATTTTTATCTCTCCTCCCGTCGTAACAGCAAAGCTGCATAC<br>CGGTTTCTGGGTAAAATCCTCAACAACGTGAAGAAGTGGCAGATCCCGCG<br>ATTCATCAACACGGATAAAGCGCCCGCCTATGGTCGCGCGCTTGCTCTGC<br>TCAAACGCGAAGGCCGGTGCCCGTCTGACGTTGAACACCGACAGATTAA<br>GTACCGGAACAACGTGATTGAATGCGATCATGGCAAACCTGAAACGGATAA<br>TCAACGCCACGCTGGGATTTAAATCCATGAAGACGGCTTACGCCACCATC<br>AAAGGTATTGAGGTGATGCGTGCCTACGCAAAGGCCAGGCCTCAGCATT<br>TTATTATGGTGATCCCCTGGGCGAAATGCGCCTGGTAAGCAGAGTTTTTG<br>AAATGTAA |
| <i>group_18</i>  | IS6<br>family<br>transposase<br>IS15 | L6, L7,<br>L8, L10       | L | Transposase and inactivated derivatives | ATGAACCCATTCAAAGGCCGGCATTTCAGCGTGACATCATTCTGTGGGC<br>CGTACGCTGGTACTGCAAATACGGCATCAGTTACCGTGAGCTGCAGGAGA<br>TGCTGGCTGAACGCGGAGTGAATGTCGATCACTCCACGATTTACCGCTGG<br>GTTTCAGCGTTATGCGCCTGAAATGGAAAAACGGCTGCGCTGGTACTGGC<br>GTAACCCTTCCGATCTTTGCCCGTGGCACATGGATGAAACCTACGTGAAG<br>GTCAATGGCCGCTGGGCGTATCTGTACCGGGCCGTCGACAGCCGGGGC<br>CGCACTGTCGATTTTTATCTCTCCTCCCGTCGTAACAGCAAAGCTGCATAC<br>CGGTTTCTGGGTAAAATCCTCAACAACGTGAAGAAGTGGCAGATCCCGCG<br>ATTCATCAACACGGATAAAGCGCCCGCCTATGGTCGCGCGCTTGCTCTGC<br>TCAAACGCGAAGGCCGGTGCCCGTCTGACGTTGAACACCGACAGATTAA<br>GTACCGGAACAACGTGATTGAATGCGATCATGGCAAACCTGAAACGGATAA<br>TCAACGCCACGCTGGGATTTAAATCCATGAAGACGGCTTACGCCACCATC<br>AAAGGTATTGAGGTGATGCGTGCCTACGCAAAGGCCAGGCCTCAGCATT<br>TTATTATGGTGATCCCCTGGGCGAAATGCGCCTGGTAAGCAGAGTTTTTG<br>AAATGTAA |
| <i>group_20</i>  | IS6<br>family<br>transposase<br>IS26 | C2<br>L7, L8,<br>L9      | L | Transposase IS66 family                 | ATGAACCCATTCAAAGGCCGGCATTTCAGCGTGACATCATTCTGTGGGC<br>CGTACGCTGGTACTGCAAATACGGCATCAGTTACCGTGAGCTGCAGGAGA<br>TGCTGGCTGAACGCGGAGTGAATGTCGATCACTCCACGATTTACCGCTGG<br>GTTTCAGCGTTATGCGCCTGAAATGGAAAAACGGCTGCGCTGGTACTGGC<br>GTAACCCTTCCGATCTTTGCCCGTGGCACATGGATGAAACCTACGTGAAG<br>GTCAATGGCCGCTGGGCGTATCTGTACCGGGCCGTCGACAGCCGGGGC                                                                                                                                                                                                                                                                                                                                                                                                                                                             |

group\_  
21

Alpha-  
ketogl  
utaric  
semial  
dehyd  
e  
dehydr  
ogena  
se

A2, A3,  
A14

L7, L9

C

Aldehyde dehydrogenase family

CGCACTGTCGATTTTTATCTCTCCTCCCGTCGTAACAGCAAAGCTGCATAC  
CGGTTTCTGGGTAAAATCCTCAACAACGTGAAGAAGTGGCAGATCCCGCG  
ATTCATCAACACGGATAAAGCGCCCGCCTATGGTCGCGCGCTTGCTCTGC  
TCAAACGCGAAGGCCGGTGCCCGTCTGACGTTGAACACCGACAGATTAA  
GTACCGGAACAACGTGATTGAATGCGATCATGGCAAACCTGAAACGGATAA  
TCGGCGCCACGCTGGGATTTAAATCCATGAAGACGGCTTACGCCACCATC  
AAAGGTATTGAGGTGATGCGTGCCTACGCAAAGGCCAGGCCTCAGCATT  
TTATTATGGTGATCCCCTGGGCGAAATGCGCCTGGTAAGCAGAGTTTTTG  
AAATGTAA

ATGACCATTATCGGACACAACCTTTATTGGTGGTTCACGCAGCGCACAAAGG  
TACAACCTTATTA AAAAGTATTCAAGCTACGACTGGTGAAGCTTTGCCTTA  
TGAGTTTCACCATGCAACCGAGCAAGAGATTAATCAGGCCTGTGAAGCAG  
CCAGTCAAGCCTTTAAGACTTACCGCCATACCACACCTGAACAGCGTGCT  
GTTTTTTTAGAAAATATTGCAGATGAACTCGATGCTTTGGGTACCGATTTTC  
TAGAAATTGTCTCACAGGAAACTGCTTTGCCACTTGACGTTTACAAGGTG  
AACGTGCCCGGACCAGTGGGCAAATGCGCCTGTTTGCTAAAGTGCTGCG  
CCGTGGTGATTTTTTAGGTGCCCGTATTGATACCGCTTTGCCTGAGCGCC  
AGCCTTTACCTCGCCCAGACTTGCGTCAGATTA AAAATCGGTGTAGGCCCT  
GTTGCAGTCTTTGGGGCAAGTAACTTTCCTTTAGCATTCTCAACTGCGGGT  
GGTGACACTGCTTCGGCACTGGCAGCAGTTGCTCTGTAGTGGTGAAG  
CCCATAGTGGACACATGGCCACAGCAGACTTTGTAGCGCAGGCAATTGAA  
CGTGCGGTAGAAAATCAAATATGCCAAAAGGGGTGTTTAATATGATCTAC  
GGTAATGGCGTGGGTGAACCTTTAGTGAAGCATCCTTTAATTCAGGCTGT  
GGGTTTTACCGTTTCATTGCGTGGTGGTTCGTGCTTTATGTGATATGGCCG  
CAGCCCGTCCACAACCGATTCCAGTCTTTGCTGAAATGAGCAGTATTAAC  
CCGATGTTGATGTTGCCCGAAGCCTTAAAAAACCGTGGTGACAAAATTGC  
ACAGGACTTGGCTGATTCAGTGGTTTTAGGCTGTGGTCAGTTCTGTACCA  
ATCCGGGTTTAATCTTGGGTATTAATCAGCTGAATTTAGCCAGCTTATTA  
GCAACCTGACTGAAATTATGGGGGCTAAGCCTGCACAGACTATGCTCAAT  
GCCGGCACCTTAAAAAGTTATACCGCTGGTCTTGAGCACTTAACCGAGCA  
TCAAGGTATTAAGCATTGCGCAGGTCAAACCTCAACAAGGCAATCAGGCTC  
AGCCACAACCTGTTTAAAGCTGATGTTGAGCTTTTACTGGCAGGTGACCAG  
CTTTTACAGGAAGAAATCTTTGGGCCAACACAGTCATCATTGAAGTTGAA

|                 |                                                  |                           |    |   |                                      |                                                                                                                                                                                                                                                                                                                                                                                                                                                                                                                                                                                                                                                                                                                                                                                                                                                                                                                                                                                                                                                                                                                                                                                                                                                                                                                                                                                                                                                                                                                                                                                                                                                                                                                                                                                                                                                                                          |
|-----------------|--------------------------------------------------|---------------------------|----|---|--------------------------------------|------------------------------------------------------------------------------------------------------------------------------------------------------------------------------------------------------------------------------------------------------------------------------------------------------------------------------------------------------------------------------------------------------------------------------------------------------------------------------------------------------------------------------------------------------------------------------------------------------------------------------------------------------------------------------------------------------------------------------------------------------------------------------------------------------------------------------------------------------------------------------------------------------------------------------------------------------------------------------------------------------------------------------------------------------------------------------------------------------------------------------------------------------------------------------------------------------------------------------------------------------------------------------------------------------------------------------------------------------------------------------------------------------------------------------------------------------------------------------------------------------------------------------------------------------------------------------------------------------------------------------------------------------------------------------------------------------------------------------------------------------------------------------------------------------------------------------------------------------------------------------------------|
| <i>group_22</i> | Alpha-ketoglutaric semialdehyde dehydratase      | L6, L10                   | A1 | C | Aldehyde dehydrogenase family        | <p>GATAAAGCCCAACTCATTGAGGCATTACAAAGCATGAATGGGCAACTGAC<br/> TGCGACTTTAATTGCCGATGAGGCTGACTTAACCGAGTTTGCAGAGGTAG<br/> TTCCTGTATTAGAAGAAAAAGCTGGGCGATTACTTATAAATGGCTATCCAA<br/> CAGGTGTTGAGGTGTGTGATGCCATGGTACACGGCGGGCCATACCCAGC<br/> CACTTCAGATGCACGAGGTA CTTGAGTTGGAACCTTGGCCATTGACCGTT<br/> ACTTGCGCCCTGTGTGTTACCAGAACTATCCGCAAAGTTTATTGCCGGAA<br/> GCCTTAAAAGACAGCAACCCGTTGCAGATTTAAGATTGGTGAATGGTGA<br/> GATGACCAGAGAAGCGATCTAA</p> <p>GTGGTCAAAGCCCATAGTGGACACATGGCCACAGCAGACTTTGTAGCGC<br/> AGGCAATTGAACGTGGCGTAGAAAAATCAAATATGCCAAAAGGTGTGTTTA<br/> ATATGATCTACGGTAATGGCGTGGGTGAACCTTTAGTGAAGCATCCTTTAA<br/> TTCAGGCTGTGGGTTTTACCGGTTTCATTGCGTGGTGGTTCGTCGTTTATGT<br/> GATATGGCCGCAGCCCGTCCACAACCGATTCCAGTCTTTGCTGAAATGAG<br/> CAGTATTAACCCGATGTTGATGTTGCCGAAGCCTTAAAAACCGTGGTG<br/> ACAAAATTGCACAGGACTTGGCTGATTCAGTGGTTTTAGGCTGTGGTCAG<br/> TTCTGTACCAATCCGGGTTTAATCTTGGGTATTAATCAGCTGAATTTAGC<br/> CAGCTTATTAGCAACCTGACTGAAATTATGGGGGCTAAGCCTGCACAGAC<br/> TATGCTCAATGCCGGCACCTTAAAAAGTTATACCGCTGGTCTTGAGCACTT<br/> AACCGAGCATCAAGGTATTAAGCATTTGGCAGGTCAAACCAACAAGGCA<br/> ATCAGGCTCAGCCACAACCTGTTTAAAGCTGATGTTGAGCTTTTACTGGCAG<br/> GTGACCAGCTTTTACAGGAAGAAATCTTTGGGCCAACACAGTCATCATT<br/> GAAGTTGAAGATAAAGCCCAACTCATTGAGGCATTACAAAGCATGAATGG<br/> GCAACTGACTGCGACTTTAATTGCCGATGAGGCTGACTTAACCGAGTTTG<br/> CAGAGGTAGTTCCTGTATTAGAAGAAAAAGCTGGGCGATTACTTATAAATG<br/> GCTATCCAACAGGTGTTGAGGTGTGTGATGCCATGGTACACGGCGGGCC<br/> ATACCCAGCCACTTCAGATGCACGAGGTA CTTGAGTTGGAACCTTGGCCA<br/> TTGACCGTTACTTGCGCCCTGTGTGTTACCAGAACTATCCGCAAAGTTTAT<br/> TGCCGGAAGCCTTAAAAGACAGCAACCCGTTGCAGATTTTAAAGATTGGTG<br/> AATGGTGAAGATGACCAGAGAAGCGATCTAA</p> <p>ATGGCACTTAATGTTTTTAAATTCAAAAAATATGCAAGGATGTTACACTAT<br/> TAAATTTAATTTGCTTTTATCTATCTGGCTAGGTTTATTTCTGAATATAGGT<br/> TTTTTAAAAAATCCATCAACTTACACCTTATAATGGTATTAAGTCAGTTCT<br/> TTTCTTAGGGGCGACATTAGTTATTTAATAGCGGCATATAATTTAATTTTT</p> |
| <i>group_30</i> | <i>eptA_2</i><br>Phosphoenolpyruvate carboxylase | L6, L8, L9, L10<br>C2, C6 |    | S | Domain of unknown function (DUF1705) |                                                                                                                                                                                                                                                                                                                                                                                                                                                                                                                                                                                                                                                                                                                                                                                                                                                                                                                                                                                                                                                                                                                                                                                                                                                                                                                                                                                                                                                                                                                                                                                                                                                                                                                                                                                                                                                                                          |

transfe  
rase  
EptA

CAATTAATAAATTGGAAATGGACTGCCAAAATCTTTGCAATTTTATTGATAT  
TTATTGGTGGCTTTAGCTCTTATTTTGTAACACATTGGGTGTCATTATTTTC  
ACCCGACCAAATTCAAAATATGGTGCAGACCGATGTTTCGGAATTTACCGA  
TCTAATCTCTTTACGCTTTGTTTTATGGACAGTTTTTTTTGTTATTTGCCCA  
TTTTTTAATTACTCAAGTTAAATTTAAACAAGAAAAAGCATCACGGTTGTT  
ATTGAAGAAAGTATTCTCACTGGTAGCTTCATTTGCAGTGGTCGGTGTTTT  
ACTTTTTACTTACTATGTCGATTTTCGCTGCAATATTTTCGTGAGCATCGTGAT  
TTAAAAGGGATGATTTACCGCAAATAGTATTTTCATCGCTTATGTCTTACT  
ATCATAAGAAGGCTCCGAAGAAAAATCTGCCTCTTGTGATATATGGACAAG  
ATGCTCATCAAGTTCAGCAAGTACAAAAGAACCTCCCTAAGTTAATGATAC  
TTGTTGTAGGTGAAACGGCACGTGCCGAAAGTTTCTCTCTAAATGGGTAT  
GCAAAAATACGAATCCGGAGCTTTCTAAACAAGATATTTCAACTTTTCG  
CAAGTGAGCTCATGCGGTACGGCGACAGCTGTTTCTGTGCCATGTATGTT  
CTCGGGTATGCCACGTGTAGATTATGATGAGCAATTAGCTAGTCACCGCG  
AAGGTTTATTAGATATTGCAAAACGTGCGGGTTACCAAGTGACTTGGATTG  
ATAATAACTCGGGTTGTAAAGGTGCATGTGATCGCGTTGAACAATACCAG  
ATTCCAGAAACTTAAAGAAAAAATGGTGTAAAGATGGCGAATGTTATGAT  
GACATTCTCATTGACAGCTTAAAGCAGTATTTGGCTACTATTGCCAAAGAT  
GATGATCGTCCGCGTTTTGATTGTTCTGCATCAAGTGGGTAGTCATGGACC  
TGCATATTACAAGCGTGCACCTGAGGCATATCAACCTTTTAAACCGACTTG  
TGATACTAATGCGATACAGGGCTGTTTCGCAAACCTGAATTGCTAAATAGTTA  
TGATAATACAATTGTATATACAGACCATGTATTAAGCCAAATGATTAATACT  
CTAAAAGAAATATCAAAGTATCAGACAGGTTTATGGTATTTATCTGATCATG  
GCGAATCAACCGGAGAACATGGTTTATATTTACATGGTTCACCTTATGCAA  
TCGCACCGAGCCAACAAACACATGTACCAATGATTATGTGGTTCTCTGAAA  
GTTGGAAACAACATAATCTTGCTCAAGTGAATTGTTTAAAGCCAACAAACTA  
AACAAAAGTTAAGTCAGGATAATTTATTCCCAAGTTTGTAAAGTTTGTCTGGA  
TGTA AAAACTCAGGTAGTAAATAACAACTTGATATGTTGAGCCAATGTAA  
ATAA  
ATGGCTCTACCGATTACTGCTGACCAAACCTTTATTGGTTCAAGCAATT  
ATTGTGTACCTATACGCTGATCCGGGTTTAGGTAAATCATCAATGGGCTTT  
ACTGCGGAAAAAGCAATTTCTTTTGACTTTGACCGTGGTGCTCACCGTACT  
GGTGAATTACGTCGTGGTGGGTTGTACAGTTCAACAATGGAGTGATGT

group\_  
3194

hypoth  
etical  
protein

A3, A14  
L7, L8,  
L9, L10

S

AAA domain



|                       |                                                |                   |   |                        |                                                                                                                                                                                                                                                                                                                                                                                                                                                                                                                                                                                                                                                                                                                                                                                                                                                                                                                                                                                                                             |
|-----------------------|------------------------------------------------|-------------------|---|------------------------|-----------------------------------------------------------------------------------------------------------------------------------------------------------------------------------------------------------------------------------------------------------------------------------------------------------------------------------------------------------------------------------------------------------------------------------------------------------------------------------------------------------------------------------------------------------------------------------------------------------------------------------------------------------------------------------------------------------------------------------------------------------------------------------------------------------------------------------------------------------------------------------------------------------------------------------------------------------------------------------------------------------------------------|
|                       |                                                |                   |   |                        | TGCAAACCTTACTCCGCAGGACTTAGCACCATATAAAACCGTAGTCATTGA<br>TACCGTGGGTGCAATGCTTGAATGCATTAACCCACCTGTTACTTACGG<br>CAAATAACCGTCAAAAAGATGGTTCTTTAAAGTTAAAGGCTCAAGGATTAG<br>CGAACCAAACGTTCAAGCAATACATCAATACTTTGATCAGTTTAGGTAAG<br>ATGTTGTTTTATTGCACACGCATCAGAAGATCAAAACGGTGATCAAATTA<br>TTTACCGCCCAGATCTAGGTGGTAAAAACCGTAACGAGCTTTACCGTATC<br>GCAGATGTCATGGGTTATCTAACAACCTGTTACTACTGGTGAAGGTAATAA<br>GCCCCGCTTATTAATTTCAAACCTTCGCCTACACATCATGCGAAAACTCA<br>GGTGCTTTAGGCGGTGAAACCGGTGAAGTATGGGTACCTGATCTTAAAGC<br>ACACCCTACTTTCTTGGCTGACCTGATTACTCAAGCTAAAGATCACATTAA<br>CACCTTAACGCCTGCACAACCTTGCAGCAGCTAAAGCCCAAGAAGAGCTAG<br>AAAACCTGGAAACAAAGCTGTGAAGAAGCTGAGCATGCAGGTGACCTTAAT<br>CAATTAACCTGAGTCGCTTGATAAAGAACACATGTATTACCAGAACATGCGA<br>CAAGCAATGTTAATGAGAGCTAAAGCATTGAATTGCAGTTTGATAAACAA<br>CGTGGCACTTGGATTAGTCCCCCTGAATTTAACGGCATCTCAGATCAACA<br>AAGAGACGAACTTCAAACTTTATTGCTGAACGTGGCCTAGACGTAAAAAC<br>AGTATGTGAGCACTTAGGTATCGATGCCCTTATTCAAATTGAAGCAGCAAA<br>ACTTAAGGCAGTTAAACAAGACATTGAAACATTAGCTAAAACGGGGATGAC<br>AGCATGA |
|                       |                                                | A2, A3,<br>A14    |   |                        | ATGACACATCTCAATGAGTTATATCTTATCTTAAACAAATATCTAAAATGGA<br>ACAAGTCACATTTAAAGTGCTTTGCGCTCATCATGCTTGTGATTATTTTAAA<br>GCAAACATGTAATCTTTCTTCTGCATCTAAAGCCTTGCCCATCAAGTGCTT<br>ACCACAATCATTTTATCGACGTATGCAGCGCTTCTTTGCAGGTCAGTATTT<br>TGATTATCGTCAAATTTCTCAGTTGATTTTCAATATGTTTTATTGACCAA<br>GTGCAACTGACTTTAGATAGAACCAATTGGAAATGGGGAAAACGAAATATT<br>AATATCCTGATGCTCGCAATCGTTTATCGTGGAATAGCGATACCTATCCTT<br>TGGACATTGCTTAATAAACGTGGAAATTCAGATACGAAAGAGCGTATTGCT<br>TTGATTCAACGCTTTATAGCCATTTTGGTAAAGACCGTATTGTGAATGTGT<br>TCGCAGACAGAGAGTTTATCGGTGAGCAGTGGTTTACATGGTTAATTGAA<br>CAAGACATCAACTTCTGCATTCGTGTTAAAAAACTTCATTGTCACCAATCA<br>TTTAG                                                                                                                                                                                                                                                                                                                                                                                          |
| <i>group_</i><br>3291 | IS4<br>family<br>transp<br>osase<br>ISAb<br>33 | L6, L7,<br>L8, L9 | L | Transposase DDE domain |                                                                                                                                                                                                                                                                                                                                                                                                                                                                                                                                                                                                                                                                                                                                                                                                                                                                                                                                                                                                                             |
| <i>group_</i><br>3292 | IS4<br>family                                  | A1<br>L10         | L | Transposase DDE domain | ATGACACATCTCAATGAGTTATATCTTATCTTAAACAAATATCTAAAATGGA<br>ACAAGTCACATTTAAAGTGCTTTGCGCTCATCATGCTTGTGATTATTTTAAA                                                                                                                                                                                                                                                                                                                                                                                                                                                                                                                                                                                                                                                                                                                                                                                                                                                                                                                |

|                   |                      |                          |   |                                   |  |                                                                                                                                                                                                                                                                                                                                                                                                                                                                                                                                                                                                                                  |
|-------------------|----------------------|--------------------------|---|-----------------------------------|--|----------------------------------------------------------------------------------------------------------------------------------------------------------------------------------------------------------------------------------------------------------------------------------------------------------------------------------------------------------------------------------------------------------------------------------------------------------------------------------------------------------------------------------------------------------------------------------------------------------------------------------|
|                   | transposase ISAb33   |                          |   |                                   |  | GCAAACATGTAATCTTTCTTCTGCATCTAAAGCCTTGCCCATCAAGTGCTT<br>ACCACAATCATTTTATCGACGTATGCAGCGCTTCTTTGCAGGTCAGTATTT<br>TGATTATCGTCAAATTTCTCAGTTGATTTTCAATATGTTTTATTTCGACCAA<br>GTGCAACTGACTTTAGATAGAACCAATTGGAAATGGGGAAAACGAAATATT<br>AATATCCTGATGCTCGCAATCGTTTATCGTGGAATAGCGATACCTATCCTT<br>TGGACATTGCTTAATAAACGTGGAAATTCAGATACGAAAGAGCGTATTGCT<br>TTGATTCAACGCTTTATAGCCATTTTTGGTAAAGACCGTATTGTGAATGTGT<br>TCGCAGACAGAGAGTTTATCGGTGAGCAGTGGTTTACATGGTTAATTGAA<br>CAAGACATCAACTTCTGCATTCGTGTTAAAAAACTTCATTGTACCAATCA<br>TTTAG                                                                                                             |
| <i>group_3510</i> | hypothetical protein | L8<br>C2                 | / | hypothetical protein              |  | ATGAGCAAAGTATTAATGAATTGCCTGCAAGCGCTAGCAATAACGAATCG<br>CTCATATTGCAAGCACTTAACGCTAGCAATCAAAGACAAGTAGCAGAGAT<br>GATAAATGTTCGATGCAAGCATCCTTTACGGATGAAAACAGAAAAGAAATC<br>AAATGGATGGACTGAGATTGAGTTTATTAGCTTTTTGTTGACAGCCATTGG<br>TTTGAAGGTTGTGCAAGAAAGTGATGTGTATTGCTCACCTGAAATTGCAGA<br>AGCAACGCGAGTTTATTTAGCACATGCATTCACTTCACCTGAATACATGCG<br>GATTTTATTCAAATAA                                                                                                                                                                                                                                                                         |
| <i>group_40</i>   | hypothetical protein | A1<br>L6, L7,<br>L8, L10 | S | Bacterial collagen, middle region |  | GTGTCTGATTTAGTCGGTGGTGATATTCAAGGCGCTACTGAATCGGCTAC<br>CGGTATTCTCGATACGCTTATTACAAATGGTACAACCTGCAACTGGTTTAGT<br>AACTGAAATCATTGGTGGAGTAACAGGAATATTGGTGGCGTAACTGGCG<br>GAGATAGCCCACTAGGTTTAGTAACTGATTTACTTGGTGGTTTAACTGGTA<br>GCGTAGGCGGCGACAGTCCGCTTGGTGTAGTCACTGACCTTCTCGGTGG<br>TTTAACTGGTAGCGTAGGTGGCGACAGTCCGCTTGGCGTAGTCACTGATC<br>TGCTCGGCGGTTTAACTGGTGGTGTACTGGCGGTACAGACAACCCTATC<br>GGTATCGTAACGGATATCGTTGGAAGCTTAACGGGTGGTGTACTGGTGA<br>AGGCAGTTTAGATGTTATTTCTAATTTGCTAGGCGGATTGACTGGTGGTAG<br>CTTACTCGGTGGTGTAACTTCTACAGTATCTAGCGTAACAAATACAACGCA<br>TACGATCGTACCGACATCATTACTTACTGATAACTTCTAGAAAACCTCATT<br>AATACTGTTTAA |
| <i>group_53</i>   | hypothetical protein | A3, A14<br>C4, C6        | D | Phage-related minor tail protein  |  | ATGGCACAAGAATCCCGTTTGGTCATTGTTATTGATTGCGAAAATGCTGAA<br>CGTAATGCGCGTAATCTAGGCAATGAACTTGTTAGCATTGAACGTAAAGGT<br>GAATTTGCATCTAAGTCTATGGACAGCTTGTCTGTAGCCACCAGAGCTTTA<br>GCTGGACACATGGCTGGTTTATTAACAGTAGGTTTCAGCCATTTCAAAGATG                                                                                                                                                                                                                                                                                                                                                                                                        |

GATACATATACTGGATTACAAAATCGCCTTAAGTTAGTCACTAACAATCAA  
GTTGAACTAAATAAAGCAACGGAAGACACTTTCCGAATTGCTCAAAAACC  
TATTCAGCTTGGGATTCTGTGTTACAGGTTTACCAGCGTTTTAGTGATAAT  
GCCAAAACTTTAAACCTCACAATGGATGACACAGCACGTTTAACTGAAACA  
GTTTCTAAAGCTGTAGCAATTAGTGGTGCAAGCGCAGAAGCTGCTGATGC  
AGCTTTAGTTCAGTTCGGGCAGGCCTTGGCTAGTGAACGTTGCGTGGA  
GAAGAACCTAATTCTGTAATGGAGCAAACCCAGCACTAGCAAAGGCTATT  
GCTAAAGGTATGGGTATTACTGTAGGTGAATTACGTTCACTAGCAGCTGA  
AGGAAAATTACTTCACAAGAAATTGAAAAGCGCTTAGAAATGTAGAATC  
TGATGTTGATGCTCTTTTTGCTAAAACAGATATCACAATCGGGCAGTCTCT  
CACACTCCTAAACAACGAGATCACAAAATTTGTTGGCGAAGCAGGTAAGG  
GAAGTGGTGCGGCACAGGTATTAGCTGGATCAGTTCAAACCTTTGCAAGT  
AATTTAGATTTAATTGCTGATGGGGCTTTAGTAGTTGGTATTGGATATATCA  
CTCGTGCAATTTTATGAAGAGCGCTGCTATTAAGAGGGAATGGCTTCA  
ACTTTAGCGAGCCGCCAAGCATCTGTATTAATGCTCAAGCAGAATATGCA  
GAAGCTACCGCTGCTTTGAATGCAGCAAAGCTCATCTCGCGAATGTGCG  
AGCAACAAATGCAGAAACCAAGCTAAATTTGGCGCAACAGCGGCAGCAA  
CTCGATACGCACAAGCACAGGCAGCAGTAACTGCTGCTACAAATGCACAA  
ACAGCAGCTCAAATTAAGCTAAATACTGCAACTTCAATTGCAGGGAGACTA  
GCTAAAGGGGCGTTTGGATTAATTGGTGGGTGGGCTGGAGTTGCAACATT  
AGGAGTAATGGGATTAGCGGCAGCCTATTCTTATTTAATAATAAGGCAGA  
GGAGGCAAAGCAAAGCTTGCTGAACAAGCTAAAGTTGCTGAGAAAGCTG  
ATGAGGAGTTAAAAAATTAAGTGGCAATGATAAGGCTAAAGCAGTTAATG  
ATTTAACTACTGCTTTTAAATGCACAAAATAAAGCATTAGAGAAATCATCGCG  
TGCTGTAGGGTCTGCATTAATTGATATCGAGAATATGCACGAGGAAATA  
GGGAGGTTGAAAAATTTCCAAGAAGCGAGAATGGAATATCAGCTAT  
ACAGAAGCCATTGAACGTCTAAATAAAATTAAGTTGCCTACAGATCTATAT  
GAAAATCTGAAAAACAGGCTGCGCAGTATGATGACAATGCATCTAAAGC  
AAGTTTATCAGCTGAGAACTTAAATTATTAAGAGTTGAAGTGAACCTGG  
AGGTAATGAAGCACAAAATGCGGCAATTCAGCATCAAAAACAAGCGGATG  
CTTTAGGAAATACTGCTACTGAAGCAGAAAAGGCAACTAAGGCTTTGCAA  
GATTATCAAGCCAAGCAAAGATAGCGTTATTGATTCAATCTATAAATCA  
GGTTGGCTTGATAAAGGTTACACTGTTGCTCAAGCTAATGCCATTTTAGAA

CTGCAAAAAGCTAAAGGAATGAGTGCAATTTTGTCTAAAGATGAAATTGAT  
AGCGCACTTAGAAATCTCAAGATCATCGAAGAACAACAGGAGCGAGAAGA  
TAAATTAAGTGAAGCTAAAAGAAAGCAGACGCAGGAAATTGAAAAACAAGC  
AAAACCTACTAAACGCTTGGTCGGTATTTCCGGTCAATCCGGTATTGGTAC  
TGGTCCACATCTTGACGTCCGATATGGTGGCTCATTGTCAGGTCAGAAAG  
TTTCTAATGAACATCTGGCTCGATTACAGGCGGGAGGAAAACCTTTAACTT  
CCTACAAGATCAGTTCTAATTATGGTCCACGAAAAGCCCCAACTAAAGGG  
GCTTCTTCATTTCATAAAGGTATTGATTTTTCAATGCCTGAAGGAACACCAA  
TCACGACCAATGTTGCTGTGAAAGATATCAAGACATGGTATGACAGCAAG  
GGAGGTGGTTATGTCAGTGAAGTATCTTTGAGGATGGAGTGTCTCTTAA  
GCTTCTACATCAATCTCCCAAGATGCAGAGCAAGGTGAAAGGTGGTGCAA  
GTAAAGGAAGTGATAAAGCAGCTGGTGATATTCAATCTCAACTTGAACGTC  
AACAGGATTTGCAACGGTCACTTGAAAATGAGGTGGCTAGTGAAGTCGGA  
CGGATTAACAATAATAGAAAGGCAAGACTGGAGGATGTTGATAAAGCAA  
CTTTAGCCCGGAACGTAAGTGCAGAAATAAAGGCGGAAATAAATCGTCGTG  
CAGATAATGATATTGCTATAGCCAAACAAGCCCTTAGAACGAAATTGGAAG  
ACTATAAGGAGTTCCAGAAAACCGAGGAACAGTTACTAGAAGAGTCCTTTA  
ACCGTAAAAAGTTCAATGCAGCTCATGACCTTGAATTAAGTAAGTTTGAGC  
AGAAGCAAGCTGTTGAATTGCTGGAACAGCAAAAACAGCAAGAGTTAGGG  
TTATTA AAACTAGCTCAGGAACAGCGGTTGTTTCAAGCCCGTTTATCTCTG  
CTTTCTGAAACGCAAGCCATGCAGGAACGTTACAGACTCGAACGGGAGGA  
AATTCTTAAGAATACCAAGCTTTCTATAGAAGAGCGGCAAAAGCTAATCGC  
ATTATCTAAAGCCAATCAGGATAAAGAGACACGCGATAAAGTGAATAATGC  
TGTTCAAAACTGGGGTGGTATCCAAGCGGATATGAATGGTACCGGAGAAT  
TTTTCAGACAGGATCAGGAACGATTTAGCCGTTTAAATGCTGCAAATGATT  
TAGCAGATAGTCAATTTGCTGCTACTGATCTTGATGAAAAAATGGTTTAG  
ATGTTCTAAATGCACACATGGAAGCAGGACTCATCAAGCAACAGGACTTC  
GAAAACCGGAAAACAGCTATCATTCAAGCTGCTCAGGACCAACGCAATCA  
GATCGCTGCCGAATATGCTCAGAATGCTCAGGATATTGAAGATAAGTATCA  
CCAAGATCGATTGAATGCTCAAATTGCTCTTGGTGGCCAAATGATGGGTT  
CACTCACATCGATGTTTGGTTCAATGTTTGGCGAGCAATCAAAGCATACA  
AGATCATGTTTGGCTGCTGATAAAGCTTATGCCATTGCAGCTGCAGGTATTT  
CTATTCAGCAAAGTATTGCAAAGGCGGCTAGTGTTGGTTTTCCAGCAAATA

TCCCATTAATTGCAAGTGCTATTGCACAAGGTGCAAGCATCATTGCAAACA  
TCCGGGCAATTAAGATCAAGGCTTTGCTGACGGTGGTTACTGATCA  
GGTGGGAAATATCAGCCTGCTGGTATTGTCCATAAAGGAGAGGTGGTCTG  
GTCCCAAGAAGATATTAACGCTGGGGCGGTGTTGGCTTAGTCGAGAAAA  
TGCCTAAGAGTGCAAACCCTGAAGCTTTTCTCAATAACAATGCCTTGGCA  
GATAGTGTCATGCGCCGTGCAATGATGAGCTCTAGTGCCTTTATAGAAAAG  
CCAAAAGCAGGCTGACATCTTTAATCAACCGGTTCAAGATACTCAGATTAT  
CTATAAGGGTAATAGAGACACACCTAAATTAGCTTCTTCTGGAAATTTAGA  
CTTATTCCATGATGGCAAGGTCTACTTCTCATCCAATGGTTTAGTTCAGGA  
TCGTTCAAATCTGGATGATGTTCCAGGACTTTACTTTAGGAAGTACTTCACG  
CCCTCAAGCTGAGATGATGCCTTCAATTGAGCCAGCTTCACCGACAATCA  
ATTTCAAATTGAAGTGATTAATCAGGTGAGTGGGGCGACAGTTGAAGCT  
GAACAACCTGGATGAGCAAACAGTCCGGATCATTGTTAAAGATGAACTGGA  
TAAGCAGCTTCCAAGAACGGTACCTAAGCTTGTAAAGTATCAAATCGCAA  
TCCAAACTCAACCATTAGTCGGTCTTTGACTGAGAATACGACAGCGAGAA  
GAAATCGTACTTAA

ATGATTAAGTTATTTATAAAAAAGACGCTTTGTCTGAAGAAAAGACAATTG  
AGCAGGCTCAAACCATTGGGCAATGGCTCACTTCAAATATGAACATATG  
CCTGAGCATGTCCGTATCTTTCATACTACAAGCAATATGGATCATGCCGAA  
ATTTCAATTTGCGAATGAAGTCACACCAAAGAATGCATATGACTTAAAGCAG  
CTTGATTTCTTACCGGGCACTTTTATCGTAGTTGAGAACCCTAAATGGGTC  
GCGGCTATTGTTTCGATTGTGATTAGTATTGCGATCGCATTTTTAATGCCA  
ACGCCATCAATAGCACAAACGACTCAAATACTAACCAGTCTTCTTCAGCA  
AACAATGAACTTTCTAACCGGGAAAACAAGATCCGGGTGAATGGTCGTAT  
TGCTGATAACTATGGAGCTGGGTGGAATACTCCCGACCTAATCGCAGTAC  
CTTACAAGGTATATGAAAACAACGTTGAAGTTGAGCATGTAGTGGGCTGTA  
TTGGGCGTGGACACTATAAAATCAATGGAGCTTATGACGGTGAACCAAT  
ATTGTCGATATTGCTGGCGCATCGGTAGAAGTCTTTCGACCAGGTGTAGA  
TATTGTTTCAGGTGAGCCATATTTCTCGCTTGGTACCGAAATTACCACGCC  
GCCACTAACGGTTCAGCATCAAACCTTCTGTTAATGGCCAAGTTTTACGTCC  
TGCTGATACACAATCTTTAGAAGGTACGAACTACCTTCATTTTGCATATCC  
AAACGAGATTCTTCGGGCAACGGCAAACAACACAGATTTAACCCTAAGTT  
TGTAAGTAATGACCGCGTAGAAATCACCAATGCCTCATTACGTTTAAATGG

A2, A3,  
A14

group\_  
6

hypoth  
etical  
protein

L9

S

cellulase activity

CCAGACTTTTGATTTAAATGGTACTTATAGCGTTCTATCGGTAGCTGATGA  
CCGTATGACGTTATCAAATCCGGCGGCCGTTAATGCTAACTGGTTAAAGC  
TTAAAGAGTTAAATAACCAACAACTGCAGCTTTGTCACCAAGATCAGTT  
CAATAGGTGAAAAATGGATTGGTCCATTCTGGACAATGTTGAACGTA  
GCCGGGTGCTGTGTAATTTTGTGGCCACCAATGGACTTTATACCGTTTCTT  
CAGGTGGGTATCAGGCCGCTGTTAATGTCACGATTGAAGTTGAAGTAACA  
CCGGTAAATGAATCTGGTGCAGCGATTGGTAATCCGATGCTGAAGCAGAT  
CATTTTGAAAGGTTCCGGCAAAGTCACGTCAGACCGTTGGTGCAACACTTG  
ATATGGTCACGTTTCAGGGCGTTGTAGTGTCCGTGCACGCCGTTTAACT  
CCGACTCCGACAGTCACAACAGTTGTTGATGAAGTAAAGTGGCAGGCGCT  
TTACGGTGCTTATCCTTTACAAAGCACAGTGTATGAACATGAAACGGTTTT  
TCGTGCGCGTACTTATGCAACCACTGGAGCTTTATCTGTTAAGTCCCGCA  
AGATCAATTTTGATCTTCAGCGAATGTTGCCGACTTATAAAAACGGGGCAA  
TGACAACAGAGCTATATCCAACGTCTAGCTTTGCTGATGCTTTGGTATCTA  
TGGCACTCGATGACAAGATTGGCCGCCGTTTCGATCGATGAGATTGATCTT  
GAAAACATCTATCGGACCTATAATGATGTAGTTGATTATTTTGGTACGCCG  
CTAGCGGCTGAGTTCTGTACTACCATTGATGATACGAATCTATCTTTTGAA  
GAGCTGGTTACCAATCTTTGTGATGCGGTGTTTTGTA CTGCATATCGGCAA  
ACAATAAGCTCAAGCTTTATTTTGAACGGCCA ACTGATAACTCGGTAATG  
CTGTTTAACTTCAGGAATATCATTCCGGATAGTTACAAGCATGACCTGACC  
TTTGGCGTGATGGATGACTACGACGGACTGATCTATGAATACACGGATCC  
GACCGACGATAGCCGTATCAATATCTATTTACCGGATAAAGGAGCCAAAA  
ACCCAAAAGAGGTGAAATCTGTTGGTGTACGAAACAAGTGGCAAGCGCAT  
TTCAATGCATACCGGATTTGGAACAAGATGCGCTTCCAGCGCAAATCCATT  
ACCTTTGATGCGGCACCAGAATCAGAATTACTGGTTTTACGTGACCGGATT  
GCTGTAGCGGATTATCGCAATGGTATTCATCAAAGCGGTGAGGTGGTACA  
GCAAGAAGGTTTAGTCCTCACCTTAAGCCATGATGTAGATTTTCATTGCAGG  
CAAGAGCTATGTGATTTATCTGCAAATGGCCGGATGGCACAGTGGACCTGA  
TTCCTGTTACACCGGGTTCAGCCAAAAATAAGGTGGTTTTAGGGCGGTTG  
CCGAACGGGGCCTTAAAGCTAAGTCCTGATGATTTTGTAAATACCATCTAT  
ACAGTAGTTAATGATGATACTAAAGGTTTCATTGCCTTATCTGGTTGCAAAA  
AGAGAACCGGTTGACCAGTTCTCTAATACTATTACAGCAATTAATTACGAT  
GAGCGCTATTACCTCAACGATAAAGACTTTATTGACGTGCCGGTTGATGAT

|                  |            |                         |                  |   |                                                                                                                                                                                                                                                      |                                                                                                                                                                                                                                                                                                                                                                                                                                                                                                                                                                                                                                                                                                                                                                                                                                                                                   |
|------------------|------------|-------------------------|------------------|---|------------------------------------------------------------------------------------------------------------------------------------------------------------------------------------------------------------------------------------------------------|-----------------------------------------------------------------------------------------------------------------------------------------------------------------------------------------------------------------------------------------------------------------------------------------------------------------------------------------------------------------------------------------------------------------------------------------------------------------------------------------------------------------------------------------------------------------------------------------------------------------------------------------------------------------------------------------------------------------------------------------------------------------------------------------------------------------------------------------------------------------------------------|
| <i>group_623</i> | <i>hfq</i> | RNA-binding protein Hfq | A1, A3<br>C2, C4 | J | RNA chaperone that binds small regulatory RNA (sRNAs) and mRNAs to facilitate mRNA translational regulation in response to envelope stress, environmental stress and changes in metabolite concentrations. Also binds with high specificity to tRNAs | TCTCCAATTTACATTTCGATATGACCAGCTGGATATTAATCTGGCGCGTTTATATCAGATGCAAAGAGGGGATTTGCCAACGACTGGCGAAATCAGTTTTGTAGTTGAATCTGGTGCAGTACTAGTTTCTAGTTTCGAGTTCTTATCGACCGGAAACAGATTTGTCTATAAATTCGACTACAACCTCCAGTCCGCCGAAACAGGAATTATTGCCCTGCAGCGACTGAACTACCCGCCATTGATACTGGTGAGTTCCACCTGATCTGGTGGTAAATCTGACTATTAAGGTGCTGTTGTTGGACGTGGTGGAGATGGCGGGTTGCCACATTTGGCATTGTTGGTGCATGGTCTACCGATCCGGATTATAACTTTACTAAAACCCGCCGTGACGGTTTTTCAGGGAGCACCCGGTTTATTAACCGGCACAGTAACTAAACCTGATTATTGATGGTGGAACTCTGGCTCGAGGCGGCTCAGGTGGTGGAGCAACACCAAGCGGTATTTATACAGGATTATCGTATGGAGTTCAGGGTATTCCCGGTGGAGCTGGAGCACCTTTTGGTTCGGGTTATGACCGGACAACCTATAACGATTCACAAGACTGGCGTTGGTACTTAAATGGTGACTTTATGGTTGTCAAAGTAACCGATGCCGAAGCTTCGGTACCCGGTAAAGGTTACCGAACCCAAATGATCGATATGGATCTCCATTGTCTGGTGGTGGAGGTTGGGGCCAGCGCGGTACCAAGTCCACCAATGATGGAACATGGAACCTGGCAATACCATGGCACAACCTGAAGCCAGCCGGGGCCGGGTGGACCTGCAATTGTTGGGGTGGCACCACCTTACA |
| <i>group_835</i> |            | hypothetical protein    | L8<br>C2         | / | hypothetical protein                                                                                                                                                                                                                                 | ACTCAATTGATCAATGGAGGGAAAATTCTACAAACACTTTAAATGTCTAAAGGTCAAACCTTTACAAGATCCGTTCTTAAATTCTCTCCGTAAGAACGCATCCCAGTTTCTATTTTCTTGTAAACGGTATTAATTACAAGGTCA                                                                                                                                                                                                                                                                                                                                                                                                                                                                                                                                                                                                                                                                                                                                  |
| <i>ahpF_1</i>    |            | Alkyl hydroperoxidase   | L6, L7, L10      | C | Alkyl hydroperoxide reductase                                                                                                                                                                                                                        | TATTGAATCTTTTGACCAATATGTTGTTTTATTAATAAATACTGTAAGTCAAAATGGTTTACAACACGCAATTTCTACAGTTGTTCCAGCTCGCAACCCACGTCAGCAGGTGCACAAGGTGCAGGTTTCCAGCTCAGGGTGGTAGTCAAGGTGGCTTCGGTGGTCAAGGCGCTGGCTTTGGTGGTCAAGGTGCTGGCTTCGGTGGTCAAGGCGGCTTTGGTGGTCAAGGCGGCTTCGGCGGACATCAAGGCGGTTTTGATAACGATTCTAAATTTGAAGATGGTCAAGACGACGAAAACAATCGTTAA                                                                                                                                                                                                                                                                                                                                                                                                                                                                                                                                                              |
|                  |            |                         |                  |   |                                                                                                                                                                                                                                                      | ATGGATTTACTCAGATCAAAAAGCTTTAAAACAAAAACACTTTAGATAAAA<br>CAAAAACAGATGTAGGAATGACTTTTTCTTTTGGGCCGTTTCAGCGACACAAT<br>AA                                                                                                                                                                                                                                                                                                                                                                                                                                                                                                                                                                                                                                                                                                                                                                |
|                  |            |                         |                  |   |                                                                                                                                                                                                                                                      | ATGTTAGATCAAAACATTAATAACTCAATTAAGCTTACCTAGAACGTTTAGAAAGTCCAATCGAATTAGTTGCTGCTTTAGATGAATCAGACAAAGCTGCTCAATTAAGAATTAGTAACTGAAATCGCTGAGCTTTCTGACAAGGTAACAG                                                                                                                                                                                                                                                                                                                                                                                                                                                                                                                                                                                                                                                                                                                           |

e  
reduct  
ase  
subuni  
t F

CCCGTTTTGACGGTAACAATACACATCGTCCAAGCTTTGGTGTGGCTAAA  
GCAGGTGAACAGCCTCGTGTGTTCTTTGCAGGCTTACCAATGGGCCATGA  
GTTTACGTCTTTGATCTTGGCTTTGTTACAAGTGTCTGGCTATGCACCTAA  
AGTGTCCGATGAAGTTTTAAATCAGATTAAGGCTTAAACCTCAAAGCTAA  
CTTTGATGTATTTGTATCACTCAGCTGTCATAACTGTCCGGACGTGGTACA  
GGCGCTTAACCTGATTGCCATTTATAACCCGAACACCACGGCAACCATGA  
TTGATGGTGCATTCTTCCAAGACGAAGTGAACAACGAAAATCATGGCT  
GTACCGATGGTATTCCAGGACAATGAACACATTGGTCAAGGTCGTATGAC  
GCTTGAAGAGATTGTGGCAAACCTTGATACCAATTCAGCTGAAAAGACG  
CAGCAGCACTCAATGCCAAAGATGCGTTTTGATGTATTGGTATTGGTGGT  
GGACCTGCGGGTGCAACAGCTGCAATCTATGCGGCACGTAAAGGCATTA  
ACACAGGTATCGTGGCTGAACGCTTTGGTGGTCAGGTCATGGATACCATG  
GACATTGAAAACCTCACTTCTGTGCAAAAAACACAAGGTCCTAAGTTTGCT  
GCTGAAATGGAAGCACATGTTTCGTGAATACGATGTGGATATCATGAACCT  
GCAACGTGTCAGCAAAATCACTGGTGCAGACCAAACAGCAAATGGCTTGG  
TTGAAGTTGAACTTGAACCGGTGCAAACTTGAATCGAAAACGTGATCC  
TTTCAACAGGGGCACGTTGGAGAGAAATGAATGTACCCGGTGAAGCTGAA  
TACCGTACCCGTGGTGTAGCGTACTGTCCACACTGTGATGGTCCATTGTT  
CAAAGGCAAACGTGTTGCCGTGATTGGTGGCGGTAACCTCAGGTGTTGAAG  
CGGCGATTGACCTTGCAGGTATTGTTGAGCATGTAACCTCTGGTTGAGTTT  
GACACTAACTTCGTGCTGACCAAGTCTTGCAAAACAAGTTAAACAGCTTG  
CCAAACACCACTGTGATTATGAATGCATTAAGCACAGAAGTATTGGGTGAC  
GGTTCACAAGTAACCGGTCTTAAATATAAAGACCGTGCAACTGATGGAGA  
GCATGTGGTAGAGCTTGCAGGGATCTTTGTACAGATTGGTTTACTTCCAAA  
CACTGACTTCTTAAAAGACAGTGAGGTTGAGTTAACCAATCGTGGAGAGA  
TCATTGTCAATGACCGCAACGAAACCAATGTAAGGTTGATTTGCTGCAG  
GTGACTGTACCACTGTACCTTACAAGCAGATCATTATTGCTACAGGTGAAG  
GCGCTAAAGCATCACTCTCTGCGTTTTGATTACATCATTCTGTTCTGGGCAGT  
AG  
ATGTTAGATCAAACATTAATAACTCAATTAAGCTTACCTAGAACGTTTAG  
AAAGTCCAATCGAATTAGTTGCTGCTTTAGATGAATCAGATAAAGCTGCTC  
AAATTAAGAATTAGTAACTGAAATCGCTGAGCTTTCTGACAAGGTAACAG  
CCCGTTTTGACGGTAATAATACACGTCGTCCAAGCTTTGGTGTGGCTAAA

*ahpF*  
2

Alkyl  
hydrop  
eroxid  
e

L6, L7

C

Alkyl hydroperoxide reductase



reduct  
ase  
subuni  
t F

GCAGGTGAACAGCCTCGTGTGTTCTTTGCAGGCTTACCAATGGGCCATGA  
GTTTACCTCTTTGATCTTGGCTCTGTTACAAGTGTCTGGCTATGCACCTAA  
AGTGTCCGGATGAAGTGCTTAACCAGATTAAGGCTTAAACCTCAAAGCTAA  
CTTTGATGTGTTTGTTCGCTTAGCTGTCATAACTGTCCGGACGTGGTACA  
GGCACTTAACCTGATTGCCATTTATAACCCGAACACCACGGCAACCATGA  
TTGATGGTGCATTCTTCCAAGACGAAGTGGAAACAACGCAAATCATGGCT  
GTACCGATGGTCTTCCAGGACAATGAACACATTGGTCAAGGTCGTATGAC  
CCTTGAAGAGATTGTGGCAAACTTGATACCAATTCAGCTGAAAAAGACG  
CAGCAGCACTCAATGCCAAAGATGCGTTTGTATGATTGGTGGTGGT  
GGACCTGCGGGTGCAACAGCTGCAATCTATGCGGCACGTAAAGGCATTA  
ACACAGGTATCGTGGCTGAACGCTTTGGTGGTCAGGTCATGGACACCATG  
GATATTGAAACTTCACTTCTGTGCAAAAGACCCAAGGTCCTAAGTTTGCT  
GCTGAAATGGAAGCACATGTTTCGTGAATACGATGTGGATATTATGAACCT  
GCAACGTGTCAGCAAAATCACTGGTGCAGACCAAAACAGCAAAATGGCTTGG  
TTGAAGTTGAACTTGAACCGGTGCAAACTTGAATCGAAAAGTGTGATCC  
TTTCAACAGGGGCACGTTGGAGAGAAATGAATGTACCAGGTGAAGCTGAA  
TACCGTACCCGTGGTGTAGCGTACTGTCCACACTGTGATGGTCCATCGTT  
CAAAGGCAAACGTGTTGCTGTGATTGGTGGTGGTAACTCAGGTGTTGAAG  
CGGCGATTGACCTTGCAGGTATTGTTGAGCATGTAACCTCTGGTTGAGTTC  
GACACTAACTTCGTGCTGACCAAGTCTTGCAAAACAAGTTAAATAGCTTG  
CCAAACACCACCGTGATTATGAATGCATTAAGCACAGAAGTATTAGGTGAC  
GGTTCACAAGTAACCGGTCTTAAATATAAAGACCGTACAACCTGATGAAGAG  
CATGTGGTAGAGCTTGCAGGGATCTTTGTACAGATTGGTTTACTTCCAAAC  
ACTGACTTTTTAAAAGACAGTGAGGTTGAGTTAACCAACCGTGGTGGATC  
ATTGTCAATGACCGCAACGAAACCAATGTAAGGTTGATTTGCTGCGGG  
TGACTGTACCACTGTACCTTACAAGCAAATCATTATTGCTACAGGTGAAGG  
CGCTAAAGCATCACTCTCTGCGTTTGATTACATCATCCGTTCTGGGCAATA  
A  
ATGAGGGTGCCTCAAGCAACAGTTTATATTGATCGCCAAGCGCTTCAATAT  
AATTTAAACCGTGTCAAACAACCTCGCAGCAAATTCAAAATCGTAAGCATG  
GTAAAGGCCAATGCATACGGACATGGAGTCAAAGACTGTTTAGCAGCCTT  
AAATGCCTCAGATGCCTTTGGTGTAGCCTGCCTACAAGAAGGATTAGAAA  
TCCGTGAACTCGGTTTGAACAACCAAGTTACTTTAATTGAAGGGGATTTT

*alr\_2*

Alanin  
e  
racem  
ase,

A2, A3,  
A14

E

Catalyzes the interconversion of L-  
alanine and D- alanine. May also act on  
other amino acids

biosynt  
hetic

CTGAAGATGAAATGCCCGTCGCAATTGAACAAAAATTTGAATGCGTCATT  
ACCATCAACAACAGTTTGAATGGTTAATTAACACAAACAAGCATATATTG  
CCCAAGGCTTAAAAGTATGGGTTAAATTAATAGCGGTATGAACCGTTT  
GTTTTAAAGACCCAGAAATTATTGAAGTGATTAAGACATTAAGGTCTGA  
ATGAGCAAACTTTTGCCGAATTTTCTTGCACGAAACCTTACAACAAGCT  
CTTGAAGGTTTACTAACCCTCTGTGCAAGAACAATCTATT  
CCTGCTGCTTTAGAAGGTAAAGACCTTCTGTTTCTAGCCAGACTGGTCT  
GGTAAAACCTGCTGCATTCTTATTACCGACATTACATAATTTGGCAGGTCAA  
GATACTTTCGTTCCGTTCAAAGAACGTATGAAAGCAGTGACTCAGCCTAG  
CATTTTAGTTTTATGCCCAACACGTGAATTGGCTCAACAAGTTAGCCAAGA  
CGCAATTGCTTTTGTACGTCACATGAAAGGTGTTTCGATTGCTGCAATTAT  
GGTGGTATGCCTTTTGGTAAACAAATTCAACAGCTTAAAGGTGCTCAAGT  
TGTAAGTTCGACTCCAGGTGCTTTATTAGACTTAGTTAACCGTCGTCATT  
AAAGCTAGACAAAGTTGATGCTTTAATCGTGGACGAAGCTGACCGTATGTT  
AGACCTTGGTTTCTCTGAAGACTTAGAAGCGATCAGTGACTTGGCTGCGA  
ATCGTGGTCAAACGTTAATGTTCTCTGCAACTTTTCTGACCGTATTATTC  
GTCTTGCTGAGCGCATGATGAATGAACCTGAGCGTATTGCAATTGAACT  
GGTCACAGCACCAATACTGACATCACCCAACTTTACTGACAGATGG  
TTTCGAACACAAGAAGAACTTCTGACTACTGGTTGGCTGATGAAACGCT  
TGACCAAGCTGTTGTATTTCGCGAGCACACAAGAAGATACAGATATGTTGG  
CTGAAGAACTTGCAGAAGCAGGTCACTCAGTTGTTGCACTTCACGGTGCA  
ATGCCGAAACAGTTCGTAACCGTCGTTTACGTAGTATCCGTGAAGGCCG  
TGCGAAAATCTTAGTTGCTACTGACGTTGCTGCACGTGGTCTTGACGTT  
CAACAATTTACACGTTATTAACCTTCGGCTTACCAATGAAGCATGAAGATT  
ATGTACACCGTATTGGTCGTACAGGTCGTGCTGGTCGTACAGGTCAAGCG  
ATTACTTTAGCGACTTATCGTGAACGCGGTAATCCGTGCGCTTGAAGA  
CTACTTAGAAGCTCGTTTAAATGTTTCTGAAATTGAAGGTTTGAAGCCATC  
TCCACCTCCAGCTCGTCCACGTCGTGAAGGTGGTCGTGGTGGTAACGGT  
GGCCGTGATGGTCGTGTTTTCGAGGGTGAAGGTAACCTCAAACGTCGTGA  
AGGTGGTCGTGATGATCGTCCACGTCGTAGCTTCGATGATAAGCCTCGTG  
GTGAGCGTCCTGCTTTTCGGTGGCGAAGATCGTCCACGTCGCGAGTTCAA  
CTCAGATCGTCCACGTCGTGAAGGTGGTTTTGAAGACCGTCCACGTCGTA  
GCTTCGGTGGTGAAGATCGTCCACGTCGCGAGTTCAACTCAGACCGTCCA

*deaD*

ATP-  
depen  
dent  
RNA  
helicas  
e  
DeaD

A2, A3,  
A14

L

Belongs to the DEAD box helicase family

*dhbF*

Dimod  
ular  
nonrib  
osoma  
l  
peptid  
e  
syntha  
se

L9

/

amino acid adenylation domain-  
containing protein

CGTCGTGAAGGTGGTTTTGAAGACCGTCCAAAACGTAGCTTCGGTGGTGA  
AGATCGTCCGCGTCGCGAGTTCAACTCAGATCGTCCACGCCGTGAAGGT  
GGTTTTAACGATAAGCCTCGTTTTGATTCAAATGATGACAATCGTGGTAAC  
CGCGTAGACTATAAACCACGTCGTGAAAACGGTTTTCGGTGACCGTCCACA  
ACGTAGCTTTGGTGGTGAAGATCGTCCACGTCGTGAAGGCGGTTTTGGTG  
ATCGTCCAAAACGTAGCTTTGGTGGTGAAGAACGTCCACGTCGCGCAGTT  
CGCGAAGAACAATTAATCAAGAATCTCGTGGTGAGCGCCGTCGTAAATT  
CGACCGTTAA  
ATGTTCTGGGAACGTCTGGGTGGTATGGATGAGTTTAAAGAACTACTCCT  
ACCAATCCAGACTCCGGCCACTTTGGTTGGACAAGATTTGACGTTAGGAA  
GTTTTCCGGTTCGCCAGCAAGAAGGACAGTTGGATATTACGCTGGAAATG  
GGCGGTGAATATCAAGGTGAACTCGTTGGTGTATTGAAATACAACACTGA  
TCTATTTTCTGCGCAGTCTGCCAAGAATATGGTGAACACTGCTGCAAGCTGT  
GCTATCAGAGATGGTGGCTCACCTGAACGTAAGATCGTTGAGTTAGATA  
TCGCACCTGATTATAAAGATAGTATCCAGTTCGAGGCCCTCCGTGGAAAG  
GCGACTGATTATGCTCAGCATGATCTATTCGCAATGATTCTCAAGCAGATT  
GATGAGCGTGGTGACAATCATGCTTTGACCTCAAACGATCATGCGGTTAG  
CTACTGTGAGTTAGGTCAACATATTGCTGGTATTGCTGAATATTTGTGTGC  
ACACGGCATTACACGCGGTGATCGTGTAGGTCTGATGTTAGACCGCAGG  
GCGTTATTGCCAGCAGCAATCCTTGGGATCTGGGCGGCAGGTGCAGCTT  
ATGTGCCACTGGATCCTAATTTCCCAACTGAACGTCTACAGAACATTATTG  
AAGACGCTGAACCTAAAGTCATCTTGACTCAAACCGAGTTAATGGATGGT  
CTTAACGTTTCTGTGCCTCGCTTAGATATCAATCAAGCTGGTGTGTGGCA  
CTTGAACAAGTGCGCGAGACGCTTGCCTTTGGTGACATAGCTTATGTGAT  
GTACACATCAGGCTCGACAGGTAAGCCTAAAGGTGTCCGATTGGGCATC  
CTTCAATTATCAATTTCTTGCTATCTATGAATGATAGATTGCAAGTAACGAC  
TGAAACTCAGTTGTTAGCAATCACACGATGCATTTGATATTTCAATTCTT  
GAATTAATCATTCCGCTGATGTACGGCGGTGTGGTGCATGTTTGCCACG  
TGAGGTATCACAAGATGGCAATCAATTGGTGGATTATCTAAATGCTAAGTC  
TATCAATATTCTGCAGGCAACACCGGCTTCTTGAAAATGCTCTTAGACAG  
CGAGTGGAGCGGCAATGCGGGATTGACAGCACTCTGTGGAGGCGAAGC  
GTTAGATACTATTCTGGCAGAAAACTGCTGGGTAAGTTCGGTTGCTTATG  
GAATGTCTATGGTCCGACCGAAACTACAGTGTGGTCTAGTGCGGCTCGTA

TCACTGATGCAAAGTATATTGATTTAGGTGAACCACTGGCGAACACTCAGC  
TTTATGTCCTTGATGAACAGCAGCGTTTAGTTCCACCAGGTGTTATGGGTG  
AGCTTTGGATTGGTGGTGGTGGTCTGGCAGTTGATTACTGGCATCGACCA  
GAACTGACAGATGCCCAATTTAGAACATTGCCATCTCTACCAAATGCCGGT  
CGACTCTACCGTACAGGGGATAAAGTCTGCCTGCGTACAGATGGACGCTT  
GACTCATCACGGACGTCTGGATTTTCAGGTCAAGATTTCGTGGGTTCCGTA  
TTGAACTAGGTGAAATTGAGAATGTTCTCAAACAAATCGACGGTATTACAG  
ACGCAGTAGTGCTAGTTAAACTACAGCTGACAACGACCAGAACTGGTG  
GCGTATGTA ACTGGACAAGAGCTTGATATTGCTGGTTTGAAAAAGACCCTA  
CAAATCCATCTTCCAGCTTATATGGTGCCAAGTGCCTTTATCCGATTGGAT  
GAGTTTCCAATGACGGCCAACAATAAGTTGGATCGTAAGGCATTTCTCTGA  
GCCGATCTTTGAGCAGAGCAATGATTATGTTGCACCGCGTGATCCGATTG  
AAATCGAACTGTGTACTACCTTTGAACAAATCTTGTGCGTCAAGCGAGTTG  
GTATACATGATGATTTCTTTGAATTAGGTGGGCATTCACTATTAGCTGTGA  
AGCTTGTCAACCATCTTAAAAAGGCTTTTGGTACCGAACTGTCAGTTGCTT  
TGTTGGCACAGTACTCCACTGTGGAACGTCTGGGTGAGATCATTTCGTGAA  
AATAAAGAAATTAACCATCCATCGTAATTGAGCTGCGCCGTGGAACCTAT  
GAACAACCACTGTGGCTGTTCCATCCAATTGGTGGCAGTACCTTCTGTTAT  
ATGGAACTTTCGCGTCATCTTAATCCGAACCGTACCCTACGTGCTATTAG  
TCTCCTGGACTGATTGAGGCCGATGCTGCGGAAGTGGCGATTGAAGAAAT  
GGCGACGCTCTATATTGCTGAAATGCAAAGATGCAGCCTCAAGGACCTT  
ATTTCTCGGTGGCTGGTGTTTCGGTGGTGGCAGTGCATACGAGATCAGT  
CATCAGTTGCGTCAAATGGGACAGCAGGTACAGGGATTGTCATGATCGA  
TACCCGTGCTCCAATTCCAGAGAATGTGCCTGAAGATGCCGACGATGCCA  
TGCTTTTGTCTTGGTTCGCCCCTGATTTGGCTGCACCTTATGGCAAAAAGT  
TGACGATCCCAGCGCAATATTTGCGTGAGTTGAGTCCAGATCAAATGTTT  
GATCATGTACTTAAAGAAGCTAAAGCCATTAATGTTCTGCCTCTCGATGCA  
GACCCATCAGATTTCCGACTTTACTTTGATACTTATTTGGCGAATGGCATC  
GCACTCCAGACCTATTTCCCTGAACCTGAAGATTTTCCAATCCTTTTGGTC  
AAGGCCAAAGATGAGCAGGAAGACTTTGGAGAAAGTCTAGGTTGGGATCA  
ACTAGTCAAAGACACGTTGACACAAGTCGATTTGCCTGGTGACCACTCAT  
CAATTATGTACGCTGAGAATGTCGTGGCTGTAGCCCAGACAATTGATCAG  
ATGTACCCAATTCCTACATAA

*eptA\_1*

Phosphatase  
EptA

L9

S

Domain of unknown function (DUF1705)

ATGTTTAATCTCATTATAGCCATTTGGCTAGGTGCAATTTTAAATATTGGTT  
TTTATCATCAAGTCCATACTTTAACTCCATATTTTGGAGTAAAGGCTATTTT  
GTTTTAGCTGCTACTCTCATAATTCTTGTTGCTACCTATTATGCGGTTTTA  
CAAATCTTAAATTGGAAATGGACTGCCAAAATCTTTGCAATTTTATTGATAT  
TTATTGGTGGTTTTAGCTCTTATTTTGTAAACACATTAGGTGTCATTATTC  
ACCCGACCAAATTCAAATATGGTGCAGACCGATGTTTCGGAAGTTACCG  
ATCTAATCTCTTACGCTTTGTTTTATGGACAATTTTTTTTGTATTTTACCC  
ATTTTTTTAATTACTCAAGTTAAATTTAAACAAGAAAAAGTATCACGGTTGTT  
ATTGAAGAAAGTATTCTCACTGGTAGCTTCATTGGCCGTGGTCCGGTGT  
ACTTTTTACCTACTATGTCGATTTTGTGCAATATTTTCGTGAGCATCGTGAT  
TTAAAAGGGATGATTTACCGCAAATAGTATTTTCATCGCTTATGTCTTACT  
ACCATAAGAAGGCTCCGAAGAAAATCTGCCTCTTGTGATATATGGACAA  
GATGCTCATCAAGTTCAGCGCGTACAAAAGAATCTCCCTAAGTTAATGATA  
CTTGTTGTGGGTGAAACGGCACGTGCCGAAAGTTTCTCTCTAAATGGGTA  
TGCAAAAATACGAATCCGGAGCTTTCTAAACAAGATATTTTCAACTTCTCT  
CAAGTGAGCTCATGCGGTACGGCAACAGCGGTTTCTGTGCCATGTATGTT  
CTCGGGTATGCCACGTGTAGATTATGATGAGCAATTAGCCAGTCACCGCG  
AAGGTTTACTAGATATTGCAAAACGTGCGGGTTACCAAGTAACTTGGATTG  
ATAATAACTCGGGTTGTAAAGGTGCATGTGATCGCGTTGAGCAATACCAG  
ATTCCAGAAAATTAAGAAAAAATGGTGTAAAGATGGCGAATGTTATGAT  
GACATTCTCATTGACAGCTTAAAGCAGTATTTGTCTACTATTGCCAAAGAT  
GATGATCGTCCACGTTTGATTGTTTTGCATCAGGTGGGTAGTCATGGACC  
TGCATATTACAAGCGTGCGCCTGAAGCATATCAACCCTTTAAACCGACTTG  
TGATACGAATGCGATACAGGGCTGTTTCGCAAACCGAATTGCTAAATAGTTA  
TGATAATACAATCGTATATACAGACCATGTATTAAGCCAAATGATTAATACT  
CTAAAAGAAATATCAAATATCAGACAGGTTTATGGTATTTATCTGATCATG  
GCGAATCAACCGGAGAACATGGTTTATATTTACATGGTTTACCTTATGCAA  
TCGCACCGAGCCAACAAACACATGTACCAATGATTATGTGGTTCTCTGAAA  
GTTGGAAACAACATAATCTTGCTCAAGTGAATTGTTTAAAGCCAACAACTA  
AACAAAAGTTAAGTCAGGATAATTTATTCCCAAGTTTGTAAAGTTTGTGGA  
TGTAACAACCTCAGGTCATCAACCCTCAACTGGACATGTTGCACTCTTGTGC  
CCATGTAAACTAA

|                 |                                                  |             |   |                                                                                                                                                                                                                |                                                                                                                                                                                                                                                                                                                                                                                                                                                                                                                                                                                                                                                                                                                                                                                                                                                                                                                                                                                                 |
|-----------------|--------------------------------------------------|-------------|---|----------------------------------------------------------------------------------------------------------------------------------------------------------------------------------------------------------------|-------------------------------------------------------------------------------------------------------------------------------------------------------------------------------------------------------------------------------------------------------------------------------------------------------------------------------------------------------------------------------------------------------------------------------------------------------------------------------------------------------------------------------------------------------------------------------------------------------------------------------------------------------------------------------------------------------------------------------------------------------------------------------------------------------------------------------------------------------------------------------------------------------------------------------------------------------------------------------------------------|
| <i>ermC'</i>    | rRNA adenine N-6-methyltransferase               | A1, A3, A14 | J | Specifically dimethylates two adjacent adenosines (A1518 and A1519) in the loop of a conserved hairpin near the 3'-end of 16S rRNA in the 30S particle. May play a critical role in biogenesis of 30S subunits | GTGGAATACGGGTTTGCTAAAAGATTATTAATACAAAACGCTCATTGGCA<br>TTACTTTTAATGGCAGAAGTTGATATTTCTATATTAAGTATGGTTCCAAGAG<br>AATATTTTCATCCTAAACCTAAAGTGAATAGCTCACTTATCAGATTAATAG<br>AAAAAATCAAGAATATCACACAAAGATAAACAGAAGTATAATTATTTGTT<br>ATGAAATGGGTTAACAAAGAATACAAGAAAATATTTACAAAAATCAATTTA<br>ACAATTCCTTAAAACATGCAGGAATTGACGATTTAAACAATATTAGCTTTGA<br>ACAATTCCTTATCTCTTTTCAATAGCTATAAATTATTTAATAAGTAA<br>ATGCCACCCTTAGCAAGTTTGCCTCATTCTGAGTTGGTTATTCATGTAGGT<br>TCATTGTCTAAAGTTTTTGCACCCGGTATTCGGTTAGGTTACATCGTGGCA<br>GCTCCAACATCATTCAAACCATTACTGAAGATATTTTATTGATTGATCGGC<br>AGGGCAATAATATTACGGAACCTCGCTTTAGCCGATTTAATGCAACGAGGG<br>GAAATCAAGCGACACATCCGTAAAATGAAAAGATTTATCAGTTACGTCGA<br>GACCATGCGTTAGCTGAGTTTCAAAGAGTTTTTGTCTGAGAGTATTCAGATA<br>CAACCGCCCGCGGGTGGAAATGGCTTTGTGGTAAAATTTCAGAAATCATT<br>TACTCAAAATCAGCTCATAAAGCTAAAAGAACTCAACATTGATACAGAGCA<br>GAAGTTTAAACAGAAAGAATATCCTAATTGTAGTATCCGCTTTGGTTTTGC<br>AGCTTTATCAGAGAAAGAAATCACCTCTCTAATTGAGACCTTAAATGAAGC<br>TCTTAATAAAAAGAACAGCGGACTTATAA |
| <i>gabR_3</i>   | HTH-type transcriptional regulatory protein GabR | L6, L8, L9  | K | helix_turn_helix gluconate operon transcriptional repressor                                                                                                                                                    | ATGCCCTGGCTGGAAGCGGCGGGGGTGGCGCTGGACAGTCAGGGGCGT<br>ATTAAGCCGGAGTGGAGAGTCGTTACCGTTATCAGACCAGTCAGGAGAA<br>GATCTTTGCCGGCGGCGATGCCGTGCGCGGCGCAGACCTTGTAGTGACG<br>GCGATGGCGGAAGGCCGTCACGCGGCGCAGGGGATCCTGGACTATCTG<br>GCGCGGAAAACGACGCCGCTTCACTGA                                                                                                                                                                                                                                                                                                                                                                                                                                                                                                                                                                                                                                                                                                                                                   |
| <i>gltD_2</i>   | Glutamate synthase [NADPH] small chain           | A1, A3, A14 | C | Glutamate synthase                                                                                                                                                                                             | TTGCCACATTTGGCATTGGTGCATGGTCTACCGATCCGGATTATAACTTT<br>ACTAAAACCCGCCGTGACGGTTTTTCAGGGAGCACCCGGTTTATTAACCG<br>GCACAGTAAACTAAACCTGATTATTGATGGTGGAACTCTGGCTCGAGGCG<br>GCTCAGGTGGTGGAGCAACACCAAGCGGTATTTATACAGGATTATCGTAT<br>GGAGTTCAGGGTATTCCCGGTGGAGCTGGAGCACCTTTTGGTCGGGTTAT<br>GACCGGACAACCTATTAACGATTCACAAGACTGGCGTTGGTACTTAAA<br>TGGTGACTTTTATGGTTGTCAAAGTAACCGATGCCGAAGCTTCGGTACCCG                                                                                                                                                                                                                                                                                                                                                                                                                                                                                                                                                                                                           |
| <i>group_10</i> | hypothetical protein                             | A1          | / | hypothetical protein                                                                                                                                                                                           |                                                                                                                                                                                                                                                                                                                                                                                                                                                                                                                                                                                                                                                                                                                                                                                                                                                                                                                                                                                                 |

|                   |                      |                |   |                               |                                                                                                                                                                                                                                                                                                                                                                                                                                                                                                                                                                                                                                                                                                                                                                                                                                                                                                                                                                                                                                                                                                                                                                                                                                                                                                                                                                                                                                                                                                                                                                                                                                      |
|-------------------|----------------------|----------------|---|-------------------------------|--------------------------------------------------------------------------------------------------------------------------------------------------------------------------------------------------------------------------------------------------------------------------------------------------------------------------------------------------------------------------------------------------------------------------------------------------------------------------------------------------------------------------------------------------------------------------------------------------------------------------------------------------------------------------------------------------------------------------------------------------------------------------------------------------------------------------------------------------------------------------------------------------------------------------------------------------------------------------------------------------------------------------------------------------------------------------------------------------------------------------------------------------------------------------------------------------------------------------------------------------------------------------------------------------------------------------------------------------------------------------------------------------------------------------------------------------------------------------------------------------------------------------------------------------------------------------------------------------------------------------------------|
| <i>group_1024</i> | hypothetical protein | L7, L10        | / | hypothetical protein          | <p>GTAAGGTTACCGAACCCAAAATGATCGATATGGATCTCCATTGTCTGGTG<br/> ATGGTGGAGGTTGGGGCCAGCGCGGTACCAAGTCCACCAATGATGGAAC<br/> ATGGAACGGCAATACCATGGCACAACCTGAAGGCCAGCCGGGGCCGGGT<br/> GGACCTGCAATTGTTGGGGTGGCACCCTTACAACCTCAATTGATCAATGG<br/> AGGGAAAATTCTACAAACACTTTAA<br/> ATGAAAAAGTTGGTTGCTGCACTTGTCTGTAATTGTTATTTAACTGGATGC<br/> GTTTACGACCCTGTTAATTACGACAAAATACACGACCAAGAGTTCCAAGAC<br/> CACCTCAGGCCAAAACGGTTAG<br/> ATGAGTACTCTTCAAGAGCGAATGTCTTTAGCTATAAAGCACTATGAATCT<br/> GTGACAGGTAAAAGATTCAAAAATACTGAGCTGGCTAGATTTGCAGGCGT<br/> GAGCAGGGCTAATGTTGGGTTGTGGGTAAATGGCCCAACCCAAGAGTTG<br/> GAGGGGTCAAATTTAGTTAAAGCGGCTGAGTTTTTAGGAGTTTCTAAAGAT<br/> TGGCTAGCTGGACAAGGTAATAAAATGATTGCCACACAGCTGGATGGTGG<br/> TGGTGACAATTAATGTTCTTGATATTGAAGCCTTTAAGCAGAAGTACAA<br/> CATTCCAGATAGTGAAGATGCTGTTAAGTTTGTTCAAACATCAGATAAACC<br/> ATCCCTATTCAAAAAGATACGTTCCCGTCAAAGCTTATTCAAAGATGGG<br/> TATGGATGGGTATTTACAGATATGGGATACGATGGAAATGCTGGAGATG<br/> GGTATGTTCCAACCTCACTCAGCAGGACCAAGAGCCTATGGTATTAAGGC<br/> ACTGGCGACTCAATGTTTCCAGCTATCCGTAATGGATGGTATGTGGTTTGT<br/> GATCCAGATGCGGAACTCGTGCCGAATGAGTTTGTTCAGGTATGCTTGAA<br/> GGATGGAAGATGCACAATTAAGAATTTGTTGGCATAAATGGCGGGGTTT<br/> TAAGCTTGCTTTCTGTGAATGGTGGTGAGCGATTTTTCTTTGAAATGGATG<br/> AGGTAGAAAGCATTACAGCTATTACTGACATCGTACCACCAAGTCAGCAC<br/> AGACAAGAACATCCTTATTCGCATTAA<br/> ATGTTTCCAGCAATTCGTAATGGCTGGTATGTTGTATGCGACCCTGATGCA<br/> GAGCTTGTGCCGAATGAGTTTGTTCAGGTGTGCTTGAAGGATGGAAGATG<br/> CACAATTAAGAATTTGTTCGGCATCAATGGTGGGGTTTTAAGTTTGCTTTC<br/> TGTGAATGGTGGTGAGCGATTTTTCTTTGAAATGGACGAGGTTGAAAGTAT<br/> TACCGCTATTACAGATATCGTGCCGCCAAGTCAGCACAGACAAGAACATC<br/> CTTATTCGCATTAA</p> |
| <i>group_108</i>  | hypothetical protein | A2, A3, A14    | K | Peptidase S24-like            | <p>ATGTCATCAGTCAGCATTGCTGAATACCGCAAGTTATTTCCATAAAGAAA<br/> AATAAAAAGCGCGGTTTCCAGCAAAGCAAGTTGCCAGACAACCAAGTGTGGG<br/> TGAAGTGGTTCTGGCAACGCATTTAAGAGCATGCAAGATTGGTTTTGAACA</p>                                                                                                                                                                                                                                                                                                                                                                                                                                                                                                                                                                                                                                                                                                                                                                                                                                                                                                                                                                                                                                                                                                                                                                                                                                                                                                                                                                                                                                                         |
| <i>group_109</i>  | hypothetical protein | L6, L7, L8, L9 | S | Peptidase S24-like            | <p>ATGTCATCAGTCAGCATTGCTGAATACCGCAAGTTATTTCCATAAAGAAA<br/> AATAAAAAGCGCGGTTTCCAGCAAAGCAAGTTGCCAGACAACCAAGTGTGGG<br/> TGAAGTGGTTCTGGCAACGCATTTAAGAGCATGCAAGATTGGTTTTGAACA</p>                                                                                                                                                                                                                                                                                                                                                                                                                                                                                                                                                                                                                                                                                                                                                                                                                                                                                                                                                                                                                                                                                                                                                                                                                                                                                                                                                                                                                                                         |
| <i>group_111</i>  | hypothetical protein | A2, A3, A14    | S | Protein conserved in bacteria | <p>ATGTCATCAGTCAGCATTGCTGAATACCGCAAGTTATTTCCATAAAGAAA<br/> AATAAAAAGCGCGGTTTCCAGCAAAGCAAGTTGCCAGACAACCAAGTGTGGG<br/> TGAAGTGGTTCTGGCAACGCATTTAAGAGCATGCAAGATTGGTTTTGAACA</p>                                                                                                                                                                                                                                                                                                                                                                                                                                                                                                                                                                                                                                                                                                                                                                                                                                                                                                                                                                                                                                                                                                                                                                                                                                                                                                                                                                                                                                                         |

*group\_*  
115

hypothetical protein

A2, A3, A14

S

Domain of unknown function (DUF4055)

GGAATATAAGTTCCATCCTGAACGCAAATGGAGAGCAGATTTTTTAATAAAA  
GGGTTCAAAGATTTTGATTGAGGTAGAAGGCGGGATCTGGAGCGGAGGC  
CGTCACACAAGAGGTAAGGGCTATTTAGGGGATATGGAGAAATACAACCTC  
CGCAGCAATGATGGGTTTTACAGTTTTACGGTTCAGCACAGAGCAAGTGA  
AAGCAGGCGTGGCGATTAACAAATTGAGCAATTGGTGGGATGA  
ATGAGTGATGTAACTTTTCAACATGCTGAATATGTTAAGAACTTGCCATACT  
GGCAAAAACCTTGATGATGTTTGTGAAGGTGAAGATGCAGTTAAGGCTAAA  
GGTGAAAAATATTTGCCGATGCCAAATGCACATGATAAATCACCTGCAAAT  
AAAAGCGCTTATGAGGCTTATCTTACCCGTGCAGTCTTTTTATGAAGTAACA  
GGGACTACATTAATAGTTTAGTTGGTGCAGCTTTTGAACCGATCCAAGT  
TTAAATTTCTCCGGAACCTTGCTCATTTAGAACGTAATGCAAATGGTGCT  
GATTTAAGTACTTATCAATTGGCTCAAAATGGAATTCGCCATTTATTGAAGC  
ATTATCGTTGTGCTTTATATGTAGATTATCCTGATGTGCCGCCAGCTCGTA  
ATCTAGCGGAATTTAAAGCACAAAAGCCTATCCGATGATTCATTTACTAA  
ATGCCCTTGATGTAGTGAATTGGGATTCAGTAATGATCGATAACCAGAAAA  
AGCTTTGCTTAGTGGTTATACGTGAATTTAAGTCTGAGCGCGGTGCTGAT  
GGATTTAGTAAAACCGAACAAGAGCAATATCGTGTACTTTCGTTTAGAGCAA  
GAGGGAAATGGGGAATATATTTATTCCGTTTCAGGTGTACACAAAGGGTGA  
AAAGGGTAACTGGGTTGGCGGAGAGAAGAAGTTTCCAACAGATTACAACG  
GGAATTTCTGGACCTATATACCTTTTACATTTGTAGGTGCAATTGATAATTC  
AGAAGAGATTA AAAAGCCACCATTACTTCCTTTGGCTAATCTCAATTTAGC  
CCATTACAGAGACAGTGCGGACTTTCAAGAGTCCGTTTTTTATATGGGGC  
AACCTCAATATTATGCGAAGGGTGTTAATTGGGAGTGGTATGACCAAGCC  
AAGAAACGTGGCATCTACATTAGAGCGAAAGTACTTTTTGCCTTTACCTGAA  
AATGGTGGTTTAGGAATTGTACAAGCCGACCCTAATACTCTTGCCCGGGA  
AGCGATGAAAGATAAGTGGGAAAAAATGAAGGAGATGGGGGCGCGTTTA  
ATTGAGAAGGGCTCGGGAAGTAAAAGACCGCTACCGAAGCGAATAGTG  
ATGACGCCGTTTCAGCATTACAGTTCTTTTCGCTCTGTGTCGTTAATATGAATG  
AAGCCTTGTCAGCAGCATTACGATGGGCTGCTAAGTTTTAA  
ATGTTCGAAATCAGTCAAGAATTTAACAACAGGGTTATTTAGCTGAGTTA  
GCTCGACAGTTATTTGAAGCAGCTCTACAAGGCCGATCTTCATTTAAATCA  
TGGTGGGAATACAACCAAACAGGTATGTTCCCTAAACAAAAATATGAAGAA

*group\_*  
117

hypothetical protein

A2, A3, A14

S

Domain of unknown function (DUF4055)



|                   |                             |             |   |                               |                                                                                                                                                                                                                                                                                                                                                                                                                                                                                                                                                                                                                                                                                                                                                                                                                                                                                                                                                                                                                                                                                                                                                                                                                           |
|-------------------|-----------------------------|-------------|---|-------------------------------|---------------------------------------------------------------------------------------------------------------------------------------------------------------------------------------------------------------------------------------------------------------------------------------------------------------------------------------------------------------------------------------------------------------------------------------------------------------------------------------------------------------------------------------------------------------------------------------------------------------------------------------------------------------------------------------------------------------------------------------------------------------------------------------------------------------------------------------------------------------------------------------------------------------------------------------------------------------------------------------------------------------------------------------------------------------------------------------------------------------------------------------------------------------------------------------------------------------------------|
| <i>group_12</i>   | IS6 family transposase IS26 | A2, A3, A14 | L | Transposase IS66 family       | GAGCTTCAGAATGTTGAAGCAGAGCAAGATGGGACTTTAAATCAAAAGGT<br>AGAGTGA<br>ATGAACCCATTCAAAGGCCGGCATTTCAGCGTGACATCATTCTGTGGGC<br>CGTACGCTGGTACTGCAAATACGGCATCAGTTACCGTGAGCTGCAGGAGA<br>TGCTGGCTGAACGCGGAGTGAATGTCGATCACTCCACGATTTACCGCTGG<br>GTTTCAGCGTTATGCGCCTGAAATGGAAAAACGGCTGCGCTGGTACTGGC<br>GTAACCCTTCCGATCTTTGCCCGTGGCACATGGATGAAACCTACGTGAAG<br>GTCAATGGCCGCTGGGCGTATCTGTACCGGGCCGTCGACAGCCGGGGC<br>CGCACTGTCGATTTTTATCTCTCCTCCCGTCGTAACAGCAAAGCTGCATAC<br>CGGTTTCTGGGTAAAATCCTCAACAACGTGAAGAAGTGGCAGATCCCGCG<br>ATTCATCAACACGGATAAAGCGCCCGCCTATGGTCGCGCGCTTGCTCTGC<br>TCAAACGCGAAGGCCGGTGCCCGTCTGACGTTGAACACCGACAGATTAA<br>GTACCGGAACAACGTGATTGAATGCGATCATGGCAAACCTGAAACGGATAA<br>TCGGCGCCACGCTGGGATTTAAATCCATGAAGACGGCTTACGCCACCATC<br>AAAGGTATTGAGGTGATGCGTGCACTACGCAAAGGCCAGGCCTCAGCATT<br>TTATTATGGTGATCCCCTGGGCGAAATGCGCCTGGTAAGCAGAGTTTTTG<br>AAATGTAA<br>ATGACTCATTTCAAAAAGCACCCCGACGGCTACAAGTCATTTTTAGGCCGT<br>GATGATAAGGGCCTCTACTCTGTTCTGATTGGCTGGCAAGTGTACGCATC<br>TAATGCTAATGGCTCAGTTCTTTACAAAGTTAAAGACGGATTTAAGACGCC<br>TTTAAATGTGTATAAGTTTCAAACCGACTATCCAAAAGTTTGAATGAACTC<br>ACACAAGAAATCGACTTTCAACGCAGAAAGCAGCTCGCAATAAAACTGCG<br>TGAAACAAACATTCTACTTATGACCGCAAAGCATATAAGCAAAAACGCGG<br>CTTCACCGGCTCTAGATGA |
| <i>group_1212</i> | hypothetical protein        | A3          | / | hypothetical protein          | ATGAGTTTATTTTCGCTATGGTTTAGACTATGTTCAAATGGCGATTGAGCGT<br>TTAATTGGTTTTGGGAAAAAAGAAGAGTTTAAAGGAAATTTGGCAATTTTAA<br>GAAGGCAGAACCCTGATAGGATAAGGGTTCTGTGA<br>ATGCCTGAGATACAAATTATTGCCAAGGATAATCATAAAACCTTGGTAACC<br>ACAGAGGGGAACTTCTGCAAACCTTTCAGAAGCGTCAGTTGTGTTGGTGAA<br>AGTGGCTGCCAGCGATGTATTGGTAGTAAATAGGGAGGGTACCAATGCAG<br>TCATACGTCTGAAAAATGGCGAGACTATTGTTATTGAAGGCTTCTTTAGTG<br>GAACAGCTGAGCCTAAAGATAATAGTCTGGTTTTCCAAGATGAAAATGGAC<br>AGTTGATTTGGGCAAATTCAAAGATGCTGAAAATGATGCAGATGCTGATA                                                                                                                                                                                                                                                                                                                                                                                                                                                                                                                                                                                                                                                                                                                               |
| <i>group_1216</i> | hypothetical protein        | A2, A3, A14 | L | Transposase DDE domain        | ATGAGTTTATTTTCGCTATGGTTTAGACTATGTTCAAATGGCGATTGAGCGT<br>TTAATTGGTTTTGGGAAAAAAGAAGAGTTTAAAGGAAATTTGGCAATTTTAA<br>GAAGGCAGAACCCTGATAGGATAAGGGTTCTGTGA<br>ATGCCTGAGATACAAATTATTGCCAAGGATAATCATAAAACCTTGGTAACC<br>ACAGAGGGGAACTTCTGCAAACCTTTCAGAAGCGTCAGTTGTGTTGGTGAA<br>AGTGGCTGCCAGCGATGTATTGGTAGTAAATAGGGAGGGTACCAATGCAG<br>TCATACGTCTGAAAAATGGCGAGACTATTGTTATTGAAGGCTTCTTTAGTG<br>GAACAGCTGAGCCTAAAGATAATAGTCTGGTTTTCCAAGATGAAAATGGAC<br>AGTTGATTTGGGCAAATTCAAAGATGCTGAAAATGATGCAGATGCTGATA                                                                                                                                                                                                                                                                                                                                                                                                                                                                                                                                                                                                                                                                                                                               |
| <i>group_1256</i> | hypothetical protein        | L7, L9      | S | Protein conserved in bacteria | ATGAGTTTATTTTCGCTATGGTTTAGACTATGTTCAAATGGCGATTGAGCGT<br>TTAATTGGTTTTGGGAAAAAAGAAGAGTTTAAAGGAAATTTGGCAATTTTAA<br>GAAGGCAGAACCCTGATAGGATAAGGGTTCTGTGA<br>ATGCCTGAGATACAAATTATTGCCAAGGATAATCATAAAACCTTGGTAACC<br>ACAGAGGGGAACTTCTGCAAACCTTTCAGAAGCGTCAGTTGTGTTGGTGAA<br>AGTGGCTGCCAGCGATGTATTGGTAGTAAATAGGGAGGGTACCAATGCAG<br>TCATACGTCTGAAAAATGGCGAGACTATTGTTATTGAAGGCTTCTTTAGTG<br>GAACAGCTGAGCCTAAAGATAATAGTCTGGTTTTCCAAGATGAAAATGGAC<br>AGTTGATTTGGGCAAATTCAAAGATGCTGAAAATGATGCAGATGCTGATA                                                                                                                                                                                                                                                                                                                                                                                                                                                                                                                                                                                                                                                                                                                               |

GTGATGCGGACGCAGATGCTGACAGTGACGTGCGAACCACAAGCACTTTTA  
GGTGAAGATTTACCAGCAGCTCTACCAGCAGAAGCTCCACAAGAGTTGGT  
ATCTGATGTTATTTACCAGCCTATTTCTTCAATTGAACCTCTACTTTATCAT  
GATGCAGGCGTGAACCCATGGTTATGGGCTGCTATTCCACTAGTTGCAGG  
CGGTATTATCGCTGCAGCATCAAATCATGATAGTGATGATGATTCTTCAGC  
ACCTGTTGATAACCACTCCACCAAGTACCGATGGCGTAACTTTCTCGGTTG  
ACCCTGTTACTTCTGATAATGTGATTAATGCATCAGAAGCATCCGGTAATG  
TCACTATTACAGGTGTTTTGAAAAACATTCCAGCAGATGCGGCCAACACG  
GCCGTTACAGTTGTTAATGGGGTAACTTATAATGCGACTGTAGATAAAA  
GCAGCAGGTACATGGACAGTAAGTGTACCGGGCAGTGGCTTAGTTGCGG  
ATGCAGATAAGACGATTGATGCCAAAGTAACGTTTACAGATGCAGCAGGT  
AACAGCAGCAGTGTTAACGATACACAACTTATACACTTGATAACCACTGCA  
CCAAATACACCAGTGATTGACCCAGTTAACGGGACAGACCCGATTACAGG  
TACAGCAGAACCTGGTTCAACAGTGACTGTGACTTATCCGGACGGTAGTA  
CGAAAACCTGTTGTTGCAGGACCAGATGGTACTTGGACTGTGCCAAACCCA  
GGTTTGAATGATGGCGATGAAGTTACAGCTGTAGCAACGGACCCTGCTGG  
CAATACATCAGGACCAGGAACAGCTATTGTTGATGCAGTTGGTCCAAATA  
CGGATGGTGTTAATTTTGCTGTTGATTCCGTAACAGCTGATAATGTGATTA  
ATGCATCAGAAGCGGCTGGCAATGTCACGATTACAGGTATATTGAAAAAC  
GTTCCCTCAGATGCGGCTGCTACAGCCGTTACAATTGTTAATGGGGTA  
ACTTATACTGCAACTGTAGACAGTGCAGCAGGTACATGGACAGTAAGTGT  
ACCAGGTAGCGGTTTGGTTGCTGATACTGATAAAACGATTGATGCTAAAGT  
AACCTTCACTGATGCAGCAGGTAATAGCAGCACAGTTAACGATACACAAA  
CTTATACACTGGATACAGCTGCTCCTTCAGCGCCAGTAATTGACCCTGTTA  
ACGGGACAGACCCGATTACAGGTACTGCAGAACCTGGTTCAACCGTAACA  
GTAACCTATCCTAATGGTGACACAGCAACAGTTGTAGCAGGACCTGATGG  
CAGCTGGTCAGTACCAAACCCAGTTTTAAATGATGGTGACGAAGTTGAGG  
CAATTGCTACAGATCCAGCAGGCAACCCATCTTTACCAGGTACAGCTATT  
GTTGATGCAGTTGGTCCAAATACCGATGGCGTTAACTTCACGGTTGATTCA  
GTAACAGCTGACAATGTGATTAATGCATCAGAAGCGTCAGGCAACGTTAC  
TGTTACAGGCGTATTGAAAAATGTTCCGGCAGATGCAGCAAATACAGTGG  
TCACTGTTGTGATCAATGGCCAGACGTATACTGCAACTGTAGATAGCACA  
GCGGGCACATGGACAGTAAGCGTACCAGGTAGTGACTTGACTGCGGATG

|                   |                             |             |   |                                         |                                                                                                                                                                                                                                                                                                                                                                                                                                                                                                                                                                                                                                                                                                                                                                                                                                                                                                                                                                                                                       |
|-------------------|-----------------------------|-------------|---|-----------------------------------------|-----------------------------------------------------------------------------------------------------------------------------------------------------------------------------------------------------------------------------------------------------------------------------------------------------------------------------------------------------------------------------------------------------------------------------------------------------------------------------------------------------------------------------------------------------------------------------------------------------------------------------------------------------------------------------------------------------------------------------------------------------------------------------------------------------------------------------------------------------------------------------------------------------------------------------------------------------------------------------------------------------------------------|
| <i>group_1296</i> | hypothetical protein        | A1          | N | domain, Protein                         | CAGATAAGACAATTGATGCCAAAGTAACGTTTACAGATGCAGCAGGTAATA<br>GCAGCAGTGTTAACGATACACAACTTATACACTTGATACCACTGCACCTG<br>ATGCACCAGTAATTAACCCGGTTAACGGGACAGATCCAATTACAGGTA<br>GCAGAGCCTGGTTCAACCGTAACAGTAACCTATCCTAATGGTGACACAGC<br>AACAGTTGTAGCAGGACCTGATGGCAGCTGGTCAGTATGCACCCGGTGCTT<br>GA<br>ATGCGTGCTGAAGGTGCATTTAACTTAGATATTCTTGGTTATAGCTGGGAT<br>ACATCAAAAGGTGAAAACCCTGACCTTACTTTACTTGGTTCAAGTGCCAAC<br>TGGAAAAACATGCTACTAGCAACAAAATGACAGCAGGCACATTGCTTGAT<br>CTATCTGGCACAACAACAACACTGGTTAA                                                                                                                                                                                                                                                                                                                                                                                                                                                                                                                                 |
| <i>group_1299</i> | hypothetical protein        | A1, A2      | / | hypothetical protein                    | ATGACTGTATATTTTCCATCATTATCAGACTTTGCAGTTCCAATGATTTTT<br>CAGATGAATCTTTAACGGTGACAGTTGAATTAGCCTCTGTCAAACCTGTAA<br>TAGTTTTACCGTTAGAAGAAATAGCATGTGTTAAAGTAGGAGCTGTAATAT<br>CAGAAGCGATAAGCTCTTGTTTAACTGTACTATTACCGGCAGTATCTTGA<br>ATGAACCCATTCAAAGGCCGGCATTTCAGCGTGACATCATTCTGTGGGC<br>CGTACGCTGGTACTGCAAATACGGCATCAGTTACCGTGAGCTGCAGGAGA<br>TGCTGGCTGAACGCGGAGTGAATGTCGATCACTCCACGATTTACCGCTGG<br>GTTTCAGCGTTATGCGCCTGAAATGAAAAACGGCTGCGCTGGTACTGGC<br>GTAACCCTTCCGATCTTTGCCCGTGGCACATGGATGAAACCTACGTGAAG<br>GTCAATGGCCGCTGGGCGTATCTGTACCGGGCCGTCGACAGCCGGGGC<br>CGCACTGTCGATTTTTATCTCTCCTCCCGTCGTAACAGCAAAGCTGCATAC<br>CGGTTTCTGGGTAAAATCCTCAACAACGTGAAGAAGTGGCAGATCCCGCG<br>ATTCATCAACACGGATAAAGCGCCCGCCTATGGTCGCGCGCTTGCTCTGC<br>TCAAACGCGAAGGCCGGTGCCCGTCTGACGTTGAACACCGACAGATTAA<br>GTACCGGAACAACGTGATTGAATGCGATCATGGCAAACCTGAAACGGATAA<br>TCAAACGCCACGCTGGGATTTAAATCCATGAAGACGGCTTACGCCACCATC<br>AAAGGTATTGAGGTGATGCGTGCACTACGCAAAGGCCAGGCCTCAGCATT<br>TTATTATGGTGATCCCCTGGGCGAAATGCGCCTGGTAAGCAGAGTTTTTG<br>AAATGTAA |
| <i>group_13</i>   | IS6 family transposase IS15 | A2, A3, A14 | L | Transposase and inactivated derivatives | GTGACATCGGCTGTACCTGTACCCACTACGGTTCCTACCAGTTCTTAACT<br>GTTACTGTTGCATTGGCCTCAGTCACACCGGTAATTGCTTTACCTGCGGC<br>ATCAATCGTTGCAGTCAGACTTGAAGGTGCTGTAATGTCTGGTGCAACTAT                                                                                                                                                                                                                                                                                                                                                                                                                                                                                                                                                                                                                                                                                                                                                                                                                                                       |
| <i>group_1300</i> | hypothetical protein        | A1, A2      | / | hypothetical protein                    |                                                                                                                                                                                                                                                                                                                                                                                                                                                                                                                                                                                                                                                                                                                                                                                                                                                                                                                                                                                                                       |

|                   |                                  |    |   |                                                             |                                                                                                                                                                                                                                                                                                                                                                                                                                                                                                                                                                                                                                                                                                                                                                                                                                                                                                                                                                                                                                                                                                                                                                                                                                                                                                                                                                                                                                                                                                                                                                                                                                                                                                                                                                                     |
|-------------------|----------------------------------|----|---|-------------------------------------------------------------|-------------------------------------------------------------------------------------------------------------------------------------------------------------------------------------------------------------------------------------------------------------------------------------------------------------------------------------------------------------------------------------------------------------------------------------------------------------------------------------------------------------------------------------------------------------------------------------------------------------------------------------------------------------------------------------------------------------------------------------------------------------------------------------------------------------------------------------------------------------------------------------------------------------------------------------------------------------------------------------------------------------------------------------------------------------------------------------------------------------------------------------------------------------------------------------------------------------------------------------------------------------------------------------------------------------------------------------------------------------------------------------------------------------------------------------------------------------------------------------------------------------------------------------------------------------------------------------------------------------------------------------------------------------------------------------------------------------------------------------------------------------------------------------|
| <i>group_1302</i> | hypothetical protein             | A1 | S | Ribonuclease toxin, BrnT, of type II toxin-antitoxin system | TATTTTTGGTGCGGTAGCATTACCCGCTTTATCTGTCGCTGTTATACTTAA<br>CTTTCGCCATTTAGATAA<br>ATGGAACAGTATTTTGAATGGGATGAGGCTAAGAATCGAAAGAATCAGAA<br>AAAGCATGATATCTCTTTGCAAAGCTGCAAGCCTTGTTTTTGAAGATCCATTA<br>CGGATCTCAATCCAAGACAGATATACTAATGGTGAAGAACGTTGGCAAAC<br>CATTGGACGAGTTAAAGGCGTACTAATGTTATTGGTGGCTCACACCATTTT<br>TGATGAAGATGACTGTGAAATCATCCGAATCATTAGTGCAAGGCAAGTCA<br>CTAAAGCGGAGCGAAACAAATATGAGCATGGTTAG<br>ATGAGCATGGTTAGATACTCACACAAAGAGCTGAATGAGAAATTTGGTGA<br>GAAGCAAGATGCTGAAATTCAACGCTTGCTTGCTAAAGGCACGGTTCCTG<br>ATGATCAGCTAGATCTATCAGATATTCCTGAAATTACAGACTGGAGCAATG<br>CTGTACGCCAAAATCAATTTTACCGCCCAGTAAAGCAACAAACTTCAATTC<br>GGTTAGATGCTGATGTACTTGCTTGGTTCAAAGCACAAGGCAAAGGTTAT<br>CAAACACGTATGAATGAAATTTTACGAGATGCTATGCTAAAAGAATTA<br>AATCATCAATAA<br>ATGCTAAATAAAAGTAAACTATTTTTAGCTTTAATTACTTTAGGGCCTCGA<br>AAATTTTATTGGCAGCTGAAGGGCCTGTTACTACCTTAAATACAATAGTATT<br>AACTGCACAATCTGATGAGTTAGGGTCTGAGCTGTTAGGCAAAAGTCTAA<br>ATGTTAGTAATCAGTTTATTGATACTAGTAAACTTAAACAGCGTTCCGACAAC<br>TCTAGGGGATGCCTTGGGTACGGAATTAGGAATTCATTCTAATCAATATGG<br>AGGTGGAGCATCTACTCCTATTATTCGTGGGCAGGAAGGAAAACGTATTA<br>AAGTTTTACAGAATAATGCTGACGTGTTGGATATGTCTAATATGTCTCCAG<br>ATCACGCTGTCACAGTTGAACCAAGTTTAGCTAAGTCTATTGAAATTATAC<br>GTGGTGCAAGTACCCTTTTGTATAGTTCAAATAGTGCGGCAGGGGTAGTC<br>AATGTCATTGACTATAAAATCCAACCCAAATGCCTCAAGACGGATTAGAG<br>GGTAATACTACATTACGTTTTAATACTGGCAGTAATGAGAAGTTGACCACA<br>GCAGGTGTAACAGTTGGCTTAAGCCACATGTAGCTTTACGGGCAGAAGG<br>GTTATATCGTAATGCTGGTAACTATAAACTCCTCATTACCAGTCTAGCTCT<br>TATAATTCCTTTAGAAGATCTTGAAAACCAAACAGTATTTATAAAAAATTTAA<br>ATATTTACCAGAAAGCTGGGCAGAGTCGAGAGTAGGTACGCTTGGATTAT<br>CCTGGATAGACGATAATACTTATTTAGGAGTTTCTTATACACATCGTCATG<br>ATGAATATGGTTTACCAGCCCATAGCCATTTATATGAAGGTTGTGGTGCCT<br>CTGCAATCGGTATCGATTCACGAATTAGTGGATTAATAAATTATCTTTTATA |
| <i>group_1303</i> | hypothetical protein             | A1 | S | BrnA antitoxin of type II toxin-antitoxin system            |                                                                                                                                                                                                                                                                                                                                                                                                                                                                                                                                                                                                                                                                                                                                                                                                                                                                                                                                                                                                                                                                                                                                                                                                                                                                                                                                                                                                                                                                                                                                                                                                                                                                                                                                                                                     |
| <i>group_1304</i> | putative TonB-dependent receptor | A1 | P | Outer membrane receptor proteins mostly Fe transport        |                                                                                                                                                                                                                                                                                                                                                                                                                                                                                                                                                                                                                                                                                                                                                                                                                                                                                                                                                                                                                                                                                                                                                                                                                                                                                                                                                                                                                                                                                                                                                                                                                                                                                                                                                                                     |

group\_  
1305

hypothetical  
protein

A1

/

hypothetical protein

TTATCCTCAATTGATGGATGAGCAAGATATTAATTACATAAATCCACGTCCT  
GATTGTCATCAGCATAATCATATTCATGAACTAATTTCTCTCATAATGCTC  
CTTATATTGATTTAAATACTCGACGTTATGATGTGCGTGGAGAATTCACTC  
AACCATTTACCGGTATTGACAAAATTCGTACCTCATTGAGTTATATAGATTA  
TTTTCACAATGAACTCGAGGGAGATAAGATTACTAACTTTTTTAAAAATACA  
GGAAAAGTAGGCCGCATAGAGTTATCACATCAGCCATTAGGGGAATTAAC  
CGGTATCTTGGGGCTACAATATTTGGAACAGGATAATAGTGCTTTATCACC  
AGTCCATTCTCAAGAAGGCCATAACCACCTATCTAGATAATCAGCAGCTATT  
AAATCGAAATGTCACTAAAACTTTAGTGTATTTGGCCTAGAAAAATATAAC  
TGGAACGACTTTACTTTTGAAGTGGTCTCGTATAGAAAAGCAGAAAAGTT  
AGTATGGATTATGATATAGAAAAATTAAGATTCAATGAAACCTTGGCCTA  
ATAAATATAACAGTCCTTATGTAGAAAAAATAATAAAATCAGGGCTCAAAA  
TTTTAAATCTATTTTAGAAGCTGTTCAACCTAACAAAGAAACAGCTTTTTCT  
TATGCAGGTACAGTCCACTGGAGATTTGCTCCAAATTATATCTTATCATTAA  
CAGGTACACATCAAGAAAGATTACCTAATGCACAAGAAATGTATACTCATG  
GTATGCATCTCGCTACTAATTCTTTTGAATAGGTAACCGCTTTCTAAGAAA  
AGAGAAATCCAATAATTTAGAAATCAGTCTGGCCTATAAGGATGATTTACT  
TGATTATCAAATCAGTACTTACTATTATGATTTTGATAACTATATATATTTAC  
AGACACTCAATGAAGTTTTAGGAACTACAAAAGTTAGAGATCAGCATACAC  
TACGTATTAATCATTATAGCCAGTCTGCTGCTAATTTTTATGGATTAGAGG  
GCAACATAGGGTATCAATTTAATTCTGTTTATCACGGCTCTCTTTTTGGAG  
ATTATGTGAAAGGCCGTTTAAACAATTTACCTGATGCTGTAATTGCATACG  
ATATCTGGAATAGAGAACCGACTTTAGCTCCCCAAAAGGATCGTTACACTC  
CTAGATTACCTCCTGCTCGTTTGGGTACACGACTAAAAGCTGATTTTGATG  
AATCGCTTAAAGGTGAAATAGAATATTATCGAGTCTTTAAACAAGATAATAT  
TTCTAAATTTGAGCAGGTTACATCAGGTTATAATATGCTTAATATGACTTTA  
GCATATAAAAATAAGCTATCTCACACAGAATATGATTTATTCTTTAAAGCGA  
ATAATTTACTTGATCAGAAAGTCTATGCCCATGAAACATTTTTGCCATATAT  
TCCCCAAATTGGAAGAAATTTAGTTTAGGCTTAAATCTTAATTTCTAG  
ATGAAATTAGCAGAAGCTCTTACTTTCGAAGTGATCAACAAAAAAAATT  
ATTTCACTAAAACAACGTATCAATGCAAATGTATTGGTACAAGATGGTGAT  
CAACCATCTGAAGATCCAAATGAACTACTAAAACAAGTATTTTCTTTAATTC  
AAGAATTTCAAAAATTAAGTTATGCAATTCATGAACTAATGCTTTAACAAA

|                   |                      |    |   |                               |                                                                                                                                                                                                                                                                                                                                                                                                                                                                                                                                                                                                                                                                                                                                                                                                                                                                                                                                                                                                                                                                                                                                                                                                                                                                                                                                                                                                                                                                                                                                                                                                                                                                                                                                                                                                                                       |
|-------------------|----------------------|----|---|-------------------------------|---------------------------------------------------------------------------------------------------------------------------------------------------------------------------------------------------------------------------------------------------------------------------------------------------------------------------------------------------------------------------------------------------------------------------------------------------------------------------------------------------------------------------------------------------------------------------------------------------------------------------------------------------------------------------------------------------------------------------------------------------------------------------------------------------------------------------------------------------------------------------------------------------------------------------------------------------------------------------------------------------------------------------------------------------------------------------------------------------------------------------------------------------------------------------------------------------------------------------------------------------------------------------------------------------------------------------------------------------------------------------------------------------------------------------------------------------------------------------------------------------------------------------------------------------------------------------------------------------------------------------------------------------------------------------------------------------------------------------------------------------------------------------------------------------------------------------------------|
| <i>group_1306</i> | hypothetical protein | A1 | / | hypothetical protein          | <p>ATTAATGATGGCCGTTCTCTACTTGCTTTATTGACTTTGCGTGATGAATTT<br/>GTAGAACAGCACAAAACCCTAACTGCAGCAATAAGTAATACATCTCGTGAA<br/>TCTGATCGTTATAGTACGCGGGAAATAAAGTGGCATAAAGTTATCCAGTT<br/>TCATCATTACAAAACAAGCTGATGATATTAGTCTTAAATTACGTGATTTAA<br/>ACGTGTTAATTCAGTCGACTAATTGGAAAATTGATTTGATTGAAGCCTAA<br/>ATGTCTAATAATAAACCTTTGAAAAATAGTACTAAATTACTTGTTAACTTAG<br/>ACAAGTTTATATTTTTAGTCAATGCTGCCGATAGCCTAGAAGAAATTGAAAT<br/>TATTAGAGATTTATGCTGTGAATATTTTTACATTGTAAGAGGCCAAGCTAT<br/>TACATTGATATTTTTGACAATGCTTATTGGATAAAAATATTACGAAATAGCTT<br/>AA</p> <p>ATGGCTAAGAGCTTACAAGAATTATTGGCTAGTCGCTCTCCAGAGAGTCA<br/>AGCTCGTATTCAAAAATGGCTGATGAATTACTTTTAGAAAAGTCAGCTTCA<br/>CCTTATCCGAGAAGAGTTAGAAATTTCCAGAAAAGAACTAGCTGCAACCCT<br/>TGGAATTAACAGCCGTCATTATCAGCAATCGAAAATCGTGGTCATGATCT<br/>TAAAATTTCAACGATGAAAAAGTATGTTGAAGCAATGGGTGGAAAACCTTCG<br/>TATTGATGTAGAGCTTCCAACAGGAAAACACATAGGGTTCAATGTCTAA<br/>ATGAAAAGCCTTACAGTTCTTGAGCTTTCTAAGCTTTACAATATTAATCGAC<br/>AAACCATTTACAACAATATAAAGAAAGGTATTTTAAGTAAAAATTCTGACAA<br/>TAAGATTGATCTTGCAGAAGCGATCCGGGTATTTGGTGAGCCAGTACAAA<br/>AACAGAGTGTAAGAAAGAACTGTAAGAGTAGACAGTCCAACCTTCGGCAGAA<br/>GTTTTACTCCTTAGACAGCAGATAGACCTACTAAAAAATCAGCTAGATGAT<br/>GCAAAAAATAGAGAAAGCTTCTATCAAAATCAAATTGAAACTATGCAACGC<br/>CTATTGGAAGCTCCAAAAACCAATACAACACAATCTGATGATCCTGGATCA<br/>ACACAGGCAGAATCCACAGTAGAAGAAAAAGAGGACGTCATAGCTATGCC<br/>TCCTAAGGAGTCAGAGGTTATCGAGAATAAGCGTATTCCAGTCCCTGAAC<br/>ATATTGAGCCAGAACCAGAAAAAAGGGGCTTCTGGAGCCGTTTTTTCAAG<br/>CCCTATGGATGA</p> <p>ATGAGTGAATTAATCGTAAAGGATAATGCTCTAATTCAAGCAAGTTATACC<br/>TTAGATACAGTTGAACAAAGACTGATCCTATTAGCCATTGCTGAAGCTCGA<br/>GAAACTGGACATGGGATAACTGAAAATAGTCTTTTAGAAGTACATGCAAGT<br/>AGTTATATAAATACTTTTAATGTCGAGAAACATACCGCTTATACCGTACTCA<br/>GAGAGGCATCTAAAAGCTTATTTGATCGCTATGTCACATACCATGACATTA<br/>ATCCTAAGACAGGTAAGGATCGTAGCTTTCATTGTCGTTGGGTGACAAA</p> |
| <i>group_1307</i> | hypothetical protein | A1 | K | Helix-turn-helix domain       | <p>ATGGCTAAGAGCTTACAAGAATTATTGGCTAGTCGCTCTCCAGAGAGTCA<br/>AGCTCGTATTCAAAAATGGCTGATGAATTACTTTTAGAAAAGTCAGCTTCA<br/>CCTTATCCGAGAAGAGTTAGAAATTTCCAGAAAAGAACTAGCTGCAACCCT<br/>TGGAATTAACAGCCGTCATTATCAGCAATCGAAAATCGTGGTCATGATCT<br/>TAAAATTTCAACGATGAAAAAGTATGTTGAAGCAATGGGTGGAAAACCTTCG<br/>TATTGATGTAGAGCTTCCAACAGGAAAACACATAGGGTTCAATGTCTAA<br/>ATGAAAAGCCTTACAGTTCTTGAGCTTTCTAAGCTTTACAATATTAATCGAC<br/>AAACCATTTACAACAATATAAAGAAAGGTATTTTAAGTAAAAATTCTGACAA<br/>TAAGATTGATCTTGCAGAAGCGATCCGGGTATTTGGTGAGCCAGTACAAA<br/>AACAGAGTGTAAGAAAGAACTGTAAGAGTAGACAGTCCAACCTTCGGCAGAA<br/>GTTTTACTCCTTAGACAGCAGATAGACCTACTAAAAAATCAGCTAGATGAT<br/>GCAAAAAATAGAGAAAGCTTCTATCAAAATCAAATTGAAACTATGCAACGC<br/>CTATTGGAAGCTCCAAAAACCAATACAACACAATCTGATGATCCTGGATCA<br/>ACACAGGCAGAATCCACAGTAGAAGAAAAAGAGGACGTCATAGCTATGCC<br/>TCCTAAGGAGTCAGAGGTTATCGAGAATAAGCGTATTCCAGTCCCTGAAC<br/>ATATTGAGCCAGAACCAGAAAAAAGGGGCTTCTGGAGCCGTTTTTTCAAG<br/>CCCTATGGATGA</p> <p>ATGAGTGAATTAATCGTAAAGGATAATGCTCTAATTCAAGCAAGTTATACC<br/>TTAGATACAGTTGAACAAAGACTGATCCTATTAGCCATTGCTGAAGCTCGA<br/>GAAACTGGACATGGGATAACTGAAAATAGTCTTTTAGAAGTACATGCAAGT<br/>AGTTATATAAATACTTTTAATGTCGAGAAACATACCGCTTATACCGTACTCA<br/>GAGAGGCATCTAAAAGCTTATTTGATCGCTATGTCACATACCATGACATTA<br/>ATCCTAAGACAGGTAAGGATCGTAGCTTTCATTGTCGTTGGGTGACAAA</p>                                                                                                                                                                                                                                                                                                                                                                                                                                                                                                                                     |
| <i>group_1309</i> | hypothetical protein | A1 | / | hypothetical protein          | <p>ATTAATGATGGCCGTTCTCTACTTGCTTTATTGACTTTGCGTGATGAATTT<br/>GTAGAACAGCACAAAACCCTAACTGCAGCAATAAGTAATACATCTCGTGAA<br/>TCTGATCGTTATAGTACGCGGGAAATAAAGTGGCATAAAGTTATCCAGTT<br/>TCATCATTACAAAACAAGCTGATGATATTAGTCTTAAATTACGTGATTTAA<br/>ACGTGTTAATTCAGTCGACTAATTGGAAAATTGATTTGATTGAAGCCTAA<br/>ATGTCTAATAATAAACCTTTGAAAAATAGTACTAAATTACTTGTTAACTTAG<br/>ACAAGTTTATATTTTTAGTCAATGCTGCCGATAGCCTAGAAGAAATTGAAAT<br/>TATTAGAGATTTATGCTGTGAATATTTTTACATTGTAAGAGGCCAAGCTAT<br/>TACATTGATATTTTTGACAATGCTTATTGGATAAAAATATTACGAAATAGCTT<br/>AA</p> <p>ATGGCTAAGAGCTTACAAGAATTATTGGCTAGTCGCTCTCCAGAGAGTCA<br/>AGCTCGTATTCAAAAATGGCTGATGAATTACTTTTAGAAAAGTCAGCTTCA<br/>CCTTATCCGAGAAGAGTTAGAAATTTCCAGAAAAGAACTAGCTGCAACCCT<br/>TGGAATTAACAGCCGTCATTATCAGCAATCGAAAATCGTGGTCATGATCT<br/>TAAAATTTCAACGATGAAAAAGTATGTTGAAGCAATGGGTGGAAAACCTTCG<br/>TATTGATGTAGAGCTTCCAACAGGAAAACACATAGGGTTCAATGTCTAA<br/>ATGAAAAGCCTTACAGTTCTTGAGCTTTCTAAGCTTTACAATATTAATCGAC<br/>AAACCATTTACAACAATATAAAGAAAGGTATTTTAAGTAAAAATTCTGACAA<br/>TAAGATTGATCTTGCAGAAGCGATCCGGGTATTTGGTGAGCCAGTACAAA<br/>AACAGAGTGTAAGAAAGAACTGTAAGAGTAGACAGTCCAACCTTCGGCAGAA<br/>GTTTTACTCCTTAGACAGCAGATAGACCTACTAAAAAATCAGCTAGATGAT<br/>GCAAAAAATAGAGAAAGCTTCTATCAAAATCAAATTGAAACTATGCAACGC<br/>CTATTGGAAGCTCCAAAAACCAATACAACACAATCTGATGATCCTGGATCA<br/>ACACAGGCAGAATCCACAGTAGAAGAAAAAGAGGACGTCATAGCTATGCC<br/>TCCTAAGGAGTCAGAGGTTATCGAGAATAAGCGTATTCCAGTCCCTGAAC<br/>ATATTGAGCCAGAACCAGAAAAAAGGGGCTTCTGGAGCCGTTTTTTCAAG<br/>CCCTATGGATGA</p> <p>ATGAGTGAATTAATCGTAAAGGATAATGCTCTAATTCAAGCAAGTTATACC<br/>TTAGATACAGTTGAACAAAGACTGATCCTATTAGCCATTGCTGAAGCTCGA<br/>GAAACTGGACATGGGATAACTGAAAATAGTCTTTTAGAAGTACATGCAAGT<br/>AGTTATATAAATACTTTTAATGTCGAGAAACATACCGCTTATACCGTACTCA<br/>GAGAGGCATCTAAAAGCTTATTTGATCGCTATGTCACATACCATGACATTA<br/>ATCCTAAGACAGGTAAGGATCGTAGCTTTCATTGTCGTTGGGTGACAAA</p> |
| <i>group_1310</i> | hypothetical protein | A1 | L | Initiator Replication protein | <p>ATTAATGATGGCCGTTCTCTACTTGCTTTATTGACTTTGCGTGATGAATTT<br/>GTAGAACAGCACAAAACCCTAACTGCAGCAATAAGTAATACATCTCGTGAA<br/>TCTGATCGTTATAGTACGCGGGAAATAAAGTGGCATAAAGTTATCCAGTT<br/>TCATCATTACAAAACAAGCTGATGATATTAGTCTTAAATTACGTGATTTAA<br/>ACGTGTTAATTCAGTCGACTAATTGGAAAATTGATTTGATTGAAGCCTAA<br/>ATGTCTAATAATAAACCTTTGAAAAATAGTACTAAATTACTTGTTAACTTAG<br/>ACAAGTTTATATTTTTAGTCAATGCTGCCGATAGCCTAGAAGAAATTGAAAT<br/>TATTAGAGATTTATGCTGTGAATATTTTTACATTGTAAGAGGCCAAGCTAT<br/>TACATTGATATTTTTGACAATGCTTATTGGATAAAAATATTACGAAATAGCTT<br/>AA</p> <p>ATGGCTAAGAGCTTACAAGAATTATTGGCTAGTCGCTCTCCAGAGAGTCA<br/>AGCTCGTATTCAAAAATGGCTGATGAATTACTTTTAGAAAAGTCAGCTTCA<br/>CCTTATCCGAGAAGAGTTAGAAATTTCCAGAAAAGAACTAGCTGCAACCCT<br/>TGGAATTAACAGCCGTCATTATCAGCAATCGAAAATCGTGGTCATGATCT<br/>TAAAATTTCAACGATGAAAAAGTATGTTGAAGCAATGGGTGGAAAACCTTCG<br/>TATTGATGTAGAGCTTCCAACAGGAAAACACATAGGGTTCAATGTCTAA<br/>ATGAAAAGCCTTACAGTTCTTGAGCTTTCTAAGCTTTACAATATTAATCGAC<br/>AAACCATTTACAACAATATAAAGAAAGGTATTTTAAGTAAAAATTCTGACAA<br/>TAAGATTGATCTTGCAGAAGCGATCCGGGTATTTGGTGAGCCAGTACAAA<br/>AACAGAGTGTAAGAAAGAACTGTAAGAGTAGACAGTCCAACCTTCGGCAGAA<br/>GTTTTACTCCTTAGACAGCAGATAGACCTACTAAAAAATCAGCTAGATGAT<br/>GCAAAAAATAGAGAAAGCTTCTATCAAAATCAAATTGAAACTATGCAACGC<br/>CTATTGGAAGCTCCAAAAACCAATACAACACAATCTGATGATCCTGGATCA<br/>ACACAGGCAGAATCCACAGTAGAAGAAAAAGAGGACGTCATAGCTATGCC<br/>TCCTAAGGAGTCAGAGGTTATCGAGAATAAGCGTATTCCAGTCCCTGAAC<br/>ATATTGAGCCAGAACCAGAAAAAAGGGGCTTCTGGAGCCGTTTTTTCAAG<br/>CCCTATGGATGA</p> <p>ATGAGTGAATTAATCGTAAAGGATAATGCTCTAATTCAAGCAAGTTATACC<br/>TTAGATACAGTTGAACAAAGACTGATCCTATTAGCCATTGCTGAAGCTCGA<br/>GAAACTGGACATGGGATAACTGAAAATAGTCTTTTAGAAGTACATGCAAGT<br/>AGTTATATAAATACTTTTAATGTCGAGAAACATACCGCTTATACCGTACTCA<br/>GAGAGGCATCTAAAAGCTTATTTGATCGCTATGTCACATACCATGACATTA<br/>ATCCTAAGACAGGTAAGGATCGTAGCTTTCATTGTCGTTGGGTGACAAA</p> |

group\_  
1311

hypoth  
etical  
protein

A1

U

MobA/MobL family

ATTGGGTATGAATCTCAATCAGGAATTATTTTCCTACGATTCACCCAAGAT  
ATCGTTCCACTCATAACTCGACTTGAAGAAAATTTCACTAAATATGAATTGC  
AGCAGGTTTCTAGGTTAAGTAGCTCATATGCTATTCGGCTATACGAGCTAT  
TAATTC AATGGAGATCTGCCGGA AAAACGCCACTTTTTGATCTATCTATCT  
TTAGACAACA ACTTGGTGTCAAACCTCATCAATACAAAACAATGAGTAACT  
TTAAAACATATGTTTTAGATTTTGCTCTTAAGCAGGTA AATGAGTTAACCGA  
TATAACAGCTAAATATGAGCAACATAAAAAAGGGCGTTCTATTT CAGGTTT  
TTCATTCACTTTCAAACAGAAAAAATGAGTAATCTGCCAATAAAAAATAAG  
CGTGACCCAGACACTATAGATATTTTCTCAAAAATGACAGATGCTCAACGC  
CATCTGTTTTCCACAAA CTGTCAGAACTTCCTGAAATGGGAAAAGTATTCT  
CATGGTACAGAAAGCTATCCGCAATTCGCTGTACGCATTGCAGAAATGCT  
TCAAAACCCAGAAAAGTTTAAAGAACTCTATCCTTATCTCCAAAAGTAGG  
CTTCAAAGCTGCATAG  
ATGGCCAGCTACCACTTCAGCGTCAA AAGCAAAAATAAGGGCTATGCGAC  
CGGCCATTATCTCTACATTTCCCGGTGATGCAGTATGAAGGCATCCGCA  
AAACCAGCAATGAGACCATAGAACATATTGAACCTGGTCGATGTATGCCT  
GCCTTTGTAAAAGATCCCATTTGATTTTTGGCAGGCAGCAGATACGTATGAA  
CGAGCCAATGCCAAGGCCTACATGGAGTATGAAATTGCCCTACCGAATGA  
GTTACAGT CAGAACAGCGTAAAACGCTCATAGAGACGTTTTT TAGACAAACA  
TATAGTTCCACAGCAATATCCGCACTCATACGCCATACACAACGTAAATC  
ACGTATCAGTGGCGAAGATCAGCCTCATTGTCATCTGATGTTCTCGCTAAA  
AGCGGATGACGGCATTGAACGCAGCGCAGAACAGTACTTCAAACGCTATA  
ACCCTCAAGATCCAGCCAAAGGCGGTGCCAAAAAATCCA ACTTCAAGAT  
GGCCATGAAGACTATTCCACTTTTTT GATCTATATCCGAAAACAATGGGAA  
AATCATTTGAATGATGCCCTTGACAGCACTGCCCCACCGTCACTACAC  
ACTGGATGGCCAAGACATCACCATCAAAAATCAGGTTTCAGCAGACAGCT  
ATGAAAAATATAACGAGATCCACAGCACGCTATACCTTCCAGAGCCAAAAC  
TAGGCGTTGGACAACAAAATGCGACAGCGGAATATCTCGCCCAAATCCAA  
AAAATCAGAGAACACAACCAGCAAGAACGAGA ACTCGAAGAACGCCAAAA  
GCAATTAGATCAACAACATGAATATTTTTATAGTGCTGAAAACAACCCATTT  
TCATCATTGGAAGTCATGTATTACCTGAATTACTTAATCAAGAATGCAACAA  
ATAAGGACAAACTAAAAAATGATTTGAATGAAATTATCAAAAACCAAGGCC  
CTATACTTAAACAAGAAGCTTGGTCCATCTACGAAATGAATGAAAACTAG

|                   |                      |            |   |                      |                                                                                                                                                                                                                                                                                                                                                                                                                                                                                                                                                                                                                                                                                                                                                                                                                                                                                                                                                                                                                                                                                                                                                                                                                                                                                                                                                                                                                                                                                                                                                                                                                                                                                                                                                             |
|-------------------|----------------------|------------|---|----------------------|-------------------------------------------------------------------------------------------------------------------------------------------------------------------------------------------------------------------------------------------------------------------------------------------------------------------------------------------------------------------------------------------------------------------------------------------------------------------------------------------------------------------------------------------------------------------------------------------------------------------------------------------------------------------------------------------------------------------------------------------------------------------------------------------------------------------------------------------------------------------------------------------------------------------------------------------------------------------------------------------------------------------------------------------------------------------------------------------------------------------------------------------------------------------------------------------------------------------------------------------------------------------------------------------------------------------------------------------------------------------------------------------------------------------------------------------------------------------------------------------------------------------------------------------------------------------------------------------------------------------------------------------------------------------------------------------------------------------------------------------------------------|
| <i>group_1312</i> | hypothetical protein | A1         | / | hypothetical protein | <p>AAGACTCAAGACGTAACAGTACCCCATGTTTTGAGTTTCGAGGTGCATTCA<br/> CTTCCTGAATACGTATTACCGATACAAAATACGCCTCCCAAACGCACTCAA<br/> TCAGAACCAGTACAACCTAAAGCTGATGATTATGATTACGGTGGCCCTGG<br/> TTTTTAA</p> <p>ATGCCTGTATGGCTGAAAAATCCGGTTGAAGGGGGTCAAGGGGGAAGCG<br/> CCCCATTGCGTACTAGTTTTCTCCGATGAGGAGAACTGTCAAGTGCGAAT<br/> TATTTAATATAA</p> <p>ATGGAAATGGAAAAAGCAAAAAGCGTGGTCGACCTGCTCAGTTGTTACA<br/> GATTGCTGAGTTACATGCATTTGTAGAGTTTTTAGAACAGCAAGAACAGCT<br/> TTCTGATCTTCAATCTCAAGTGTTAAAGGCTTTAAATAGTGTTGATTGTAAT<br/> TTTGAGGGGCTAACTCAGACAGATCAGGTTCTGGTCAAAGAGGCTTTAAA<br/> ACCTTATCGTGAACATCTGAAGTTGAAATTGCTGTTTGAAGAGTTGAATAA<br/> TCTGCCTCTTAAAACCGAGTATGAACAGAAGTTTTTATAGATCTGTATGAACT<br/> TTTTCAAAAGAATGCACTAGATCAGATGGAACTAAATTTTTAAAACCTTG<br/> GCGACACGGTATCTGAATTTTAAAGCGCAAAGCTTGAATACAGTGATTTA<br/> GAATTGATTTGAGTCAGCTACAGAAGAAGGATGCTGGGAAAAACGCAA<br/> AGCTGAAAATCAACGTAAATTTGAATTAGGTGGTGCTGTTCTTGTGCGCATT<br/> TAAGAACTCAATATTGATATTAGCAATGATACTCCTCAACAGATTACCAAT<br/> CGGATTGTGAATACGACAAAGTTTTATAATGAAGTACGTAAATCTTTAATTT<br/> TTAAAGATGTTAAGACATATGAAAATGAATTTTTAAAGCAAATAAACTTTTT<br/> ATTCAGGTGTTAGAAGGATTACATACCTGGCAAAGGGCGGAGAATTATT<br/> GTCAGTAATTGAAATTTAAAAGGCCTTAGAAAAAGGCGAAGAGTAG<br/> ATGGACAAAAAGATAGAAGAGAAAATAAAGATATTAATGAAAAAATTCAA<br/> AAATTGGATTTAGCTATTCAAGAACTAATAGAACTACAGACAATTTTTTTA<br/> TTAATGATAAGTACTATGGAATTGAATGTGCTTTTTATTTTAGACCATGCACT<br/> AAATATTTAAAATGCACTTTTTCAACAAGTATCCAGCATTTGCACCACCTCAC<br/> TTACGAGGAGTAGAAAATTATGATCGAATTATACATATTAGAGAAAATAATC<br/> CTGAAGATAAGCTAGAACAATTTCTCCTCTTAAAGACTAA</p> <p><b>ATGACCCCAAATGAAAATGGACTCTCGGATCACCTCAGTGAAACAGAGCA<br/> GATGAATGCGAAGATGAAAGATAGAACCAGCGACCAAATGGTGCTCTAG<br/> AAAGCCAACAAGCAAATGGACAATGTGCCAAGAGTCTGAACCAGCAGGT<br/> AAGACTGACTGA</b></p> |
| <i>group_1313</i> | hypothetical protein | A1         | / | hypothetical protein | <p>AAGACTCAAGACGTAACAGTACCCCATGTTTTGAGTTTCGAGGTGCATTCA<br/> CTTCCTGAATACGTATTACCGATACAAAATACGCCTCCCAAACGCACTCAA<br/> TCAGAACCAGTACAACCTAAAGCTGATGATTATGATTACGGTGGCCCTGG<br/> TTTTTAA</p> <p>ATGCCTGTATGGCTGAAAAATCCGGTTGAAGGGGGTCAAGGGGGAAGCG<br/> CCCCATTGCGTACTAGTTTTCTCCGATGAGGAGAACTGTCAAGTGCGAAT<br/> TATTTAATATAA</p> <p>ATGGAAATGGAAAAAGCAAAAAGCGTGGTCGACCTGCTCAGTTGTTACA<br/> GATTGCTGAGTTACATGCATTTGTAGAGTTTTTAGAACAGCAAGAACAGCT<br/> TTCTGATCTTCAATCTCAAGTGTTAAAGGCTTTAAATAGTGTTGATTGTAAT<br/> TTTGAGGGGCTAACTCAGACAGATCAGGTTCTGGTCAAAGAGGCTTTAAA<br/> ACCTTATCGTGAACATCTGAAGTTGAAATTGCTGTTTGAAGAGTTGAATAA<br/> TCTGCCTCTTAAAACCGAGTATGAACAGAAGTTTTTATAGATCTGTATGAACT<br/> TTTTCAAAAGAATGCACTAGATCAGATGGAACTAAATTTTTAAAACCTTG<br/> GCGACACGGTATCTGAATTTTAAAGCGCAAAGCTTGAATACAGTGATTTA<br/> GAATTGATTTGAGTCAGCTACAGAAGAAGGATGCTGGGAAAAACGCAA<br/> AGCTGAAAATCAACGTAAATTTGAATTAGGTGGTGCTGTTCTTGTGCGCATT<br/> TAAGAACTCAATATTGATATTAGCAATGATACTCCTCAACAGATTACCAAT<br/> CGGATTGTGAATACGACAAAGTTTTATAATGAAGTACGTAAATCTTTAATTT<br/> TTAAAGATGTTAAGACATATGAAAATGAATTTTTAAAGCAAATAAACTTTTT<br/> ATTCAGGTGTTAGAAGGATTACATACCTGGCAAAGGGCGGAGAATTATT<br/> GTCAGTAATTGAAATTTAAAAGGCCTTAGAAAAAGGCGAAGAGTAG<br/> ATGGACAAAAAGATAGAAGAGAAAATAAAGATATTAATGAAAAAATTCAA<br/> AAATTGGATTTAGCTATTCAAGAACTAATAGAACTACAGACAATTTTTTTA<br/> TTAATGATAAGTACTATGGAATTGAATGTGCTTTTTATTTTAGACCATGCACT<br/> AAATATTTAAAATGCACTTTTTCAACAAGTATCCAGCATTTGCACCACCTCAC<br/> TTACGAGGAGTAGAAAATTATGATCGAATTATACATATTAGAGAAAATAATC<br/> CTGAAGATAAGCTAGAACAATTTCTCCTCTTAAAGACTAA</p> <p><b>ATGACCCCAAATGAAAATGGACTCTCGGATCACCTCAGTGAAACAGAGCA<br/> GATGAATGCGAAGATGAAAGATAGAACCAGCGACCAAATGGTGCTCTAG<br/> AAAGCCAACAAGCAAATGGACAATGTGCCAAGAGTCTGAACCAGCAGGT<br/> AAGACTGACTGA</b></p> |
| <i>group_1314</i> | hypothetical protein | A1         | / | hypothetical protein | <p>AAGACTCAAGACGTAACAGTACCCCATGTTTTGAGTTTCGAGGTGCATTCA<br/> CTTCCTGAATACGTATTACCGATACAAAATACGCCTCCCAAACGCACTCAA<br/> TCAGAACCAGTACAACCTAAAGCTGATGATTATGATTACGGTGGCCCTGG<br/> TTTTTAA</p> <p>ATGCCTGTATGGCTGAAAAATCCGGTTGAAGGGGGTCAAGGGGGAAGCG<br/> CCCCATTGCGTACTAGTTTTCTCCGATGAGGAGAACTGTCAAGTGCGAAT<br/> TATTTAATATAA</p> <p>ATGGAAATGGAAAAAGCAAAAAGCGTGGTCGACCTGCTCAGTTGTTACA<br/> GATTGCTGAGTTACATGCATTTGTAGAGTTTTTAGAACAGCAAGAACAGCT<br/> TTCTGATCTTCAATCTCAAGTGTTAAAGGCTTTAAATAGTGTTGATTGTAAT<br/> TTTGAGGGGCTAACTCAGACAGATCAGGTTCTGGTCAAAGAGGCTTTAAA<br/> ACCTTATCGTGAACATCTGAAGTTGAAATTGCTGTTTGAAGAGTTGAATAA<br/> TCTGCCTCTTAAAACCGAGTATGAACAGAAGTTTTTATAGATCTGTATGAACT<br/> TTTTCAAAAGAATGCACTAGATCAGATGGAACTAAATTTTTAAAACCTTG<br/> GCGACACGGTATCTGAATTTTAAAGCGCAAAGCTTGAATACAGTGATTTA<br/> GAATTGATTTGAGTCAGCTACAGAAGAAGGATGCTGGGAAAAACGCAA<br/> AGCTGAAAATCAACGTAAATTTGAATTAGGTGGTGCTGTTCTTGTGCGCATT<br/> TAAGAACTCAATATTGATATTAGCAATGATACTCCTCAACAGATTACCAAT<br/> CGGATTGTGAATACGACAAAGTTTTATAATGAAGTACGTAAATCTTTAATTT<br/> TTAAAGATGTTAAGACATATGAAAATGAATTTTTAAAGCAAATAAACTTTTT<br/> ATTCAGGTGTTAGAAGGATTACATACCTGGCAAAGGGCGGAGAATTATT<br/> GTCAGTAATTGAAATTTAAAAGGCCTTAGAAAAAGGCGAAGAGTAG<br/> ATGGACAAAAAGATAGAAGAGAAAATAAAGATATTAATGAAAAAATTCAA<br/> AAATTGGATTTAGCTATTCAAGAACTAATAGAACTACAGACAATTTTTTTA<br/> TTAATGATAAGTACTATGGAATTGAATGTGCTTTTTATTTTAGACCATGCACT<br/> AAATATTTAAAATGCACTTTTTCAACAAGTATCCAGCATTTGCACCACCTCAC<br/> TTACGAGGAGTAGAAAATTATGATCGAATTATACATATTAGAGAAAATAATC<br/> CTGAAGATAAGCTAGAACAATTTCTCCTCTTAAAGACTAA</p> <p><b>ATGACCCCAAATGAAAATGGACTCTCGGATCACCTCAGTGAAACAGAGCA<br/> GATGAATGCGAAGATGAAAGATAGAACCAGCGACCAAATGGTGCTCTAG<br/> AAAGCCAACAAGCAAATGGACAATGTGCCAAGAGTCTGAACCAGCAGGT<br/> AAGACTGACTGA</b></p> |
| <i>group_1315</i> | hypothetical protein | A1, A2, A3 | O | Nuclear body protein | <p>AAGACTCAAGACGTAACAGTACCCCATGTTTTGAGTTTCGAGGTGCATTCA<br/> CTTCCTGAATACGTATTACCGATACAAAATACGCCTCCCAAACGCACTCAA<br/> TCAGAACCAGTACAACCTAAAGCTGATGATTATGATTACGGTGGCCCTGG<br/> TTTTTAA</p> <p>ATGCCTGTATGGCTGAAAAATCCGGTTGAAGGGGGTCAAGGGGGAAGCG<br/> CCCCATTGCGTACTAGTTTTCTCCGATGAGGAGAACTGTCAAGTGCGAAT<br/> TATTTAATATAA</p> <p>ATGGAAATGGAAAAAGCAAAAAGCGTGGTCGACCTGCTCAGTTGTTACA<br/> GATTGCTGAGTTACATGCATTTGTAGAGTTTTTAGAACAGCAAGAACAGCT<br/> TTCTGATCTTCAATCTCAAGTGTTAAAGGCTTTAAATAGTGTTGATTGTAAT<br/> TTTGAGGGGCTAACTCAGACAGATCAGGTTCTGGTCAAAGAGGCTTTAAA<br/> ACCTTATCGTGAACATCTGAAGTTGAAATTGCTGTTTGAAGAGTTGAATAA<br/> TCTGCCTCTTAAAACCGAGTATGAACAGAAGTTTTTATAGATCTGTATGAACT<br/> TTTTCAAAAGAATGCACTAGATCAGATGGAACTAAATTTTTAAAACCTTG<br/> GCGACACGGTATCTGAATTTTAAAGCGCAAAGCTTGAATACAGTGATTTA<br/> GAATTGATTTGAGTCAGCTACAGAAGAAGGATGCTGGGAAAAACGCAA<br/> AGCTGAAAATCAACGTAAATTTGAATTAGGTGGTGCTGTTCTTGTGCGCATT<br/> TAAGAACTCAATATTGATATTAGCAATGATACTCCTCAACAGATTACCAAT<br/> CGGATTGTGAATACGACAAAGTTTTATAATGAAGTACGTAAATCTTTAATTT<br/> TTAAAGATGTTAAGACATATGAAAATGAATTTTTAAAGCAAATAAACTTTTT<br/> ATTCAGGTGTTAGAAGGATTACATACCTGGCAAAGGGCGGAGAATTATT<br/> GTCAGTAATTGAAATTTAAAAGGCCTTAGAAAAAGGCGAAGAGTAG<br/> ATGGACAAAAAGATAGAAGAGAAAATAAAGATATTAATGAAAAAATTCAA<br/> AAATTGGATTTAGCTATTCAAGAACTAATAGAACTACAGACAATTTTTTTA<br/> TTAATGATAAGTACTATGGAATTGAATGTGCTTTTTATTTTAGACCATGCACT<br/> AAATATTTAAAATGCACTTTTTCAACAAGTATCCAGCATTTGCACCACCTCAC<br/> TTACGAGGAGTAGAAAATTATGATCGAATTATACATATTAGAGAAAATAATC<br/> CTGAAGATAAGCTAGAACAATTTCTCCTCTTAAAGACTAA</p> <p><b>ATGACCCCAAATGAAAATGGACTCTCGGATCACCTCAGTGAAACAGAGCA<br/> GATGAATGCGAAGATGAAAGATAGAACCAGCGACCAAATGGTGCTCTAG<br/> AAAGCCAACAAGCAAATGGACAATGTGCCAAGAGTCTGAACCAGCAGGT<br/> AAGACTGACTGA</b></p> |



|                   |                      |             |   |                                                 |                                                                                                                                                                                                                                                                                                                                                                                                                                                                                                                                                                                                                                                            |
|-------------------|----------------------|-------------|---|-------------------------------------------------|------------------------------------------------------------------------------------------------------------------------------------------------------------------------------------------------------------------------------------------------------------------------------------------------------------------------------------------------------------------------------------------------------------------------------------------------------------------------------------------------------------------------------------------------------------------------------------------------------------------------------------------------------------|
| <i>group_1317</i> | hypothetical protein | A1, A3, A14 | S | Plasmid replication protein                     | ATGGCAAATAAAGCATCACAAAGGTAATGTAAGAACTAGAAATTGGACGTTT<br>GTAATTTATCCAGAAAGTGTCTGAAGGTTGGAGAGATATATTAGATAAT<br>GAACATATACAATGGGTTGAATCTCCATTACATGATAAGGATACTAATCCA<br>AATGGAGAGATAAAAAAGGCTCATAAGCATATATTGGTTATGTATGATGGG<br>GTTAAAAGTTATAATCAGATATTGGAATTGACCGAAAGAATAAATGCGACT<br>GTTCCACAAAGGTGTGGTTCTGCTAAAGGTCTTGTTAGATATATGTTGCAT<br>ATGGATAATCCTGAGAAATATCAGTATGATCGTGAAGATATGATTGCTCAT<br>GGTGGAGCAGATATTCTAGAGATGTTAAAACCGACGTCTGCAAGCAGATA<br>TGAGATGTTTAAAGAAATGACTTCTTTTATAGTTGAAAATGACATAAGAGAA<br>TACGAAGAACTATGGATTTATGCTATGGAGCATAGATTTGATGATTGGTTC<br>CCTTTGTTAGCTGATAATGGTACTTTTGCTATAAATACGTTTATAAAATCTA<br>GAAGACATAGAATAAAAGATAACAAATGA |
| <i>group_1318</i> | hypothetical protein | A1, A3, A14 | / | hypothetical protein                            | ATGAGTAAAAGATTGCAAGTGACTTTGAAAGATGAGATGTCGGAAAAGTTA<br>GATGAATTGGCGAAATATTTAGGAGTTTCAAAAAGTGCGGTAATTGCGTTG<br>GCTTTGCAAGATTTTGATAAAAAGCATAAAAATAGATAA                                                                                                                                                                                                                                                                                                                                                                                                                                                                                                      |
| <i>group_1319</i> | hypothetical protein | A1, A3, A14 | L | Replication protein                             | ATGTTGAGTTATGGTGGTTTGCTTAAACAAAAACATAAAAATTTTAAATTTAG<br>ACGATGCCGAAGAAGGTAATTTAATTCAAACGAACGATGAAGAAAAAACG<br>ACCGAAGAAGAACAAAAAGCCCATTCAATTACGGCTATTTGGAATTTTGAA<br>AAACAAAATTATTTCTTAAAGAATTTGTAA                                                                                                                                                                                                                                                                                                                                                                                                                                                       |
| <i>group_1320</i> | hypothetical protein | A1, A3, A14 | L | COG2801 Transposase and inactivated derivatives | ATGGCTGAAATACGTGTGTTTTATAGAGATGAATTTCTTTGTA CTGCTATAT<br>GTCCAGAAATAGCTGATTACTCCATAGATATAAAAGACATACAGCACGCTC<br>GTAGTCAGAGAAGAAAACACTTAAAACAAAATATTGCTAGTCCAAGTACCA<br>CGGAATTAATTAAGGAAGAAAAAATTGTGGTTATTCACCTCAAGAAACGA<br>CTAAAAACGTCAAAAAATTAAGAGTTATCGTAATGACTAA                                                                                                                                                                                                                                                                                                                                                                                      |
| <i>group_1322</i> | hypothetical protein | A1, A3, A14 | / | hypothetical protein                            | ATGTACAAAGAAAAATTGAAAACAGATGGTGCATTAGTAATATTTGTGTGG<br>ATTATTTTCTTTATATTTAACATTTTGTATGATGATACAATGCTAAATACTATGCA<br>TAATCTTCCAGATAAAATTTAAATATGAGGGCAAACCTTCAAATATGTTACCA<br>ACATTTTCATGATTTATTTTATGGATTTATAACTTTTGATATTTTAACTTTTTTA<br>TTGCTAATATTTATCACTATAGATTGGTATCTCAGAAAGAAGAAGTAA                                                                                                                                                                                                                                                                                                                                                                    |
| <i>group_1324</i> | hypothetical protein | A1, A3, A14 | / | hypothetical protein                            | ATGAACGATAACAAAATGACGCCAGGGGAACTGCGCGGACCTGGGGGT<br>TTGGGGACAGTATTCTCCCTGCGCATGCTTGGCATGTTTATGGTCCTGCC<br>GGTTCTGACCACGTATGGCATGGCGTTGCAGGGTGCAAGTGA                                                                                                                                                                                                                                                                                                                                                                                                                                                                                                       |

|                   |                      |             |     |                               |                                                                                                                                                                                                                                                                                                                                                                                                                                                                                                                                                                                                                                                                                                                                                                                                                                                                                                                                                                                                                                                                                                                                                                                                                                                                                                                                                                                                                                                                                                                                                                                                                                                                                                                                                                                                       |
|-------------------|----------------------|-------------|-----|-------------------------------|-------------------------------------------------------------------------------------------------------------------------------------------------------------------------------------------------------------------------------------------------------------------------------------------------------------------------------------------------------------------------------------------------------------------------------------------------------------------------------------------------------------------------------------------------------------------------------------------------------------------------------------------------------------------------------------------------------------------------------------------------------------------------------------------------------------------------------------------------------------------------------------------------------------------------------------------------------------------------------------------------------------------------------------------------------------------------------------------------------------------------------------------------------------------------------------------------------------------------------------------------------------------------------------------------------------------------------------------------------------------------------------------------------------------------------------------------------------------------------------------------------------------------------------------------------------------------------------------------------------------------------------------------------------------------------------------------------------------------------------------------------------------------------------------------------|
| <i>group_1325</i> | hypothetical protein | A1, A3, A14 | /   | hypothetical protein          | ATGAATACCCTGTTTGCCCTTGTTCATCAGCGTGTGTGCTCTCACTGGTGAA<br>TGCTCTGATGTTCTGATCGGTGTTTATCCATCAGAGGCCAGTTGCAACAG<br>CAACGCCGATGAACAAAAAGTACAGGGCCAGTGTCTCCCCTACCGAAATG<br>CACAAAAATGGCTGACGACCAACGGCCTGCAGTGAGTTTTTGA<br>ATGCAAATGCTGGTACATTATGATGTTCTGTTATCCAAAATCGTTTATAGCC<br>GAGTTTGTCTAGCTAATTGTGCTAAATGAACAGTATCTTGTAAGCTTCTTC<br>GGCAGATTTGCCTTCATCAATCACAGCGTAATCTAACACATTAA<br>ATGATGAAGCGCAATATTCTGGCAGTGGTGATCCCTGCCCTGCTGGTAGC<br>CGGTGCAGCCAACGCTGCAGAAATCTATAACAAAACGGCAACAAACTGGA<br>CTTCTATGGAAAAATGGTTCGGCGAGCACGTCTGGACCACCAATGGCGACA<br>CCAGCAGCGACGATACCACCTATGCCCGTATCGGCCTGA<br>ATGCGCTTCCAGTTGCTGAATGGTTTTGCTGAGGGTGGCGTTGGGCATAT<br>TCAGCGAGTCCGCGGCGCGGGTAAAGCTGCCGGCTTCGACAACGCGAGT<br>GAAGGCTTTGAGAGCTGA<br>ATGAACAATTCAAGTTCAAACGGTCAAGAGCTGTTTTTCAATTAGATGCG<br>GCAAGTGCTTTGACACTTAATACCATCACGCTCATGACATTCATGGCTGCA<br>TCTAGTGCGCCGACACCACTCTACCGTCTATACCAACAGCTTTGGCAATTT<br>TCACCGTTACATTGACTTTGATTTTTGCCACCTATGCTTTTACGCTGCTT<br>GGCTCATTACTCATTATTGGTTCTTTGTCTGATTATATTGGACGCCGCCA<br>GTCATTATTGCAGCTATTTCTTTGCAAATTATTTCAATGAGCTTTTTCTTATT<br>TGCTTCAGATGTTTCGATGTTATTCATTGCACGAGGCTTACAAGGAATCGC<br>AACAGGGCTTGCTGTTTCAGCTATAGGCGCAGCAATTTTAGATTTAGTAA<br>GCTTCATGGTTCACTAATTAATAGTATTGCACCAATGATAGGTATGGCTGT<br>TGGGATTTTTCTGACTTGTTCTATTTTGAATTCTCTGCCACCCCTTACAG<br>CTTGTTTTTGAGTTCTTATGTTTTCTTCTTATTTGTGAATCATTTTAAGTTT<br>TCTTACTCCAGAGACCGCACAAAGAAGATCCGGTGCACCTGCTTCATTA<br>ACCCAATATGGCCATTCCGCCACAGACAAAAGCGCTTTATTGAGTATTAG<br>CCCGATTAACATTGCACTTTGGATGGTCAGTGGTTTCTCCTATCGCTTAT<br>GCCATCTTACTGGCAAAAATTTCCACACGTATCGGCATGGCTAAACG<br>GGATTATGTTTATGGCGCTCGCCCTTTCCGGTGCGGTAGGTATATTAACG<br>CTTAGGAAGTCGACAAATTTCCGTATTTTATTAACCGGTACGCTCTCGATT<br>GCTATTGGTGCCATTGTCTTATTCATCGCCATTAATCTAACCAATGCTGTA<br>GTTCTATTTTTAGGTTCTATTACTGGAGTTGGTTTTGGTACAGCATTTA |
| <i>group_1326</i> | hypothetical protein | A1, A3, A14 | /   | hypothetical protein          |                                                                                                                                                                                                                                                                                                                                                                                                                                                                                                                                                                                                                                                                                                                                                                                                                                                                                                                                                                                                                                                                                                                                                                                                                                                                                                                                                                                                                                                                                                                                                                                                                                                                                                                                                                                                       |
| <i>group_1329</i> | hypothetical protein | A1, A2, A14 | /   | hypothetical protein          |                                                                                                                                                                                                                                                                                                                                                                                                                                                                                                                                                                                                                                                                                                                                                                                                                                                                                                                                                                                                                                                                                                                                                                                                                                                                                                                                                                                                                                                                                                                                                                                                                                                                                                                                                                                                       |
| <i>group_1330</i> | hypothetical protein | A1, A2, A14 | /   | hypothetical protein          |                                                                                                                                                                                                                                                                                                                                                                                                                                                                                                                                                                                                                                                                                                                                                                                                                                                                                                                                                                                                                                                                                                                                                                                                                                                                                                                                                                                                                                                                                                                                                                                                                                                                                                                                                                                                       |
| <i>group_14</i>   | hypothetical protein | C4, C6      | EGP | Sugar (and other) transporter |                                                                                                                                                                                                                                                                                                                                                                                                                                                                                                                                                                                                                                                                                                                                                                                                                                                                                                                                                                                                                                                                                                                                                                                                                                                                                                                                                                                                                                                                                                                                                                                                                                                                                                                                                                                                       |

|                   |                             |             |   |                                                                  |                                                                                                                                                                                                                                                                                                                                                                                                                                                                                                                                                                                                                                                                                                                                                                                                                                                                                                                                                                                                                                                                                   |
|-------------------|-----------------------------|-------------|---|------------------------------------------------------------------|-----------------------------------------------------------------------------------------------------------------------------------------------------------------------------------------------------------------------------------------------------------------------------------------------------------------------------------------------------------------------------------------------------------------------------------------------------------------------------------------------------------------------------------------------------------------------------------------------------------------------------------------------------------------------------------------------------------------------------------------------------------------------------------------------------------------------------------------------------------------------------------------------------------------------------------------------------------------------------------------------------------------------------------------------------------------------------------|
| <i>group_1495</i> | hypothetical protein        | L6          | G | Phosphoglucomutase/phosphomannomutase, alpha/beta/alpha domain I | <p>TGGGGGCTATTCGTAGTGTAAATGCCATTGGCACTTCCCGAAGAACGTGCG<br/>GGTCTTATGGCTGCTTTTTTTGTTGAAAGTTATTTGGCTTTTAGTATTCTG<br/>CAATTTTAGCTGGCTATTTTGTAGGTAATAATTGGGCTGATGAGTACGGCAA<br/>ATAGTTATATTAGTTTTATTATCTTATTGTCACTGGTCGCCCTTCTAATGATT<br/>ATAAAAATTTTAAAAATAAATAA</p> <p>ATGGTGCGCAAATATTTTCGGCACAGACGGTATTCGTGGCAAAGCCAACGA<br/>AGGCGCGATGACGGCGGAAACCGCCTTGCGCGTCGGCATGGCGGCTGG<br/>CCGTGTCTTTTCGTCGCGGTGACCACCGCCATCGTGTCTGTGATCGGCAAG<br/>GATACGCGCTGTCTGGGCTATATGCTTGAACCCGCGCTCACAGCCGGTTT<br/>CACCTCGATGGGCATGGACGTATTCCTTTTTGGCCCGCTGCCGACAACGT<br/>ATAGGAAGAATAAACGCCCTTTTACCCAAGTCCAACAGCTTTGGACCGC<br/>AGTTGA</p>                                                                                                                                                                                                                                                                                                                                                                                                                                                          |
| <i>group_15</i>   | hypothetical protein        | A2, A3, A14 | L | Transposase and inactivated derivatives                          | <p>ATGAACCCATTCAAAGGCCGGCATTTCAGCGTGACATCATTCTGTGGGC<br/>CGTACGCTGGTACTGCAAATACGGCACTGTTGCAAAGTTAGCGATGAGGC<br/>AGCCTTTTGTCTTATTCAAAGGCCTTACATTTCAAAACTCTGCTTACCAG<br/>GCGCATTTTCGCCAGGGGATCACCATAATAAAATGCTGAGGCCTGGCCTT<br/>TGCGTAGTGCACGCATCACCTCAATACCTTTGA</p> <p>ATGAACCCATTCAAAGGCCGGCATTTCAGCGTGACATCATTCTGTGGGC<br/>CGTACGCTGGTACTGCAAATACGGCATCAGTTACCGTGAGCTGCAGGAGA<br/>TGCTGGCTGAACGCGGAGTGAATGTCGATCACTCCACGATTTACCGCTGG<br/>GTTTCAGCGTTATGCGCCTGAAATGGAAAAACGGCTGCGCTGGTACTGGC<br/>GTAACCCTTCCGATCTTTGCCCGTGGCACATGGATGAAACCTACGTGAAG<br/>GTCAATGGCCGCTGGGCGTATCTGTACCGGGCCGTCGACAGCCGGGGC<br/>CGCACTGTGATTTTTATCTCTCCTCCCGTCGTAACAGCAAAGCTGCATAC<br/>CGGTTTCTGGGTAAAATCCTCAACAACGTGAAGAAGTGGCAGATCCCGCG<br/>ATTCATCAACACGGATAAAGCGCCCGCCTATGGTCGCGCGCTTGCTCTGC<br/>TCAAACGCGAAGGCCGGTGCCCGTCTGACGTTGAACACCGACAGATTAA<br/>GTACCGGAACAACGTGATTGAATGCGATCATGGCAAACCTGAAACGGATAA<br/>TCAAACGCCACGCTGGGATTTAAATCCATGAAGACGGCTTACGCCACCATC<br/>AAAGTATTGAGGTGATGCGTGCCTACGCAAAGGCCAGGCCTCAGCATT<br/>TTATTATGGTGATCCCCTGGGCGAAATGCGCCTGGTAAGCAGAGTTTTTG<br/>AAATGTAA</p> |
| <i>group_16</i>   | IS6 family transposase IS15 | A2, A3, A14 | L | Transposase and inactivated derivatives                          |                                                                                                                                                                                                                                                                                                                                                                                                                                                                                                                                                                                                                                                                                                                                                                                                                                                                                                                                                                                                                                                                                   |

|                  |               |                             |             |   |                                         |                                                                                                                                                                                                                                                                                                                                                                                                                                                                                                                                                                                                                                                                                                                                                                                                                                                                                                                                                                                                                                                                                                                                                                                                                                                                                                                                                                                                                                                                                                                                                                                                                                                                                        |
|------------------|---------------|-----------------------------|-------------|---|-----------------------------------------|----------------------------------------------------------------------------------------------------------------------------------------------------------------------------------------------------------------------------------------------------------------------------------------------------------------------------------------------------------------------------------------------------------------------------------------------------------------------------------------------------------------------------------------------------------------------------------------------------------------------------------------------------------------------------------------------------------------------------------------------------------------------------------------------------------------------------------------------------------------------------------------------------------------------------------------------------------------------------------------------------------------------------------------------------------------------------------------------------------------------------------------------------------------------------------------------------------------------------------------------------------------------------------------------------------------------------------------------------------------------------------------------------------------------------------------------------------------------------------------------------------------------------------------------------------------------------------------------------------------------------------------------------------------------------------------|
| <i>group_17</i>  |               | IS6 family transposase IS15 | A2, A3, A14 | L | Transposase and inactivated derivatives | <p>ATGAACCCATTCAAAGGCCGGCATTTCAGCGTGACATCATTCTGTGGGC<br/> CGTACGCTGGTACTGCAAATACGGCATCAGTTACCGTGAGCTGCAGGAGA<br/> TGCTGGCTGAACGCGGAGTGAATGTGATCACTCCACGATTTACCGCTGG<br/> GTTACGCGTTATGCGCCTGAAATGGAAAAACGGCTGCGCTGGTACTGGC<br/> GTAACCCTTCCGATCTTTGCCCGTGGCACATGGATGAAACCTACGTGAAG<br/> GTCAATGGCCGCTGGGCGTATCTGTACCGGGCCGTCGACAGCCGGGGC<br/> CGCACTGTGATTTTTATCTCTCCTCCCGTCGTAACAGCAAAGCTGCATAC<br/> CGGTTTCTGGGTAAAATCCTCAACAACGTGAAGAAGTGGCAGATCCCACG<br/> ATTCATCAACACGGATAAAGCGCCCGCCTATGGTCGCGCGCTTGCTCTGC<br/> TCAAACGCGAAGGCCGGTGCCCGTCTGACGTTGAACACCGACAGATTAA<br/> GTACCGGAACAACGTGATTGAATGCGATCATGGCAAACCTGAAACGGATAA<br/> TCAACGCCACGCTGGGATTTAAATCCATGAAGACGGCTTACGCCACCATC<br/> AAAGGTATTGAGGTGATGCGTGCACTACGCAAAGGCCAGGCCTCAGCATT<br/> TTATTATGGTGATCCCCTGGGCGAAATGCGCCTGGTAAGCAGAGTTTTTG<br/> AAATGTAA</p> <p>TTGATCAGTTTAGGTAAGACGTTGTTTTTCATTGCACACGCTTCAGAAGAT<br/> CAAAACGGTGATCAAATTATTTACCGACCAGATCTAGGTGGTAAAAACCGT<br/> AACGAGCTTTACCGTATCGCAGATGTGATGGGTTATCTAACAACCTGTTACT<br/> ACAGGTGAAGGTAAAAATGCCCGCGTTATTAATTTAAACCCTCGCCTACA<br/> CATCATGCGAAAAACTCAGGTGCTTTAGGTGGTGAACCTGGTGAAGTATG<br/> GGTACCAGATCTTAAAGCACATCCTACTTTCTTGGCTGACCTGATTACTCA<br/> AGCTAAAGATCACATTAACACCTTAACGCCTGCACAACCTTGACAGCAGCTAA<br/> AGCCCAAGAAGAGCTAGAAAACCTGGAACAAAGCTGTGAAGAAGCTGAGC<br/> ATGCAGGTGACCTTAATCAATTAACCTGAGTCGCTTGATAAAGAACACATGT<br/> ATTACCAGAACATGCGCCAAGCAATGTTAATGAGAGCTAAAGCATTGAATT<br/> GCACGTTTGATAAACAACGTGGCACTTGGATTAGTCCACCAGAATTTAACG<br/> GTATCTCAGATCAACAAAGAGATGAACTTCAAACTTTATTGCTGAACGTG<br/> GCCTCGATGTAAAAACAGTTTGTGAGCACTTCGGCATAGATGCCCTGATC<br/> CAAATTGAAGCGGCAAACTAACTGCAGTTAAACAAGAAATTGAAACCTTA<br/> GCGAAAACGGGGATGACAGCATGA</p> |
| <i>group_175</i> |               | hypothetical protein        | L9, L10     | S | AAA domain                              | <p>ATGAAAACCGCCACTGCGCCGTTACCACCGCTGCGTTCGGTCAAGGTTCT<br/> GGACCAGTTGCGTGAGCGCATACGCTACTTGCATTACAGCTTACCAACCG<br/> AACAGGCTTATGTCAACTGGGTTTCGTGCCTTCATCCGTTTCCACGGTGTG</p>                                                                                                                                                                                                                                                                                                                                                                                                                                                                                                                                                                                                                                                                                                                                                                                                                                                                                                                                                                                                                                                                                                                                                                                                                                                                                                                                                                                                                                                                                                             |
| <i>group_19</i>  | <i>xerC_1</i> | Tyrosine recom              | A2, A3, A14 | L | Phage integrase family                  | <p>ATGAAAACCGCCACTGCGCCGTTACCACCGCTGCGTTCGGTCAAGGTTCT<br/> GGACCAGTTGCGTGAGCGCATACGCTACTTGCATTACAGCTTACCAACCG<br/> AACAGGCTTATGTCAACTGGGTTTCGTGCCTTCATCCGTTTCCACGGTGTG</p>                                                                                                                                                                                                                                                                                                                                                                                                                                                                                                                                                                                                                                                                                                                                                                                                                                                                                                                                                                                                                                                                                                                                                                                                                                                                                                                                                                                                                                                                                                             |

binase  
XerC

CGTCACCCGGCAACCTTGGGCAGCAGCGAAGTCGAGGCATTTCTGTCCT  
GGCTGGCGAACGAGCGCAAGGTTTCGGTCTCCACGCATCGTCAGGCATT  
GGCGGCCTTGCTGTTCTTCTACGGCAAGGTGCTGTGCACGGATCTGCC  
TGGCTTCAGGAGATCGGAAGACCTCGGCCGTCGCGGCCGCTTGCCGGTG  
GTGCTGACCCCGGATGAAGTGGTTCGCATCCTCGGTTTTCTGGAAGGCG  
AGCATCGTTTTGTTTCGCCCAGCTTCTGTATGGAACGGGCATGCGGATCAGT  
GAGGGTTTGCAACTGCGGGTCAAGGATCTGGATTTTCGATCACGGCACGAT  
CATCGTGCGGGAGGGCAAGGGCTCCAAGGATCGGGCCTTGATGTTACCC  
GAGAGCTTGGCACCCAGCCTGCGCGAGCAGCTGTGCGGTGCACGGGCA  
TGGTGGCTGAAGGACCAGGCCGAGGGCCGAGCGGCGTTCGCTTCCC  
GACGCCCTTGAGCGGAAGTATCCGCGCGCCGGGCATTCTGGCCGTGGT  
TCTGGGTTTTTTCGCGCAGCACACGCATTTCGACCGATCCACGGAGCGGTGT  
CGTGCGTCGCCATCACATGTATGACCAGACCTTTCAGCGCGCCTTCAAAC  
GTGCCGTAGAAGGCACTGTTGCAAAGTTAGCGATGAGGCAGCCTTTTGT  
TTATTCAAAGGCCTTACATTTCAAAACTCTGCTTACCAGGCGCATTTCGC  
CCAGGGGATCACCATAATAAAATGCTGAGGCCTGGCCTTTGCGTAGTGCA  
CGCATCACCTCAATACCTTTGA  
ATGAAAAAATTGAGTGACGAATACTTACCTGTTAGAAAAGCTCAAACCTGTT  
TATGGGAGTATTTTCGGGAAATTATGCCTTTAGAGGTGAGAAAACCATTTGG  
TTTGAATCGACCCTTGAGCGTGATTTCACTTAAGCAAGAATTTAATAACA  
ATGTGATTGATGTTATCGGTCAACCTGTAGTTATCCCCTACATCACTGAAT  
TGGTAACCAATCAACCTTACTCCTGACTTTTTAGTGAGTTTTCAAGCT  
CGAATTGTGATGATTTTGGAGATTTTCCTGTACCAATGCTCATCGAAATTA  
AGCCTAAGAAAAAGCTTGTGAGGACTGGGATAAGTTAAAACCAAATTC  
GAGCAGCCATCGTTTTGCTGCTGATAAAGGATGGAAGTTCAAATTTATCA  
GTGAAACAAGATTATATGATCAGTATTGGGAAAATATTAATTTCTTAAAAA  
ATTTAGACGCTCTCATGTAGGTGCCGTTGATCAACAACTATTACTCGATAC  
CCTACAAGAGTTAGGTCAATCAACAATTAATCAATTACCTGCCCATATTTTT  
AAAGATAAAACCAATGTTTTAAAAGGAATTCACCAAGTTTGGGCATTAGTG  
GCAAAGCGCATGATTGCTTGTGACTTGTATTGCCCTTTAACGGCTGAAACA  
GTGATATGGGTGAACCAAATGATGCATTTGCGAGGAATATCTAA

group\_  
192

hypoth  
etical  
protein

L7, L8,  
L9

L

TnsA endonuclease N terminal

|                   |                      |        |   |                                             |                                                                                                                                                                                                                                                                                                                                                                                                                                                                                                                                                                                                                                                                                                                                                                                                                                                                                                                                                                                                                                                                                                                                                                                                                                                                                                                                                                                                                                                                                                                                                                                                                                                                                                                            |
|-------------------|----------------------|--------|---|---------------------------------------------|----------------------------------------------------------------------------------------------------------------------------------------------------------------------------------------------------------------------------------------------------------------------------------------------------------------------------------------------------------------------------------------------------------------------------------------------------------------------------------------------------------------------------------------------------------------------------------------------------------------------------------------------------------------------------------------------------------------------------------------------------------------------------------------------------------------------------------------------------------------------------------------------------------------------------------------------------------------------------------------------------------------------------------------------------------------------------------------------------------------------------------------------------------------------------------------------------------------------------------------------------------------------------------------------------------------------------------------------------------------------------------------------------------------------------------------------------------------------------------------------------------------------------------------------------------------------------------------------------------------------------------------------------------------------------------------------------------------------------|
| <i>group_193</i>  | hypothetical protein | L7, L9 | L | TnsA endonuclease N terminal                | <p>ATGAAAAAATTGAGTGACGAATACTTACCTGTTAGAAAAGCTCAAAGCTGTT<br/> TATGGGAGTATTTTCAGGAAATTATGCTTTTAGAGGTGAAAAACCATATGG<br/> TTTGAATCGACCCTTGAGCGTGATTTTCATACTTAAGCAAGAATTTAATAACA<br/> ATGTGATTGATGTTATCGGTCAACCTGTAGTTATCCCCTACATCACTGAAT<br/> TGGGTAATCAATCAAACCTACACCCCTGACTTTTTGGTGCAGTTTTCAAGCT<br/> CGAATTGTGATGATTTTGAGGATTTCCCTGTACCTATGCTTATTGAAATTA<br/> GCCAAGAAAAAGCTTGCTGAGGACTGGGATAAGTTAAAACCAAATTTA<br/> GAGCAGCTCATCGTTTTGCTGCTGATAAAGGATGGAAGTTCAAATTATCA<br/> GTGAAACAAGATTATATGATCAGTATTGGGAAAATATTAATTTCTAAAAAA<br/> ATTTAGACGCTCTCATATAGATGCCGTTGATCAACAATTACTCGATAC<br/> CCTACAAAAGTTAGGTCAATCAACAATTAATCAATTACCTGCTCATCTTTTT<br/> AAAGATAAAACCAATGTTCTAAAAGGGATTCACCAAGTTTGGGCACTAGTG<br/> GCAAAGCGAATGATTGCTTGTGACTTGTATTGCCCTTAAACGGCTGAAACT<br/> GTGATATGGGTTAACCAAATGATGCGTTTGTGAGGAATATCTAA<br/> ATGATTAGTCTTATAACTGCCACATATAATAGAGAAAACTTCTCAAAAAGT<br/> TATATGAGAGTTTATGTGTACAAACCGTTAAAAAGTTTGAGTGGATTGTAAT<br/> TGATGATGGTAGTATAGATAAAACAGATGAGTTAATAAATAGTTTTAAATTA<br/> GATAATATTATTGATATTACCTATTTGAAAAAACAATGGTGGGAAGCATA<br/> CTGCTATGAATATTGGTGTGAAATAGCTAAGTACGCTTATGTTTTTTTTAT<br/> AGATAGTGATGATTTTCTTCCCTAACGATAGTATAGAAAAATTATCAATTAT<br/> ATTGATAAGGTTTCTGCTAGAGAAGACTATTCAGAAATATCGGGAGTCTGT<br/> GGTCTGATTGCTGACTTTCAAGGTAATTTAATCGGTAATAATTCAGAA<br/> AACTTATGCTGTAGCTATATAGATTATAGATATAAATATCATATTAAGGTG<br/> ATAAGGCTGAAATTTTTAAGAGAGAGGTTCTGCTAGAATATAAATTTCCAG<br/> TTATTGAAAAAGAAAAATTTTGCCAGAAAGCCTTAGTGTGGAATAGAATTT<br/> CCGATAAATATAAAATGTATTTTTTTAATGAAGTTATATATTATAGAGAGTAT<br/> TTGGAGGGTGGGTTATCTGATAGAAGTGTTGAAATAAGAAAAAAGGCTCC<br/> CATATCAACATTATTATATTATAAAGAATTATATTTAAATAAAAAATTTAAATT<br/> GGTATTATAGAATAAGAGCTTATATAAATTATATGAGATTTAAGTTTATTCT<br/> TAA</p> |
| <i>group_2056</i> | hypothetical protein | C2     | M | Glycosyltransferase, group 2 family protein | <p>ATGGCGATGAATAAGACAATGGCACCAATAGCAATCGAGAGCGTACCGGT<br/> TAATAAAATACGGAAATTTGTGACTTCCCTAAGCGTTAATATACCTACCGC<br/> ACCGGAAAGGGCGAGCGCCATAAACATAATCCCGTTTAGCCATGCCGATG</p>                                                                                                                                                                                                                                                                                                                                                                                                                                                                                                                                                                                                                                                                                                                                                                                                                                                                                                                                                                                                                                                                                                                                                                                                                                                                                                                                                                                                                                                                                                                                                 |
| <i>group_2057</i> | hypothetical protein | C2     | / | hypothetical protein                        | <p>ATGGCGATGAATAAGACAATGGCACCAATAGCAATCGAGAGCGTACCGGT<br/> TAATAAAATACGGAAATTTGTGACTTCCCTAAGCGTTAATATACCTACCGC<br/> ACCGGAAAGGGCGAGCGCCATAAACATAATCCCGTTTAGCCATGCCGATG</p>                                                                                                                                                                                                                                                                                                                                                                                                                                                                                                                                                                                                                                                                                                                                                                                                                                                                                                                                                                                                                                                                                                                                                                                                                                                                                                                                                                                                                                                                                                                                                 |

|                   |                      |             |   |                      |                                                                                                                                                                                                                                                                                                                                                                                                                                                                                                                                                                                                                                                                                                                                                                                                                                                                                        |
|-------------------|----------------------|-------------|---|----------------------|----------------------------------------------------------------------------------------------------------------------------------------------------------------------------------------------------------------------------------------------------------------------------------------------------------------------------------------------------------------------------------------------------------------------------------------------------------------------------------------------------------------------------------------------------------------------------------------------------------------------------------------------------------------------------------------------------------------------------------------------------------------------------------------------------------------------------------------------------------------------------------------|
| <i>group_2058</i> | hypothetical protein | C2, C6      | / | hypothetical protein | <p>ACGTGTGGAAAATTTTTGCCAGTAAAGATGGCATAAGCGATAGGAAGAA<br/> CCACTGACCATCCAAAGTGCAATGTTAATCGGGCTAATACTCAATAAAGCG<br/> CTTTTTGTCTGTGGCGGAATGGCCATATTGGGTTTTAATGAAGCAAGTGCA<br/> CCGGATCTTCTTTGTGCGGTCTCTGGAGTAAGAAAACCTTAAAATGAGTTCA<br/> CAAATAAGAAGAAAACATAAGAACTCAAAAACAAGCTGTAAGGGGTGGGC<br/> AGAGAATTGCAAAATAGAACAAGTCAGAAAAATCCCAACAGCCATACTAT<br/> CATTGGTGCAATACTATTAATTAGTGAACCATGA</p> <p>ATGTTGATCTTGATTGGTATGGCACTTGTAGCGTTATCGGTCTACCGTGGT<br/> ATAAGTTTAGGCAGAGATTTAGAAGGCTCGTCGGTAACCCAACCTATCCAAT<br/> AGCATGTATATTCAGGAAATGGTAATCGCGCAGATTAAGCAGGCTTGGTA<br/> TTGTATTGTCGGTTTTACCGGAGCAACTATGATTGCAATGGGGGTATGGC<br/> ATACCTGGCTATCTTAA</p>                                                                                                                                                                                                                               |
| <i>group_2059</i> | hypothetical protein | C2, C6      | / | hypothetical protein | <p>ATGGCAGACGTGGGCGATGGCGGTCGCTTCCATTTCCACGGCGATCGCC<br/> TGCGGGAAATTATGGCGGATCTTCGCCAGACCGACAGAGCCGTTAATGAA<br/> GGCATCCCCGCTAACGATGAGGCCGCGAACGGCGTTGAGATCTAA<br/> GTGGCTTTAGCACCACCACCTACAGCAGCAGCATTTTCATTTGTAGCCTCA<br/> GCTCCTTTACCAATTGCTGCTGAATTATCACCTGTTGCCTGCGCACCACTA<br/> CCAATTGCTGCAGAACTGTTCCCAGTCGCTTTTGTCTCTTCACCCGGTTTA<br/> TTACCAGAGCCAATTGCTGTTGAATTTGTACCCGATGCCAATGAGTTAATA<br/> CCCATTGCCGATGCGCCATCACCTGTTGCTTGTGCAACAGCACCGAATGC<br/> AGCGGCACCTTTACCCGAAGCATTTGACATGACGCCAAAAGCAGAAGAAG<br/> CATCACCAGTTGCTTTAGAGGTCATACCAAAGCAGAAGAAAACGCTCCT<br/> GTACCTACAGCTTGA</p> <p>ATGAGTGAATCAAAAGTTAGACATTTGGTACTTAAAGAGTTTCAGATAAAT<br/> CTTCTCATCTTGCTCTTTGTGACGAGGAAACAGGTATTCCATTAGCTGGAT<br/> TAACCGCTGTAAAAATGAATTGTAGTGTTTTTTGAGGGTCCAGCGACTATCA<br/> CGGCAACATTTGATGTAGGTGGTCCTCAAGGCATCCGCTTAGTTGGTGAT<br/> GAACCTAGACAAAAGGTTTGGAGTGCAAAGGAAACGTAG</p> |
| <i>group_2063</i> | hypothetical protein | L7, L10     | / | hypothetical protein | <p>ATGAGCACACCACAATATCAAACAATGAAAGAAAGTGAAGTTTGAATGCC<br/> ATCGGATGGGGGTTAATTGTTCTAGGTATTATATCTGGATTTATTTTTATAC<br/> TTGTGTTTGGCCGAGTTGAAGTTCCAAGAACTTATTATGGCACCGAGACC<br/> GTATGGTCAGGAATCATGGTTATTACAGGTATCGGGATAATCTTAAATGGA</p>                                                                                                                                                                                                                                                                                                                                                                                                                                                                                                                                                                                                                                                   |
| <i>group_2102</i> | hypothetical protein | A2, A3, A14 | / | hypothetical protein | <p>ATGAGTGAATCAAAAGTTAGACATTTGGTACTTAAAGAGTTTCAGATAAAT<br/> CTTCTCATCTTGCTCTTTGTGACGAGGAAACAGGTATTCCATTAGCTGGAT<br/> TAACCGCTGTAAAAATGAATTGTAGTGTTTTTTGAGGGTCCAGCGACTATCA<br/> CGGCAACATTTGATGTAGGTGGTCCTCAAGGCATCCGCTTAGTTGGTGAT<br/> GAACCTAGACAAAAGGTTTGGAGTGCAAAGGAAACGTAG</p>                                                                                                                                                                                                                                                                                                                                                                                                                                                                                                                                                                                                     |
| <i>group_2115</i> | hypothetical protein | A2, A3, A14 | / | hypothetical protein | <p>ATGAGTGAATCAAAAGTTAGACATTTGGTACTTAAAGAGTTTCAGATAAAT<br/> CTTCTCATCTTGCTCTTTGTGACGAGGAAACAGGTATTCCATTAGCTGGAT<br/> TAACCGCTGTAAAAATGAATTGTAGTGTTTTTTGAGGGTCCAGCGACTATCA<br/> CGGCAACATTTGATGTAGGTGGTCCTCAAGGCATCCGCTTAGTTGGTGAT<br/> GAACCTAGACAAAAGGTTTGGAGTGCAAAGGAAACGTAG</p>                                                                                                                                                                                                                                                                                                                                                                                                                                                                                                                                                                                                     |

group\_  
2148

hypothetical  
protein

A2, A3,  
A14

/

hypothetical protein

TTCTTAGTGGGCTATCTGTTCCAAAAGGTTGCCAGCATATTGAGATATCAC  
GAGAACAAGAGCGCATCTTAA  
ATGACTTGGAGTGCACATGAGGTCTATGACAGCTTTCAGGTTATACCTGAT  
AATGATTTAAAACCTCATTCAATTTTTTTACTGCGAATGCCATCCCGAATATG  
TGGATGGCATTTTTTATTCATAACTCATTATTTATGGTAGAGAAGCGACTTAA  
ATGAGTACTGATGCGGCTCGGGATAAAGCCATCCGGATCGAGGCGCAAG  
AAGATTTATATTTCTTCACAAGGTACATGTTTAAAGGAGCGCCGTGGTTATA  
AATGGATGCAAAATTGGCACCCTTAGAAATCTGCGAAGCTTTAATGAAAG  
TTTATCGCGGAGAGATAAAGCGGTTAATTATTAACGTTCCACCACGATATT  
CTAAAAGTAAATTGCTGTAATTAATTTTCATGGCTTGGTGTGTTTGGTAAGAA  
TCCAGACTGTGAGTTTATTCATATCAGTTACTCGGCAATGCTTGCCGCAAA  
TAATGCCTTCCAAATACGAACCTTGTACAAGAAGAGGCGTATAGAAAAGT  
CTTTCCTGAGCTTACATTGCGTGATGATAGTAAGGCTAAAGACTTCTGGAG  
AACTTCTCAAGGCGGTGTCTGCTATGCGACAGGTACAGGCGGTACGATTA  
CTGGTTTTGGTGCAGGAAAACCTTCGTAAGGCTTTGGTGGCTGCATTATTA  
TTGATGACCCACATAAAGCACATGAAGCTTCATTAAAAAGTATTCGAGAAG  
GGGTAATTGATTGGTTTTCAGAACACACTCGAATCGCGTACTAACTCGCCA  
GATACGCCGATCATTGTGATTATGCAGCGACTTCATGAAGATGATTTAGCT  
GGATGGTTGCTAGGTGATAGAAAAGACGGCGTTCCCTGTAGCTGGTGGTAA  
CGGTGAAGTGTGGGAGCATCTATGTCTTTCAGCTATTCAGGAAGACGGAT  
CCGCACTGTGGCCAGCAAAACACAATATCCAAAATTGAGGCTAATGGAG  
CAAGCAGCACCATATGTATTTGCCGGGCAGTACCGACAAATGCCATCACC  
GCCAGCAGGCGGTTTTTTAAGCCCAGCAATATTCAAATTGTTGATGCTTT  
GCCTGCGGATGTAGTGAAACAAGTTAGGGCTTGGGATTTTGGGGCTACC  
GAAAATGAGGGCGACTTTACAGTAGGTGTGCGAGAAGCTCTAGGCGCAG  
ATGGTTTTACTTACATTGTCGATGTAAGTACTAGAGGACAGCTTGGACCTGACA  
ATGTGAATAAGCGCTTAGAACAAACAGCAAAAATAGATGGGAAAAAGTTT  
CTGTGCGTCTACCACAAGATCCCGGTCAAGCTGGTAAATCACAAGCTAGT  
TCATTTGTGAAGCTTCTTGCGGGTTATAGCGTGATAGCTAAGCCAATTTCA  
GGTGACAAGCTTACACGTGCACAACCATTTGCGGCCCAAGTTAACGTAGG  
AAATGTACGAATGCTCAAAGGTGAATGGAATAAGGATTTTATTGATGAGCT  
TCGTCATTTTCTAATGGCACACATGACGACCAAGTGGATGCAGCTTCAG

group\_  
2153

hypothetical  
protein

A2, A3,  
A14

S

Terminase RNaseH-like domain



|                   |                                               |             |   |                                             |                                                                                                                                                                                                                                                                                                                                                                                                                                                                                                                                                                                                                                                                                                                                                                                                                                                                                                                                                                                                                                                                                                                                                                                                                                                                                                                                                                                                                                                                                                                                                                                                                                                                                                                                                                                                                                                |
|-------------------|-----------------------------------------------|-------------|---|---------------------------------------------|------------------------------------------------------------------------------------------------------------------------------------------------------------------------------------------------------------------------------------------------------------------------------------------------------------------------------------------------------------------------------------------------------------------------------------------------------------------------------------------------------------------------------------------------------------------------------------------------------------------------------------------------------------------------------------------------------------------------------------------------------------------------------------------------------------------------------------------------------------------------------------------------------------------------------------------------------------------------------------------------------------------------------------------------------------------------------------------------------------------------------------------------------------------------------------------------------------------------------------------------------------------------------------------------------------------------------------------------------------------------------------------------------------------------------------------------------------------------------------------------------------------------------------------------------------------------------------------------------------------------------------------------------------------------------------------------------------------------------------------------------------------------------------------------------------------------------------------------|
| <i>group_2299</i> | hypothetical protein                          | A2, A3, A14 | S | Uncharacterized conserved protein (DUF2280) | <p>ATGCGTTTAATGAATTACATGAAGGTTTTGAAGCCTTCTTTGCTGATATGG<br/> GATTTGCTCGATGA</p> <p>ATGGCGACACTAAAAGAGCCTGTGAAAATCTTTATAGTTCAGTCTCTTGCT<br/> TGTCGTGATACACCTCAAGAAGTGGCTGAACTCGTAAAACAAGAGTTTGG<br/> CGTTGATATAGATCGTGTTCAAGTTGCAACTTATGACCCTACAAAGGTTGC<br/> TGGTAAGAACTTAAGCAAAAAGTATGTGCGAACTATTTGAAAAAACCAGAGA<br/> TGAGTTTGATAAAGGCTTAATTGATATTCCAATTGCTAATAAGTACTACCGA<br/> TTGAAGCAATACCAAAGACAACCTTGAGAAGACTAGAAACGTCAAACAGC<br/> CTTAAAAATCTTGAGCAAGCCGCTAAAGACATTGGTGGTCAATTTACTAA<br/> TCGCCAAGAAATTACAGGCAAAGACGGCGGACCAGTCCAAACAGTTAATT<br/> CAGAAATTCCAGTTCCAATGGAAGATTACTTAAAAGCGCGGAGGGAAGTC<br/> TTAGATGAGTACTGA</p> <p>GTGGTCAAAGCCCATAGTGGACACATGGCGACAGCAGATTTTGTAGCGCA<br/> GGCAATTGAGCGTGCCGTAGAAAAATCAAATATGCCTAAAGGCGTATTTAA<br/> CATGATCTACGGTAATGGTGTGGGTGAACCACTGGTTAAGCATCCTTTAAT<br/> TCAAGCTGTGGGTTTTACAGGTTTATTGCGTGGTGGACGAGCTTTATGTG<br/> ATATGGCCGCAGCCCGTCCACAACCGATTCCGGTGTGGTGGTAAATGAGC<br/> AGTATTAACCCGATGCTGATGTTGCCAGAAGCCTTAAAAAACCCTGGTGA<br/> AAAAATTGCACAGGATTTGGCAGATTCAGTGGTTTTAGGCTGTGGTCAGTT<br/> CTGTACCAATCCGGGTTTAATCTTGGGAATTAATCAGCTGAATTTAGTCA<br/> GCTCATTAAACAACCTGACCGACATTATGGGGGCTAAGCCTGCGCAGACTA<br/> TGCTCAATGCCGGCACCTTAAAAAGTTACACCGCTGGTCTTGAGCACTTG<br/> ACCCAGCATCAAGGCATTAAGCATTGGGCTGGCAATACTCAACAAGGTAA<br/> TCAGGCGCAGCCACAACCTGCTTAAAGCTGATGTTGAGCTTTTACTGGCGG<br/> GTGACCAGCTTTTACAAGAAGAAATCTTTGGGCCAACACAGTCGTCATT<br/> GAAGTTGAAGATAAAGCCCAACTCATTGAGGCACTACAAAGTATGAATGG<br/> GCAATTGACTGCGACTTTAATTGCCGATGAAGCTGACTTAACCGAGTTTGC<br/> AGATGTAGTTCCAGTTTTAGAGGAAAAAGCCGGTCGATTACTTATAAATGG<br/> CTACCCAACCTGGTGTGAGGTCTGTGATGCCATGGTTCATGGTGGGCCAT<br/> ACCCAGCCACTTCAGATGCACGAGGTACTTCAGTTGGAACCTTGCCATT<br/> GACCGTTACTTGCGCCCTGTGTGTTACCAGAACTATCCACAGAGTCTATT<br/> GCCGGAAGCCTTAAAAGACAGCAACCCGTTGCAGATTTTAAAGATTGGTCA<br/> ATGGTGAGATGACCAGAGAAGCGATCTAA</p> |
| <i>group_23</i>   | Alpha-ketoglutaric semialdehyde dehydrogenase | L8          | C | Aldehyde dehydrogenase family               | <p>ATGCGTTTAATGAATTACATGAAGGTTTTGAAGCCTTCTTTGCTGATATGG<br/> GATTTGCTCGATGA</p> <p>ATGGCGACACTAAAAGAGCCTGTGAAAATCTTTATAGTTCAGTCTCTTGCT<br/> TGTCGTGATACACCTCAAGAAGTGGCTGAACTCGTAAAACAAGAGTTTGG<br/> CGTTGATATAGATCGTGTTCAAGTTGCAACTTATGACCCTACAAAGGTTGC<br/> TGGTAAGAACTTAAGCAAAAAGTATGTGCGAACTATTTGAAAAAACCAGAGA<br/> TGAGTTTGATAAAGGCTTAATTGATATTCCAATTGCTAATAAGTACTACCGA<br/> TTGAAGCAATACCAAAGACAACCTTGAGAAGACTAGAAACGTCAAACAGC<br/> CTTAAAAATCTTGAGCAAGCCGCTAAAGACATTGGTGGTCAATTTACTAA<br/> TCGCCAAGAAATTACAGGCAAAGACGGCGGACCAGTCCAAACAGTTAATT<br/> CAGAAATTCCAGTTCCAATGGAAGATTACTTAAAAGCGCGGAGGGAAGTC<br/> TTAGATGAGTACTGA</p> <p>GTGGTCAAAGCCCATAGTGGACACATGGCGACAGCAGATTTTGTAGCGCA<br/> GGCAATTGAGCGTGCCGTAGAAAAATCAAATATGCCTAAAGGCGTATTTAA<br/> CATGATCTACGGTAATGGTGTGGGTGAACCACTGGTTAAGCATCCTTTAAT<br/> TCAAGCTGTGGGTTTTACAGGTTTATTGCGTGGTGGACGAGCTTTATGTG<br/> ATATGGCCGCAGCCCGTCCACAACCGATTCCGGTGTGGTGGTAAATGAGC<br/> AGTATTAACCCGATGCTGATGTTGCCAGAAGCCTTAAAAAACCCTGGTGA<br/> AAAAATTGCACAGGATTTGGCAGATTCAGTGGTTTTAGGCTGTGGTCAGTT<br/> CTGTACCAATCCGGGTTTAATCTTGGGAATTAATCAGCTGAATTTAGTCA<br/> GCTCATTAAACAACCTGACCGACATTATGGGGGCTAAGCCTGCGCAGACTA<br/> TGCTCAATGCCGGCACCTTAAAAAGTTACACCGCTGGTCTTGAGCACTTG<br/> ACCCAGCATCAAGGCATTAAGCATTGGGCTGGCAATACTCAACAAGGTAA<br/> TCAGGCGCAGCCACAACCTGCTTAAAGCTGATGTTGAGCTTTTACTGGCGG<br/> GTGACCAGCTTTTACAAGAAGAAATCTTTGGGCCAACACAGTCGTCATT<br/> GAAGTTGAAGATAAAGCCCAACTCATTGAGGCACTACAAAGTATGAATGG<br/> GCAATTGACTGCGACTTTAATTGCCGATGAAGCTGACTTAACCGAGTTTGC<br/> AGATGTAGTTCCAGTTTTAGAGGAAAAAGCCGGTCGATTACTTATAAATGG<br/> CTACCCAACCTGGTGTGAGGTCTGTGATGCCATGGTTCATGGTGGGCCAT<br/> ACCCAGCCACTTCAGATGCACGAGGTACTTCAGTTGGAACCTTGCCATT<br/> GACCGTTACTTGCGCCCTGTGTGTTACCAGAACTATCCACAGAGTCTATT<br/> GCCGGAAGCCTTAAAAGACAGCAACCCGTTGCAGATTTTAAAGATTGGTCA<br/> ATGGTGAGATGACCAGAGAAGCGATCTAA</p> |

|                   |                      |             |   |                                                         |                                                                                                                                                                                                                                                                                                                                                                                                                                                                                                                                                                                                                                                                                                                                                                                                                                                                                                                                                                                                                                                                                                                                                                                                                                                                                                                                                                                                                                                                                                                                                                                                                                                                                                                                                                                                                                                              |
|-------------------|----------------------|-------------|---|---------------------------------------------------------|--------------------------------------------------------------------------------------------------------------------------------------------------------------------------------------------------------------------------------------------------------------------------------------------------------------------------------------------------------------------------------------------------------------------------------------------------------------------------------------------------------------------------------------------------------------------------------------------------------------------------------------------------------------------------------------------------------------------------------------------------------------------------------------------------------------------------------------------------------------------------------------------------------------------------------------------------------------------------------------------------------------------------------------------------------------------------------------------------------------------------------------------------------------------------------------------------------------------------------------------------------------------------------------------------------------------------------------------------------------------------------------------------------------------------------------------------------------------------------------------------------------------------------------------------------------------------------------------------------------------------------------------------------------------------------------------------------------------------------------------------------------------------------------------------------------------------------------------------------------|
| <i>group_2322</i> | hypothetical protein | A2, A3, A14 | / | hypothetical protein                                    | <p>ATGTTATATTTTTTAAAACATCAGAATTTATACAATATGAAAACAATAGCTTT<br/> TGTATGTCTAACCCTAATTTCCATCACTTGTTTAGCTGAACCAAGTCAAAAA<br/> TATCTTAAAGAATATGATCGATTGTCTGAAGCTTTGGAGTCAGCAATGGCA<br/> AATGCATATTCTTTTGATCCTGCAACTGGTCAAGTAAACAGGCTACTCAA<br/> GGTTTAGAAGCTAAAAATAATTTATGTAGAGCTGCCAGGCGAAACTAAAC<br/> CTCACCACGTTTTTAAAAGACAATTTAGAGGAATCTAAAGAGCTTTATAAAT<br/> CTATTGATGGTGCAGAGACTCTAGATAAAAATTATCTTAGTGGACAACAGC<br/> AGGAACAACAAAATCTCGTTTCAAATTTGAAAAAGACCTTGTTGGAAGT<br/> GATTTAACTGTGAGTAA</p> <p>ATGAAAAAGATTTTATTAGCGGGATTTCTTGATTGGGCTTAGCGGGGTGT<br/> GCGACAACCTCCCAACAACCCTCAGAGCCTGTAAAATTTGAAAAGGTTTAT<br/> CAAATTGATGGATTAACCAAGCACAGATTTATGATGGCGCTAGACAATGG<br/> TTCGCTGTAGCTTTTGCTTCTGCTAACGCAGTAATTC AATATGAAGATAAG<br/> GCATCAGGCACTATCATTGGAAAGGGCAATATGCGATACCTTGTTTCGGG<br/> CATGGAGTGCTTGGCAATGACAGGAAACGAACGTGTTGATTTTACTGTAA<br/> GAGTGGACACTAAGGATGGGAAAATGCGCGTGGGTTATGATGGTTTAAAC<br/> TATAGCGCTCCATCGCACATGAGTGCTGGAATAATGATGCCTGCACAAAA<br/> TTACCCTATAACTGAAAGTAGGAAGTCCACACCACTGATTATTAGTAAGAT<br/> TAATACTCTATCGGATGATATGGCTGAAAAGATTA AACTCAGCAGAAAGT<br/> AAATTCGAATTGGTAA</p> <p>ATGGATGATAAAGAGTACTTTTGGCTTACACAAAAAAAAGAGCTCAAACG<br/> AAACCCAAATCCAGACCACTGCCTAAAGCTAAAGAAAAATATCTCGAGGC<br/> CGAAGAAACCTTATTTCAAGAACTAGAAGAGCATCGAATTGGTTATAGAAG<br/> AAAATTTCAATTTGAATCAACAAAAAATTGGCGGTTTCGATTTTATATTGTG<br/> AAGTTGAATCTTCTTATAGAAATTGCTGGCAGTCCGTGGGCAGTTGGCCG<br/> AGGTGGCACAAAGATAGCAAATTCATTTAATAAGTATGATCTAGCACTAGA<br/> CCGAGGTTATGTATTTGAGCGTCTTGAGCCTCACCAAATTGAATCAGGTTA<br/> TGCAATCAACTGGATTA AAGCAAATTAGCGAGAATTGAAGATGGATCAGA<br/> TCAGACCATTTCTCCA ACTGA</p> <p>ATGAGAATCATATTTTCTTTAATTACGTTTGTCTTATTTTCATTTATTTCTTT<br/> ATCCTTTTAAGGAATAAATATATTGAGCCAAACCACTTCGTCATTTTGATAA<br/> TATTTTCTGCAATTGTATCCGCAATAATTGCATATTTTGTATGAGGTTCAAGA<br/> GCTATCTATTGGAGGCAATATCGTTAAACTAAAAGAAGCAAAAAAGGAGTT</p> |
| <i>group_2370</i> | hypothetical protein | A2, A3, A14 | S | Domain of unknown function (DUF4468) with TBP-like fold | <p>ATGAAAAAGATTTTATTAGCGGGATTTCTTGATTGGGCTTAGCGGGGTGT<br/> GCGACAACCTCCCAACAACCCTCAGAGCCTGTAAAATTTGAAAAGGTTTAT<br/> CAAATTGATGGATTAACCAAGCACAGATTTATGATGGCGCTAGACAATGG<br/> TTCGCTGTAGCTTTTGCTTCTGCTAACGCAGTAATTC AATATGAAGATAAG<br/> GCATCAGGCACTATCATTGGAAAGGGCAATATGCGATACCTTGTTTCGGG<br/> CATGGAGTGCTTGGCAATGACAGGAAACGAACGTGTTGATTTTACTGTAA<br/> GAGTGGACACTAAGGATGGGAAAATGCGCGTGGGTTATGATGGTTTAAAC<br/> TATAGCGCTCCATCGCACATGAGTGCTGGAATAATGATGCCTGCACAAAA<br/> TTACCCTATAACTGAAAGTAGGAAGTCCACACCACTGATTATTAGTAAGAT<br/> TAATACTCTATCGGATGATATGGCTGAAAAGATTA AACTCAGCAGAAAGT<br/> AAATTCGAATTGGTAA</p> <p>ATGGATGATAAAGAGTACTTTTGGCTTACACAAAAAAAAGAGCTCAAACG<br/> AAACCCAAATCCAGACCACTGCCTAAAGCTAAAGAAAAATATCTCGAGGC<br/> CGAAGAAACCTTATTTCAAGAACTAGAAGAGCATCGAATTGGTTATAGAAG<br/> AAAATTTCAATTTGAATCAACAAAAAATTGGCGGTTTCGATTTTATATTGTG<br/> AAGTTGAATCTTCTTATAGAAATTGCTGGCAGTCCGTGGGCAGTTGGCCG<br/> AGGTGGCACAAAGATAGCAAATTCATTTAATAAGTATGATCTAGCACTAGA<br/> CCGAGGTTATGTATTTGAGCGTCTTGAGCCTCACCAAATTGAATCAGGTTA<br/> TGCAATCAACTGGATTA AAGCAAATTAGCGAGAATTGAAGATGGATCAGA<br/> TCAGACCATTTCTCCA ACTGA</p> <p>ATGAGAATCATATTTTCTTTAATTACGTTTGTCTTATTTTCATTTATTTCTTT<br/> ATCCTTTTAAGGAATAAATATATTGAGCCAAACCACTTCGTCATTTTGATAA<br/> TATTTTCTGCAATTGTATCCGCAATAATTGCATATTTTGTATGAGGTTCAAGA<br/> GCTATCTATTGGAGGCAATATCGTTAAACTAAAAGAAGCAAAAAAGGAGTT</p>                                                                                                                                                                                                                                                                                                                                                                                                                                                                                                  |
| <i>group_2407</i> | hypothetical protein | A2, A3, A14 | S | Protein conserved in bacteria                           | <p>ATGAAAAAGATTTTATTAGCGGGATTTCTTGATTGGGCTTAGCGGGGTGT<br/> GCGACAACCTCCCAACAACCCTCAGAGCCTGTAAAATTTGAAAAGGTTTAT<br/> CAAATTGATGGATTAACCAAGCACAGATTTATGATGGCGCTAGACAATGG<br/> TTCGCTGTAGCTTTTGCTTCTGCTAACGCAGTAATTC AATATGAAGATAAG<br/> GCATCAGGCACTATCATTGGAAAGGGCAATATGCGATACCTTGTTTCGGG<br/> CATGGAGTGCTTGGCAATGACAGGAAACGAACGTGTTGATTTTACTGTAA<br/> GAGTGGACACTAAGGATGGGAAAATGCGCGTGGGTTATGATGGTTTAAAC<br/> TATAGCGCTCCATCGCACATGAGTGCTGGAATAATGATGCCTGCACAAAA<br/> TTACCCTATAACTGAAAGTAGGAAGTCCACACCACTGATTATTAGTAAGAT<br/> TAATACTCTATCGGATGATATGGCTGAAAAGATTA AACTCAGCAGAAAGT<br/> AAATTCGAATTGGTAA</p> <p>ATGGATGATAAAGAGTACTTTTGGCTTACACAAAAAAAAGAGCTCAAACG<br/> AAACCCAAATCCAGACCACTGCCTAAAGCTAAAGAAAAATATCTCGAGGC<br/> CGAAGAAACCTTATTTCAAGAACTAGAAGAGCATCGAATTGGTTATAGAAG<br/> AAAATTTCAATTTGAATCAACAAAAAATTGGCGGTTTCGATTTTATATTGTG<br/> AAGTTGAATCTTCTTATAGAAATTGCTGGCAGTCCGTGGGCAGTTGGCCG<br/> AGGTGGCACAAAGATAGCAAATTCATTTAATAAGTATGATCTAGCACTAGA<br/> CCGAGGTTATGTATTTGAGCGTCTTGAGCCTCACCAAATTGAATCAGGTTA<br/> TGCAATCAACTGGATTA AAGCAAATTAGCGAGAATTGAAGATGGATCAGA<br/> TCAGACCATTTCTCCA ACTGA</p> <p>ATGAGAATCATATTTTCTTTAATTACGTTTGTCTTATTTTCATTTATTTCTTT<br/> ATCCTTTTAAGGAATAAATATATTGAGCCAAACCACTTCGTCATTTTGATAA<br/> TATTTTCTGCAATTGTATCCGCAATAATTGCATATTTTGTATGAGGTTCAAGA<br/> GCTATCTATTGGAGGCAATATCGTTAAACTAAAAGAAGCAAAAAAGGAGTT</p>                                                                                                                                                                                                                                                                                                                                                                                                                                                                                                  |
| <i>group_2423</i> | hypothetical protein | A2, A3, A14 | / | hypothetical protein                                    | <p>ATGAAAAAGATTTTATTAGCGGGATTTCTTGATTGGGCTTAGCGGGGTGT<br/> GCGACAACCTCCCAACAACCCTCAGAGCCTGTAAAATTTGAAAAGGTTTAT<br/> CAAATTGATGGATTAACCAAGCACAGATTTATGATGGCGCTAGACAATGG<br/> TTCGCTGTAGCTTTTGCTTCTGCTAACGCAGTAATTC AATATGAAGATAAG<br/> GCATCAGGCACTATCATTGGAAAGGGCAATATGCGATACCTTGTTTCGGG<br/> CATGGAGTGCTTGGCAATGACAGGAAACGAACGTGTTGATTTTACTGTAA<br/> GAGTGGACACTAAGGATGGGAAAATGCGCGTGGGTTATGATGGTTTAAAC<br/> TATAGCGCTCCATCGCACATGAGTGCTGGAATAATGATGCCTGCACAAAA<br/> TTACCCTATAACTGAAAGTAGGAAGTCCACACCACTGATTATTAGTAAGAT<br/> TAATACTCTATCGGATGATATGGCTGAAAAGATTA AACTCAGCAGAAAGT<br/> AAATTCGAATTGGTAA</p> <p>ATGGATGATAAAGAGTACTTTTGGCTTACACAAAAAAAAGAGCTCAAACG<br/> AAACCCAAATCCAGACCACTGCCTAAAGCTAAAGAAAAATATCTCGAGGC<br/> CGAAGAAACCTTATTTCAAGAACTAGAAGAGCATCGAATTGGTTATAGAAG<br/> AAAATTTCAATTTGAATCAACAAAAAATTGGCGGTTTCGATTTTATATTGTG<br/> AAGTTGAATCTTCTTATAGAAATTGCTGGCAGTCCGTGGGCAGTTGGCCG<br/> AGGTGGCACAAAGATAGCAAATTCATTTAATAAGTATGATCTAGCACTAGA<br/> CCGAGGTTATGTATTTGAGCGTCTTGAGCCTCACCAAATTGAATCAGGTTA<br/> TGCAATCAACTGGATTA AAGCAAATTAGCGAGAATTGAAGATGGATCAGA<br/> TCAGACCATTTCTCCA ACTGA</p> <p>ATGAGAATCATATTTTCTTTAATTACGTTTGTCTTATTTTCATTTATTTCTTT<br/> ATCCTTTTAAGGAATAAATATATTGAGCCAAACCACTTCGTCATTTTGATAA<br/> TATTTTCTGCAATTGTATCCGCAATAATTGCATATTTTGTATGAGGTTCAAGA<br/> GCTATCTATTGGAGGCAATATCGTTAAACTAAAAGAAGCAAAAAAGGAGTT</p>                                                                                                                                                                                                                                                                                                                                                                                                                                                                                                  |

group\_  
2497

hypothetical  
protein

A2, A3,  
A14

/

hypothetical protein

ACAAGTAACAATAGATCAATTAAGTCAATTAAGTTTCAACATATCGGATG  
TTACTTTTGAAAAGTTTACATTTTTCAGGTGTTTTTGGAAAGCAGCCATTTAG  
TGGATAGTAGAGCAGAATATTTTTTTCCTCATCAATGAAATTAACAATC  
GGATTGTTCAATGATCTTAAGTCTGAAATAAAAGTTCAATTAACAAGGTTG  
TTAATTGATCAATTAATAAATTTTATCCTTTATTTTATGGCAAACAATTCAA  
TGATAGCGATGAATCCCTAAATCTACGGTTTTTTATATCGAGTTGAAAGAT  
GAGATTATTGATAAAGTTCATCAAAAACGGACACCTGTTATACCATTTGAT  
CAAAAAAGCAGGAAATTGTTACAGCTATAGATAACTATGCAGCTTTGTAT  
ATTTTATTTAAGAAGTTGAACAGTAG  
ATGCAAGTTTTAATGGCTTTGGCATACCCTTTACAGGGCATGATATGGGC  
TTACGTGACGAAATTCAGGCAGACATTGCTGAAGCATTTAATGATGATTTA  
GCAGATGCCATTCATACCTTTACATGTGAGCGGATCTCTAAAACGAATTGG  
GATCCTAAAACCTGAACTTATGTTGAAGTTAAAGAAAACCTATTCTGGCCGT  
GGCGTTCTGTTTGGCTCATAACAGTCAATATGAGATCCAAACCTTGGAGTA  
CTGGCCACGGATAAAAAGGCTACAGTGCTGCAGAATGAAGTTACCAAAGA  
GCCAAAGATTGATGATGAGTGGTTAACAGCCTTAGGCTCATTCCGGGTAA  
TTCATATTCAACAGGATCCAGCTTCTACTATTTGGAAATGTCAGTTGAGGA  
AGGTTTAA  
ATGATTGAATCTAATGCTGTCAATATCGATCGTAGTCGTATCATTCTAAAAC  
CCAATGTGGTTGTCGGTTATGAGGGGCAACCCTATAAAATTGTGAATGTTT  
TAAATGCCAATGACATTGTTATATCAAGTCTTGATTCCGGTACGTAGTCTAC  
AGGTCAATGCTAGAAGTTTGACCATTTTTAATGGGGGAAATACGCTAACTG  
AGCGTTTGAATAAGGGTGATCAGGATATTAGTAATGAAGCTTGGCAGATT  
GCTTTACAACGTTATGAGATTATTAAGCCTTTGATTGAGTATTCAACGACT  
GAACTGGTCGAAAATAGGGCGAATGAATATGATGTGAATCGCTCAACATT  
GTGGAATGGCTTAAAGATTATCGGGAAAATAATTCTCTAATGGCATTGAT  
TCCCAAAAACGAGGTTGGACAACCTGAAAATCAAGGTTGTCACCTCAAG  
TGAGCAATATCATTAAACAAGCTATCAATGATGAATTTTGAATGCGAAGA  
AACCCAGTATTTCCAAAACGATTGAAATTGAAAAGCAGAGTGTCTCGGC  
TTCAGCTTGAAGCACC GCATGAAAACCTATTCGTAGAAGAATCGAGGCTT  
TAAATGATTACCAAGTAACGAAAGCACGTCTTGGATCTAAAGCTGCAATAG  
ATAAATTTAAGGCTGCTGCTGGTTCATTTCCAATGCTGATTACCTTTGG  
CATATGTGCAGATTGATCATAACCTCTAGATATTGAAATCGTGGATGACG

group\_  
25

hypothetical  
protein

L7, L8,  
L9

L

Mu transposase, C-terminal

group\_  
2532

hypoth  
etical  
protein

A2, A3,  
A14

/

hypothetical protein

AGTTTAGAGAAGCGATTGGAAAACCTCATTTAACCTTGGCAATCGATGTTT  
TCAGTCGGATGATCGTAGGGTATTACCTATCACTAGAAGCGCCAAGTACG  
ACTTCAGTGGCGATGTGTATCGCATCTTGTATTTTTGTCAAAAAACGTAAG  
TTGATCGAACTCGATATTGATGCTGAATGGCAGGTGCAAGGGATTATGGA  
CTCGGTGCATACAGATAATGGCCCCGATTTTAGAACCAATCACATCAGTAA  
AGCTTGTCTAAAGTATGGGATTCATTGGGAATACCGACCAATTGGTGGGG  
CAAGATTTGGCGGTCATATCGAGCGTATGCTTGGTATCGTCAATCTTGAAA  
TGCATGTCTTGGATGGTACAACCTTTTTCAAATGTACAGCAGCGTGGGACTT  
ATGATTCCGCTAAACAAGCCTGTATGACATTAAGAGCTTGAATACTATA  
TCGTGTATTGGATTACTAAAGTTTATCACCAGAAGAAACATTCCGCTTTAG  
GAACATCCCCAATCGTTAAATGGGAAGAAGGTGTTTGGGGGACGAAGAC  
GACAGCAGGTACAGGTTTGAAAGAACGTGTATCAGATGAAGATACCTTGT  
TTATTGATTTTCTACCTGAATTTGAAGCGACTATTCAGCGTACAGGGGTGC  
AAAAAGATAACTTATTCTATTTTGCCGACTGTTTAAGACAATGGGTTAATTC  
TATTGATCCAGAGGACAATAATCGAAAGCGCAAAAGAAAATTCTTGTTTAA  
ACGTGATCCGAGGGATATTTACAGATTTGGTTTTATGAGCCATATTCTAA  
TACCTATTTTAAAGTACCTACCGCAAAGCGAGAGATACCACCGATTAGCTT  
ATTTGAATATAAGCAGGTTTCAGAACTATCTCAAAAGTGAACGTCAGGATGT  
TCAGAATCAGGATGAGATTTACAAGGCGATTTTGCATCTACGTGATCAACT  
TAATCAGGCTAGAAGCTTGACTCGAAAGCAACGTCGCTCAAACCAAAGAA  
AAAAGGAAAATGCAAAAGCCATTACTCAGCTTTCCGAACAGAATCAGTCTA  
AAAAGGCTGTAGTTTCTGAAAGTCTTCAGACAAGTGATGATTTGTGGAGTA  
CTCCTTTAACTGCATTTGACGATTTAAGGTGA  
ATGAAACTTAAAACAGTAACAATCGACGGTAAAGTTTATGCGGAAGTAGAC  
GGTGATAAGCCGATCTATATTCATGATGACGGCAAAGAAAATGCCACATGA  
TGCACCACACTCGGTAGCAACAATTGCACGCTTAAACAATGAAGCTAAAA  
CACATCGTGAAGCCAAAGAAGCAGCCGAAAAAGCATTAAAAGCTTTTGAA  
GGAATTGAAGACCCAGCGGCAGCTAAAAAGGCATTACAAACAATCCAAAA  
TCTCGATGATAAAAAGCTGGTGGATGCCGGTGAAGTTGAGAAAAGTTAAAG  
CTGAAGCTATCAAAGCAGTTGAGGAAAAATATGCCCCGATTGTTGCGCAA  
CGTGATGCTCTAGAAGCCTCTTTACATAAAGAAGCTTATCGGCGGTGGTTTT  
GCTCGTTCTAAGTACATTCAAGACAACATTGCAGTACCTGTGGACATGGTT  
CAGGCAACCTTTGGTCATCACTTCAAAATCGAAGAAGGCAAGGTGGTTGC

|                   |                        |             |   |                                                  |                                                                                                                                                                                                                                                                                                                                                                                                                                                                                                                                                                                                                                                                                                                                                                                                                                                                                                                                                                                                                                                                                                                                                                                                                                                                                                                                                                                                                                                                                                                                                                                                                                                                                                                                                                                                                                                                 |
|-------------------|------------------------|-------------|---|--------------------------------------------------|-----------------------------------------------------------------------------------------------------------------------------------------------------------------------------------------------------------------------------------------------------------------------------------------------------------------------------------------------------------------------------------------------------------------------------------------------------------------------------------------------------------------------------------------------------------------------------------------------------------------------------------------------------------------------------------------------------------------------------------------------------------------------------------------------------------------------------------------------------------------------------------------------------------------------------------------------------------------------------------------------------------------------------------------------------------------------------------------------------------------------------------------------------------------------------------------------------------------------------------------------------------------------------------------------------------------------------------------------------------------------------------------------------------------------------------------------------------------------------------------------------------------------------------------------------------------------------------------------------------------------------------------------------------------------------------------------------------------------------------------------------------------------------------------------------------------------------------------------------------------|
| <i>group_2537</i> | Beta-lactamase OXA-133 | A2, A3, A14 | M | Penicillin binding protein transpeptidase domain | <p>ATATGATCCGAACGGCGAAAAGATTTATTCACGTGTCCGCCCGGGTGAAC<br/> TTGCAAATGTTGATGAAGCTTTAGAGTCATTGGTTGGTGGATACCAGCATA<br/> AAGACTTAATTCTTAAAGGTGGTAAAGGAACTGGTGGCGGTTTTCAAGGT<br/> GGGGCAAAGGTGGAGCACCTACTGGAATGAAACGCAGTGAAATGTCTG<br/> TTTCTCAGAAAGCAGATTACATCAAAGAACATGGCAATGATGCCTTCCTAA<br/> AACTACCGAACTAA<br/> ATGAATAAATATTTTACTTGCTATGTGGTTGCTTCTCTTTTTCTTTCTGGTT<br/> GTACGGTTCAGCATAATTTAATAAATGAAACCCCGAGTCAGATTGTTCAAG<br/> GACATAATCAGGTGATTCATCAATACTTTGATGAAAAAACACCTCAGGTG<br/> TGCTGGTTATTCAAACAGATAAAAAAATTAATCTATATGGTAATGCTCTAAG<br/> CCGCGCAAATACAGAATATGTGCCAGCCTCTACATTTAAAATGTTGAATGC<br/> CCTGATCGGATTGGAGAACCAGAAAACGGATATTAATGAAATATTTAAATG<br/> GAAGGGCGAGAAAAGGTCATTTACCGCTTGGGAAAAAGACATGACACTAG<br/> GAGAAGCCATGAAGCTTTCTGCAGTCCCAGTCTATCAGGAACTTGCGCGA<br/> CGTATCGGTCTTGATCTCATGCAAAAAGAAGTAAAACGTATTGGTTTCGGT<br/> AATGCTGAAATTGGACAGCAGGTTGATAATTTCTGGTTGGTAGGACCATTA<br/> AAGGTTACGCCTATTCAAGAGGTAGAGTTTGTTCCTCAATTAGCACATACA<br/> CAGCTTCCATTTAGTGAAAAAGTGCAGGCTAATGTAAAAAATATGCTTCTT<br/> TTAGAAGAGAGTAATGGCTACAAAATTTTTGGAAAGACTGGTTGGGCAATG<br/> GATATAAAACCACAAGTGGGCTGGTTGACCGGCTGGGTTGAGCAGCCAG<br/> ATGGAAAAATTGTCGCTTTTGCATTAATATGGAAATGCGGTCAGAAATGC<br/> CGGCATCTATACGTAATGAATTATTGATGAAATCATTAAACAGCTGAATAT<br/> TATTTAA<br/> ATGTCTAATATAGCACAAATCAACGATACCAAATATCAATTGTTAACTTCA<br/> AATCTGTTCCAGTTGTTACTACAGCAATGCTTGCTGATTTCTATGGAACCG<br/> ATACAGACAACATCAAACAAAACCTATTCTCGAAATAAAGAGCGGTTTGTAG<br/> AAGGTAAACACTTCTTCAAATTTATTGGTGAAGAATTGAAAAATTTGTAGG<br/> TGACTTAAAGTCACTTGCAAATTTCCCTGCAATTTCAAATAAACTCGATCC<br/> CTTATCTTATGGACAGAACGCGGTGCTGCACGTATGCCAAGATGTTAGA<br/> CACAGACCAAGCATGGGAAGTTTTCGAGCAACTTGAGGATTGCTATTTTGT<br/> CCGTAAAGAGATTTTAGCCAAAACCCACAAATCAGAACGTGAACCCCTAA<br/> CCAATGCTGTAAATCTTCTTGTAGCTAAAATAAGCATTTGAATTACAGCG<br/> ATGCTTATAAATTAGTTCATCAGCGTTTCAATGTTTCAGCATATTGATGAAAT</p> |
| <i>group_2575</i> | hypothetical protein   | A2, A3, A14 | K | ORF6N domain                                     |                                                                                                                                                                                                                                                                                                                                                                                                                                                                                                                                                                                                                                                                                                                                                                                                                                                                                                                                                                                                                                                                                                                                                                                                                                                                                                                                                                                                                                                                                                                                                                                                                                                                                                                                                                                                                                                                 |

group\_  
2587

hypothetical  
protein

A2, A3,  
A14

/

hypothetical protein

TCCATACGATGTAATACCTGTGGCTGTGGAGTATGTTCCACCACTTAATTGC  
TATGTACAGCAAGGCTGAAAAACAAGGTTCTTTATTTGATGAAGATCAATT  
TAAGCTGCTCAAGAACCTAATTGATGCAATTATTTCCCAAACCTTTGCGAC  
TAGTCGAATCTATCGAGCAGTACATATGCTTAACAACGAGCAAGGACACTA  
CTTAGCTGAATATGCTTTTAAACTAATATTGCAGTTCTAAACTTACTCGG  
GCAATGGATTTAAGAGGGCCACTTAATAGAAAAATCATTAGTGATGATTTA  
AAAACCATAAGCTACACAACAGGCAATCAACATTATAGCGACCGTTGGTTT  
CATCCATTGATGGAATCGGGAATGCTAGCTGGTGCTTTGCGAATTTCTGG  
TGGTTGGTAG

ATGAAGATTATCTATACACGCATTGCAGCAGCGGCTGCATTAGAGACAGG  
CATTATTGCTAACCCCTGACTATTATGAAAACCCAAATTTGAAAGCAAAAGA  
GGTAATTATTTACGGTAATTATCCAAAGATTCAAAGGATTATGAATCTTTG  
GAAGTCCAGTTGAAGTTCGTAAGTTGGAAGTGCCACAAAAACGACTTT  
GGCCACAGTAAATGTCGCAGTGGGAATTACCCCTGAACTTCAAGCTGTGA  
TGGATGATGCAAAAGCTGAATGTGAAAAGGTAGTTGAAGAAAACACTCAG  
CTTAAGCAGAAAATTGCCATCTTAGAGCAGGCCGGTGGTAACCAGTCAGA  
GTTGTTATCTGAAAATTCACGATTAAGATGCAGCAGTCTTAGCAGATAA  
AGCTCTCAAAGATGCTGAAGCTCAAGTGGTCCGTATAAAAACTGAATTTGA  
AGCTTTTAAAAATGATATTCCTGCAATGCAGGCACGTATTGCTGAATTGGA  
AGCTGGAAAAGCGGCAGAAAACCCAGCTACAGAAACGGCAGCTAATGATT  
TTGAAAACCTGGTCAAATGATCAATTAAGAGTATTTGGCTAGTAAAAACAT  
TGGTTACAAGCCGTCTGCAACAAAAGCAGAACTTCTTAAATTAATCCCGAA  
GGAATAA

group\_  
26

*tnsB\_1*

Transposon  
Tn7  
transposition  
protein  
TnsB

L6, L7,  
L8

L

Mu transposase, C-terminal

ATGATTGAATCTAATGCTGTCAGTATTGATCGTAGTCGTATCACACTTAAA  
CCCAATGTGGTTGTTGGTTATGAGGGAAACCCTTATAAAATTGTGAATGTT  
TTAAATGCTAATGACATTGTTATATCAAGTCTTGATTCCGGTACGTAGTTTAC  
AGGTCAATTCTAAAAGTTTTGACCGTTTTTGGAGGGAGAAAATACGCTAACTG  
AAAACCTAAACAAAGGTGATAAGGATATCAGCAATGAAGCTTGGCAGATT  
GCTTTACAACGTTATGAGATTATTAAGCCTTTGATTGAGTATTCAACCACTG  
AACTGGTTGAAAATAGAGCGAATGAATATGATGTAAATCGTTCTACATTGT  
GGAAGTGGCTTAGAGATTATCGTGAAAATAACTCTCTAATGACGTTGATTC  
CCAAAAACGAGGTTGGACAACCTGAAAATCAAGGTTGTCACCTCAAGTG  
AGCAATATCATTAAACAAGCTATCAATGATGAATATTTGAATGCGAAGAAA

group\_  
2626

hypoth  
etical A2, A14 /  
protein

hypothetical protein

CCTAGTATTTCCAAAACGATTGAAATTGTAAAAGCAGAGTGTTACGGCTT  
CAGCTTGAAGCACCATGAAAACCTATTTCGTAGAAGAATCGAGGCTTTA  
AATAATTACCAAGTAACGAAAGCACGTCTTGGATCTAAAGCTGCAATAGAT  
AAATTTAAGGCTGCTGCGGGTTCATTCCCAAATGCTGATTACCCTTTGGCA  
TATGTGCAGATTGATCATAACCTCTAGATATTGAAATCGTGGATGACGAG  
TTCAGAGAAGCGATTGGAAAACCTCACTTAACCTTGGCAATCGATGTTTTT  
AGTCGGATGATTGTTGGATATTACCTATCACTAGAAGCACCAAGTACGACT  
TCAGTGGCGATGTGTATAGCATCTTGTATTTTGTCAAAAAACGTAAGTTG  
ATCGAACTAAATATTGATGCTGAATGGCAGGTGCAAGGTATTATGGACTC  
GGTGCATACAGATAATGGACCCGATTTTAGAACCAATCACATCAGTAAAGC  
TTGCCTAAAATATGGGATTCATTGGGAATATAGACCAATTGGTGGGGCGA  
GATTTGGCGGTCATATTGAACGTATGCTTGGTATTGTCAATCTTGAATGC  
ATGTGCTGGATGGTACAACTTTTTCAAATGTGCAGCAGCGAGGAACTTAT  
GATTCCGCTAAACAAGCCTGTATGACATTAAGGAACCTGAATACTATATC  
GTTTATTGGATTACTAAAGTTTATCATCAGAAGAAGCATTACAGCTTTAGGAA  
CATCACCTATTGTTAAATGGGAAGAAGGTGTTTGGGGAACGAAGACGACA  
GCAGGAACAGGTTTGAAGAACGTGTATCAGATGAAGATACCTGTTTTATT  
GATTTTCTACCTGAATTTGAAGCGACCATTACAGCGTACAGGGGTGCAGAA  
AGATAACTTATTCTATTTTGCAGACTGTTTAAAGCAATGGGTTAATTCTATT  
GATCCAGACGACAATAATCGAAAGCGCAAAAGAAAATTCTATTTAAGCGT  
GATCCGAGGGATATTTACAGATTTGGTTTTATGAGCCATTTTCTAATACC  
TATTTTAAAGTACCCACTGCAAAGCGAGAGATACCACCGATTAGCTTATTT  
GAATATAGACAGGTACAGAACTATCTCAAGAATGGGCGTCAGGATGTTCA  
GAATCAGGATGAGATTTACAAGGCGATTTTACATCTACGTGAGCAGCTTAA  
TCAGGCTCGAAGCTTGACTCGAAAGCAACGTGCTCAAACCAAAGAAAA  
AGGAAAATGAAAAAGCCATTACTCAGCTATCCGAACAGAATCAGTCTAAAA  
AGGCTGTAGTTTCTGAAAGCCTTCAGACAAGTGATGATTTGTGGAGTACTC  
CTTTAACTGCATTTGATGATTTAAGGTGA  
ATGAAAGCATCTAAATTGATTAGAGATAAAGGACTGCAATACGCGAAGGAA  
ATCGTAGATTCAGCACCCGATAACGCAACTGAATGGAACGAGGGTTATGA  
GTTCCAATGTGGTCAAAGTGTAGAAATCAGCCCAGCAGATCGTGAGAAGT  
ATTTTGTAGATTTGGTTGAGCTTAAACGTCTGGTGGAGTCTTTGAAAATCA  
TCAGCGATTTAGGTGGAGTTGAGAAGCTAACGCCTGCATTCATTACGACA

group\_  
2627

hypothetical  
protein

A3

/

hypothetical protein

GATAAGCATGTTGGTTACACGCATGTTCCGCATGGTGGGAAATGGGAGATT  
GAGCTTTCTTGATGATTTTTGCGACTTCATTCCAGATGGTCCATTTCAATT  
AAGCGTGTGATGACTGCTATCCGCGACCACGAATCAATATACGGAGGCG  
GTGAATCTCATGCCAACTAG  
ATGAAAGCATCTAAATTGATTAGAGATAAAGGACTGCAATACGCGAAGGAA  
ATCGTAGATTCAGCACCCGATAACGCAACTGAATGGAACGAGGGTTATGA  
GTTCCAATGTGGTCAAAGTGTAGAAATCAGCCCAGCAGATCGTGAGAAGT  
ATTTTGTAGATTTGGTTGAGCTTAAACGTCTGGTGGAGTCTTTGAAAATCA  
TCAGCGATTTAGGTGGAGTTGAGAAGCTAACGCCTGCATTCATTACGACA  
GATAAGCATGTTGGTTACACGCATGTTCCGCATGGTGGGAAATGGGAGATT  
GAGCTTTCTTGATGATTTTTGCGACTTCATTCCAGATGGTCCATTTCAATT  
AAGCGTGTGATGACTGCTATCCGCGACCACGAATCAATATACGGAGGCG  
GTGAATCTCATGCCAACTAG  
ATGGACAATACCACGGCTCATATTGTTGCGATGACAGGTTCCATACTTCCGT  
GGCGATAGCGTTCCTGTACTTACGCCTGAAGATGAAGCGAAGTTTGATAA  
AGTTTCTTTAACTATTACGAACAACCTCAATGGGTATAGCTATTTAAAGTCA  
TTAGGCATTGGTTATCACTTCTATAAAGGCCGCTACTTTGCAGAAGATGAT  
GAAGGGGTTATCGCAATTGCTGAAGTTTTAGATACCGATAAAAAACCATA  
ATTCACATTCCAAATGTAATTCAGGTGAATCAACCAAAGATAAATATGATG  
AAGTGGACGCGATCCTCGAAATCATTGGTGAATTTGTCGCTAAAGATCCT  
CATACTGGAATTATCACCGTCAAGCGTGCAGATGGTAAGATCTTAAAAGTA  
GCAGACCTCGTTGAAGAAGATGGTTCGTGATAAAGTTGTTGAATATCTACGT  
AACATTTAAACCGTAGATGATCTTGATCTCATCATTGCCCTAGGCATGGCG  
AAAGAAGGCTTTGACTGGCAATTCTGTGAACATGCTTTAACGATTGGTTAT  
CGTGGCTCTTTGACTGAAATTGTGCAGATTGTGGGACGTTGTACACGAGA  
TAGCTCAAACAAATCACATGCGCAGTTTACCAATCTTATTGCTCAACCTGA  
TGCACAGGATACTGAAGTTAAATTTGCAGTAAACAACATGCTGAAAGCAAT  
TACTGCATCTTTGTTAATGGAACAAATACTTGCACCAAACCTCAAGTTTAAA  
ACCAAACGTGATGATGAAGATATTGTTCCGCCAGGAACACTAACGATTTAAA  
GGTTTTAAAGAACCAAGCACGGCAAAAACAAAGGCGATTATTGAAAATGAT  
CTTGTGGATCTAAAAGCAGTGATTCTTCAAGATGCTAAAGTGATTGCAGGT  
TCAGCAGGTAAGGTTGAGCCTGAAGTGGTGAATAAAATCCTTATTCCCAA  
GATTATCCAAACAAAATATCCTGACTTAACGAAAGCAGAAGCTTGAAGAAGT

group\_  
266

hypothetical  
protein

A2, A3,  
A14

L

helicase



|                   |                      |             |   |                      |                                                                                                                                                                                                                                                                                                                                                                                                                                                                                                                                                                                                                                                                                                                                                                                                                                                                                                                                                                                                                                                                                                                                                                                                                                                                                                                                                                                                                                                                                                                                                                                                                                                                                                                                                                                                                                                                                                                          |
|-------------------|----------------------|-------------|---|----------------------|--------------------------------------------------------------------------------------------------------------------------------------------------------------------------------------------------------------------------------------------------------------------------------------------------------------------------------------------------------------------------------------------------------------------------------------------------------------------------------------------------------------------------------------------------------------------------------------------------------------------------------------------------------------------------------------------------------------------------------------------------------------------------------------------------------------------------------------------------------------------------------------------------------------------------------------------------------------------------------------------------------------------------------------------------------------------------------------------------------------------------------------------------------------------------------------------------------------------------------------------------------------------------------------------------------------------------------------------------------------------------------------------------------------------------------------------------------------------------------------------------------------------------------------------------------------------------------------------------------------------------------------------------------------------------------------------------------------------------------------------------------------------------------------------------------------------------------------------------------------------------------------------------------------------------|
| <i>group_2748</i> | hypothetical protein | A2, A3, A14 | / | hypothetical protein | <p>GAGTCAGTATTTAGTCGTGGACTCAGTGATTAGCACAGCAGAAGTCAAAG<br/> AAGTTGGCGATAAAAAGTTTATTCTGAATGGCAGATAAATTTATCAATATCG<br/> AAGACCTGAATATTGATTTAATTCGAATCTGTGAATCCTTTCCAAAAAGCGTT<br/> TGAAATCCTATCAAAAAGAAGTCACAGTCAATGTGCTCAAATTTGATTAAGGA<br/> AGCAATTGAAGCAACTAAGATTAGTATGACTCAAGAAGAAGCCATTGAGCT<br/> ATGGCCTAAGTTAAAAGCCTTCAAAGTTCAGTTTGGTTCGTGAGCCTAGTCT<br/> AGAGTCAAATAACTTAATTGAAAAACGATTAGCCGAATGCCTAATCTATAT<br/> CCGTGAGCAACGTAGACGAGCTGGAGTGTA<br/> ATGCGAACATTTATATACTTGGATGAAAGTGGTGATTTAGGTTGGAATATG<br/> GAAAAGCCTTATCAAAAGGGTGGTTCCAGTCGAATGCTTACGTTAGCAGC<br/> AATCTGTTTGCCTGAGAATAAGGTTAAGTATGTTTACGCGTATTGTAAGAGC<br/> ATTATATGAAAAAGAAAAAGACCTTTAAAAAATGAATTAATAATCAGTTGAT<br/> TTGAATCTAAAAGATAAAGAAATATTCGTCAAATTGACTGCGAACTTATCA<br/> AAGACCATCCAGATATACAACCTTCGCTCAATTACAGCAAATAAAGAATTTG<br/> TTAATGCAAGATTCAAGAACGACCCAAATGCTTTCTATAATTATATGGTGAA<br/> ACTTTTACTTCTTGGGACTATCTGCAAGCATAAATATGTAGATTTTATGCCT<br/> GACAGAAGAAGTGAGCGGGTTTCGTTGAAATGGAATATGGGTGAGTATTT<br/> AAAACAGATGGTTTTAGAGTGTGGCATTGAAAACCAAATTGTTAACCAGTC<br/> ATGCAATATTATGCCAATGGATAGCTCAAAGTGCCTTGAGCTACAATTTAT<br/> AGACTTCTATGCAGGTTTAGTCTGGTCGGCATATGAATTTAAGACATGAC<br/> TGCAAGAAAATTCATGGCAGAAAACCGAAATACCAACCATAAGCTTTTCTT<br/> TCCAAAAGAAGACAAAGTGGATAACATTGTTGATGAAGCTGTCTAA<br/> ATGCCAAGCCCTATTATCCAATATTTCCAATATGAACATTTACCTGAACATT<br/> TGCAGCAAGTTAGTAAGCCAATTGGTGATTTAGCTCGGCAAATGGATGAG<br/> CAACTTCTGACGGGCTGAAAAATCCACAGGATTAAGAAAGCTACTTGA<br/> AGCAAAAAGATGCATTTGTACGCCAAGCTTTAAGTAAATAA<br/> ATGGTCTCACGTTTAACTTTATTTCTCAAAGTACGGTGGCTAAAATGACA<br/> ATGACTTTAGAGCAGACAAGGCAAGCTATTATTGATCGCATGCAAAGCTTT<br/> ACAGGTATTACGCAAGACAGAATCCAGTATCCAAATTTACCAGGCTTTAAT<br/> GTACCTAAAGATGGTGTTTGGTGCCGCTTAACGATTGCAGGTGGTCCCAG<br/> TTTTACTTCTGGCATTGCAGATAAGCCATGTACTCGCCGTACCGGTAATAT<br/> CATGATTCAATGCTTTGCACGTCCCAATTCAGGAATAATTGAAATCACAAA<br/> ATTGAGTGATGCATTAATTTGCTCATTGCTCAATTTGCAATCGAACACTTA</p> |
| <i>group_2780</i> | hypothetical protein | A2, A3, A14 | / | hypothetical protein |                                                                                                                                                                                                                                                                                                                                                                                                                                                                                                                                                                                                                                                                                                                                                                                                                                                                                                                                                                                                                                                                                                                                                                                                                                                                                                                                                                                                                                                                                                                                                                                                                                                                                                                                                                                                                                                                                                                          |
| <i>group_2784</i> | hypothetical protein | A2, A3, A14 | / | hypothetical protein |                                                                                                                                                                                                                                                                                                                                                                                                                                                                                                                                                                                                                                                                                                                                                                                                                                                                                                                                                                                                                                                                                                                                                                                                                                                                                                                                                                                                                                                                                                                                                                                                                                                                                                                                                                                                                                                                                                                          |

|                   |                      |             |   |                                 |                                                                                                                                                                                                                                                                                                                                                                                                                                                                                                                                                                                                                                                                                                                                                                                                                                                                                                                                                                                                                                                                                                                                                                                                                                                                                                                                                                                                                                                                                                                                                                                                                                                                                                                                                                                                                                                                                     |
|-------------------|----------------------|-------------|---|---------------------------------|-------------------------------------------------------------------------------------------------------------------------------------------------------------------------------------------------------------------------------------------------------------------------------------------------------------------------------------------------------------------------------------------------------------------------------------------------------------------------------------------------------------------------------------------------------------------------------------------------------------------------------------------------------------------------------------------------------------------------------------------------------------------------------------------------------------------------------------------------------------------------------------------------------------------------------------------------------------------------------------------------------------------------------------------------------------------------------------------------------------------------------------------------------------------------------------------------------------------------------------------------------------------------------------------------------------------------------------------------------------------------------------------------------------------------------------------------------------------------------------------------------------------------------------------------------------------------------------------------------------------------------------------------------------------------------------------------------------------------------------------------------------------------------------------------------------------------------------------------------------------------------------|
| <i>group_2815</i> | hypothetical protein | A2, A3, A14 | S | Phage Mu protein F like protein | <p>GAATGTTTGAATGGCCAATCTATTTATGCGGGTAAAGATGCTGACTTCATT<br/> CAATACAATGTATCAATAAGTTTTTTAGTTAACTAA<br/> ATGGCAACAGATATCAAAAACTATTTGAAGTACTCACTCAGCACCAGGCC<br/> TATCTTTATCGTGCTTCATCAAAAACGGTAAATGAGTTATTGGCTTTATTCA<br/> ATGATGATACGAGCAAGATGCTATCTAAGCTTCGGGATTTATTGGATGAGC<br/> TTAATGAGTCCGAGAAAGTTGCTTTAGCTGGTGGTAAATATACAACCTCAA<br/> ATTTAAGGGAAATTAGGGATTTGATTGCCCAATGGTTTGCCAGTGTTAATT<br/> TAGCATTACCTGAAGCTTTTGCCGTTTCTGCTACGGCGCTGGCTGTTTATG<br/> AGGCCAATTACGTAGCTAAGCTCTATGGAGCAAAAATTAATAAGCCTGATG<br/> GGGAAAACTATTCTTATCCGCTAAAAAAGTTCCGTTGGCAGGTGGCGCT<br/> CTTGTCGATGATCTGCTTTCAAGAATTGCTGAAAGTGCCCGTCAAAGGTT<br/> GAGTATGCAATTCGAGATGGTATTAATTCAGGCAAACTAACCAAGAAATT<br/> GTTCCAGCGTATTCGTGGTACCAAACGGCTTAACTATGAAGATGGGATCTTA<br/> AATGGTACCAAACTGATATTGAGCGAACGGTAAGAAGTGTGCGAAGTCA<br/> TGTAGCTAATCAAGCCTATCTAAATAGCTTCAACCAAATTGGCTTTGAATAT<br/> GTCCGATTTGTTAGCGTTTTAGATGGACGAACCTTCTAAGCTTTGCGCTTCA<br/> TTAGATGGTTCAGTGTGGGAAATAAATGATCCGGCAAAGCGAGTGCCGCC<br/> GTTACATCCTAACTGTGCGCAGTATCTTGTTCCGGTCGAGAAGGACGGTC<br/> AACTTGTGGCGAACGGCCATTTGTAATGGACGAACGTAGAGTTAAAGAC<br/> ATCCCCAAAGAAGAGCGAAGCCAGTTAATAGGACAGTTAGATGCAAACAC<br/> CACATTCAAAGAGTTCTTTAAGAAAACAGATGATTTCTTTCAAAGGGAGTG<br/> GCTAGGGCCAAAGCGCTTTAAGCTCTATAAAGATGGGAAATTTGATTTTGA<br/> TAAGTTCTTTGATCCTGAAGGCCGTTTCTATAGCTTAGATGATTTGAGAAA<br/> GTTGGATGAAAAAGCTTTTTAAAAAGTTGGGTCTGTAA<br/> ATGCCAACTAGATATAACACAGGCGAGTATAGCTACGATCTTGAATATCAC<br/> TATGGAGATATGTCAGCAAGCATGGAGATGCTTAGAGCACGTTTAATTGAA<br/> TTGTTGACTCCTCATCTGTCTGACCGTTATGTGAAATGGAGAGAAGCATAT<br/> TTCACATGGTTTACAAAGTGCGGCGGGGATTCGGGGTGGATGTTTTGTGT<br/> AGGTCCACACGAATTTTATATTGATGGGGCGTTAAGGCGCTATTACTCAG<br/> GTTCTATTGATATTACCTACAACCAGAAAGATCGATATTTCTTGGTGGGTG<br/> AGAAAAAGAAAGTCAAATGTAAGGCTTGTAAAGGGTTTGGCTTCATTCTGA<br/> GATGATGGGTGGGGGCATATAGATAAATGTGAAACGTGTGATGCAGAAAA<br/> AGGAGCCAGCCATGAGTGA</p> |
| <i>group_282</i>  | hypothetical protein | A2, A14     | / | hypothetical protein            | <p>GAATGTTTGAATGGCCAATCTATTTATGCGGGTAAAGATGCTGACTTCATT<br/> CAATACAATGTATCAATAAGTTTTTTAGTTAACTAA<br/> ATGGCAACAGATATCAAAAACTATTTGAAGTACTCACTCAGCACCAGGCC<br/> TATCTTTATCGTGCTTCATCAAAAACGGTAAATGAGTTATTGGCTTTATTCA<br/> ATGATGATACGAGCAAGATGCTATCTAAGCTTCGGGATTTATTGGATGAGC<br/> TTAATGAGTCCGAGAAAGTTGCTTTAGCTGGTGGTAAATATACAACCTCAA<br/> ATTTAAGGGAAATTAGGGATTTGATTGCCCAATGGTTTGCCAGTGTTAATT<br/> TAGCATTACCTGAAGCTTTTGCCGTTTCTGCTACGGCGCTGGCTGTTTATG<br/> AGGCCAATTACGTAGCTAAGCTCTATGGAGCAAAAATTAATAAGCCTGATG<br/> GGGAAAACTATTCTTATCCGCTAAAAAAGTTCCGTTGGCAGGTGGCGCT<br/> CTTGTCGATGATCTGCTTTCAAGAATTGCTGAAAGTGCCCGTCAAAGGTT<br/> GAGTATGCAATTCGAGATGGTATTAATTCAGGCAAACTAACCAAGAAATT<br/> GTTCCAGCGTATTCGTGGTACCAAACGGCTTAACTATGAAGATGGGATCTTA<br/> AATGGTACCAAACTGATATTGAGCGAACGGTAAGAAGTGTGCGAAGTCA<br/> TGTAGCTAATCAAGCCTATCTAAATAGCTTCAACCAAATTGGCTTTGAATAT<br/> GTCCGATTTGTTAGCGTTTTAGATGGACGAACCTTCTAAGCTTTGCGCTTCA<br/> TTAGATGGTTCAGTGTGGGAAATAAATGATCCGGCAAAGCGAGTGCCGCC<br/> GTTACATCCTAACTGTGCGCAGTATCTTGTTCCGGTCGAGAAGGACGGTC<br/> AACTTGTGGCGAACGGCCATTTGTAATGGACGAACGTAGAGTTAAAGAC<br/> ATCCCCAAAGAAGAGCGAAGCCAGTTAATAGGACAGTTAGATGCAAACAC<br/> CACATTCAAAGAGTTCTTTAAGAAAACAGATGATTTCTTTCAAAGGGAGTG<br/> GCTAGGGCCAAAGCGCTTTAAGCTCTATAAAGATGGGAAATTTGATTTTGA<br/> TAAGTTCTTTGATCCTGAAGGCCGTTTCTATAGCTTAGATGATTTGAGAAA<br/> GTTGGATGAAAAAGCTTTTTAAAAAGTTGGGTCTGTAA<br/> ATGCCAACTAGATATAACACAGGCGAGTATAGCTACGATCTTGAATATCAC<br/> TATGGAGATATGTCAGCAAGCATGGAGATGCTTAGAGCACGTTTAATTGAA<br/> TTGTTGACTCCTCATCTGTCTGACCGTTATGTGAAATGGAGAGAAGCATAT<br/> TTCACATGGTTTACAAAGTGCGGCGGGGATTCGGGGTGGATGTTTTGTGT<br/> AGGTCCACACGAATTTTATATTGATGGGGCGTTAAGGCGCTATTACTCAG<br/> GTTCTATTGATATTACCTACAACCAGAAAGATCGATATTTCTTGGTGGGTG<br/> AGAAAAAGAAAGTCAAATGTAAGGCTTGTAAAGGGTTTGGCTTCATTCTGA<br/> GATGATGGGTGGGGGCATATAGATAAATGTGAAACGTGTGATGCAGAAAA<br/> AGGAGCCAGCCATGAGTGA</p> |

|                  |                      |             |   |                      |                                                                                                                                                                                                                                                                                                                                                                                                                                                                                                                                                                                                                                                                                                                                                                                                                                                                                                                                                                                                       |
|------------------|----------------------|-------------|---|----------------------|-------------------------------------------------------------------------------------------------------------------------------------------------------------------------------------------------------------------------------------------------------------------------------------------------------------------------------------------------------------------------------------------------------------------------------------------------------------------------------------------------------------------------------------------------------------------------------------------------------------------------------------------------------------------------------------------------------------------------------------------------------------------------------------------------------------------------------------------------------------------------------------------------------------------------------------------------------------------------------------------------------|
| <i>group_283</i> | hypothetical protein | A2, A3, A14 | / | hypothetical protein | <p>ATGCCAACTAGATATAACACAGGCGAGTATAGCTACGATCTTGAATATCAC<br/> TATGGAGATATGTCAGCAAGCATGGAGATGCTTAGAGCACGTTTAATTGAA<br/> TTGTTGACTCCTCATCTGTCTGGCCGTTATGTGAAATGGAGAGAAGCATAT<br/> TTCACACGTTTTACAAAGTGCGGCGGGGATTCCGGGGTGGATGTTTTGTGT<br/> AGGTCCACACGAATTTTCATATTGATGGGGCGTTAAGGCGCTATTACTCAG<br/> GTTCTATTGATATTACCTACAACCAGAAAGATCGATATTTCTTGGTGGGTG<br/> AGAAAAAGAAAGTCAAATGTAAGGCTTGTAAGGGGTTTGGCTTCATTCTGA<br/> GATGATGGGTGGGGGCATATAGATAAATGTGAAATGTGTGATGCAGAAAA<br/> AGGAGCCAGCCATGAGTGA</p> <p>ATGCCAACTAGATATAACACAGGCGAGTATAGCTACGTTCTTGAATATCAC<br/> TATGGAGATATGTCAGCAAGCATGGAGATGCTTAGAGCACGTTTAATTGAA<br/> TTGTTGACTCCTCATCTGTCTGGCCGTTATGTGAAATGGAGAGAAGCATAT<br/> TTCACATGGTTTTACAAAGTGCGGCGGGGATTCCGGGGTGGATGTTTTGTGT<br/> AGGTCCACACGAATTTTCATATTGATGGGGCGTTAAGGCGCTATTACTCAG<br/> GTTCTATTGATATTACCTACAACCAGAAAGATCGATATTTCTTGGTGGGTG<br/> AGAAAAAGAAAGTCAAATGTAAGGCTTGTAAGGGGTTTGGCTTCATTCTGA<br/> GATGATGGGTGGGGGCATATAGATAAATGTGAAATGTGTGATGCAGAAAA<br/> AGGAGCCAGCCATGAGTGA</p>  |
| <i>group_284</i> | hypothetical protein | A2, A3, A14 | / | hypothetical protein | <p>ATGCCAACTAGATATAACACAGGCGAGTATAGCTACGTTCTTGAATATCAC<br/> TATGGAGATATGTCAGCAAGCATGGAGATGCTTAGAGCACGTTTAATTGAA<br/> TTGTTGACTCCTCATCTGTCTGGCCGTTATGTGAAATGGAGAGAAGCATAT<br/> TTCACATGGTTTTACAAAGTGCGGCGGGGATTCCGGGGTGGATGTTTTGTGT<br/> AGGTCCACACGAATTTTCATATTGATGGGGCGTTAAGGCGCTATTACTCAG<br/> GTTCTATTGATATTACCTACAACCAGAAAGATCGATATTTCTTGGTGGGTG<br/> AGAAAAAGAAAGTCAAATGTAAGGCTTGTAAGGGGTTTGGCTTCATTCTGA<br/> GATGATGGGTGGGGGCATATAGATAAATGTGAAATGTGTGATGCAGAAAA<br/> AGGAGCCAGCCATGAGTGA</p> <p>ATGCCAACTAGATATAACACAGGCGAGTATAGCTACGTTCTTGAATATCAC<br/> TATGGAGATATGTCAGCAAGCATGGAGATGCTTAGAGCACGTTTAATTGAA<br/> TTGTTGACTCCTCATCTGTCTGGCCGTTATGTGAAATGGAGAGAAGCATAT<br/> TTCACATGGTTTTACAAAGTGCGGCGGGGATTCCGGGGTGGATGTTTTGTGT<br/> AGGTCCACACGAATTTTCATATTGATGGGGCGTTAAGGCGCTATTACTCAG<br/> GTTCTATTGATATTACCTACAACCAGAAAGATCGATATTTCTTGGTGGGTG<br/> AGAAAAAGAAAGTCAAATGTAAGGCTTGTAAGGGGTTTGGCTTCATTCTGA<br/> GATGATGGGTGGGGGCATATAGATAAATGTGAAATGTGTGATGCAGAAAA<br/> AGGAGCCAGCCATGAGTGA</p> |
| <i>group_285</i> | hypothetical protein | A2, A3, A14 | / | hypothetical protein | <p>ATGCCAACTAGATATAACACAGGCGAGTATAGCTACGTTCTTGAATATCAC<br/> TATGGAGATATGTCAGCAAGCATGGAGATGCTTAGAGCACGTTTAATTGAA<br/> TTGTTGACTCCTCATCTGTCTGGCCGTTATGTGAAATGGAGAGAAGCATAT<br/> TTCACATGGTTTTACAAAGTGCGGCGGGGATTCCGGGGTGGATGTTTTGTGT<br/> AGGTCCACACGAATTTTCATATTGATGGGGCGTTAAGGCGCTATTACTCAG<br/> GTTCTATTGATATTACCTACAACCAGAAAGATCGATATTTCTTGGTGGGTG<br/> AGAAAAAGAAAGTCAAATGTAAGGCTTGTAAGGGGTTTGGCTTCATTCTGA<br/> GATGATGGGTGGGGGCATATAGATAAATGTGAAATGTGTGATGCAGAAAA<br/> AGGAGCCAGCCATGAGTGA</p>                                                                                                                                                                                                                                                                                                                                                                                                                                                                                                    |
| <i>group_288</i> | hypothetical protein | C4, C6      | S | Phage Terminase      | <p>ATGACTGCAAACTACCAGACTGGACTACAGCTTGCCAGACTGGGCGAC<br/> CCGTATTGTTTCTAAACAATCGTTAATGCCGTGTAAGCCATTATCCCAA<br/> AGTGGCTGACGTAGCGGAGCGTATCTTTAAAGAGTTAATTCTTGTTGATGT<br/> GATGGGTAGCCCTAAGATGGGTGATGTCACATTGGAATGGGTGATCGAGT<br/> TTGTTGTCGCAATCTTTGGCGCATATGATCCAAGCACAAAGCGCAGATTAA<br/> TTCGTGAATCTTTCTTTTGAATTCGAAGAAGAATACTAATCTACGATTGC</p>                                                                                                                                                                                                                                                                                                                                                                                                                                                                                                                                                                                                                                                      |

group\_  
2899

hypoth  
etical  
protein

A2, A3,  
A14

/

hypothetical protein

CGCCGGCATTATGCTTACTGCATTAATTCTTAATGATCGACAATCTGCCGA  
ACTAATTATTCTTGCGCCTACTAAAGAAGTTGCTGATAACTCATTTAATCCA  
ATCCGGGATTTTCATACGCGCAGATGAAGAATTAAGTGAAAAGATTTAATGTA  
TCTGAGCACACAAAAACAGTTACGCATCTAGGTACCGGAGCAACACTTAA  
AGTTATTGCAGCAGAATCTAACGCTGCAGCTGGTAAGAAAGCTTCAATCAT  
TTTGATAGATGAGGTCTGGCTATTCGGGAAACGTGCCAACGCTGAATCAA  
TGTTCCGTGAAGCAAAGGGTGGTTTAGCATCTCGTCCAGAAGGTTGTGTG  
ATTTATCTGTCTACCATGTCCGATGAAGTGCCATGTGGAGTATTTAAGCAG  
CTTTTAGATTATGCCAGAGATGTACGTGACGGAATTAAGTTGATAAAAGT  
TTTCTACCACTTATTTATGAATCCCTAAGCATCTTGTAAGAAGCAGGCCGAA  
CATTTAAACCTGAAAATTTCTACATCACAAACCCAACTTGGGTGCTTCG  
GTTGATCTTGAATATCTGATTTCCGGAATTTAACAAAGTTAAGATGCTAGTG  
AAGAATCTCTTAGAGACTTCTTGGCCAAACACTTAAACATTGAAATCGGCA  
TGAACCTTCGTGCTAACCGGTGGGCGGGTGCAGAGTATTGGAATGCTCAA  
GCTAAAGATATCCAAATCGACCAACTAATTGAGCTATCCGATGTCATTACT  
TTGGGTATTGATGGCGGTGGTCTCGACGACTTACTTGGCTTCGCTGCTTT  
AGGTCGTTTAACAGAAGATCCTCGTATCTGGTGGCTATGGAATCATGCAT  
GGGCAAATAAGATTGCTTTAGAGCGCAGAAAAGAGAATGTGCCTAAGTAT  
GAAGACTTCAAGTCTGAGGGTTCTCTAACTGTTGTTGACCGAATAGGCCGA  
TGACATTGACCAACTCGCAGCAATTGCTAAGAAGTTTTATGACAGTGGAA  
AGCTTAATAAGATCGGACTAGATCCATTGGGCTTAGGCGGTCTTTTAGATG  
GCTTACTTGAGGCAGGAATCCAGAGGAAAGCATGTTTGCTGTGCCACAA  
GGCTACAAACTCATGTCCTACATCCTTACTACTGAGCGCAAATTGGCAGAA  
GGCAATCTGCACCATGCTGGACAACAGCTAATGACTTGGGCGGCAGGTA  
ATGCCCGTGTCTGATGGTCCGCAATGGTATGCGAATAACCAAGCAAGAA  
TCAGGTGTTGGGAAGATTGACCCATTGATTGCCACATTTAACGCAGTTGCT  
TTGATGTCAAGCAATCCTGAGCCTGCCAATCGCGTTGATATTGACGAATAC  
TTAGAGGATGTCGTGATAGCATGA  
ATGGAAGTAAAGAATAATGTTGCTTGTGTTTGCCTGAAAAAGCAGGCTTAACG  
GTTTATGAGCTATCAAAGCGGTGTGGTTTTGTTAGTGGTAGCAGAGTTCTA  
TCAAACCTATGTGACAAGAGCCGAGCAGGGACATTCTGTCAAGATCGATAC  
AGCCTTACTTATATATAAAGAAGTCAAAAAAGTAGGTGTATGTAAAAATTTT  
GAGGATGTATTTTGGCTTGACCACATGGACTAG

|                   |                      |                 |   |                                       |                                                                                                                                                                                                                                                                                                                                                                                                                                                          |
|-------------------|----------------------|-----------------|---|---------------------------------------|----------------------------------------------------------------------------------------------------------------------------------------------------------------------------------------------------------------------------------------------------------------------------------------------------------------------------------------------------------------------------------------------------------------------------------------------------------|
| <i>group_3</i>    | hypothetical protein | L7, L8, L9, L10 | I | 3-oxoadipate CoA-transferase activity | <p>ATGATTGACAAAAGTAAGTCCTCACTAAGCGAGGTTTTATCGCAGATTA<br/> GATGGTGCAACCATTCTGATTGGTGGTTTTGGTACCGCAGGACAACCCGC<br/> TGAACCTATTGACGGTCTGATTGAACTTGGCGTTAAGGACTTGACCATTGT<br/> GAGCAACAATGCCGGTAATGGGGATTATGGTCTGGCTAACTGCTCAAAG<br/> CCGGTTCANNNNNNNNNCCACGTCAGTCTGACTCTTATGTGTTTGATG<br/> AACTGTACCGTGCCGAAAGGTTGAACTTGAAGTGGTACCACAAGGCAAT<br/> CTGGCGTGCCGTATTCAGGCAGCAGGTATGGGCCTTGGGGCGGTGTTTA<br/> CACCAACAGGCTTTGGAACACTTTTAG</p>                    |
| <i>group_3041</i> | hypothetical protein | A2, A3, A14     | / | hypothetical protein                  | <p>ATGACTGAATTTCAAAAAATTACGAATGAGATTAGACAGCTTCAAATAGAG<br/> CTAAACCATTTGGGAAGTTGCAATACAAAAGGTTTAAATACAGAACAGATC<br/> GCTCACCTAGATGAGCGATTTTTTTTTGGCCATAGCAAAGCAACATAAATTA<br/> ATTGCTCGTCTCAACAGTAAGCCAGAGGGCTTTTTATAA</p>                                                                                                                                                                                                                               |
| <i>group_3063</i> | hypothetical protein | A2, A3, A14     | / | hypothetical protein                  | <p>ATGAGCAATTTTGTTTTTAAGCGTGGTGACACATTCAACTTGAATTTGCAG<br/> CTGGTTGATATGGATGAAACCCTGCAGTATCCACCGGATGATGTTCTGTCG<br/> TGCAATTGATCTTACAGGTTATACCTTCACTTCACAGGTTAAAGCTCTGGC<br/> TGATGGCGCTGCTGTGGCTACCTTGACTTGCAGCAGCATTAAACCAGAGCA<br/> CACAGAAGGGATGGCTTAACGTTAAATCAGGTGCAAGTACAGCAGCTTGG<br/> CCTTTAGGTCTGTGCCAGATGGATATTAAGGCTGTTCGTGAATGGAGTTAC<br/> CCAGCATAACAGATACTTTGATTTTCCAAGTGATTGATGGGGTAACAGCATA<br/> A</p>                                  |
| <i>group_3095</i> | hypothetical protein | A2, A3, A14     | / | hypothetical protein                  | <p>ATGAGCTTTATTACTGTAGATGACGCAAATTCAATTTTGGGCAGCGATTTT<br/> GCACCAGACAGTGATAAGGCTCGTCTGGTGAAGCTGGCAAATGTGTGGAT<br/> GAAAAACAGAATTGGTTTTGTACCAGATCCAATTGATCCACTTCTTAAGGA<br/> CGCGGCTTGTGAAATTATCAAAGGAATTCTGGCCAAAGTAATTTATAACGG<br/> CAAAGAGCAGCAGTTGAAGCGTAAGAAAGTTAAGGCTGATTCTGTTGAGT<br/> CAGAAAAAGAATTTCAAGACGGATCTGAAGCAATCTCTAGCTTTGAACAGA<br/> TAGCAATTGATTTTATTGATTCACCTTGATTTGAAAGATCCAAATGCAAGTTT<br/> TAATGGCTTTGGCATACCACTTTACAGGGCATGA</p> |
| <i>group_3141</i> | hypothetical protein | A2, A3, A14     | / | hypothetical protein                  | <p>ATGCTTAAAAAGTCATTACATGATCAAATTAATAAATTGGATTTTGGACCG<br/> TTGGTGGAGTTTTTTGGTATTTAGTTATAGCTTTTTTTCTTAAAAGTAAATAT<br/> CCAATTTTTGATTATAGCTTTAATCTAGAAATTGCATACGACGTCATAAAAG<br/> ATGCTTTAACTCTTGCAGCAAGCTTTTTAGCTCCAGTTGCAGCATTGTTTC<br/> TGTTTAGCGATTGGAGAGTTCAACATAAAGCTCTAAAAAATGAAAAGTTAA</p>                                                                                                                                                        |

group\_  
3166

hypothetical  
protein

A2, A3,  
A14

/

hypothetical protein

GTGAAGATATCTTAAGAATCCTTAACACGGAATTATTATCCTTTTATAATTT  
TAATCCTCGATCAAAATCAGATGTTGAAGATTTTAATAATCATCAAATGCAA  
TTTCATAGGAACGTTGCAAATATTTATGTGATGTTAGATGAAATTGATGCAA  
ATGAAGTGCAGGCAAACCACTTCATTGAAAATATTAATAAATAAGAGTTG  
ATCTAGATGGTTTATACATGAGTATTTTTAAACAAATTGAAATTGTTATTGA  
ACATGATGCGATTTCTGATTTTCTAGATACTCATTCAATGCGTAAAAAAGAA  
ATATTATTAATAAATAAATAAATAAATAAATAAATAAATAAATAAATAAATAA  
AAATTTAATTAAGTAATTTTACAATTGAAACCTTTAAAGTTTAG  
ATGGATCAGATCAGACCATTTCTCCAATTGATTTTATGGATCAGGCAGAA  
GAAGAGGAAGCAATTCGTTTAATACCCGCTCCAGACCTAAAGAAATGGGT  
TGTGGCCAACACTTAACGATAGGTGGACCTCTTTATAACCCTGACCATGA  
CCATATTGCTGAGCTGCTTCACGATAATGAAGAATTTTAGCATTGCTTG  
GGCCTCTTCTGCATATAAAAGTAAGCAAGCTATGGTGTAGGTCAGTGCG  
AAAAAGTCATGTTCAATGTTGGTGGATGGCGTAAGGCCAGACAAGAGCAA  
CAGATGCGTGATTGGTTTGGTTTTGTACCTACTTATTTAATAACTGTGCGAC  
GCTTCTTCTGTGAGCGTGCAAACGATACAGAGTTCTGTTACTTACTTGAA  
CATGAGCTTTACCACATTGGAGTGATGAGAGACGAGGACGGAGAAATTGT  
TTATAGCGATAGTTCTGGTCTTCTAAGCACTATCTTGCTGGTCATGACGT  
TGAAGAGTTTATTGGCGTAGTTAAACGTTATGGACCAAGCAAAAATGTTAA  
GCGACTTATTGAAGTCGCAAAAATCCGCCGTTTGTTCGAATCTTGATAT  
TTCAAAATGCTGCGGCAACTGTGTAATCAATTGA

ATGGCTCTACCGATTACTGCTGACCAAACCTTTATTAGTTCAAGCAATTA  
TTGTGTACCTATACGCTGATCCGGGTTTAGGTAATCATCGATGGGCTTTA  
CTGCGGAAAAAGCAATTTCTTTTGACTTTGACCGTGGTGCTCACCGTACTG  
GTGAATTACGTCGAGGTGCGGTTGTACAGGTTCAACAATGGAGTGATGTT  
GCAAACCTTACGCCGAGGACTTAGCACCTATAAAACCGTAGTCATTGA  
TACCGTGGGTGCAATGCTTGAATGCATTAACCCACCTGTTACTTACGG  
CAAATAACCGTCAAAAAGATGGTTCTTTAAAGTTAAAGGCTCAAGGATTAG  
CGAACCAACGTTCAAGCAATACATCAATACTTTGATCAGTTTAGGTAAG  
ACGTTGTTTTTATTGCACACGCTTCAGAAGATCAAAACGGTGATCAAATTA  
TTTACCGACCAGATCTAGGTGGTAAAAACCGTAACGAGCTTTACCGTATC  
GCAGATGTGATGGGTTATCTAACAACCTGTTACTACAGGTGAAGGTAATAA  
GCCGCGTTATTAATTTAAACCCTCGCCTACACATCATGCGAAAACTCA

group\_  
3193

hypothetical  
protein

L6, L7,  
L8

S

AAA domain

group\_3195

hypothetical protein

A3

S

AAA domain

GGTGCTTTAGGTGGTGAAACTGGTGAAGTATGGGTACCAGATCTTAAAGC  
ACATCCTACTTTCTTGGCTGACCTGATTACTCAAGCTAAAGATCACATTAA  
CACCTTAACGCCTGCACAACCTTGCAGCAGCTAAAGCCCAAGAAGAGCTAG  
AAAAGTGGAAACAAAGCTGTGAAGAAGCTGAGCATGCAGGTGACCTTAAT  
CAATTAAGTGAAGTCGCTTGATAAAGAACACATGTATTACCAGAACATGCGC  
CAAGCAATGTTAATGAGAGCTAAAGCATTGAATTGCACGTTTGATAAACAA  
CGTGGCACTTGGATTAGTCCACCAGAATTTAACGGTATCTCAGATCAACAA  
AGAGATGAACTTCAAACTTTATTGCTGAACGTGGCCTCGATGTAAAAACA  
GTTTGTGAGCACTTCGGCATAGATGCCCTGATCCAAATTGAAGCGGCAAA  
ACTAACTGCAGTTAAACAAGAAATTGAAACCTTAGCGAAAACGGGGATGA  
CAGCATGA

ATGGCTCTACCGATTACTGCTGACCAAACCTTTATTGGTTCAAGCAATT  
ATTGTGTACCTATACGCGGATCCGGGTTTAGGTAAATCATCGATGGGCTTT  
ACTGCGGAAAAAGCAATTTCTTTGACTTTGACCGTGGTGCTCACCGTACT  
GGTGAATTACGTCGTGGTGCAGTTGTACAGGTTCAACAATGGAGTGATGT  
TGCAAACCTTACTCCGCAGGACTTAGCACCATATAAACTGTTGTCATTGA  
TACCGTGGGTGCAATGCTTGAATGCATTAACCCACCTGTTACTTACGG  
CAAATAACCGTCAAAAAGATGGTTCTTTAAAGTTAAAGGCTCAAGGTTTAG  
CGAACCAAACGTTCAAGCAATACATCAATACTTTGATCAGTTTAGGTAAAG  
ATGTTGTTTTTCATTGCACACGCATCAGAAGATCAAAACGGTGATCAAATTA  
TTTACCGACCAGATCTAGGTGGTAAAAACCGTAACGAGCTTTACCGTATC  
GCAGATGTCATGGGTTATCTAACAACCTGTTACTACTGGTGAAGGTAAAAAT  
GCCCGCGTTATTAATTTCAAACCTTCGCCTACACATCATGCGAAAACTCA  
GGTGCTTTAGGCGGTGAAACCGGTGAAGTATGGGTACCTGATCTTAAAGC  
ACACCCTACTTTCTTGGCTGACCTGATTACTCAAGCTAAAGATCACATTAA  
CACCTTAACGCCTGCACAACCTTGCAGCAGCTAAAGCCCAAGAAGAGCTAG  
AAAAGTGGAAACAAAGCTGTGAGGAAGCAGAGCATGCAGGTGACCTTAAT  
CAATTAAGTGAAGTCGCTTGATAAAGAACACATGTATTACCAGAACATGCGT  
CAAGCAATGTTAATGAGGGCTAAAGCATTGAATTGCACGTTTGATAAGCAA  
CGTGGCACTTGGATTAGTCCACCAGAATTTAACGGTATCTCAGATCAACAA  
AGAGACGAACTTCAAACTTTATTGCTGAACGTGGCCTAGACGTAAAAACA  
GTATGTGAGCACTTAGGTATCGATGCCCTTATTCAAATTGAAGCAGCAAAA

|                   |                      |             |   |                      |                                                                                                                                                                                                                                                                                                                                                                                                                                                                                                                                                                                                                                                                                                                                                                                                                                                                                                                                                                                                                                                                                                                                                                                                                                                                                                                                                                                                                                                                                                                                                                                                                                                                                                                                                                                                                                                                                                                  |
|-------------------|----------------------|-------------|---|----------------------|------------------------------------------------------------------------------------------------------------------------------------------------------------------------------------------------------------------------------------------------------------------------------------------------------------------------------------------------------------------------------------------------------------------------------------------------------------------------------------------------------------------------------------------------------------------------------------------------------------------------------------------------------------------------------------------------------------------------------------------------------------------------------------------------------------------------------------------------------------------------------------------------------------------------------------------------------------------------------------------------------------------------------------------------------------------------------------------------------------------------------------------------------------------------------------------------------------------------------------------------------------------------------------------------------------------------------------------------------------------------------------------------------------------------------------------------------------------------------------------------------------------------------------------------------------------------------------------------------------------------------------------------------------------------------------------------------------------------------------------------------------------------------------------------------------------------------------------------------------------------------------------------------------------|
| <i>group_3226</i> | hypothetical protein | A2, A3, A14 | / | hypothetical protein | <p>CTTAAGGCAGTTAAACAAGACATTGAAACATTAGCTAAAACGGGGATGACAGCATGA</p> <p>ATGGAACCAGTTTCCACAAGCGGTTTAACAGCAATTTTAAAATTTTATGGA</p> <p>GCGGCAATCATGGTGACTTTAGCGGTTCGCTTTAGTTGCAGCAGTAGTATT</p> <p>AATGACACGTATGCCACGCTCACCACAAGAGTGGGCAGTGGGCTTGATCT</p> <p>GTACGGTTGTATCAAGTTTGGCTGGCGGCTCATTCAATTATTGTGAAGTGG</p> <p>GGGCTTCATGAATGGGTTACTGATGTATGGGGGATGATTGCTCTAGGTGG</p> <p>GTTCTTCTTTGTTTGTGGATTACCCGGTTGGGCTTTGGTCCGTTGGATTTT</p> <p>TAACTTCATAGATAAACAGGAAGGTAAAACGATTGTGGAAGTGATCAAAGA</p> <p>GTTTAAGAAAGCCAGAAAAGACATTGAAAACAGTTAA</p> <p>ATGGAACCAGTTTCCACAAGCGGTTTAACAGCAATTTTAAAATTTTATGGA</p> <p>GCGGCAATCATGGTGACTTTAGCGGTTCGCTTTAGTTGCAGCAGTAGTATT</p> <p>AATGACACGTATGCCACGCTCACCACAAGAGTGGGCAGTGGGCTTGATCT</p> <p>GTACGGTTGTATCAAGTTTGGCTGGCGGCTCATTCAATTATTGTGAAGTGG</p> <p>GGGCTTCATGAATGGGTTACTGATGTATGGGGGATGATTGCTCTAGGTGG</p> <p>GTTCTTCTTTGTTTGTGGATTACCCGGTTGGGCTTTGGTCCGTTGGATTTT</p> <p>TAACTTCATAGATAAACAGGAAGGTAAAACGATTGTGGAAGTGATCAAAGA</p> <p>GTTTAAGAAAGCCAGAAAAGACATTGAAAACAGTTAA</p> <p>ATGAAACGTAAAAGCTCCTCCTTTCAACTCATTGTCATTTGTCAGCATGGCT</p> <p>GCTCTTGCAATCTCTGGTGGTCTTTAGTTGCTTGCCAATTGCAACCAGCT</p> <p>TTCCAAACAAAAGAAGCCCCTTCTCTATTTACCCCTAAGACTCAACCAAGT</p> <p>ACTTACGGGGTTTTAACCGCAAAAATCACAGGTAAACATTCTGGCGTTGCT</p> <p>GTAATTAATTAGATAGCTTCCGTTTAAACGTTAGCTTTGATTTTGAAGCTC</p> <p>ATCCAGACAGCTACGGCGTTCCGGGTTCTGAATTTACCGCTGTTGATATTA</p> <p>CTCAACTCACGGTAAATGAAATTAAGTACATTAACGGTAAGTCATATAACG</p> <p>ATTTACCGAATTTGAAGACATCCGCAACATCAATGACCTTCTAAAAGGCT</p> <p>TCATCGAACGTAACAAGTTGGTGGAGGCTTAA</p> <p>ATGGGGTTCCCTATAGATGAAGGTGTTCTAGGATTTCAAAAATATTACGAT</p> <p>GCTGCTGCCGTAAGCCCAGCATACAAAATCTTTAGATTAAAAACGAGAAGTT</p> <p>AATGTAGAATATTTGGATTTGATTTGAGATCTAATTCTCTAAGAAAATAT</p> <p>ACAAAAGTAAAATGCAAGGCAGTGTAGAGAGACGACGCAGTATTCCTGAT</p> <p>GAAATGTTTTTGAATATTGAGATCCCGAATCCTCCTGAAGAGGTTAAAGAT</p> <p>CAAATAGTAAAACAACATAAACTAATAAAGGAAATTGAGAATAGTCTCAAG</p> |
| <i>group_3228</i> | hypothetical protein | A2, A3, A14 | / | hypothetical protein | <p>ATGAAACGTAAAAGCTCCTCCTTTCAACTCATTGTCATTTGTCAGCATGGCT</p> <p>GCTCTTGCAATCTCTGGTGGTCTTTAGTTGCTTGCCAATTGCAACCAGCT</p> <p>TTCCAAACAAAAGAAGCCCCTTCTCTATTTACCCCTAAGACTCAACCAAGT</p> <p>ACTTACGGGGTTTTAACCGCAAAAATCACAGGTAAACATTCTGGCGTTGCT</p> <p>GTAATTAATTAGATAGCTTCCGTTTAAACGTTAGCTTTGATTTTGAAGCTC</p> <p>ATCCAGACAGCTACGGCGTTCCGGGTTCTGAATTTACCGCTGTTGATATTA</p> <p>CTCAACTCACGGTAAATGAAATTAAGTACATTAACGGTAAGTCATATAACG</p> <p>ATTTACCGAATTTGAAGACATCCGCAACATCAATGACCTTCTAAAAGGCT</p> <p>TCATCGAACGTAACAAGTTGGTGGAGGCTTAA</p> <p>ATGGGGTTCCCTATAGATGAAGGTGTTCTAGGATTTCAAAAATATTACGAT</p> <p>GCTGCTGCCGTAAGCCCAGCATACAAAATCTTTAGATTAAAAACGAGAAGTT</p> <p>AATGTAGAATATTTGGATTTGATTTGAGATCTAATTCTCTAAGAAAATAT</p> <p>ACAAAAGTAAAATGCAAGGCAGTGTAGAGAGACGACGCAGTATTCCTGAT</p> <p>GAAATGTTTTTGAATATTGAGATCCCGAATCCTCCTGAAGAGGTTAAAGAT</p> <p>CAAATAGTAAAACAACATAAACTAATAAAGGAAATTGAGAATAGTCTCAAG</p>                                                                                                                                                                                                                                                                                                                                                                                                                                                                                                                                                                                                                                                                                                                                                                                                                                                                                                                                                                                                                  |
| <i>group_323</i>  | hypothetical protein | A3          | / | hypothetical protein | <p>ATGAAACGTAAAAGCTCCTCCTTTCAACTCATTGTCATTTGTCAGCATGGCT</p> <p>GCTCTTGCAATCTCTGGTGGTCTTTAGTTGCTTGCCAATTGCAACCAGCT</p> <p>TTCCAAACAAAAGAAGCCCCTTCTCTATTTACCCCTAAGACTCAACCAAGT</p> <p>ACTTACGGGGTTTTAACCGCAAAAATCACAGGTAAACATTCTGGCGTTGCT</p> <p>GTAATTAATTAGATAGCTTCCGTTTAAACGTTAGCTTTGATTTTGAAGCTC</p> <p>ATCCAGACAGCTACGGCGTTCCGGGTTCTGAATTTACCGCTGTTGATATTA</p> <p>CTCAACTCACGGTAAATGAAATTAAGTACATTAACGGTAAGTCATATAACG</p> <p>ATTTACCGAATTTGAAGACATCCGCAACATCAATGACCTTCTAAAAGGCT</p> <p>TCATCGAACGTAACAAGTTGGTGGAGGCTTAA</p> <p>ATGGGGTTCCCTATAGATGAAGGTGTTCTAGGATTTCAAAAATATTACGAT</p> <p>GCTGCTGCCGTAAGCCCAGCATACAAAATCTTTAGATTAAAAACGAGAAGTT</p> <p>AATGTAGAATATTTGGATTTGATTTGAGATCTAATTCTCTAAGAAAATAT</p> <p>ACAAAAGTAAAATGCAAGGCAGTGTAGAGAGACGACGCAGTATTCCTGAT</p> <p>GAAATGTTTTTGAATATTGAGATCCCGAATCCTCCTGAAGAGGTTAAAGAT</p> <p>CAAATAGTAAAACAACATAAACTAATAAAGGAAATTGAGAATAGTCTCAAG</p>                                                                                                                                                                                                                                                                                                                                                                                                                                                                                                                                                                                                                                                                                                                                                                                                                                                                                                                                                                                                                  |
| <i>group_324</i>  | hypothetical protein | A2, A3      | V | N-6 DNA Methylase    | <p>ATGAAACGTAAAAGCTCCTCCTTTCAACTCATTGTCATTTGTCAGCATGGCT</p> <p>GCTCTTGCAATCTCTGGTGGTCTTTAGTTGCTTGCCAATTGCAACCAGCT</p> <p>TTCCAAACAAAAGAAGCCCCTTCTCTATTTACCCCTAAGACTCAACCAAGT</p> <p>ACTTACGGGGTTTTAACCGCAAAAATCACAGGTAAACATTCTGGCGTTGCT</p> <p>GTAATTAATTAGATAGCTTCCGTTTAAACGTTAGCTTTGATTTTGAAGCTC</p> <p>ATCCAGACAGCTACGGCGTTCCGGGTTCTGAATTTACCGCTGTTGATATTA</p> <p>CTCAACTCACGGTAAATGAAATTAAGTACATTAACGGTAAGTCATATAACG</p> <p>ATTTACCGAATTTGAAGACATCCGCAACATCAATGACCTTCTAAAAGGCT</p> <p>TCATCGAACGTAACAAGTTGGTGGAGGCTTAA</p> <p>ATGGGGTTCCCTATAGATGAAGGTGTTCTAGGATTTCAAAAATATTACGAT</p> <p>GCTGCTGCCGTAAGCCCAGCATACAAAATCTTTAGATTAAAAACGAGAAGTT</p> <p>AATGTAGAATATTTGGATTTGATTTGAGATCTAATTCTCTAAGAAAATAT</p> <p>ACAAAAGTAAAATGCAAGGCAGTGTAGAGAGACGACGCAGTATTCCTGAT</p> <p>GAAATGTTTTTGAATATTGAGATCCCGAATCCTCCTGAAGAGGTTAAAGAT</p> <p>CAAATAGTAAAACAACATAAACTAATAAAGGAAATTGAGAATAGTCTCAAG</p>                                                                                                                                                                                                                                                                                                                                                                                                                                                                                                                                                                                                                                                                                                                                                                                                                                                                                                                                                                                                                  |



group\_  
325

hypoth  
etical  
protein

A2, A14

V

N-6 DNA Methylase

GAAAATCAAAAAAATTGCGTCTAAAGACAGAAGCATTATGGGAACCTTCCT  
CAAAATTACAATAA  
ATGTCTAATATTGAGCAAGATACACGTTTTATTGTTAACAATAATTTGATTA  
ACAAGGGCTGGATCTTGGACATTCAAGATCCAAACAAAAATGTCTTTTTT  
AATCAGATATCTTAAGAATTGTTAATAATGAGTTTCTCAAGAAAAGTAAAA  
AAGACCCGATTATGTTCTTTTCGATTCCAAAATAAGCGGCCAATCGGTGT  
AATTGAAACGAAATCAGGTGGAAAAAGCTTAACAAAAGCACTGGATCAGG  
CAACCGAATATGCTGAAATGCTTGATGCACCTTTGATATTTGCAATGAATA  
ATGGTTTCTGCGAAACACGGCATTGTATACCCAAAAACCATTATTTATTG  
ATGAAAATGAGGTTAATGAATTAATAAGAGTAAATGAAGCTAAAGAGTTCA  
TATTGCAGGAAACAAATGGTATTTATATTACACCTAAAGAAATTTTAGTCTC  
TCGCAAAGAGTTAATTAATGTTTTCAAGAAGTTAATAACTCACTAAGAGGT  
GAAGGTTTAAGAGCTGGTATAGAAAGGCTTTCAGAATTTGCAAACATTCTT  
TTTTTAAATTGTATACAGAGAATGCTAATACAGGTATTTGGAATTCTCTCA  
AAAGTCTCGATAATGATTTGCTAATTAATACAATAACATACTACAAGA  
TATTGATAGACAATATGGTGCTTCTGTTTTTACAAATTTACAGCTAACCAAC  
CCTGTTGCTGTTAAAGAGATGATCAAAGAGTTGGATAAGTTAAAACCTCTCA  
TCAATAGATACCGATATTAAGGAGATGCTTTTGAGTATTTCTTACAGCAA  
GCTACAGCAACTAATAATGACTTAGGAGAATATTTACTCCACGTCACATA  
ACTAAAACCATTGTTAACTTAGTCAACCCTAAATATGGTGAAAAGATCTATG  
ACCCTTTTTGTGGGACAGGTGGTTTTTTAACAGAGGCATTTGATCATATAA  
AAGATAACACTTTAATTGCAAACAATAGTAGTGAAGAAATCAAGCTTAAAC  
ATAATACTATTTTTGGAAGAGAAATTACCTCAAATGCAAAACTCGCAAAAAT  
GAATATGATTCTGCATGGGGATGGGCATAGTGGAAATTTGCCAGATAGACA  
CACTTCAAACCCTATTGAATCTGAATATGATGTGGTTATAACCAACATGC  
CATTTTCTCAAAAAACTTCTTATTCTCACTTATATGAGAATAAGTTAGCTAA  
AAACGATGGTGATGGAGTATGTGTTCTACATTGCTTTAAAGCAACAAAAAA  
AGGAGGGCGAATGGCATTAGTAGTACCTGAAGGCTTTCTTTTTAAAGCCG  
CTTTAGCTCCAGTAAGGAAGTATTTATTTGAAAACGCCCAACTAAAAGCAG  
TAGTTTCACTTCCAAAAGAAGTTTTTCTGCCATATGCAAAAAGTTAAACCAA  
TATACTCTACTTTACCAACTGTCATAATGGTAGAACAAATTCTGACGTTTTT  
TACTACAATGTGACAAATGATGGCCTAAGTTTAGATTCTTTCCGTAGAAAA  
ATTGACGAAAATGATTTAAAAAATTTAGATTTTGCTGATTTAATAAGAGCG

group\_  
326

hypothetical  
protein

A1, A3,  
A14

V

N-6 DNA Methylase

group\_  
327

hypothetical  
protein

A2, A3,  
A14

/

hypothetical protein

group\_  
3271

IS4  
family  
transposase  
ISAb  
33

A2, A3,  
A14

L

Transposase DDE domain

ACTTTGATAAATATTATAATGAATTAGGTTTCTTAAAAGTTAATCCAGAATTA  
ATCAGAAGCAATGATTATATTTATAATTATGCTCACTATAGTAATTCACATA  
TAAAATCAAATTCCTCAACTATAAACTAAAAGAACTCCTATCCTTGTCTGG  
CAAAGTCAAAGTGGGAGAGGATACAAATATACCTATTATGAGTATCACTAT  
GGAACATGGCTTAATTGATCAGCATGAGAAATTTAAAAACGAGTCGCAAG  
TTCTGATATTTCTGGGTATAAAAAGATTTTTAAAATGAACTTGTAAATGGGG  
TTCCCTATAGATGAAGGTGTTCTAGGATTTCAAAAATATTACGATGCTGCT  
GCCGTAAGCCCAGCATACAAATCTTTAGATTA AAAACGAGAAGTTAATGTA  
GAATATTTGGATTTGATTTGAGATCTAATTCTCTAAGAAAAATATACAAA  
GTAAAATGCAAGGCAGTGTAGAGAGACGACGCAGTATTCCTGATGAAATG  
TTTTTGAATATTGAGATCCCGAATCCTCCTGAAGAGGTTAAAGATCAAATA  
GTAAAACAACATAAACTAATAAAGGAAATTGAGAATAGTCTCAAGGAAAT  
CAAAAAAATTGCGTCTAAAGACAGAAGCATTATGGGAACTTCCTCAAAAT  
TACA ACTAA  
ATGGGGTTCCCTATAGATGAAGGTGTTCTAGGATTTCAAAAATATTACGAT  
GCTGCTGCCGTAAGCCCAGCATACAAATCTTTAGATTA AAAACGAGAAGTT  
AATGTAGAATATTTGGATTTGATTTGAGATCTAATTCTCTAAGAAAAATAT  
ACAAAAGTAAAATGCAAGGCAGTGTAGAGAGACGACGCAGTATTCCTGAT  
GAAATGTTTTTGAATATTGAGATCCCGAATCCTCCTGAAGAGGTTAAAGAT  
CAAATAGTAAAACAACATAAACTAATAAAGGAAATTGAGAATAGTCTCAAG  
GAAAATCAAAAAAATTGCGTCTAAAGACAGAAGCATTATGGGAACTTCCT  
CAAAATTACA ACTAA  
ATGGACA ACTCTAAACTACCAATCAACCAGATTATTGCTCGCATCAATGAT  
GCTGCGAAACATGGTGAAGCTTTGGTGCTAACCCTGGAAGAAGTAAAGAT  
TCTTTCTAAAGATATTGGCGACAAAGTCTTTATTCCTGTGCTTACTAATGAG  
CAGGTCGTGCAGTTGGTAAAAGAAGGAAAGCTAGGCCAGAAAATTAATAA  
CACAAAAGATTAA  
ATGACACATCTCAATGAGTTATATCTTATCTTAAACAAATATCTAAAATGGA  
ACAAGTCACATTTAAAGTGCTTTGCGCTCATCATGCTTGTGATTATTTAAA  
GCAAACATGTAATCTTTCTTCTGCATCTAAAGCCTTGCCCATCAAGTGCTT  
ACCACAATCATTTTATCGACGTATGCAGCGCTTCTTTGCAGGTCAGTATTT  
TGATTATCGTCAAATTTCTCAGTTGATTTTCAATATGTTTTATTTCGACCAA  
GTGCAACTGACTTTAGATAGAACCAATTGGAATGGGGAAAACGAAATATT



|                       |                                                |                |   |                        |  |                                                                                                                                                                                                                                                                                                                                                                                                                                                                                                                                                                                                                                       |
|-----------------------|------------------------------------------------|----------------|---|------------------------|--|---------------------------------------------------------------------------------------------------------------------------------------------------------------------------------------------------------------------------------------------------------------------------------------------------------------------------------------------------------------------------------------------------------------------------------------------------------------------------------------------------------------------------------------------------------------------------------------------------------------------------------------|
|                       | osase                                          |                |   |                        |  | ACCACAATCATTTTATCGACGTATGCAGCGCTTCTTTGCAGGTCAGTATTT<br>TGATTATCGTCAAATTTCTCAGTTGATTTTCAATATGTTTTATTTCGACCAA<br>GTGCAACTGACTTTAGATAGAACCAATTGGAAATGGGGAAAACGAAATATT<br>AATATCCTGATGCTCGCAATCGTTTATCGTGGAATAGCGATACCTATCCTT<br>TGGACATTGCTTAATAAACGTGGAAATTCAGATACGAAAGAGCGCATTGCT<br>TTGATTCAACGCTTTATAGCCATTTTTGGTAAAGACCGTATTGTGAATGTGT<br>TCGCAGACAGAGAGTTTATCGGTGAGCAGTGGTTTACATGGTTAATTGAA<br>CAAGACATCAACTTCTGCATTCGTGTTAAAAAACTTCATTGTCACCAATCA<br>TTTAG                                                                                                                                                                        |
|                       | ISAb                                           |                |   |                        |  | ATGACACATCTCAATGAGTTATATCTTATCTTAAACAAATATCTAAAATGGA<br>ACAAGTCACATTTAAAGTGCTTTGCGCTCATCATGCTTGTGATTATTTTAAA<br>GCAAACATGTAATCTTTCTTCTGCATCTAAAGCCTTGCCCATCAAGTGCTT<br>ACCACAATCATTTTATCGACGTATGCAGCGCTTCTTTGCAGGTCAGTATTT<br>TGATTATCGTCAAATTTCTCAGTTGATTTTCAATATGTTTTATTTCGACCAA<br>GTGCAACTGACTTTAGATAGAACCAATTGGAAATGGGGAAAACGAAATATT<br>AATATCCTGATGCTCGCAATCGTTTATCGTGGAATAGCGATACCTATCCTT<br>TGGACATTGCTTAATAAACGTGGAAATTCAGATACGAAAGAGCGTATTGCT<br>TTGATTCAACGCTTTATAGCCATTTTTGGTAAAGACCGTATTGTGAATGTGT<br>TCGCAGACAGAGAGTTTATCGGTGAGCAGTGGTTTACATGGTTAATTGAA<br>CAAGACATCAACTTCTGCATTCGTGTTAAAAAACTTCATTGTCACCAATCA<br>TTTAG |
|                       | 33                                             |                |   |                        |  |                                                                                                                                                                                                                                                                                                                                                                                                                                                                                                                                                                                                                                       |
| <i>group_</i><br>3275 | IS4<br>family<br>transp<br>osase<br>ISAb<br>33 | A2, A3,<br>A14 | L | Transposase DDE domain |  | ACCACAATCATTTTATCGACGTATGCAGCGCTTCTTTGCAGGTCAGTATTT<br>TGATTATCGTCAAATTTCTCAGTTGATTTTCAATATGTTTTATTTCGACCAA<br>GTGCAACTGACTTTAGATAGAACCAATTGGAAATGGGGAAAACGAAATATT<br>AATATCCTGATGCTCGCAATCGTTTATCGTGGAATAGCGATACCTATCCTT<br>TGGACATTGCTTAATAAACGTGGAAATTCAGATACGAAAGAGCGTATTGCT<br>TTGATTCAACGCTTTATAGCCATTTTTGGTAAAGACCGTATTGTGAATGTGT<br>TCGCAGACAGAGAGTTTATCGGTGAGCAGTGGTTTACATGGTTAATTGAA<br>CAAGACATCAACTTCTGCATTCGTGTTAAAAAACTTCATTGTCACCAATCA<br>TTTAG                                                                                                                                                                        |
| <i>group_</i><br>3276 | IS4<br>family<br>transp<br>osase<br>ISAb<br>33 | A2, A3,<br>A14 | L | Transposase DDE domain |  | ATGACACATCTCAATGAGTTATATCTTATCTTAAACAAATATCTAAAATGGA<br>ACAAGTCACATTTAAAGTGCTTTGCGCTCATCATGCTTGTGATTATTTTAAA<br>GCAAACATGTAATCTTTCTTCTGCATCTAAAGCCTTGCCCATCAAGTGCTT<br>ACCACAATCATTTTATCGACGTATGCAGCGCTTCTTTGCAGGTCAGTATTT<br>TGATTATCGTCAAATTTCTCAGTTGATTTTCAATATGTTTTATTTCGACCAA<br>GTGCAACTGACTTTAGATAGAACCAATTGGAAATGGGGAAAACGAAATATT<br>AATATCCTGATGCTCGCAATCGTTTATCGTGGAATAGCGATACCTATCCTT<br>TGGACATTGCTTAATAAACGTGGAAATTCAGATACGAAAGAGCGTATTGCT<br>TTGATTCAACGCTTTATAGCCATTTTTGGTAAAGACCGTATTGTGAATGTGT<br>TCGCAGACAGAGAGTTTATCGGTGAGCAGTGGTTTACATGGTTAATTGAA<br>CAAGACATCAACTTCTGCATTCGTGTTAAAAAACTTCATTGTCACCAATCA<br>TTTAG |



|                   |                                            |                |   |                        |                                                                                                                                                                                                                                                                                                                                                                                                                                                                                                                                                                                                                                                                                                                                                                                                                                                                                                                                                                                                                                                                                                                                                                                                                                                                                                                                                                                                |
|-------------------|--------------------------------------------|----------------|---|------------------------|------------------------------------------------------------------------------------------------------------------------------------------------------------------------------------------------------------------------------------------------------------------------------------------------------------------------------------------------------------------------------------------------------------------------------------------------------------------------------------------------------------------------------------------------------------------------------------------------------------------------------------------------------------------------------------------------------------------------------------------------------------------------------------------------------------------------------------------------------------------------------------------------------------------------------------------------------------------------------------------------------------------------------------------------------------------------------------------------------------------------------------------------------------------------------------------------------------------------------------------------------------------------------------------------------------------------------------------------------------------------------------------------|
| <i>group_3280</i> | IS4<br>family<br>transposase<br>ISAb<br>33 | A2, A3,<br>A14 | L | Transposase DDE domain | TCGCAGACAGAGAGTTTATCGGTGAGCAGTGGTTTACATGGTTAATTGAA<br>CAAGACATCAACTTCTGCATTCGTGTTAAAAAACTTCATTGTCACCAATCA<br>TTTAG<br>ATGACACATCTCAATGAGTTATATCTTATCTTAAACAAATATCTAAAATGGA<br>ACAAGTCACATTTAAAGTGCTTTGCGCTCATCATGCTTGTGATTATTTAAA<br>GCAAACATGTAATCTTTCTTCTGCATCTAAAGCCTTGCCCATCAAGTGCTT<br>ACCACAATCATTTTATCGACGTATGCAGCGCTTCTTTGCAGGTCAGTATTT<br>TGATTATCGTCAAATTTCTCAGTTGATTTTCAATATGTTTTCATTGACCAA<br>GTGCAACTGACTTTAGATAGAACCAATTGGAAATGGGGAAAACGAAATATT<br>AATATCCTGATGCTCGCAATCGTTTATCGTGGAATAGCGATACCTATCCTT<br>TGGACATTGCTTAATAAACGTGGAAATTCAGATACGAAAGAGCGTATTGCT<br>TTGATTCAACGCTTTATAGCCATTTTGGTAAAGACCGTATTGTGAATGTGT<br>TCGCAGACAGAGAGTTTATCGGTGAGCAGTGGTTTACATGGTTAATTGAA<br>CAAGACATCAACTTCTGCATTCGTGTTAAAAAACTTCATTGTCACCAATCA<br>TTTAG<br>ATGACACATCTCAATGAGTTATATCTTATCTTAAACAAATATCTAAAATGGA<br>ACAAGTCACATTTAAAGTGCTTTGCGCTCATCATGCTTGTGATTATTTAAA<br>GCAAACATGTAATCTTTCTTCTGCATCTAAAGCCTTGCCCATCAAGTGCTT<br>ACCACAATCATTTTATCGACGTATGCAGCGCTTCTTTGCAGGTCAGTATTT<br>TGATTATCGTCAAATTTCTCAGTTGATTTTCAATATGTTTTCATTGACCAA<br>GTGCAACTGACTTTAGATAGAACCAATTGGAAATGGGGAAAACGAAATATT<br>AATATCCTGATGCTCGCAATCGTTTATCGTGGAATAGCGATACCTATCCTT<br>TGGACATTGCTTAATAAACGTGGAAATTCAGATACGAAAGAGCGTATTGCT<br>TTGATTCAACGCTTTATAGCCATTTTGGTAAAGACCGTATTGTGAATGTGT<br>TCGCAGACAGAGAGTTTATCGGTGAGCAGTGGTTTACATGGTTAATTGAA<br>CAAGACATCAACTTCTGCATTCGTGTTAAAAAACTTCATTGTCACCAATCA<br>TTTAG |
| <i>group_3281</i> | IS4<br>family<br>transposase<br>ISAb<br>33 | A2, A3,<br>A14 | L | Transposase DDE domain | TCGCAGACAGAGAGTTTATCGGTGAGCAGTGGTTTACATGGTTAATTGAA<br>CAAGACATCAACTTCTGCATTCGTGTTAAAAAACTTCATTGTCACCAATCA<br>TTTAG<br>ATGACACATCTCAATGAGTTATATCTTATCTTAAACAAATATCTAAAATGGA<br>ACAAGTCACATTTAAAGTGCTTTGCGCTCATCATGCTTGTGATTATTTAAA<br>GCAAACATGTAATCTTTCTTCTGCATCTAAAGCCTTGCCCATCAAGTGCTT<br>ACCACAATCATTTTATCGACGTATGCAGCGCTTCTTTGCAGGTCAGTATTT<br>TGATTATCGTCAAATTTCTCAGTTGATTTTCAATATGTTTTCATTGACCAA<br>GTGCAACTGACTTTAGATAGAACCAATTGGAAATGGGGAAAACGAAATATT<br>AATATCCTGATGCTCGCAATCGTTTATCGTGGAATAGCGATACCTATCCTT<br>TGGACATTGCTTAATAAACGTGGAAATTCAGATACGAAAGAGCGTATTGCT<br>TTGATTCAACGCTTTATAGCCATTTTGGTAAAGACCGTATTGTGAATGTGT<br>TCGCAGACAGAGAGTTTATCGGTGAGCAGTGGTTTACATGGTTAATTGAA<br>CAAGACATCAACTTCTGCATTCGTGTTAAAAAACTTCATTGTCACCAATCA<br>TTTAG<br>ATGACACATCTCAATGAGTTATATCTTATCTTAAACAAATCTCTAAAATGGA<br>ACAAGTCACATTTAAAGTGCTTTGCGCTCATCATGCTTGTGATTATTTAAA<br>GCAAACATGTAATCTTTCTTCTGCATCTAAAGCCTTGCCCATCAAGTGCTT<br>ACCACAATCATTTTATCGACGTATGCAGCGCTTCTTTGCAGGTCAGTATTT<br>TGATTATCGTCAAATTTCTCAGTTGATTTTCAATATGTTTTCATTGACCAA<br>GTGCAACTGACTTTAGATAGAACCAATTGGAAATGGGGAAAACGAAATATT                                                                                                                                                                                                                                                                                            |
| <i>group_3282</i> | IS4<br>family<br>transposase<br>ISAb<br>33 | A2, A3,<br>A14 | L | Transposase DDE domain | TCGCAGACAGAGAGTTTATCGGTGAGCAGTGGTTTACATGGTTAATTGAA<br>CAAGACATCAACTTCTGCATTCGTGTTAAAAAACTTCATTGTCACCAATCA<br>TTTAG<br>ATGACACATCTCAATGAGTTATATCTTATCTTAAACAAATCTCTAAAATGGA<br>ACAAGTCACATTTAAAGTGCTTTGCGCTCATCATGCTTGTGATTATTTAAA<br>GCAAACATGTAATCTTTCTTCTGCATCTAAAGCCTTGCCCATCAAGTGCTT<br>ACCACAATCATTTTATCGACGTATGCAGCGCTTCTTTGCAGGTCAGTATTT<br>TGATTATCGTCAAATTTCTCAGTTGATTTTCAATATGTTTTCATTGACCAA<br>GTGCAACTGACTTTAGATAGAACCAATTGGAAATGGGGAAAACGAAATATT                                                                                                                                                                                                                                                                                                                                                                                                                                                                                                                                                                                                                                                                                                                                                                                                                                                                                                                                  |

|                   |                                            |                |   |                        |                                                                                                                                                                                                                                                                                                                                                                                                                                                                                                                                                                                                                                                                                                                                                                                                                                                                                                                                                                                                                                                                                                                                                                                                                                                                                                                                                                                                                                                                                                                                                                                                                  |
|-------------------|--------------------------------------------|----------------|---|------------------------|------------------------------------------------------------------------------------------------------------------------------------------------------------------------------------------------------------------------------------------------------------------------------------------------------------------------------------------------------------------------------------------------------------------------------------------------------------------------------------------------------------------------------------------------------------------------------------------------------------------------------------------------------------------------------------------------------------------------------------------------------------------------------------------------------------------------------------------------------------------------------------------------------------------------------------------------------------------------------------------------------------------------------------------------------------------------------------------------------------------------------------------------------------------------------------------------------------------------------------------------------------------------------------------------------------------------------------------------------------------------------------------------------------------------------------------------------------------------------------------------------------------------------------------------------------------------------------------------------------------|
| <i>group_3283</i> | IS4<br>family<br>transposase<br>ISAb<br>33 | A2, A3,<br>A14 | L | Transposase DDE domain | <p>AATATCCTGATGCTCGCAATCGTTTATCGTGGAATAGCGATACCTATCCTT<br/>TGGACATTGCTTAATAAACGTGGAAATTCAGATACGAAAGAGCGCATTGCT<br/>TTGATTCAACGCTTTATAGCCATTTTTGGTAAAGACCGTATTGTGAATGTGT<br/>TCGCAGACAGAGAGTTTATCGGTGAGCAGTGGTTTACATGGTTAATTGAA<br/>CAAGACATCAACTTCTGCATTCGTGTTAAAAAACTTCATTGTCACCAATCA<br/>TTTAG</p> <p>ATGACACATCTCAATGAGTTATATCTTATCTTAAACAAATATCTAAAATGGA<br/>ACAAGTCACATTTAAAGTGCTTTGCGCTCATCATGCTTGTGATTATTTAAA<br/>GCAAACATGTAATCTTTCTTCTGCATCTAAAGCCTTGCCCATCAAGTGCTT<br/>ACCACAATCATTTTATCGACGTATGCAGCGCTTCTTTGCAGGTCAGTATTT<br/>TGATTATCGTCAAATTTCTCAGTTGATTTTCAATATGTTTTCATTGACCAA<br/>GTGCAACTGACTTTAGATAGAACCAATTGGAAATGGGGAAAACGAAATATT<br/>AATATCCTGATGCTCGCAATCGTTTATCGTGGAATAGCGATACCTATCCTT<br/>TGGACATTGCTTAATAAACGTGGAAATTCAGATACGAAAGAGCGTATTGCT<br/>TTGATTCAACGCTTTATAGCCATTTTTGGTAAAGACCGTATTGTGAATGTGT<br/>TCGCAGACAGAGAGTTTATCGGTGAGCAGTGGTTTACATGGTTAATTGAA<br/>CAAGACATCAACTTCTGCATTCGTGTTAAAAAACTTCATTGTCACCAATCA<br/>TTTAG</p> <p>ATGACACATCTCAATGAGTTATATCTTATCTTAAACAAATATCTAAAATGGA<br/>ACAAGTCACATTTAAAGTGCTTTGCGCTCATCATGCTTGTGATTATTTAAA<br/>GCAAACATGTAATCTTTCTTCTGCATCTAAAGCCTTGCCCATCAAGTGCTT<br/>ACCACAATCATTTTATCGACGTATGCAGCGCTTCTTTGCAGGTCAGTATTT<br/>TGATTATCGTCAAATTTCTCAGTTGATTTTCAATATGTTTTCATTGACCAA<br/>GTGCAACTGACTTTAGATAGAACCAATTGGAAATGGGGAAAACGAAATATT<br/>AATATCCTGATGCTCGCAATCGTTTATCGTGGAATAGCGATACCTATCCTT<br/>TGGACATTGCTTAATAAACGTGGAAATTCAGATACGAAAGAGCGTATTGCT<br/>TTGATTCAACGCTTTATAGCCATTTTTGGTAAAGACCGTATTGTGAATGTGT<br/>TCGCAGACAGAGAGTTTATCGGTGAGCAGTGGTTTACATGGTTAATTGAA<br/>CAAGACATCAACTTCTGCATTCGTGTTAAAAAACTTCATTGTCACCAATCA<br/>TTTAG</p> |
| <i>group_3284</i> | IS4<br>family<br>transposase<br>ISAb<br>33 | A2, A3,<br>A14 | L | Transposase DDE domain | <p>AATATCCTGATGCTCGCAATCGTTTATCGTGGAATAGCGATACCTATCCTT<br/>TGGACATTGCTTAATAAACGTGGAAATTCAGATACGAAAGAGCGCATTGCT<br/>TTGATTCAACGCTTTATAGCCATTTTTGGTAAAGACCGTATTGTGAATGTGT<br/>TCGCAGACAGAGAGTTTATCGGTGAGCAGTGGTTTACATGGTTAATTGAA<br/>CAAGACATCAACTTCTGCATTCGTGTTAAAAAACTTCATTGTCACCAATCA<br/>TTTAG</p> <p>ATGACACATCTCAATGAGTTATATCTTATCTTAAACAAATATCTAAAATGGA<br/>ACAAGTCACATTTAAAGTGCTTTGCGCTCATCATGCTTGTGATTATTTAAA<br/>GCAAACATGTAATCTTTCTTCTGCATCTAAAGCCTTGCCCATCAAGTGCTT<br/>ACCACAATCATTTTATCGACGTATGCAGCGCTTCTTTGCAGGTCAGTATTT<br/>TGATTATCGTCAAATTTCTCAGTTGATTTTCAATATGTTTTCATTGACCAA<br/>GTGCAACTGACTTTAGATAGAACCAATTGGAAATGGGGAAAACGAAATATT<br/>AATATCCTGATGCTCGCAATCGTTTATCGTGGAATAGCGATACCTATCCTT<br/>TGGACATTGCTTAATAAACGTGGAAATTCAGATACGAAAGAGCGTATTGCT<br/>TTGATTCAACGCTTTATAGCCATTTTTGGTAAAGACCGTATTGTGAATGTGT<br/>TCGCAGACAGAGAGTTTATCGGTGAGCAGTGGTTTACATGGTTAATTGAA<br/>CAAGACATCAACTTCTGCATTCGTGTTAAAAAACTTCATTGTCACCAATCA<br/>TTTAG</p>                                                                                                                                                                                                                                                                                                                                                                                                                                                                                                                                                                                                                                                       |
| <i>group_3285</i> | IS4<br>family<br>transposase               | A2, A3,<br>A14 | L | Transposase DDE domain | <p>ATGACACATCTCAATGAGTTATATCTTATCTTAAACAAATATCTAAAATGGA<br/>ACAAGTCACATTTAAAGTGCTTTGCGCTCATCATGCTTGTGATTATTTAAA<br/>GCAAACATGTAATCTTTCTTCTGCATCTAAAGCCTTGCCCATCAAGTGCTT</p>                                                                                                                                                                                                                                                                                                                                                                                                                                                                                                                                                                                                                                                                                                                                                                                                                                                                                                                                                                                                                                                                                                                                                                                                                                                                                                                                                                                                                                      |

|                       |                                                |                |   |                        |  |                                                                                                                                                                                                                                                                                                                                                                                                                                                                                                                                                                                                                                                                                                                                                                                                                                                                                                                                                                                                                                                                                                                                                                                                                                                                                                                                                                                                                                                                                                                                                                                                                                                                                                                                                |
|-----------------------|------------------------------------------------|----------------|---|------------------------|--|------------------------------------------------------------------------------------------------------------------------------------------------------------------------------------------------------------------------------------------------------------------------------------------------------------------------------------------------------------------------------------------------------------------------------------------------------------------------------------------------------------------------------------------------------------------------------------------------------------------------------------------------------------------------------------------------------------------------------------------------------------------------------------------------------------------------------------------------------------------------------------------------------------------------------------------------------------------------------------------------------------------------------------------------------------------------------------------------------------------------------------------------------------------------------------------------------------------------------------------------------------------------------------------------------------------------------------------------------------------------------------------------------------------------------------------------------------------------------------------------------------------------------------------------------------------------------------------------------------------------------------------------------------------------------------------------------------------------------------------------|
|                       | osase                                          |                |   |                        |  | ACCACAATCATTTTATCGACGTATGCAGCGCTTCTTTGCAGGTCAGTATTT<br>TGATTATCGTCAAATTTCTCAGTTGATTTTCAATATGTTTTATTTCGACCAA<br>GTGCAACTGACTTTAGATAGAACCAATTGGAAATGGGGAAAACGAAATATT<br>AATATCCTGATGCTCGCAATCGTTTATCGTGGAATAGCGATACCTATCCTT<br>TGGACATTGCTTAATAAACGTGGAAATTCAGATACGAAAGAGCGTATTGCT<br>TTGATTCAACGCTTTATAGCCATTTTTGGTAAAGACCGTATTGTGAATGTGT<br>TCGCAGACAGAGAGTTTATCGGTGAGCAGTGGTTTACATGGTTAATTGAA<br>CAAGACATCAACTTCTGCATTCGTGTTAAAAAACTTCATTGTCACCAATCA<br>TTTAG<br>ATGACACATCTCAATGAGTTATATCTTATCTTAAACAAATATCTAAAATGGA<br>ACAAGTCACATTTAAAGTGCTTTGCGCTCATCATGCTTGTGATTATTTAAA<br>GCAAACATGTAATCTTTCTTCTGCATCTAAAGCCTTGCCCATCAAGTGCTT<br>ACCACAATCATTTTATCGACGTATGCAGCGCTTCTTTGCAGGTCAGTATTT<br>TGATTATCGTCAAATTTCTCAGTTGATTTTCAATATGTTTTATTTCGACCAA<br>GTGCAACTGACTTTAGATAGAACCAATTGGAAATGGGGAAAACGAAATATT<br>AATATCCTGATGCTCGCAATCGTTTATCGTGGAATAGCGATACCTATCCTT<br>TGGACATTGCTTAATAAACGTGGAAATTCAGATACGAAAGAGCGTATTGCT<br>TTGATTCAACGCTTTATAGCCATTTTTGGTAAAGACCGTATTGTGAATGTGT<br>TCGCAGACAGAGAGTTTATCGGTGAGCAGTGGTTTACATGGTTAATTGAA<br>CAAGACATCAACTTCTGCATTCGTGTTAAAAAACTTCATTGTCACCAATCA<br>TTTAG<br>ATGACACATCTCAATGAGTTATATCTTATCTTAAACAAATCTCTAAAATGGA<br>ACAAGTCACATTTAAAGTGCTTTGCGCTCATCATGCTTGTGATTATTTAAA<br>GCAAACATGTAATCTTTCTTCTGCATCTAAAGCCTTGCCCATCAAGTGCTT<br>ACCACAATCATTTTATCGACGTATGCAGCGCTTCTTTGCAGGTCAGTATTT<br>TGATTATCGTCAAATTTCTCAGTTGATTTTCAATATGTTTTATTTCGACCAA<br>GTGCAACTGACTTTAGATAGAACCAATTGGAAATGGGGAAAACGAAATATT<br>AATATCCTGATGCTCGCAATCGTTTATCGTGGAATAGCGATACCTATCCTT<br>TGGACATTGCTTAATAAACGTGGAAATTCAGATACGAAAGAGCGCATTGCT<br>TTGATTCAACGCTTTATAGCCATTTTTGGTAAAGACCGTATTGTGAATGTGT<br>TCGCAGACAGAGAGTTTATCGGTGAGCAGTGGTTTACATGGTTAATTGAA<br>CAAGACATCAACTTCTGCATTCGTGTTAAAAAACTTCATTGTCACCAATCA<br>TTTAG |
| <i>group_</i><br>3286 | IS4<br>family<br>transp<br>osase<br>ISAb<br>33 | A2, A3,<br>A14 | L | Transposase DDE domain |  |                                                                                                                                                                                                                                                                                                                                                                                                                                                                                                                                                                                                                                                                                                                                                                                                                                                                                                                                                                                                                                                                                                                                                                                                                                                                                                                                                                                                                                                                                                                                                                                                                                                                                                                                                |
| <i>group_</i><br>3287 | IS4<br>family<br>transp<br>osase<br>ISAb<br>33 | A2, A3,<br>A14 | L | Transposase DDE domain |  |                                                                                                                                                                                                                                                                                                                                                                                                                                                                                                                                                                                                                                                                                                                                                                                                                                                                                                                                                                                                                                                                                                                                                                                                                                                                                                                                                                                                                                                                                                                                                                                                                                                                                                                                                |



|                   |                                |             |   |                        |                                                                                                                                                                                                                                                                                                                                                                                                                                                                                                                                                                                                                                                                                                                                                                                                                                                                                                                                                                                                                                                                                                                                                                                                                                                                                                                                                                                                                                                                                                                                                                                                                                                                                                                                                                                                                                           |
|-------------------|--------------------------------|-------------|---|------------------------|-------------------------------------------------------------------------------------------------------------------------------------------------------------------------------------------------------------------------------------------------------------------------------------------------------------------------------------------------------------------------------------------------------------------------------------------------------------------------------------------------------------------------------------------------------------------------------------------------------------------------------------------------------------------------------------------------------------------------------------------------------------------------------------------------------------------------------------------------------------------------------------------------------------------------------------------------------------------------------------------------------------------------------------------------------------------------------------------------------------------------------------------------------------------------------------------------------------------------------------------------------------------------------------------------------------------------------------------------------------------------------------------------------------------------------------------------------------------------------------------------------------------------------------------------------------------------------------------------------------------------------------------------------------------------------------------------------------------------------------------------------------------------------------------------------------------------------------------|
| <i>group_3288</i> | IS4 family transposase ISAbA33 | A2, A3, A14 | L | Transposase DDE domain | <p>ATGACACATCTCAATGAGTTATATCTTATCTTAAACAAATCTCTAAAATGGAACAAGTCACATTTAAAGTGCTTTGCGCTCATCATGCTTGTGATTATTTAAA<br/> GCAAACATGTAATCTTTCTTCTGCATCTAAAGCCTTGCCCATCAAGTGCTTACCACAATCATTTTATCGACGTATGCAGCGCTTCTTTGCAGGTCAGTATTT<br/> TGATTATCGTCAAATTTCTCAGTTGATTTTCAATATGTTTTCATTGACCAA<br/> GTGCAACTGACTTTAGATAGAACCAATTGGAAATGGGGAAAACGAAATATT<br/> AATATCCTGATGCTCGCAATCGTTTATCGTGGAATAGCGATACCTATCCTT<br/> TGGACATTGCTTAATAAACGTGGAAATTCAGATACGAAAGAGCGCATTGCT<br/> TTGATTCAACGCTTTATAGCCATTTTTGGTAAAGACCGTATTGTGAATGTGT<br/> TCGCAGACAGAGAGTTTATCGGTGAGCAGTGGTTTACATGGTTAATTGAA<br/> CAAGACATCAACTTCTGCATTCGTGTTAAAAAACTTCATTGTCACCAATCA<br/> TTTAG</p> <p>ATGACACATCTCAATGAGTTATATCTTATCTTAAACAAATATCTAAAATGGAACAAGTCACATTTAAAGTGCTTTGCGCTCATCATGCTTGTGATTATTTAAA<br/> GCAAACATGTAATCTTTCTTCTGCATCTAAAGCCTTGCCCATCAAGTGCTTACCACAATCATTTTATCGACGTATGCAGCGCTTCTTTGCAGGTCAGTATTT<br/> TGATTATCGTCAAATTTCTCAGTTGATTTTCAATATGTTTTCATTGACCAA<br/> GTGCAACTGACTTTAGATAGAACCAATTGGAAATGGGGAAAACGAAATATT<br/> AATATCCTGATGCTCGCAATCGTTTATCGTGGAATAGCGATACCTATCCTT<br/> TGGACATTGCTTAATAAACGTGGAAATTCAGATACGAAAGAGCGTATTGCT<br/> TTGATTCAACGCTTTATAGCCATTTTTGGTAAAGACCGTATTGTGAATGTGT<br/> TCGCAGACAGAGAGTTTATCGGTGAGCAGTGGTTTACATGGTTAATTGAA<br/> CAAGACATCAACTTCTGCATTCGTGTTAAAAAACTTCATTGTCACCAATCA<br/> TTTAG</p> <p>ATGACTACGACAGTTAATTCAGACATGATCATCTATAATCAATTGGCTCAA<br/> ACTGCTTATTTAGAGCGTTTGCAAGATAATTTGAATGTATTTAACCAAGCCT<br/> CTAATGGTGCAATTGTTTATCGCAATGAGATCATTGAAGGTGATTTCAATA<br/> AAGAAGCATTCTACAAAGTGGGCGGTAGCATCAAACATCGTGATGTGAAT<br/> TCAACCGCCAAAGTAGTTCCAGAGAAAATTGGTTCTGGTGAGTCTGTAGG<br/> CGTAAAAGTCCCATATAAATATGGTCCTTATGCATCAACTGAAGAGGCATT<br/> TAAGCGCCGTGCTCGTACACCAGAAGAATTTGCTATGGTTGTTGGTTACG<br/> ATCTTGCAGATGCATTGGTTGCAGGCCGATTAGAGTACAGTTTAGCTTCTT<br/> TAAAAGCTGCTATTTCTAGCAATCCAGACATGGTTGCAAAGGTAGTATCG</p> |
| <i>group_3289</i> | IS4 family transposase ISAbA33 | A2, A3, A14 | L | Transposase DDE domain | <p>ATGACTACGACAGTTAATTCAGACATGATCATCTATAATCAATTGGCTCAA<br/> ACTGCTTATTTAGAGCGTTTGCAAGATAATTTGAATGTATTTAACCAAGCCT<br/> CTAATGGTGCAATTGTTTATCGCAATGAGATCATTGAAGGTGATTTCAATA<br/> AAGAAGCATTCTACAAAGTGGGCGGTAGCATCAAACATCGTGATGTGAAT<br/> TCAACCGCCAAAGTAGTTCCAGAGAAAATTGGTTCTGGTGAGTCTGTAGG<br/> CGTAAAAGTCCCATATAAATATGGTCCTTATGCATCAACTGAAGAGGCATT<br/> TAAGCGCCGTGCTCGTACACCAGAAGAATTTGCTATGGTTGTTGGTTACG<br/> ATCTTGCAGATGCATTGGTTGCAGGCCGATTAGAGTACAGTTTAGCTTCTT<br/> TAAAAGCTGCTATTTCTAGCAATCCAGACATGGTTGCAAAGGTAGTATCG</p>                                                                                                                                                                                                                                                                                                                                                                                                                                                                                                                                                                                                                                                                                                                                                                                                                                                                                                                                                                                                                                                                                                                                                                                                                                                                                                           |
| <i>group_329</i>  | hypothetical protein           | A2, A3, A14 | / | hypothetical protein   | <p>ATGACTACGACAGTTAATTCAGACATGATCATCTATAATCAATTGGCTCAA<br/> ACTGCTTATTTAGAGCGTTTGCAAGATAATTTGAATGTATTTAACCAAGCCT<br/> CTAATGGTGCAATTGTTTATCGCAATGAGATCATTGAAGGTGATTTCAATA<br/> AAGAAGCATTCTACAAAGTGGGCGGTAGCATCAAACATCGTGATGTGAAT<br/> TCAACCGCCAAAGTAGTTCCAGAGAAAATTGGTTCTGGTGAGTCTGTAGG<br/> CGTAAAAGTCCCATATAAATATGGTCCTTATGCATCAACTGAAGAGGCATT<br/> TAAGCGCCGTGCTCGTACACCAGAAGAATTTGCTATGGTTGTTGGTTACG<br/> ATCTTGCAGATGCATTGGTTGCAGGCCGATTAGAGTACAGTTTAGCTTCTT<br/> TAAAAGCTGCTATTTCTAGCAATCCAGACATGGTTGCAAAGGTAGTATCG</p>                                                                                                                                                                                                                                                                                                                                                                                                                                                                                                                                                                                                                                                                                                                                                                                                                                                                                                                                                                                                                                                                                                                                                                                                                                                                                                           |

*group\_3290*  
 IS4 family  
 transposase  
 ISAbal  
 33

A2, A3, A14

L

Transposase DDE domain

*group\_33*  
*eptA\_2*  
 Phosphotransferase  
 EptA

L7, L8, L9, L10

S

Domain of unknown function (DUF1705)

TTGTTGATGGCCGCAAAGCATTGACTCGTGGTATGCGAAAGTTTGGTGAT  
 AAGTTTGGCCGCATTGGCTTATGGGTGATGAACTCAGATACATATTTTCGAT  
 ATTGTCGATGATGCAATCACTAAGCAAATTTATGGTGAATCTGAAATCGTT  
 ATCTACGGTGGTTTACCGGGAACCTTAGGAAAGCCGGTCTTGGTGACGGA  
 CGCTGTAGGTGATAACGATGCTTTTGGTTTGCAGTATGGCGCTGTCACTG  
 TAACTGAATCACAAGTACCGGGCTTCCGAGCTTATGACATCAATGATGAA  
 GAAAACCTAGCAATCGGTATGCGTGCTGAAGGTGCATTTAACTTAGATATT  
 CTTGGTTATAGTTGGGATACATCGAAAGGTGAAAATCCTGACCTTACATTA  
 CTTGGTTCAAGCGCTAACTGGATCAAATATGCAACCAGCAACAAAATGACA  
 GCAGGTACCTTACTTGATTTATCGGGTACAGCGACAACCTGGTTAA  
 ATGACACATCTCAATGAGTTATATCTTATCTTAAACAAATATCTAAAATGGA  
 ACAAGTCACATTTAAAGTGCTTTGCGCTCATCATGCTTGTGATTATTTTAAA  
 GCAAACATGTAATCTTTCTTCTGCATCTAAAGCCTTGCCCATCAAGTGCTT  
 ACCACAATCATTTTATCGACGTATGCAGCGCTTCTTTGCAGGTCAGTATTT  
 TGATTATCGTCAAATTTCTCAGTTGATTTTCAATATGTTTTCATTCGACCAA  
 GTGCAACTGACTTTAGATAGAACCAATTGGAAATGGGGAAAACGAAATATT  
 AATATCCTGATGCTCGCAATCGTTTATCGTGGAATAGCGATACCTATCCTT  
 TGGACATTGCTTAATAAACGTGGAAATTCAGATACGAAAGAGCGTATTGCT  
 TTGATTCAACGCTTTATAGCCATTTTGGTAAAGACCGTATTGTGAATGTGT  
 TCGCAGACAGAGAGTTTATCGGTGAGCAGTGGTTTACATGGTTAATTGAA  
 CAAGACATCAACTTCTGCATTCGTGTTAAAAAACTTCATTGTCACCAATCA  
 TTTAG  
 ATGTTTAATCTCATTATAGCCATTTGGCTAGGTGCAATTTTAAATATTGGTT  
 TTTATCATCAAGTCCATACTTTAACTCCATATTTTGGAGTAAAGGCTATTTT  
 GTTTTTAGCTGCTACTCTCATAATTCTTGTGCTACCTATTATGCGGTTTTA  
 CAAATCTTAAATTGGAAATGGACTGCCAAAATCTTTGCAATTTTATTGATAT  
 TTATTGGTGGTTTTAGCTCTTATTTTGTAAACACATTAGGTGTCATTATTTT  
 ACCCGACCAAATTCAAAATATGGTGCAGACCGATGTTTCGGAAGTTACCG  
 ATCTAATCTCTTTACGCTTTGTTTTATGGACAATTTTTTTTTGTTATTTTACCC  
 ATTTTTTAACTCAAGTTAAATTTAAACAAGAAAAAGTATCACGGTTGTT  
 ATTGAAGAAAGTATTCTCACTGGTAGCTTCATTGGCCGTGGTCCGGTGT  
 ACTTTTTACCTACTATGTGATTTTGTGCAATATTTTCGTGAGCATCGTGAT  
 TAAAAGGGATGATTTACCGCAAATAGTATTTTCATCGCTTATGTCTTACT

ACCATAAGAAGGCTCCGAAGAAAAATCTGCCTCTTGTGATATATGGACAA  
GATGCTCATCAAGTTCAGCGGTACAAAAGAATCTCCCTAAGTTAATGATA  
CTTGTTGTGGGTGAAACGGCACGTGCCGAAAGTTTCTCTCTAAATGGGTA  
TGCAAAAATACGAATCCGGAGCTTTCTAAACAAGATATTTTCAACTTCTCT  
CAAGTGAGCTCATGCGGTACGGCAACAGCGGTTTCTGTGCCATGTATGTT  
CTCGGGTATGCCACGTGTAGATTATGATGAGCAATTAGCCAGTCACCGCG  
AAGGTTTACTAGATATTGCAAAACGTGCGGGTTACCAAGTAACTTGGATTG  
ATAATAACTCGGGTTGTAAAGGTGCATGTGATCGCGTTGAGCAATACCAG  
ATTCCAGAAAACTTAAAGAAAAAATGGTGTAAAGATGGCGAATGTTATGAT  
GACATTCTCATTGACAGCTTAAAGCAGTATTTGTCTACTATTGCCAAAGAT  
GATGATCGTCCACGTTTGATTGTTTTGCATCAGGTGGGTAGTCATGGACC  
TGATATTACAAGCGTGCGCCTGAAGCATATCAACCCTTAAACCGACTTG  
TGATACGAATGCGATACAGGGCTGTTTCGCAAACCGAATTGCTAAATAGTTA  
TGATAATACAATCGTATATACAGACCATGTATTAAGCCAAATGATTAATACT  
CTAAAAGAAATATCAAAATATCAGACAGGTTTATGGTATTTATCTGATCATG  
GCGAATCAACCGGAGAACATGGTTTATATTTACATGGTTCACCTTATGCAA  
TCGCACCGAGCCAACAAACACATGTACCAATGATTATGTGGTTCTCTGAAA  
GTTGGAAACAACATAATCTTGCTCAAGTGAATTGTTTAAGCCAACAACTA  
AACAAAAGTTAAGTCAGGATAATTTATCCCAAGTTTGTAAAGTTTGTCTGGA  
TGTAACAACCTCAGGTCATCAACCCTCAACTGGACATGTTGCACTCTTGTGC  
CCATGTAAACTAA  
ATGACTACAACAGTTAATTCAGACATGATCATCTACAACCAATTGGCTCAA  
ACTGCTTATTTAGAGCGTTTGCAAGACAATTTGAACGTATTTAACCAGGCC  
TCTAATGGTGCAATTGTATATCGCAATGAGATTATTGAAGGTGATTTCAATA  
AAGAGGCATTTTACAAAGTGGGCGGTAGCATCAAGCATCGTGATGTGAAT  
TCAACCGCCAAAGTAGTGCCTGAGAAGATTGGGTCTGGTGAATCTGTAGG  
CGTAAAAGTCCCATATAAATATGGTCCTTATGCTTCAACCGAAGAGGCATT  
CAAACGCCGTGCACGCACACCTGAAGAGTTTGCCATGATTCTTGGTTATG  
ATTTAGCAGATGCATTAGTTGCAGGACGTTTACAGTACAGTTTAGCTTCTT  
TAAAAGCTGCTATTTCTAGCAATCCAGACATGGTTGCAAAGGTAGTATCG  
TTGTTGATGGCCGCAAAGCATTGACTCGTGGTATGCGAAAGTTTGGTGAT  
AAGTTTGGCCGATTGGCTTATGGGTGATGAACTCAGATACATATTTGAT  
ATTGTCGATGATGCAATCACTAAGCAAATTTATGGTGAATCTGAAATCGTT

group\_  
330

hypoth  
etical  
protein

A2, A3,  
A14

N

domain, Protein

|                   |                      |             |            |                      |                                                                                                                                                                                                                                                                                                                                                                                                                                                                                                                                                                                                                                                                                                                                                                                                                                                                                                                                                                                                                                                                                                                                                                                                                                                                                                                                                                                                                                                                                                                                                                                                                                                                                                                                                                                                                    |                                                                                                                  |
|-------------------|----------------------|-------------|------------|----------------------|--------------------------------------------------------------------------------------------------------------------------------------------------------------------------------------------------------------------------------------------------------------------------------------------------------------------------------------------------------------------------------------------------------------------------------------------------------------------------------------------------------------------------------------------------------------------------------------------------------------------------------------------------------------------------------------------------------------------------------------------------------------------------------------------------------------------------------------------------------------------------------------------------------------------------------------------------------------------------------------------------------------------------------------------------------------------------------------------------------------------------------------------------------------------------------------------------------------------------------------------------------------------------------------------------------------------------------------------------------------------------------------------------------------------------------------------------------------------------------------------------------------------------------------------------------------------------------------------------------------------------------------------------------------------------------------------------------------------------------------------------------------------------------------------------------------------|------------------------------------------------------------------------------------------------------------------|
| <i>group_3315</i> | hypothetical protein | A2, A3, A14 | /          | hypothetical protein | <p>ATCTACGGTGGTTTACCGGGAACCTTAGGAAAGCCGGTCTTGGTGACGGA<br/> CGCTGTAGGTGATAACGATGCTTTTGGTTTGCAGTATGGCGCTGTCACTG<br/> TAACTGAATCACAAGTACCGGGCTTCCGAGCTTATGACATCAATGATGAA<br/> GAAAACCTTAGCAATCGGTATGCGTGCTGAAGGTGCATTTAACTTAGATATT<br/> CTTGGTTATAGCTGGGATACATCAAAAGGTGAAAACCCTGACCTTACTTTA<br/> CTTGGTTCAAGTGCCAACTGGAAAAAACATGCTACTAGCAACAAAATGACA<br/> GCAGGCACATTGCTTGATCTATCTGGCACAACAACAACTGGTTAA<br/> ATGAAAAGTCATGATCATTGCTCGATAGGCAATATGACGAGGATCACTAC<br/> AACTGTGTTCACTTTGTTTCATGAAGCTGCAATGGACCTATATGGCATAGAT<br/> CGGGCTGAAGCGCTTGAACTCTTTATGCAGCCTAAGGGCAAAAATTACTTTT<br/> TTATCTTCACGGTTAAACTTTTTAAATCCGCTACCCATGCCCAAGGAAGGC<br/> TGCATAGTCGCCTTCCATCCGAGACAAAGAAATAAGCCCCCGCATGTGGG<br/> GCTTTTTTCGTGGGCAAAAGATTCTTCACCTCATGGAAAGCGGAGTCACTTA<br/> TTTGCCTGAAGAGGTTGTGATGGAAATGGGGTTTAATCGGGTCAGTTATTA<br/> TGATTAA<br/> ATGAAAAGTCATGATCATTGCTCGATAGGCAATATGACGAGGATCACTAC<br/> AACTGTGTTCACTTTGTTTCATGAAGCTGCAATGGACCTATATGGCATAGAT<br/> CGGGCTGAAGCGCTTGAACTCTTTATGCAGCCTAAGGGCAAAAATTACTTTT<br/> TTATCTTCACGGTTAAACTTTTTAAATCCGCTACCCATGCCCAAGGAAGGC<br/> TGCATAGTCGCCTTCCATCCGAGACAAAGAAATAAGCCCCCGCATGTGGG<br/> GCTTTTTTCGTGGGCAAAAGATTCTTCACCTCATGGAAAGCGGAGTCACTTA<br/> TTTGCCTGAAGAGGTTGTGATGGAAATGGGGTTTAATCGGGTCAGTTATTA<br/> TGATTAA<br/> ATGGGATGGAAGGGGAAAAAGCCAACCTGAATTTAGTTTTGATGTGGCTAA<br/> AACAGCAGAAGACCATGTAAGAATATTGTCATGGATACCGTGCAATCCTT<br/> AGTTAATTTAAGTCCCGTCGATACTGGTGCATACCGTGCTTCACATATTGT<br/> CTCGATTAGATCTGCTGATTTAGGCGTGCGTGAACCTGAAACAAACCCTG<br/> TTAACGATGCAGCAATTCAAGCTGTAAAGATTAATTGGGCAATTTGGTCT<br/> ACATTCAGAATAACCAACCTTATGCTGAACGTTTAAAGAAACGGCTGGTCTG<br/> ATCAAGCACCACAAGGTATTTATGGTCTCACGTTTAACTTTATTTCTCAAAA<br/> GTACGGTGGCTAA<br/> ATGATTGACAAAAGTAAGTCCTCACTAAGCGAGGTTTTATCGCAAATTA<br/> GATGGTGCAACCATTCTGATTGGTGGTTTTGGTACCGCAGGACAACCCGC</p> |                                                                                                                  |
| <i>group_3316</i> | hypothetical protein | A2, A3, A14 | /          | hypothetical protein | <p>ATGGGATGGAAGGGGAAAAAGCCAACCTGAATTTAGTTTTGATGTGGCTAA<br/> AACAGCAGAAGACCATGTAAGAATATTGTCATGGATACCGTGCAATCCTT<br/> AGTTAATTTAAGTCCCGTCGATACTGGTGCATACCGTGCTTCACATATTGT<br/> CTCGATTAGATCTGCTGATTTAGGCGTGCGTGAACCTGAAACAAACCCTG<br/> TTAACGATGCAGCAATTCAAGCTGTAAAGATTAATTGGGCAATTTGGTCT<br/> ACATTCAGAATAACCAACCTTATGCTGAACGTTTAAAGAAACGGCTGGTCTG<br/> ATCAAGCACCACAAGGTATTTATGGTCTCACGTTTAACTTTATTTCTCAAAA<br/> GTACGGTGGCTAA<br/> ATGATTGACAAAAGTAAGTCCTCACTAAGCGAGGTTTTATCGCAAATTA<br/> GATGGTGCAACCATTCTGATTGGTGGTTTTGGTACCGCAGGACAACCCGC</p>                                                                                                                                                                                                                                                                                                                                                                                                                                                                                                                                                                                                                                                                                                                                                                                                                                                                                                                                                                                                                                                                                                                                                                                                                                                                  |                                                                                                                  |
| <i>group_332</i>  | hypothetical protein | A2, A3, A14 | /          | hypothetical protein | <p>ATGGGATGGAAGGGGAAAAAGCCAACCTGAATTTAGTTTTGATGTGGCTAA<br/> AACAGCAGAAGACCATGTAAGAATATTGTCATGGATACCGTGCAATCCTT<br/> AGTTAATTTAAGTCCCGTCGATACTGGTGCATACCGTGCTTCACATATTGT<br/> CTCGATTAGATCTGCTGATTTAGGCGTGCGTGAACCTGAAACAAACCCTG<br/> TTAACGATGCAGCAATTCAAGCTGTAAAGATTAATTGGGCAATTTGGTCT<br/> ACATTCAGAATAACCAACCTTATGCTGAACGTTTAAAGAAACGGCTGGTCTG<br/> ATCAAGCACCACAAGGTATTTATGGTCTCACGTTTAACTTTATTTCTCAAAA<br/> GTACGGTGGCTAA<br/> ATGATTGACAAAAGTAAGTCCTCACTAAGCGAGGTTTTATCGCAAATTA<br/> GATGGTGCAACCATTCTGATTGGTGGTTTTGGTACCGCAGGACAACCCGC</p>                                                                                                                                                                                                                                                                                                                                                                                                                                                                                                                                                                                                                                                                                                                                                                                                                                                                                                                                                                                                                                                                                                                                                                                                                                                                  |                                                                                                                  |
| <i>group_3448</i> | <i>pcaI_1</i>        | 3-oxoadi    | L6, L8, L9 | I                    | 3-oxoadipate CoA-transferase activity                                                                                                                                                                                                                                                                                                                                                                                                                                                                                                                                                                                                                                                                                                                                                                                                                                                                                                                                                                                                                                                                                                                                                                                                                                                                                                                                                                                                                                                                                                                                                                                                                                                                                                                                                                              | <p>ATGATTGACAAAAGTAAGTCCTCACTAAGCGAGGTTTTATCGCAAATTA<br/> GATGGTGCAACCATTCTGATTGGTGGTTTTGGTACCGCAGGACAACCCGC</p> |

pate  
CoA-  
transfe  
rase  
subuni  
t A

TGAACTCATTGACGGTCTGATTGATCTTGGCGTTAAGGACCTGACCATTGT  
GAGCAACAATGCCGGTAATGGCGATTATGGTCTGGCTAAACTGCTCAAAG  
CCGGTTCTATTA AAAAAGTGATTGCTCTTTCCACGTCAGTCTGACTCTT  
ATGTGTTTGATGAACTGTACCGTGCCGAAAGGTTGAACTTGAAGTGGTA  
CCGCAAGGCAATCTGGCGTGCCGTATTCAGGCAGCAGGTATGGGCCTTG  
GGGCGGTGTTTACCCCAACTGGCTTTGGAACACTTTTGGCCGAAGGCAAA  
GAAACCCGTCATATTGATGGTAAAGATTACGTGCTTGAGTATCCGATCAAG  
GCTGACTTTGCCCTGATTAAGCCTATAAGGGCGACCGCTGGGGAAATCT  
GGTTTACCGTAAATCTGCACGTAACCTTTGGCCCGATCATGGCCATGGCTG  
CTGATGTCACCATTGCTCAGGTTTCTGAAGTGGTTGAATTGGGTGGATTA  
GACCCGGAACACATCATCACCCAGGTATTTTTGTACAGCATGTTGTACAA  
GTACAGCCCGCACAGTAA  
GTGGATACTACCGCGCCGCAAGCAGGTGAACTGACTTTATCTGACTTGAG  
TGATACAGGTATTTTCAGCAACAGATCAGATCACGCAAGATAAAAACCTTCAA  
TTTAAAGCTTGAAGGACAGGAAAGCGGCAGCCGAGTAACATATTTAGTTT  
CTACCGATGAAGGTAAAACCTGGCAAGAGACGACATTAATCAAAAAGATT  
TAGCTGACGGTATTTATCTTTATAAAGCTGTAGTGACAGACGCTGCTGGCA  
ATACCTCGGAAACGGCTGTACAAAAAGTGGTTGTGGATACTACCACACCA  
CACTCAGGTGAACTGACTCTATCTGACTTGAATGATACAGGCGTTTCAGTA  
ACAGATCAGATCACGCAAGATAAAAACCTTCAATTTAAAGCTTGAAGGACAG  
GAAACTGGTAGCCGAGTAACATATTTAGTTTCCACTGATGAAGGAAAAACT  
TGGCAGGAAACCACGGTAGTCCAAAAGATTTGGCTGACGGTATTTATCA  
ATATAAAGCTGTAGTGACAGACGCTGCTGGCAATACCTCGGAAACGGCTG  
TACAAAAAGTGGTTGTGGATACTNNNNNNNNNAGCAGGTGAACTGA  
ATGACACATCTCAATGAGTTATATCTTATCTTAAACAAATATCTAAAATGGA  
ACAAGTCACATTTAAAGTGCTTTGCGCTCATCATGCTTGTGATTATTTAAA  
GCAAACATGTAATCTTTCTTCTGCATCTAAAGCCTTGCCCATCAAGTGCTT  
ACCACAATCATTTTATCGACGTATGCAGCGCTTCTTTGCAGGTCAGTATTT  
TGATTATCGTCAAATTTCTCAGTTGATTTTCAATATGTTTTATTTCGACCAA  
GTGCAACTGACTTTAGATAGAACCAATTGGAAATGGGGAAAACGAAATATT  
AATATCCTGATGCTCGCAATCGTTTATCGTGGAATAGCGATACCTATCCTT  
TGGACATTGCTTAATAAACGTGGAAATTAG

group\_  
35

hypoth  
etical  
protein

L8, L9,  
L10

Q

von willebrand factor, type A

group\_  
350

IS4  
family  
transp  
osase  
ISAb  
33

A2, A3,  
A14

L

Transposase DDE domain

|                  |                                             |                |   |                        |
|------------------|---------------------------------------------|----------------|---|------------------------|
| <i>group_351</i> | IS4<br>family<br>transposase<br>ISAb1<br>33 | A2, A3,<br>A14 | L | Transposase DDE domain |
|------------------|---------------------------------------------|----------------|---|------------------------|

ATGACACATCTCAATGAGTTATATCTTATCTTAAACAAATATCTAAAATGGA  
 ACAAGTCACATTTAAAGTGCTTTGCGCTCATCATGCTTGTGATTATTTAAA  
 GCAAACATGTAATCTTTCTTCTGCATCTAAAGCCTTGCCCATCAAGTGCTT  
 ACCACAATCATTTTATCGACGTATGCAGCGCTTCTTTGCAGGTCAGTATTT  
 TGATTATCGTCAAATTTCTCAGTTGATTTTCAATATGTTTTATTTCGACCAA  
 GTGCAACTGACTTTAGATAGAACCAATTGGAAATGGGGAAAACGAAATATT  
 AATATCCTGATGCTCGCAATCGTTTATCGTGGAATAGCGATACCTATCCTT  
 TGGACATTGCTTAATAAACGTGGAAATTCAGATACGAAAGAGCGTATTGCT  
 TTGATTCAACGCTTTATAGCCATTTTTGGTAAAGACCGTATTGTGAATGTGT  
 TCTCGCAGACAGAGAGTTTATCGGTGAGCAGTGGTTTACATGGTTAA  
 ATGGCAAATCTTGTTTTTAAATTTAGTTGGGATCATCGGCCATTCCCGTAT  
 AACTCGGCTCAGGGAAAACGGCAATTCATGCTGCCATTGCTTCAGGTAT  
 TCCTAATCTGGCACCAAACTTTTCGCAGGTCCAAGGTAAGTCTGCTGCAGTCT  
 CTCAAGGTGGTACTGGGGCGCAACTGCACTAGATGCTCGAAATAATCTC  
 GGAGCAGCAGAAAAAGGGTGAATAGTGACATTACAGAGCTAAAAGGATT  
 AACCAAGGCTATTGCAATTTCTCAAGGTGGTACCGGTGCAACAACCTCCAT  
 CCGATGCTCGAACTAACTTAGGGCTTGGTAGTGCCGCAACTAGAAATGTT  
 GGTACTACAGCTGGTAATTTGATAGAAGTTGGCAGCTTTGGAATTGGTGG  
 AGTAGGCCAAACTTTTTGAAAGAAAATGATTACGGGAGTAAACCTAGATTCT  
 TGTCGTTAGCTATGTATTGTTATTTCTTATTCTGTGAGCAGCTCACCCAAT  
 CGAAACATGTTTGGTGAGCTAGTGTTCGAGGGGTGATTCAGGCTCAGC  
 AAATCAACATTCGAGAATTTAGTATCAATTCAGCAAGCATATGATCGTGT  
 TACAGCTCGGCTTATTAGTATTGGTGTAAAAACTCATATTTAGGTATGGC  
 TGTAGTTAAATATCAAAATGTAGACTATGTTGCCATTGGAAGAACAGCAAG  
 TTCTTCAACATCGGCATTTAGATATTTTTCCGGTATTTCCAATATTACATCT  
 GATAATTATTTAGTTACTGTTTCATACAGATGACGTTGTTATTGTGAGTGA  
 TACCTGTTGTAATTGAGCAGCTAAGAACATCTGCGAATACTTCTGTGGATT  
 CCAACGGTTTTATAAAAGCAGCATCACCAAGTAGTTAAGCTATTTAACGACC  
 ATATCGAGCTCAATAATGATGCAAAAAACAGCCGATTGAATTTAAGAGAA  
 TTGATGTTGGTGATTATTTACTAGAAGGTTCTTTAGGCTTTGCTCAGGAAG  
 GCTGGTATATCGAAGTACCGAAAGATGCAAGCGGCAACACAATCGTCGCA  
 GTAGTGTATGACACCCTAGAAAATGGTGACATCTCAATTAACCTTACAAG  
 CGTAAGTTTGATTTTGAACCTTGCTGCTGTTGTGGCAGATCACGAGAACCCA

|                   |                         |                |   |                      |
|-------------------|-------------------------|----------------|---|----------------------|
| <i>group_3514</i> | hypothetical<br>protein | A2, A3,<br>A14 | / | hypothetical protein |
|-------------------|-------------------------|----------------|---|----------------------|

|                   |                              |             |   |                                      |                                                                                                                                                                                                                                                                                                                                                                                                                                                                                                                                                                                                                                                                                                                                                                                                                                                                                                                                                                                                                                                                                                                                                                                                                                                                                                                                                                                                                                                                                                                                                                                                                                                                                                                                                                                                                                                                                                       |
|-------------------|------------------------------|-------------|---|--------------------------------------|-------------------------------------------------------------------------------------------------------------------------------------------------------------------------------------------------------------------------------------------------------------------------------------------------------------------------------------------------------------------------------------------------------------------------------------------------------------------------------------------------------------------------------------------------------------------------------------------------------------------------------------------------------------------------------------------------------------------------------------------------------------------------------------------------------------------------------------------------------------------------------------------------------------------------------------------------------------------------------------------------------------------------------------------------------------------------------------------------------------------------------------------------------------------------------------------------------------------------------------------------------------------------------------------------------------------------------------------------------------------------------------------------------------------------------------------------------------------------------------------------------------------------------------------------------------------------------------------------------------------------------------------------------------------------------------------------------------------------------------------------------------------------------------------------------------------------------------------------------------------------------------------------------|
| <i>group_3663</i> | hypothetical protein         | A2, A3, A14 | S | Domain of unknown function (DUF1833) | <p>ATGGACATTCCAGAAGGCCGCTGGATTGATATCCGTCTGCATGAAGAACC<br/> TGAACCAGAACCTGAGGTTGAAGAACTTTGACTGAAACACCAGTGGATT<br/> TCCAGCCGACTAATTATCTCAGGCAGTTGCTGCAGCAATGAATGGCGTG<br/> GAACCCCAGAAATCTCAGACACAGACGAAACACTTTAA<br/> ATGGATAACGAATATGCCAAGTTCTTTTTCAATCGGAAAGTTGATGTCTAT<br/> CAACTGGAGTGTATTGAGCTATCACATCCTTCTTTTATGAATACTTATCGG<br/> GTAGTCCGTAATGATGACCGAGGTGTCTATGTACAACATAAGGAAGGATC<br/> CGGTCAGGTCTATTATGAGTTCTTGCCAGTCTCTATACAAAGATCCGGAAT<br/> GCTTGGTGATCTGGACCAGACATTAACCGTTTCTATCTCTGGTCTAGGTGA<br/> TGTGATGCCTGATGAGTTTGAACGGGTAATCGAAGGGCAATATCCAGATG<br/> TAAAGCCAACCGTAAATTACCGGATTTACAGTTCAGACAATCTGAACTCTC<br/> CAATGTTTTATTTACTTGGACTGCAACTCTCAAGTGTCGCCATGAACCATA<br/> AAGCTGTGACATTCAAGGCTGAATCACCACGATTAATACCACTAAAACCTG<br/> GGGACATTTTTGCACTGGATCGCTTTAGTGGTTTGAAGGGGGCTATATGA<br/> ATGGATAACGAATATGCCAAGTTCTTTTTCAATCGGAAAGTTGATGTCTAT<br/> CAACTGGAGTGTATTGAGCTATCACATCCTTCTTTTATGAATACTTATCGG<br/> GTAGTCCGTAATGATGACCGAGGTGTCTATGTACAACATAAGGAAGGATC<br/> CGGTCAGGTCTATTATGAGTTCTTGCCAGTCTCTATACAAAGATCCGGAAT<br/> GCTTGGTGATCTGGACCAGACATTAACCGTTTCTATCTCTGGTCTAGGTGA<br/> TGTGATGCCTGATGAGTTTGAACGGGTAATCGAAGGGCAATATCCAGATG<br/> TAAAGCCAACCGTAAATTACCGGATTTACAGTTCAGACAATCTGAACTCTC<br/> CAATGTTTTATTTACTTGGACTGCAACTCTCAAGTGTCGCCATGAACCATA<br/> AAGCTGTGACATTCAAGGCTGAATCACCACGATTAATACCACTAAAACCTG<br/> GGGACATTTTTGCACTGGATCGCTTTAGTGGTTTGAAGGGGGCTATATGA<br/> GTGAAACTATATATAAGTGCACTACAGTTAGAAAATGGAGAGCTTTTACTC<br/> GTCGTTTCTCCTCAGTTTAATGCCAATGCTATTACAGGATTATGCATTACGC<br/> TGGGAAATTGAAACCTTATTAGTTGTCTCAAAGGACGCGGGTTTAATCTT<br/> GAAAATACGCGCTTGACAGACCCTAGACGAGTGAAAAAATTGATTGCGGT<br/> GTTAGCTATAAGCTTCTGTTGGTGTACTTAACGGGTGAATGGCAACATGA<br/> TCAAAAAAAGCGATAAAAATAAAGAAGCATGGACGACTCTCAATGAGTTT<br/> ATTTGCTATGGTTTACTATGTTCAAATGGCGATTACGCGTTTAATTGG<br/> TTTTGGGAAAAAAGAAGAGTTTAAGGAAATTTTGGCAATTTTAAGAAGGCA<br/> GAACCCTGATAGGATAAGGGTTCTGTGA</p> |
| <i>group_3664</i> | hypothetical protein         | A2, A3, A14 | S | Domain of unknown function (DUF1833) | <p>ATGGACATTCCAGAAGGCCGCTGGATTGATATCCGTCTGCATGAAGAACC<br/> TGAACCAGAACCTGAGGTTGAAGAACTTTGACTGAAACACCAGTGGATT<br/> TCCAGCCGACTAATTATCTCAGGCAGTTGCTGCAGCAATGAATGGCGTG<br/> GAACCCCAGAAATCTCAGACACAGACGAAACACTTTAA<br/> ATGGATAACGAATATGCCAAGTTCTTTTTCAATCGGAAAGTTGATGTCTAT<br/> CAACTGGAGTGTATTGAGCTATCACATCCTTCTTTTATGAATACTTATCGG<br/> GTAGTCCGTAATGATGACCGAGGTGTCTATGTACAACATAAGGAAGGATC<br/> CGGTCAGGTCTATTATGAGTTCTTGCCAGTCTCTATACAAAGATCCGGAAT<br/> GCTTGGTGATCTGGACCAGACATTAACCGTTTCTATCTCTGGTCTAGGTGA<br/> TGTGATGCCTGATGAGTTTGAACGGGTAATCGAAGGGCAATATCCAGATG<br/> TAAAGCCAACCGTAAATTACCGGATTTACAGTTCAGACAATCTGAACTCTC<br/> CAATGTTTTATTTACTTGGACTGCAACTCTCAAGTGTCGCCATGAACCATA<br/> AAGCTGTGACATTCAAGGCTGAATCACCACGATTAATACCACTAAAACCTG<br/> GGGACATTTTTGCACTGGATCGCTTTAGTGGTTTGAAGGGGGCTATATGA<br/> ATGGATAACGAATATGCCAAGTTCTTTTTCAATCGGAAAGTTGATGTCTAT<br/> CAACTGGAGTGTATTGAGCTATCACATCCTTCTTTTATGAATACTTATCGG<br/> GTAGTCCGTAATGATGACCGAGGTGTCTATGTACAACATAAGGAAGGATC<br/> CGGTCAGGTCTATTATGAGTTCTTGCCAGTCTCTATACAAAGATCCGGAAT<br/> GCTTGGTGATCTGGACCAGACATTAACCGTTTCTATCTCTGGTCTAGGTGA<br/> TGTGATGCCTGATGAGTTTGAACGGGTAATCGAAGGGCAATATCCAGATG<br/> TAAAGCCAACCGTAAATTACCGGATTTACAGTTCAGACAATCTGAACTCTC<br/> CAATGTTTTATTTACTTGGACTGCAACTCTCAAGTGTCGCCATGAACCATA<br/> AAGCTGTGACATTCAAGGCTGAATCACCACGATTAATACCACTAAAACCTG<br/> GGGACATTTTTGCACTGGATCGCTTTAGTGGTTTGAAGGGGGCTATATGA<br/> GTGAAACTATATATAAGTGCACTACAGTTAGAAAATGGAGAGCTTTTACTC<br/> GTCGTTTCTCCTCAGTTTAATGCCAATGCTATTACAGGATTATGCATTACGC<br/> TGGGAAATTGAAACCTTATTAGTTGTCTCAAAGGACGCGGGTTTAATCTT<br/> GAAAATACGCGCTTGACAGACCCTAGACGAGTGAAAAAATTGATTGCGGT<br/> GTTAGCTATAAGCTTCTGTTGGTGTACTTAACGGGTGAATGGCAACATGA<br/> TCAAAAAAAGCGATAAAAATAAAGAAGCATGGACGACTCTCAATGAGTTT<br/> ATTTGCTATGGTTTACTATGTTCAAATGGCGATTACGCGTTTAATTGG<br/> TTTTGGGAAAAAAGAAGAGTTTAAGGAAATTTTGGCAATTTTAAGAAGGCA<br/> GAACCCTGATAGGATAAGGGTTCTGTGA</p> |
| <i>group_3769</i> | IS4 family transposase ISAb1 | A2, A3, A14 | L | Transposase DDE domain               | <p>ATGGACATTCCAGAAGGCCGCTGGATTGATATCCGTCTGCATGAAGAACC<br/> TGAACCAGAACCTGAGGTTGAAGAACTTTGACTGAAACACCAGTGGATT<br/> TCCAGCCGACTAATTATCTCAGGCAGTTGCTGCAGCAATGAATGGCGTG<br/> GAACCCCAGAAATCTCAGACACAGACGAAACACTTTAA<br/> ATGGATAACGAATATGCCAAGTTCTTTTTCAATCGGAAAGTTGATGTCTAT<br/> CAACTGGAGTGTATTGAGCTATCACATCCTTCTTTTATGAATACTTATCGG<br/> GTAGTCCGTAATGATGACCGAGGTGTCTATGTACAACATAAGGAAGGATC<br/> CGGTCAGGTCTATTATGAGTTCTTGCCAGTCTCTATACAAAGATCCGGAAT<br/> GCTTGGTGATCTGGACCAGACATTAACCGTTTCTATCTCTGGTCTAGGTGA<br/> TGTGATGCCTGATGAGTTTGAACGGGTAATCGAAGGGCAATATCCAGATG<br/> TAAAGCCAACCGTAAATTACCGGATTTACAGTTCAGACAATCTGAACTCTC<br/> CAATGTTTTATTTACTTGGACTGCAACTCTCAAGTGTCGCCATGAACCATA<br/> AAGCTGTGACATTCAAGGCTGAATCACCACGATTAATACCACTAAAACCTG<br/> GGGACATTTTTGCACTGGATCGCTTTAGTGGTTTGAAGGGGGCTATATGA<br/> ATGGATAACGAATATGCCAAGTTCTTTTTCAATCGGAAAGTTGATGTCTAT<br/> CAACTGGAGTGTATTGAGCTATCACATCCTTCTTTTATGAATACTTATCGG<br/> GTAGTCCGTAATGATGACCGAGGTGTCTATGTACAACATAAGGAAGGATC<br/> CGGTCAGGTCTATTATGAGTTCTTGCCAGTCTCTATACAAAGATCCGGAAT<br/> GCTTGGTGATCTGGACCAGACATTAACCGTTTCTATCTCTGGTCTAGGTGA<br/> TGTGATGCCTGATGAGTTTGAACGGGTAATCGAAGGGCAATATCCAGATG<br/> TAAAGCCAACCGTAAATTACCGGATTTACAGTTCAGACAATCTGAACTCTC<br/> CAATGTTTTATTTACTTGGACTGCAACTCTCAAGTGTCGCCATGAACCATA<br/> AAGCTGTGACATTCAAGGCTGAATCACCACGATTAATACCACTAAAACCTG<br/> GGGACATTTTTGCACTGGATCGCTTTAGTGGTTTGAAGGGGGCTATATGA<br/> GTGAAACTATATATAAGTGCACTACAGTTAGAAAATGGAGAGCTTTTACTC<br/> GTCGTTTCTCCTCAGTTTAATGCCAATGCTATTACAGGATTATGCATTACGC<br/> TGGGAAATTGAAACCTTATTAGTTGTCTCAAAGGACGCGGGTTTAATCTT<br/> GAAAATACGCGCTTGACAGACCCTAGACGAGTGAAAAAATTGATTGCGGT<br/> GTTAGCTATAAGCTTCTGTTGGTGTACTTAACGGGTGAATGGCAACATGA<br/> TCAAAAAAAGCGATAAAAATAAAGAAGCATGGACGACTCTCAATGAGTTT<br/> ATTTGCTATGGTTTACTATGTTCAAATGGCGATTACGCGTTTAATTGG<br/> TTTTGGGAAAAAAGAAGAGTTTAAGGAAATTTTGGCAATTTTAAGAAGGCA<br/> GAACCCTGATAGGATAAGGGTTCTGTGA</p> |







|                   |                                               |                |   |                        |  |                                                                                                                                                                                                                                                                                                                                                                                                                                                                                                                                                                                                                                                                                                                                                                                                                                                                                                                                                                                                                                                                                                                                                                                                                                                                                                                                                                                                                                                                                                                                                                                                                                                                                                                                                                                                                                                                                                                                                                                                                                                                                                                                                                                                                                                          |
|-------------------|-----------------------------------------------|----------------|---|------------------------|--|----------------------------------------------------------------------------------------------------------------------------------------------------------------------------------------------------------------------------------------------------------------------------------------------------------------------------------------------------------------------------------------------------------------------------------------------------------------------------------------------------------------------------------------------------------------------------------------------------------------------------------------------------------------------------------------------------------------------------------------------------------------------------------------------------------------------------------------------------------------------------------------------------------------------------------------------------------------------------------------------------------------------------------------------------------------------------------------------------------------------------------------------------------------------------------------------------------------------------------------------------------------------------------------------------------------------------------------------------------------------------------------------------------------------------------------------------------------------------------------------------------------------------------------------------------------------------------------------------------------------------------------------------------------------------------------------------------------------------------------------------------------------------------------------------------------------------------------------------------------------------------------------------------------------------------------------------------------------------------------------------------------------------------------------------------------------------------------------------------------------------------------------------------------------------------------------------------------------------------------------------------|
|                   | osase<br>ISAb<br>1                            |                |   |                        |  | GAAAATACGCGCTTGACAGACCCTAGACGAGTGAAAAAATTGATTGCGGT<br>GTTAGCTATAAGCTTCTGTTGGTGTACTTAACGGGTGAATGGCAACATGA<br>TCAAAAAAAGCGATAAAAATAAAGAAGCATGGACGACTCTCAATGAGTTT<br>ATTTTCGCTATGGTTTACTATGTTCAAATGGCGATTCAGCGTTTAATTGG<br>TTTTGGGAAAAAAGAAGAGTTTAAGGAAATTTTGGCAATTTTAAGAAGGCA<br>GAACCCTGATAGGATAAAGGGTTCTGTGA<br>GTGAAACTATATATAAGTGCCTACAGTTAGAAAATGGAGAGCTTTTACTC<br>GTCGTTTCTCCTCAGTTTAATGCCAATGCTATTCAGGATTATGCATTACGC<br>TGGGAAATTGAAACCTTATTAGTTGTCTCAAAGGACGCGGGTTTAATCTT<br>GAAAATACGCGCTTGACAGACCCTAGACGAGTGAAAAAATTGATTGCGGT<br>GTTAGCTATAAGCTTCTGTTGGTGTACTTAACGGGTGAATGGCAACATGA<br>TCAAAAAAAGCGATAAAAATAAAGAAGCATGGACGACTCTCAATGAGTTT<br>ATTTTCGCTATGGTTTACTATGTTCAAATGGCGATTCAGCGTTTAATTGG<br>TTTTGGGAAAAAAGAAGAGTTTAAGGAAATTTTGGCAATTTTAAGAAGGCA<br>GAACCCTGATAGGATAAAGGGTTCTGTGA<br>GTGAAACTATATATAAGTGCCTACAGTTAGAAAATGGAGAGCTTTTACTC<br>GTCGTTTCTCCTCAGTTTAATGCCAATGCTATTCAGGATTATGCATTACGC<br>TGGGAAATTGAAACCTTATTAGTTGTCTCAAAGGACGCGGGTTTAATCTT<br>GAAAATACGCGCTTGACAGACCCTAGACGAGTGAAAAAATTGATTGCGGT<br>GTTAGCTATAAGCTTCTGTTGGTGTACTTAACGGGTGAATGGCAACATGA<br>TCAAAAAAAGCGATAAAAATAAAGAAGCATGGACGACTCTCAATGAGTTT<br>ATTTTCGCTATGGTTTACTATGTTCAAATGGCGATTCAGCGTTTAATTGG<br>TTTTGGGAAAAAAGAAGAGTTTAAGGAAATTTTGGCAATTTTAAGAAGGCA<br>GAACCCTGATAGGATAAAGGGTTCTGTGA<br>GTGAAACTATATATAAGTGCCTACAGTTAGAAAATGGAGAGCTTTTACTC<br>GTCGTTTCTCCTCAGTTTAATGCCAATGCTATTCAGGATTATGCATTACGC<br>TGGGAAATTGAAACCTTATTAGTTGTCTCAAAGGACGCGGGTTTAATCTT<br>GAAAATACGCGCTTGACAGACCCTAGACGAGTGAAAAAATTGATTGCGGT<br>GTTAGCTATAAGCTTCTGTTGGTGTACTTAACGGGTGAATGGCAACATGA<br>TCAAAAAAAGCGATAAAAATAAAGAAGCATGGACGACTCTCAATGAGTTT<br>ATTTTCGCTATGGTTTACTATGTTCAAATGGCGATTCAGCGTTTAATTGG<br>TTTTGGGAAAAAAGAAGAGTTTAAGGAAATTTTGGCAATTTTAAGAAGGCA<br>GAACCCTGATAGGATAAAGGGTTCTGTGA<br>GTGAAACTATATATAAGTGCCTACAGTTAGAAAATGGAGAGCTTTTACTC<br>GTCGTTTCTCCTCAGTTTAATGCCAATGCTATTCAGGATTATGCATTACGC<br>TGGGAAATTGAAACCTTATTAGTTGTCTCAAAGGACGCGGGTTTAATCTT<br>GAAAATACGCGCTTGACAGACCCTAGACGAGTGAAAAAATTGATTGCGGT<br>GTTAGCTATAAGCTTCTGTTGGTGTACTTAACGGGTGAATGGCAACATGA<br>TCAAAAAAAGCGATAAAAATAAAGAAGCATGGACGACTCTCAATGAGTTT<br>ATTTTCGCTATGGTTTACTATGTTCAAATGGCGATTCAGCGTTTAATTGG<br>TTTTGGGAAAAAAGAAGAGTTTAAGGAAATTTTGGCAATTTTAAGAAGGCA<br>GAACCCTGATAGGATAAAGGGTTCTGTGA |
| <i>group_3778</i> | IS4<br>family<br>transp<br>osase<br>ISAb<br>1 | A2, A3,<br>A14 | L | Transposase DDE domain |  |                                                                                                                                                                                                                                                                                                                                                                                                                                                                                                                                                                                                                                                                                                                                                                                                                                                                                                                                                                                                                                                                                                                                                                                                                                                                                                                                                                                                                                                                                                                                                                                                                                                                                                                                                                                                                                                                                                                                                                                                                                                                                                                                                                                                                                                          |
| <i>group_3779</i> | IS4<br>family<br>transp<br>osase<br>ISAb<br>1 | A2, A3,<br>A14 | L | Transposase DDE domain |  |                                                                                                                                                                                                                                                                                                                                                                                                                                                                                                                                                                                                                                                                                                                                                                                                                                                                                                                                                                                                                                                                                                                                                                                                                                                                                                                                                                                                                                                                                                                                                                                                                                                                                                                                                                                                                                                                                                                                                                                                                                                                                                                                                                                                                                                          |
| <i>group_3780</i> | IS4<br>family<br>transp<br>osase<br>ISAb<br>1 | A2, A3,<br>A14 | L | Transposase DDE domain |  |                                                                                                                                                                                                                                                                                                                                                                                                                                                                                                                                                                                                                                                                                                                                                                                                                                                                                                                                                                                                                                                                                                                                                                                                                                                                                                                                                                                                                                                                                                                                                                                                                                                                                                                                                                                                                                                                                                                                                                                                                                                                                                                                                                                                                                                          |





|                   |                                               |                |   |                        |  |                                                                                                                                                                                                                                                                                                                                                                                                                                                                                                                                                                                                                                                                                                                                                                                                                                                                                                                                                                                                                                                                                                                                                                                                                                                                                                                                                                                                                                                                                                                                                                                                                                                                                                                                                                                                                                                                                                                                                                                                                                                                                                                                                                                                                                                                                  |
|-------------------|-----------------------------------------------|----------------|---|------------------------|--|----------------------------------------------------------------------------------------------------------------------------------------------------------------------------------------------------------------------------------------------------------------------------------------------------------------------------------------------------------------------------------------------------------------------------------------------------------------------------------------------------------------------------------------------------------------------------------------------------------------------------------------------------------------------------------------------------------------------------------------------------------------------------------------------------------------------------------------------------------------------------------------------------------------------------------------------------------------------------------------------------------------------------------------------------------------------------------------------------------------------------------------------------------------------------------------------------------------------------------------------------------------------------------------------------------------------------------------------------------------------------------------------------------------------------------------------------------------------------------------------------------------------------------------------------------------------------------------------------------------------------------------------------------------------------------------------------------------------------------------------------------------------------------------------------------------------------------------------------------------------------------------------------------------------------------------------------------------------------------------------------------------------------------------------------------------------------------------------------------------------------------------------------------------------------------------------------------------------------------------------------------------------------------|
|                   | osase<br>ISAb<br>1                            |                |   |                        |  | GAAAATACGCGCTTGACAGACCCTAGACGAGTGAAAAAATTGATTGCGGT<br>GTTAGCTATAAGCTTCTGTTGGTGTACTTAACGGGTGAATGGCAACATGA<br>TCAAAAAAAGCGATAAAAATAAAGAAGCATGGACGACTCTCAATGAGTTT<br>ATTTTCGCTATGGTTTACTATGTTCAAATGGCGATTCAGCGTTTAATTGG<br>TTTTGGGAAAAAAGAAGAGTTTAAGGAAATTTTGGCAATTTTAAGAAGGCA<br>GAACCCTGATAGGATAAAGGGTTCTGTGA<br>GTGAAACTATATATAAGTGCCTACAGTTAGAAAATGGAGAGCTTTTACTC<br>GTCGTTTCTCCTCAGTTTAATGCCAATGCTATTCAGGATTATGCATTACGC<br>TGGGAAATTGAAACCTTATTAGTTGTCTCAAAGGACGCGGGTTTAATCTT<br>GAAAATACGCGCTTGACAGACCCTAGACGAGTGAAAAAATTGATTGCGGT<br>GTTAGCTATAAGCTTCTGTTGGTGTACTTAACGGGTGAATGGCAACATGA<br>TCAAAAAAAGCGATAAAAATAAAGAAGCATGGACGACTCTCAATGAGTTT<br>ATTTTCGCTATGGTTTACTATGTTCAAATGGCGATTCAGCGTTTAATTGG<br>TTTTGGGAAAAAAGAAGAGTTTAAGGAAATTTTGGCAATTTTAAGAAGGCA<br>GAACCCTGATAGGATAAAGGGTTCTGTGA<br>GTGAAACTATATATAAGTGCCTACAGTTAGAAAATGGAGAGCTTTTACTC<br>GTCGTTTCTCCTCAGTTTAATGCCAATGCTATTCAGGATTATGCATTACGC<br>TGGGAAATTGAAACCTTATTAGTTGTCTCAAAGGACGCGGGTTTAATCTT<br>GAAAATACGCGCTTGACAGACCCTAGACGAGTGAAAAAATTGATTGCGGT<br>GTTAGCTATAAGCTTCTGTTGGTGTACTTAACGGGTGAATGGCAACATGA<br>TCAAAAAAAGCGATAAAAATAAAGAAGCATGGACGACTCTCAATGAGTTT<br>ATTTTCGCTATGGTTTACTATGTTCAAATGGCGATTCAGCGTTTAATTGG<br>TTTTGGGAAAAAAGAAGAGTTTAAGGAAATTTTGGCAATTTTAAGAAGGCA<br>GAACCCTGATAGGATAAAGGGTTCTGTGA<br>GTGAAACTATATATAAGTGCCTACAGTTAGAAAATGGAGAGCTTTTACTC<br>GTCGTTTCTCCTCAGTTTAATGCCAATGCTATTCAGGATTATGCATTACGC<br>TGGGAAATTGAAACCTTATTAGTTGTCTCAAAGGACGCGGGTTTAATCTT<br>GAAAATACGCGCTTGACAGACCCTAGACGAGTGAAAAAATTGATTGCGGT<br>GTTAGCTATAAGCTTCTGTTGGTGTACTTAACGGGTGAATGGCAACATGA<br>TCAAAAAAAGCGATAAAAATAAAGAAGCATGGACGACTCTCAATGAGTTT<br>ATTTTCGCTATGGTTTACTATGTTCAAATGGCGATTCAGCGTTTAATTGG<br>TTTTGGGAAAAAAGAAGAGTTTAAGGAAATTTTGGCAATTTTAAGAAGGCA<br>GAACCCTGATAGGATAAAGGGTTCTGTGA<br>ATGAAAAAATAATTGTAATTTCTACAACACTTTTAGGCCTTACGGGATGTG<br>CCATTCCTGCGGTAATAATCTCGTAAGATCCACAAATATGTATCAGGATG<br>ATGTTTCGGGAAATACTGCAAATTTAAGGGTTTATAGAAGTAATATCCCAT<br>GGTGCAGTTCTATATTACTTATCAAATAATGAGGGTGAAAAATTTCAAAA<br>AACCTAATAACTAAGCAGATTTCAAATAATTTAACAAAGTATGGCTCTATGC<br>ATGAGCCCAAAAATTAATATGCCTAAACCCACAATCAGTTTAAATAATG<br>GTGAAGAGTTTTTTGAGTTTAAAGTACCCGCAAATAAGAAGTTAACTTTCA<br>GGCTTACTTCTGTTATTGGGTCACTACTATGTATAGTTGTGATGTAAAAAT<br>GGACTATCAGTTGGAAAGAAATGGAAATTATGAATTGATCCGTTTAAACA |
| <i>group_3789</i> | IS4<br>family<br>transp<br>osase<br>ISAb<br>1 | A2, A3,<br>A14 | L | Transposase DDE domain |  |                                                                                                                                                                                                                                                                                                                                                                                                                                                                                                                                                                                                                                                                                                                                                                                                                                                                                                                                                                                                                                                                                                                                                                                                                                                                                                                                                                                                                                                                                                                                                                                                                                                                                                                                                                                                                                                                                                                                                                                                                                                                                                                                                                                                                                                                                  |
| <i>group_3790</i> | IS4<br>family<br>transp<br>osase<br>ISAb<br>1 | A2, A3,<br>A14 | L | Transposase DDE domain |  |                                                                                                                                                                                                                                                                                                                                                                                                                                                                                                                                                                                                                                                                                                                                                                                                                                                                                                                                                                                                                                                                                                                                                                                                                                                                                                                                                                                                                                                                                                                                                                                                                                                                                                                                                                                                                                                                                                                                                                                                                                                                                                                                                                                                                                                                                  |
| <i>group_3798</i> | hypoth<br>etical<br>protein                   | A2, A3,<br>A14 | / | hypothetical protein   |  |                                                                                                                                                                                                                                                                                                                                                                                                                                                                                                                                                                                                                                                                                                                                                                                                                                                                                                                                                                                                                                                                                                                                                                                                                                                                                                                                                                                                                                                                                                                                                                                                                                                                                                                                                                                                                                                                                                                                                                                                                                                                                                                                                                                                                                                                                  |

|                   |                                               |             |   |                                       |                                                                                                                                                                                                                                                                                                                                                                                                                                                                                                                                                                                                                                                                                                                                                                                                                                                                                                                                                                                                                                                                                                                                                                                                                                                                                                                                                                                                                                                                                                                                                                                                                                                                                                                                                                                                                                                     |
|-------------------|-----------------------------------------------|-------------|---|---------------------------------------|-----------------------------------------------------------------------------------------------------------------------------------------------------------------------------------------------------------------------------------------------------------------------------------------------------------------------------------------------------------------------------------------------------------------------------------------------------------------------------------------------------------------------------------------------------------------------------------------------------------------------------------------------------------------------------------------------------------------------------------------------------------------------------------------------------------------------------------------------------------------------------------------------------------------------------------------------------------------------------------------------------------------------------------------------------------------------------------------------------------------------------------------------------------------------------------------------------------------------------------------------------------------------------------------------------------------------------------------------------------------------------------------------------------------------------------------------------------------------------------------------------------------------------------------------------------------------------------------------------------------------------------------------------------------------------------------------------------------------------------------------------------------------------------------------------------------------------------------------------|
| <i>group_3799</i> | hypothetical protein                          | A2, A3, A14 | / | hypothetical protein                  | <p>GATCAAAGATTTTGTGAATCCAGCTTTACTGACTGAACCATCTCAAGATGA<br/> AGCCTACTGCAAGTTTGTAGTAAAAGAGATTTTTGAAGATGGTAAAGAAAC<br/> TATTATTAATCGATTTCTTAA<br/> ATGAAAAAATAATTGTAATTTCTACAACACTTTTAGGCCTTACGGGATGTG<br/> CCATTCCTGCGGTAAATAATCTCGTAAGATCCACAAATATGTATCAGGATG<br/> ATGTTTCGGGAAATACTGCAAATTTAAGGGTTTATAGAAGTAATATCCCAT<br/> GGTGCAGTTCTATATTACTTATCAAATAATGAGGGTGAAAAATTTCAAAA<br/> AACCTAATAACTAAGCAGATTTCAAATAATTTAACAAAGTATGGCTCTATGC<br/> ATGAGCCCAAAAAATTAATATGCCTAAACCCACAATCAGTTTAAATAATG<br/> GTGAAGAGTTTTTTGAGTTTAAAGTACCCGCAAATAAGAAGTTAACTTTCA<br/> GGCTTACTTCTGTTATTGGGTCAACTACTATGTATAGTTGTGATGTAAAAAT<br/> GGACTATCAGTTGGAAAGAAATGGAAATTATGAATTGATCCGTTTAAACA<br/> GATCAAAGATTTTGTGAATCCAGCTTTACTGACTGAACCATCTCAAGATGA<br/> AGCCTACTGCAAGTTTGTAGTAAAAGAGATTTTTGAAGATGGTAAAGAAAC<br/> TATTATTAATCGATTTCTTAA<br/> ATGGGCTTTTTTATTTCTAAAATTTAGAGGTTGTTATGGCTTTAAAAGTCG<br/> GAATTATTAAGCTCGGACGTATCAAATGGTGTGAATACAAGGGGGTT<br/> GATGGCGAAGTACAGGCAGAGTTCAAAGTCCGTGGTATCGCCTATAAACC<br/> TTTTCAGGTAGCAATTGAACGAGCCGGAATCAGATTTTCAATCAAAGGCTA<br/> TGATGTGATGGTCAAAGATGAAAATGCCAAGCTTTACCATGAATTGTTAAT<br/> GGATGCGTGTGCTGCCCACTTAATTGAAGACTGGAAAGGTGTGGTATTTG<br/> CCGAAATCGTAGACGGTAAAACGGTTGAATCTGAAAAGCCATATACACCT<br/> GAGAATGCCTCAAAGCTTCTTAATCTTGGTGATATTGGTATTTCAATCTGG<br/> CTATTCATTAAGAAGCAGGCTCAGAAGATTCAGGAAGAAGCCGACAAGGA<br/> TAAGGCTTTAATTCTGGGAAAAGTCATCGAGCTCTACAAATACCAAAAAACG<br/> TATGCGTCGAAAACGCCGCATGAAATCGAACAAATCAAGTTCTTAG<br/> ATGGGCCTTGGGGCGGTGTTTACCCCAACTGGCTTTGGAACACTTTTGGC<br/> CGAAGGCAAAGAAACCCGTCATATTGATGGTAAAGATTACGTGCTTGAGT<br/> ATCCGATCAAGGCTGACTTTGCCCTGATTAAGCCTATAAGGGCGACCCG<br/> TGGGAAATCTGGTTTACCGTAAATCTGCACGTAACCTTTGGCCGATCAT<br/> GGCCATGGCTGCTGATGTCACCATTGCTCAGGTTTCTGAAGTGGTTGAAT<br/> TGGGTGGATTAGACCCGGAACACATCATCACCCAGGTATTTTTGTACAG<br/> CATGTTGTACAAGTACAGCCCGCACAGTAA</p> |
| <i>group_38</i>   | hypothetical protein                          | A2, A3, A14 | / | hypothetical protein                  | <p>GATCAAAGATTTTGTGAATCCAGCTTTACTGACTGAACCATCTCAAGATGA<br/> AGCCTACTGCAAGTTTGTAGTAAAAGAGATTTTTGAAGATGGTAAAGAAAC<br/> TATTATTAATCGATTTCTTAA<br/> ATGAAAAAATAATTGTAATTTCTACAACACTTTTAGGCCTTACGGGATGTG<br/> CCATTCCTGCGGTAAATAATCTCGTAAGATCCACAAATATGTATCAGGATG<br/> ATGTTTCGGGAAATACTGCAAATTTAAGGGTTTATAGAAGTAATATCCCAT<br/> GGTGCAGTTCTATATTACTTATCAAATAATGAGGGTGAAAAATTTCAAAA<br/> AACCTAATAACTAAGCAGATTTCAAATAATTTAACAAAGTATGGCTCTATGC<br/> ATGAGCCCAAAAAATTAATATGCCTAAACCCACAATCAGTTTAAATAATG<br/> GTGAAGAGTTTTTTGAGTTTAAAGTACCCGCAAATAAGAAGTTAACTTTCA<br/> GGCTTACTTCTGTTATTGGGTCAACTACTATGTATAGTTGTGATGTAAAAAT<br/> GGACTATCAGTTGGAAAGAAATGGAAATTATGAATTGATCCGTTTAAACA<br/> GATCAAAGATTTTGTGAATCCAGCTTTACTGACTGAACCATCTCAAGATGA<br/> AGCCTACTGCAAGTTTGTAGTAAAAGAGATTTTTGAAGATGGTAAAGAAAC<br/> TATTATTAATCGATTTCTTAA<br/> ATGGGCTTTTTTATTTCTAAAATTTAGAGGTTGTTATGGCTTTAAAAGTCG<br/> GAATTATTAAGCTCGGACGTATCAAATGGTGTGAATACAAGGGGGTT<br/> GATGGCGAAGTACAGGCAGAGTTCAAAGTCCGTGGTATCGCCTATAAACC<br/> TTTTCAGGTAGCAATTGAACGAGCCGGAATCAGATTTTCAATCAAAGGCTA<br/> TGATGTGATGGTCAAAGATGAAAATGCCAAGCTTTACCATGAATTGTTAAT<br/> GGATGCGTGTGCTGCCCACTTAATTGAAGACTGGAAAGGTGTGGTATTTG<br/> CCGAAATCGTAGACGGTAAAACGGTTGAATCTGAAAAGCCATATACACCT<br/> GAGAATGCCTCAAAGCTTCTTAATCTTGGTGATATTGGTATTTCAATCTGG<br/> CTATTCATTAAGAAGCAGGCTCAGAAGATTCAGGAAGAAGCCGACAAGGA<br/> TAAGGCTTTAATTCTGGGAAAAGTCATCGAGCTCTACAAATACCAAAAAACG<br/> TATGCGTCGAAAACGCCGCATGAAATCGAACAAATCAAGTTCTTAG<br/> ATGGGCCTTGGGGCGGTGTTTACCCCAACTGGCTTTGGAACACTTTTGGC<br/> CGAAGGCAAAGAAACCCGTCATATTGATGGTAAAGATTACGTGCTTGAGT<br/> ATCCGATCAAGGCTGACTTTGCCCTGATTAAGCCTATAAGGGCGACCCG<br/> TGGGAAATCTGGTTTACCGTAAATCTGCACGTAACCTTTGGCCGATCAT<br/> GGCCATGGCTGCTGATGTCACCATTGCTCAGGTTTCTGAAGTGGTTGAAT<br/> TGGGTGGATTAGACCCGGAACACATCATCACCCAGGTATTTTTGTACAG<br/> CATGTTGTACAAGTACAGCCCGCACAGTAA</p> |
| <i>group_4</i>    | <i>pcal_2</i><br>3-oxoadipate CoA-transferase | L10         | I | 3-oxoadipate CoA-transferase activity | <p>GATCAAAGATTTTGTGAATCCAGCTTTACTGACTGAACCATCTCAAGATGA<br/> AGCCTACTGCAAGTTTGTAGTAAAAGAGATTTTTGAAGATGGTAAAGAAAC<br/> TATTATTAATCGATTTCTTAA<br/> ATGAAAAAATAATTGTAATTTCTACAACACTTTTAGGCCTTACGGGATGTG<br/> CCATTCCTGCGGTAAATAATCTCGTAAGATCCACAAATATGTATCAGGATG<br/> ATGTTTCGGGAAATACTGCAAATTTAAGGGTTTATAGAAGTAATATCCCAT<br/> GGTGCAGTTCTATATTACTTATCAAATAATGAGGGTGAAAAATTTCAAAA<br/> AACCTAATAACTAAGCAGATTTCAAATAATTTAACAAAGTATGGCTCTATGC<br/> ATGAGCCCAAAAAATTAATATGCCTAAACCCACAATCAGTTTAAATAATG<br/> GTGAAGAGTTTTTTGAGTTTAAAGTACCCGCAAATAAGAAGTTAACTTTCA<br/> GGCTTACTTCTGTTATTGGGTCAACTACTATGTATAGTTGTGATGTAAAAAT<br/> GGACTATCAGTTGGAAAGAAATGGAAATTATGAATTGATCCGTTTAAACA<br/> GATCAAAGATTTTGTGAATCCAGCTTTACTGACTGAACCATCTCAAGATGA<br/> AGCCTACTGCAAGTTTGTAGTAAAAGAGATTTTTGAAGATGGTAAAGAAAC<br/> TATTATTAATCGATTTCTTAA<br/> ATGGGCTTTTTTATTTCTAAAATTTAGAGGTTGTTATGGCTTTAAAAGTCG<br/> GAATTATTAAGCTCGGACGTATCAAATGGTGTGAATACAAGGGGGTT<br/> GATGGCGAAGTACAGGCAGAGTTCAAAGTCCGTGGTATCGCCTATAAACC<br/> TTTTCAGGTAGCAATTGAACGAGCCGGAATCAGATTTTCAATCAAAGGCTA<br/> TGATGTGATGGTCAAAGATGAAAATGCCAAGCTTTACCATGAATTGTTAAT<br/> GGATGCGTGTGCTGCCCACTTAATTGAAGACTGGAAAGGTGTGGTATTTG<br/> CCGAAATCGTAGACGGTAAAACGGTTGAATCTGAAAAGCCATATACACCT<br/> GAGAATGCCTCAAAGCTTCTTAATCTTGGTGATATTGGTATTTCAATCTGG<br/> CTATTCATTAAGAAGCAGGCTCAGAAGATTCAGGAAGAAGCCGACAAGGA<br/> TAAGGCTTTAATTCTGGGAAAAGTCATCGAGCTCTACAAATACCAAAAAACG<br/> TATGCGTCGAAAACGCCGCATGAAATCGAACAAATCAAGTTCTTAG<br/> ATGGGCCTTGGGGCGGTGTTTACCCCAACTGGCTTTGGAACACTTTTGGC<br/> CGAAGGCAAAGAAACCCGTCATATTGATGGTAAAGATTACGTGCTTGAGT<br/> ATCCGATCAAGGCTGACTTTGCCCTGATTAAGCCTATAAGGGCGACCCG<br/> TGGGAAATCTGGTTTACCGTAAATCTGCACGTAACCTTTGGCCGATCAT<br/> GGCCATGGCTGCTGATGTCACCATTGCTCAGGTTTCTGAAGTGGTTGAAT<br/> TGGGTGGATTAGACCCGGAACACATCATCACCCAGGTATTTTTGTACAG<br/> CATGTTGTACAAGTACAGCCCGCACAGTAA</p> |

|                   |               |                      |             |   |  |                                      |                                                                                                                                                                                                                                                                                                                                                                                                                                                                                                                                                                                                                                                                                                                                                                                                                                                                                                                                                                                                                                                                                                                                                                                                                                                                                                                                                                                                                                                                                                                                                               |
|-------------------|---------------|----------------------|-------------|---|--|--------------------------------------|---------------------------------------------------------------------------------------------------------------------------------------------------------------------------------------------------------------------------------------------------------------------------------------------------------------------------------------------------------------------------------------------------------------------------------------------------------------------------------------------------------------------------------------------------------------------------------------------------------------------------------------------------------------------------------------------------------------------------------------------------------------------------------------------------------------------------------------------------------------------------------------------------------------------------------------------------------------------------------------------------------------------------------------------------------------------------------------------------------------------------------------------------------------------------------------------------------------------------------------------------------------------------------------------------------------------------------------------------------------------------------------------------------------------------------------------------------------------------------------------------------------------------------------------------------------|
|                   |               | subunit A            |             |   |  |                                      |                                                                                                                                                                                                                                                                                                                                                                                                                                                                                                                                                                                                                                                                                                                                                                                                                                                                                                                                                                                                                                                                                                                                                                                                                                                                                                                                                                                                                                                                                                                                                               |
| <i>group_4003</i> |               | hypothetical protein | A2, A3, A14 | / |  | hypothetical protein                 | <p>ATGGACAATTCAAAACGACCAATCAACCAGATTATTGCTCGCATCAATGATGCTGCGAAACATGGTGAAGCTTTGGTGCTAACCGCTGAAGAAGTAAAGATCTTTCTAAAGATATTGGCGACAAAGTCTTTATTCCTGTGCTTACTAATGAGCAGGTCGTGCAGTTGGTAAAAGAAGGAAAGCTAGGCCAGAAAATTAATAACACAAAAGATTAA</p> <p>ATGATTGATGGTGCATTCTTCCAAGACGAAGTGAACAACGCAAAATCATGGCTGTACCGATGGTATTCCAGGACAATGAACACATTGGTCAAGGTCGATGACGCTTGAAGAGATTGTGGCAAACTTGATACCAATTCAGCTGAAAAAGACGCAGCAGCACTCAATGCCAAAGATGCGTTTGATGTATTGGTGATTGGTGGTGGACCTGCGGGTGCAACAGCTGCAATCTATGCGGCACGTAAAGGCA TTAACACAGGTATCGTGGCTGAACGCTTTGGTGGTCAGGTCATGGACACCATGGATATTGAAACTTCACTTCTGTGCAAAAGACCCAAGGTCCTAAGTTTGCTGCTGAAATGGAAGCACATGTTTCGTGAATACGATGTGGATATTATGAACCTGCAACGTGTCAGCAAAATCACTGGTGCAGACCAAACAGCAAATGGCTGGTTGAAGTTGAACTTGA AAAACGGTGCAAACTTGAATCGAAA ACTGTGATCCTTTCAACAGGGGCACGTTGGAGAGAAATGAATGTACCAGGTGAAGCTGAATACCGTACCCGTGGTGTAGCGTACTGTCCACACTGTGATGGTCCATTGTTCAAAGGCAAACGTGTTGCTGTGATTGGTGGTGGTAACTCAGGTGTTGAAGCGCGATTGACCTTGCAGGTATTGTTGAGCATGTA ACTCTGGTTGAGTTCGACACTAACTTCGTGCTGACCAAGTCTTGCAAAACAAGTTAAATAGCTTGCCAAACACCACCGTGATTATGAATGCATTAAGCACAGAAGTATTAGGTGACGGTTCACAAGTAACCGGTCTTAAATATAAAGACCGTACA ACTGATGAAGAGCATGTGGTAGAGCTTGCAGGGATCTTTGTACAGATTGGTTTACTTCCAAACTGACTTTTTAAAAGACAGTGAGGTTGAGTTAACCAACCGTGGTGA GATCATTGTCAATGACCGCAACGAAACCAATGTA AAAAGGTGATTTGCTGCGGGTACTGTACCACTGTACCTTACAAGCAAATCATTATTGCTACAGGTGAAGGCGCTAAAGCATCACTCTCTGCGTTTGATTACATCATCCGTTCTGGGCAATAA</p> <p>TTGCAGAATCTGCCAGCCAATGATGTTCTCCTTACTGGTTCACGCGGCACAGGAAAATCTTCAATTGTCCGTGCCCTTTTAACCGAGTATAAAGATCAAGGATTACGTTTAATTGAAATTGAACGTGATGATCTGTCCGATCTTCTGAAATC</p> |
| <i>group_41</i>   | <i>ahpF_1</i> | NADH dehydrogenase   | L8, L9, L10 | C |  | Alkyl hydroperoxide reductase        |                                                                                                                                                                                                                                                                                                                                                                                                                                                                                                                                                                                                                                                                                                                                                                                                                                                                                                                                                                                                                                                                                                                                                                                                                                                                                                                                                                                                                                                                                                                                                               |
| <i>group_4127</i> |               | hypothetical protein | A2, A3, A14 | S |  | Protein of unknown function (DUF815) |                                                                                                                                                                                                                                                                                                                                                                                                                                                                                                                                                                                                                                                                                                                                                                                                                                                                                                                                                                                                                                                                                                                                                                                                                                                                                                                                                                                                                                                                                                                                                               |

|               |              |        |        |   |                               |
|---------------|--------------|--------|--------|---|-------------------------------|
|               |              | Alkyl  |        |   |                               |
|               |              | hydrop |        |   |                               |
|               |              | eroxid |        |   |                               |
| <i>group_</i> | <i>ahpF_</i> | e      | L8, L9 | C | Alkyl hydroperoxide reductase |
| 42            | 2            | reduct |        |   |                               |
|               |              | ase    |        |   |                               |
|               |              | subuni |        |   |                               |
|               |              | t F    |        |   |                               |

CAGAAGCTCATCCAGAAGCGTCCGGAAAAGTTCATTGTCTACTGCGATGA  
 TCTGGCCTTTAATGCTGAAGATGAAAACATCGCAGCTTAAAAAGTGTACT  
 TGATGGCTCATTACAGTCAGGTTCAAGTAATTTTATTATTTATGCAACCAGC  
 AACCGTCGACATCTGTTACCAGAATTTATGCATGAGAACACGCCAGTGAC  
 TCGTGTAGATGTACCGCAATATACCGAGTTGCATCCACAAGAAGCCATTG  
 AGGAAAAATTTCACTCTCGGATCGTTTTGGAATGTGGCTTTTCATTCTATC  
 CAATGGATCAAACCTGTATTTAACCATTTGAGAACACTATCTTGCTAAAAC  
 AGATATGCCAATGAATGACGAAGCCCATGCTGAAGCCCTACGCTGGTGTC  
 AGGCACGTGGTCAACGGTCAGGACGTGCCGCCTATCAGTTCTCTAAACAC  
 TGGATTGGATCACAACTAAAAGCACTGTAA  
 GTGTCTGGCTATGCACCTAAAGTGTCCGGATGAAGTTTTAAATCAGATTA  
 GGCTTAAACCTCAAAGCTAACTTTGATGTATTTGTATCACTCAGCTGTCAT  
 AACTGTCCGGACGTGGTACAGGCGCTTAACCTGATTGCCATTTATAACCC  
 GAACACCACGGCAACCATGATTGATGGTGCATTCTTCCAAGACGAAGTGG  
 AACACGCAAAATCATGGCTGTACCGATGGTATTCCAGGACAATGAACAC  
 ATTGGTCAAGGTCGTATGACGCTTGAAGAGATTGTGGCAAACTTGATAC  
 CAATTCAGCTGAAAAGACGCAGCAGCACTCAATGCCAAAGATGCGTTTG  
 ATGTATTGGTGATTGGTGGTGGACCTGCGGGTGCAACAGCTGCAATCTAT  
 GCGGCACGTAAGGCATTAACACAGGTATCGTGGCTGAACGCTTTGGTG  
 GTCAGGTCATGGATACCATGGACATTGAAAACCTTCACTTCTGTGCAAAAA  
 CACAAGGTCCTAAGTTTGTGCTGCTGAAATGGAAGCACATGTTTCGTGAATAC  
 GATGTGGATATCATGAACCTGCAACGTGTCAGCAAAATCACTGGTGCAGA  
 CCAAACAGCAAATGGCTTGGTTGAAGTTGAACTTAAAACGGTGCAAAAC  
 TTGAATCGAAAACCTGTGATCCTTTCAACAGGGGCACGTTGGAGAGAAATG  
 AATGTACCAGGTGAAGCTGAATACCGTACCCGTGGTGTAGCGTACTGTCC  
 ACACTGTGATGGTCCATTGTTCAAAGGCAAACGTGTTGCCGTGATTGGTG  
 GCGGTAACCTCAGGTGTTGAAGCGGCGATTGACCTTGCAGGTATTGTTGAG  
 CATGTAACCTCTGGTTGAGTTTGACACTAACTTCGTGCTGACCAAGTCTTG  
 CAAAACAAGTTAAACAGCTTGCCAAACACCACTGTGATTATGAATGCATTA  
 AGCACAGAAGTATTGGGTGACGGTTCACAAGTAACCGGTCTTAAATATAAA  
 GACCGTGCAACTGATGGAGAGCATGTGGTAGAGCTTGCAGGGATCTTTGT  
 ACAGATTGGTTTACTTCCAAACACTGACTTCTTAAAAGACAGTGAGGTTGA  
 GTTAACCAATCGTGGAGAGATCATTGTCAATGACCGCAACGAAACCAATG



|                   |                      |             |   |                      |                                                                                                                                                                                                                                                                                                                                                                                                                                                                                                                                                                                                                                                                                                                                                                                                                                                                                                                                                                                                                                                                                                                                                                                                                                                                                                                                                                                                                                                                                                                                                                                                                                                                                                                                    |
|-------------------|----------------------|-------------|---|----------------------|------------------------------------------------------------------------------------------------------------------------------------------------------------------------------------------------------------------------------------------------------------------------------------------------------------------------------------------------------------------------------------------------------------------------------------------------------------------------------------------------------------------------------------------------------------------------------------------------------------------------------------------------------------------------------------------------------------------------------------------------------------------------------------------------------------------------------------------------------------------------------------------------------------------------------------------------------------------------------------------------------------------------------------------------------------------------------------------------------------------------------------------------------------------------------------------------------------------------------------------------------------------------------------------------------------------------------------------------------------------------------------------------------------------------------------------------------------------------------------------------------------------------------------------------------------------------------------------------------------------------------------------------------------------------------------------------------------------------------------|
| <i>group_4253</i> | hypothetical protein | A2, A3, A14 | / | hypothetical protein | <p>TAAAAGGTGATTTGCTGCAGGTGACTGTACCACTGTACCTTACAAGCAGATCATTATTGCTACAGGTGAAGGCGCTAAAGCATCACTCTCTGCGTTTGATTACATCATTCGTTCTGGGCAGTAG</p> <p>ATGTACAAGTTAAAGCTAAATCCTCAGACCAGCGGCTATGGCGTAACACCGGGTGATGATGTGAAACGTCAGCAGATGGATGGCGGTCGTGGTCGCTATTACATCGATGTGAAACGTAACAGCCACATTGTTGATGTGAACTGGAACTTAAGTAAAACCGATTTCAATAAAATGATGGCTTTCTGGCGGGTCTACCAGAACAACCAGCCTCATTTTATGCGGATTTGGTGATTGATCAGGGAACACGTCA</p> <p>GCAATATCTATGCAATTTCACTCCAAACTCGTTCAAGACCAATGAAGTCAACGGCAACTTATATCGTGTGAACGCGCAGCTCGAAGTTGTTCAAACCAGCCTAACCTGAATGCCGATATAGCATTAAATTAAGATTGGGAGGTCTAAATGTACAAGTTAAAGCTAAATCCTCAGACCAGCGGCTATGGCGTAACACCGGGTGATGATGTGAAACGTCAGCAGATGGATGGCGGTCGTGGTCGCTATTACATCGATGTGAAACGTAACAGCCACATTGTTGATGTGAACTGGAACTTAAGTAAAACCGATTTCAATAAAATGATGGCTTTCTGGCGGGTCTACCAGAACAACCAGCCTCATTTTATGCGGATTTGGTGATTGATCAGGGAACACGTCA</p> <p>GCAATATCTATGCAATTTCACTCCAAACTCGTTCAAGACCAATGAAGTCAACGGCAACTTATATCGTGTGAACGCGCAGCTCGAAGTTGTTCAAACCAGCCTAACCTGAATGCCGATATAGCATTAAATTAAGATTGGGAGGTCTAAATGAGTTCAGGTGCAAAAATTCGATTATATGCTTGTGAAGAAGCTGTTTTAGGAACTACTCCGGCAAATCCGGTCTGGTATACCGTTCGCCGTGTTACTGATAGTTTGACCGAAAATGTTACTACTGAAGATAGCAGTGAAGTAGTTGATCACGTTTTCGCCAAGGTGCTGTAGTAACGGAAGCTGAAGTAACTGGTCAGTTAGAATTTGAATTATCGCTAGGTACCTTTGATTTATTCTTAAATGTTCTCGCTTTCAATAACTGGGCTGCAAAATGCTTTAAGTTTTGGTGGTGGAGTCCGTAA</p> <p>GTCTCTTACCTTGGTAAAAGTCTTTGAAGATATTGGTCAAGTCTTTATTTATCGTGGTATTCAAGTGAATACAGGTGAAATGACAATCCAGACCACGGGGAAATCACTGGTAACTTTGGTTTAGTCGGTAGCTCATTTACACGACAGCAGGCAATCCTGTTACCAATCCTATTCCAGCATCGACTCGCCACTGGTGAGTATGCCAAACGTTGAAAACACTATTATTAATGGTCAATCAATTCAGGGTAAAGCTTGTCTGCAGACACTTACCATCAACTTTAGTAATAATCTGGAAGCGATCCGTTGTATCGGATCTGGTAAATACACTCCAGAGTTTTATTTAGAGAAGATGATGGATATCGAAGCGAATGCTTCATTCATGTTCTCGGCCACAGCTGCTGGTT</p> |
| <i>group_4254</i> | hypothetical protein | A2, A3, A14 | / | hypothetical protein | <p>TAAAAGGTGATTTGCTGCAGGTGACTGTACCACTGTACCTTACAAGCAGATCATTATTGCTACAGGTGAAGGCGCTAAAGCATCACTCTCTGCGTTTGATTACATCATTCGTTCTGGGCAGTAG</p> <p>ATGTACAAGTTAAAGCTAAATCCTCAGACCAGCGGCTATGGCGTAACACCGGGTGATGATGTGAAACGTCAGCAGATGGATGGCGGTCGTGGTCGCTATTACATCGATGTGAAACGTAACAGCCACATTGTTGATGTGAACTGGAACTTAAGTAAAACCGATTTCAATAAAATGATGGCTTTCTGGCGGGTCTACCAGAACAACCAGCCTCATTTTATGCGGATTTGGTGATTGATCAGGGAACACGTCA</p> <p>GCAATATCTATGCAATTTCACTCCAAACTCGTTCAAGACCAATGAAGTCAACGGCAACTTATATCGTGTGAACGCGCAGCTCGAAGTTGTTCAAACCAGCCTAACCTGAATGCCGATATAGCATTAAATTAAGATTGGGAGGTCTAAATGAGTTCAGGTGCAAAAATTCGATTATATGCTTGTGAAGAAGCTGTTTTAGGAACTACTCCGGCAAATCCGGTCTGGTATACCGTTCGCCGTGTTACTGATAGTTTGACCGAAAATGTTACTACTGAAGATAGCAGTGAAGTAGTTGATCACGTTTTCGCCAAGGTGCTGTAGTAACGGAAGCTGAAGTAACTGGTCAGTTAGAATTTGAATTATCGCTAGGTACCTTTGATTTATTCTTAAATGTTCTCGCTTTCAATAACTGGGCTGCAAAATGCTTTAAGTTTTGGTGGTGGAGTCCGTAA</p> <p>GTCTCTTACCTTGGTAAAAGTCTTTGAAGATATTGGTCAAGTCTTTATTTATCGTGGTATTCAAGTGAATACAGGTGAAATGACAATCCAGACCACGGGGAAATCACTGGTAACTTTGGTTTAGTCGGTAGCTCATTTACACGACAGCAGGCAATCCTGTTACCAATCCTATTCCAGCATCGACTCGCCACTGGTGAGTATGCCAAACGTTGAAAACACTATTATTAATGGTCAATCAATTCAGGGTAAAGCTTGTCTGCAGACACTTACCATCAACTTTAGTAATAATCTGGAAGCGATCCGTTGTATCGGATCTGGTAAATACACTCCAGAGTTTTATTTAGAGAAGATGATGGATATCGAAGCGAATGCTTCATTCATGTTCTCGGCCACAGCTGCTGGTT</p>                                                                                                                                                                                                                                                                                                                                                                                                                      |
| <i>group_4286</i> | hypothetical protein | A2, A3, A14 | / | hypothetical protein | <p>TAAAAGGTGATTTGCTGCAGGTGACTGTACCACTGTACCTTACAAGCAGATCATTATTGCTACAGGTGAAGGCGCTAAAGCATCACTCTCTGCGTTTGATTACATCATTCGTTCTGGGCAGTAG</p> <p>ATGTACAAGTTAAAGCTAAATCCTCAGACCAGCGGCTATGGCGTAACACCGGGTGATGATGTGAAACGTCAGCAGATGGATGGCGGTCGTGGTCGCTATTACATCGATGTGAAACGTAACAGCCACATTGTTGATGTGAACTGGAACTTAAGTAAAACCGATTTCAATAAAATGATGGCTTTCTGGCGGGTCTACCAGAACAACCAGCCTCATTTTATGCGGATTTGGTGATTGATCAGGGAACACGTCA</p> <p>GCAATATCTATGCAATTTCACTCCAAACTCGTTCAAGACCAATGAAGTCAACGGCAACTTATATCGTGTGAACGCGCAGCTCGAAGTTGTTCAAACCAGCCTAACCTGAATGCCGATATAGCATTAAATTAAGATTGGGAGGTCTAAATGAGTTCAGGTGCAAAAATTCGATTATATGCTTGTGAAGAAGCTGTTTTAGGAACTACTCCGGCAAATCCGGTCTGGTATACCGTTCGCCGTGTTACTGATAGTTTGACCGAAAATGTTACTACTGAAGATAGCAGTGAAGTAGTTGATCACGTTTTCGCCAAGGTGCTGTAGTAACGGAAGCTGAAGTAACTGGTCAGTTAGAATTTGAATTATCGCTAGGTACCTTTGATTTATTCTTAAATGTTCTCGCTTTCAATAACTGGGCTGCAAAATGCTTTAAGTTTTGGTGGTGGAGTCCGTAA</p> <p>GTCTCTTACCTTGGTAAAAGTCTTTGAAGATATTGGTCAAGTCTTTATTTATCGTGGTATTCAAGTGAATACAGGTGAAATGACAATCCAGACCACGGGGAAATCACTGGTAACTTTGGTTTAGTCGGTAGCTCATTTACACGACAGCAGGCAATCCTGTTACCAATCCTATTCCAGCATCGACTCGCCACTGGTGAGTATGCCAAACGTTGAAAACACTATTATTAATGGTCAATCAATTCAGGGTAAAGCTTGTCTGCAGACACTTACCATCAACTTTAGTAATAATCTGGAAGCGATCCGTTGTATCGGATCTGGTAAATACACTCCAGAGTTTTATTTAGAGAAGATGATGGATATCGAAGCGAATGCTTCATTCATGTTCTCGGCCACAGCTGCTGGTT</p>                                                                                                                                                                                                                                                                                                                                                                                                                      |



|                   |                                                                      |                 |   |                                                             |                                                                                                                                                                                                                                                                                                                                                                                                                                                                                                                                                                                                                                                                                                                                                                                                                                                                                                                       |
|-------------------|----------------------------------------------------------------------|-----------------|---|-------------------------------------------------------------|-----------------------------------------------------------------------------------------------------------------------------------------------------------------------------------------------------------------------------------------------------------------------------------------------------------------------------------------------------------------------------------------------------------------------------------------------------------------------------------------------------------------------------------------------------------------------------------------------------------------------------------------------------------------------------------------------------------------------------------------------------------------------------------------------------------------------------------------------------------------------------------------------------------------------|
| <i>group_4699</i> | hypothetical protein                                                 | C2, C6          | / | hypothetical protein                                        | <p>ATGTCTGCTGAAACTGTGCCTGTACCTGGCAATGAAGTGTTGCCTGCAGG<br/> GTCAGTTGCTGTTGCAGTCACTGTATCGCCATCCACCAGGTTACCTGGGT<br/> TTGGTACTGACCAGCTGCCATCTGTGCCTGCTACCACTGTTGCAGTTGTG<br/> CCATCAGGATAA</p> <p>ATGCCACCCTTAGCAAGTTTGCCTCATTCTGAGTTGGTTATTCATGTAGGT<br/> TCATTGTCTAAAGTTTTTGCACCCGGTATTCGGTTAGGTTACATCGTGGCA<br/> GCTCCAACATCATTCAAACCATTACTGAAGATATTTTATTGATTGATCGGC<br/> AGGGCAATAATATTACGGAACCTCGCTTTAGCCGATTTAATGCAACGAGGG<br/> GAAATCAAGCGACACATCCGTAAAATGAAAAGATTTATCAGTTACGTGCA<br/> GACCATGCGTTAGCTGAGTTTCAAAGAGTTTTTGTGAGAGTATTCAGATA<br/> CAACCGCCCGCGGGTGAATGGCTTTGTGGTAAAATTTCAGAAATCATT<br/> TACTCAAAATCAGCTCATAAAGCTAAAAGAACTCAACATTGATACAGAGCA<br/> GAAGTTTAAACAGAAAGAATATCCTAATTGTAGTATCCGCTTTGGTTTTGC<br/> AGCTTTATCAGAGAAAGAAATCACCTCTCTAATTGAGACCTTAAATGAAGC<br/> TCTTAATAAAAAGAACAGCGGACTTATAA</p>                                                                                                 |
| <i>group_47</i>   | <i>gabR_3</i><br>HTH-type transcriptional regulatory protein<br>GabR | C4, C6          | K | helix_turn_helix gluconate operon transcriptional repressor | <p>ATGTCTGCTGAAACTGTGCCTGTACCTGGCAATGAAGTGTTGCCTGCAGG<br/> GTCAGTCGCTGTTGCAGTCACTGTATCGCCATCCACCAGGTTACCTGGGT<br/> TTGGTACTGACCAGCTGCCATCTGTGCCTGCTACCACTGTTGCAGTTGTG<br/> CCATCAGGATAA</p> <p>ATGTCTGCTGAAACTGTGCCTGTACCTGGCAATGAAGTGTTGCCTGCAGG<br/> GTCAGTCGCTGTTGCAGTCACTGTATCGCCATCCACCAGGTTACCTGGGT<br/> TTGGTACTGACCAGCTGCCATCTGTGCCTGCTACCACTGTTGCAGTTGTG<br/> CCATCAGGATAA</p> <p>ATGCCACCCTTAGCAAGTTTGCCTCATTCTGAGTTGGTTATTCATGTAGGT<br/> TCATTGTCTAAAGTTTTTGCACCCGGTATTCGGTTAGGTTACATCGTGGCA<br/> GCTCCAACATCATTCAAACCATTACTGAAGATATTTTATTGATTGATCGGC<br/> AGGGCAATAATATTACGGAACCTCGCTTTAGCCGATTTAATGCAACGAGGG<br/> GAAATCAAGCGACACATCCGTAAAATGAAAAGATTTATCAGTTACGTGCA<br/> GACCATGCGTTAGCTGAGTTTCAAAGAGTTTTTGTGAGAGTATTCAGATA<br/> CAACCGCCCGCGGGTGAATGGCTTTGTGGTAAAATTTCAGAAATCATT<br/> TACTCAAAATCAGCTCATAAAGCTAAAAGAACTCAACATTGATACAGAGCA<br/> GAAGTTTAAACAGAAAGAATATCCTAATTGTAGTATCCGCTTTGGTTTTGC</p> |
| <i>group_4701</i> | hypothetical protein                                                 | L7, L8, L9, L10 | / | hypothetical protein                                        | <p>ATGTCTGCTGAAACTGTGCCTGTACCTGGCAATGAAGTGTTGCCTGCAGG<br/> GTCAGTCGCTGTTGCAGTCACTGTATCGCCATCCACCAGGTTACCTGGGT<br/> TTGGTACTGACCAGCTGCCATCTGTGCCTGCTACCACTGTTGCAGTTGTG<br/> CCATCAGGATAA</p> <p>ATGTCTGCTGAAACTGTGCCTGTACCTGGCAATGAAGTGTTGCCTGCAGG<br/> GTCAGTCGCTGTTGCAGTCACTGTATCGCCATCCACCAGGTTACCTGGGT<br/> TTGGTACTGACCAGCTGCCATCTGTGCCTGCTACCACTGTTGCAGTTGTG<br/> CCATCAGGATAA</p>                                                                                                                                                                                                                                                                                                                                                                                                                                                                                                                               |
| <i>group_4702</i> | hypothetical protein                                                 | L6, L8, L9, L10 | / | hypothetical protein                                        | <p>ATGTCTGCTGAAACTGTGCCTGTACCTGGCAATGAAGTGTTGCCTGCAGG<br/> GTCAGTCGCTGTTGCAGTCACTGTATCGCCATCCACCAGGTTACCTGGGT<br/> TTGGTACTGACCAGCTGCCATCTGTGCCTGCTACCACTGTTGCAGTTGTG<br/> CCATCAGGATAA</p> <p>ATGCCACCCTTAGCAAGTTTGCCTCATTCTGAGTTGGTTATTCATGTAGGT<br/> TCATTGTCTAAAGTTTTTGCACCCGGTATTCGGTTAGGTTACATCGTGGCA<br/> GCTCCAACATCATTCAAACCATTACTGAAGATATTTTATTGATTGATCGGC<br/> AGGGCAATAATATTACGGAACCTCGCTTTAGCCGATTTAATGCAACGAGGG<br/> GAAATCAAGCGACACATCCGTAAAATGAAAAGATTTATCAGTTACGTGCA<br/> GACCATGCGTTAGCTGAGTTTCAAAGAGTTTTTGTGAGAGTATTCAGATA<br/> CAACCGCCCGCGGGTGAATGGCTTTGTGGTAAAATTTCAGAAATCATT<br/> TACTCAAAATCAGCTCATAAAGCTAAAAGAACTCAACATTGATACAGAGCA<br/> GAAGTTTAAACAGAAAGAATATCCTAATTGTAGTATCCGCTTTGGTTTTGC</p>                                                                                                                                                                                             |
| <i>group_48</i>   | <i>gabR_3</i><br>HTH-type transcriptional regulatory protein<br>GabR | C2, C6          | K | helix_turn_helix gluconate operon transcriptional repressor | <p>ATGTCTGCTGAAACTGTGCCTGTACCTGGCAATGAAGTGTTGCCTGCAGG<br/> GTCAGTCGCTGTTGCAGTCACTGTATCGCCATCCACCAGGTTACCTGGGT<br/> TTGGTACTGACCAGCTGCCATCTGTGCCTGCTACCACTGTTGCAGTTGTG<br/> CCATCAGGATAA</p> <p>ATGCCACCCTTAGCAAGTTTGCCTCATTCTGAGTTGGTTATTCATGTAGGT<br/> TCATTGTCTAAAGTTTTTGCACCCGGTATTCGGTTAGGTTACATCGTGGCA<br/> GCTCCAACATCATTCAAACCATTACTGAAGATATTTTATTGATTGATCGGC<br/> AGGGCAATAATATTACGGAACCTCGCTTTAGCCGATTTAATGCAACGAGGG<br/> GAAATCAAGCGACACATCCGTAAAATGAAAAGATTTATCAGTTACGTGCA<br/> GACCATGCGTTAGCTGAGTTTCAAAGAGTTTTTGTGAGAGTATTCAGATA<br/> CAACCGCCCGCGGGTGAATGGCTTTGTGGTAAAATTTCAGAAATCATT<br/> TACTCAAAATCAGCTCATAAAGCTAAAAGAACTCAACATTGATACAGAGCA<br/> GAAGTTTAAACAGAAAGAATATCCTAATTGTAGTATCCGCTTTGGTTTTGC</p>                                                                                                                                                                                             |

*group\_49*    *gabR\_3*    HTH-type  
 optional regulatory protein  
 GabR

L7, L8, L9, L10

K    helix\_turn\_helix gluconate operon transcriptional repressor

*group\_5*    *pcal\_2*    hypothetical protein

L6, L7, L10

I    3-oxoadipate CoA-transferase activity

*group\_50*    *gabR\_3*    HTH-type  
 optional regulatory protein  
 GabR

L6, L7, L8, L10

K    helix\_turn\_helix gluconate operon transcriptional repressor

AGCTTTATCAGAGAAAGAAATCACCTCTCTAATTGAGACCTTAAATGAAGC  
 TCTTAATAAAAAGAACAGCGGACTTATAA  
 ATGCCACCCTTAGCAAGTTTGCCTCATTCTGAGTTGGTTATTCATGTAGGT  
 TCATTGTCTAAAGTTTTTGCACCCGGTATTCGGTTAGGTTACATCGTGGCA  
 GCTCCAACATCATTCAAACCATTACTGAAGATATTTTATTGATTGATCGGC  
 AGGGCAATAATATTACGGAACCTCGCTTTAGCCGATTTAATGCAACGAGGG  
 GAAATCAAGCGACACATCCGTAAAATGAAAAGATTTATCAGTTACGTCTGA  
 GACCATGCGTTAGCTGAGTTTCAAAGAGTTTTTGTCTGAGAGTATTCAGATA  
 CAACCGCCCGCGGGTGAATGGCTTTGTGGGTAAAATTTTCAGAAATCATT  
 TACTCAAAATCAGCTCATAAAGCTAAAAGAACTCAACATTGATACAGAGCA  
 GAAGTTTAAACAGAAAGAATATCCTAATTGTAGTATCCGCTTTGGTTTTGC  
 AGCTTTATCAGAGAAAGAAATCACCTCTCTAATTGAGACCTTAAATGAAGC  
 TCTTAATAAAAAGAACAGCGGACTTATAA  
 ATGATTGACAAAAGTAAGTCCTCACTAAGCGAGGTTTTATCGCAAATTTAAA  
 GATGGTGCAACCATTCTGATTGGTGGTTTTGGTACCGCAGGACAACCCGC  
 TGAATCATTGACGGTCTGATTGATCTTGGCGTTAAGGACCTGACCATTGT  
 GAGCAACAATGCCGGTAATGGCGATTATGGTCTGGCTAACTGCTCAAAG  
 CCGGTTCTATTAATAAAGTGATTTGCTCTTTCCACGTCAGTCTGACTCTT  
 ATGTGTTTGTGAACTGTACCGTGCCGNNNNNNNNNGCCAATAAAGTTG  
 TGTCCAATGACCATTTTTATATTCCTTAGAGAGTAA  
 ATGCCACCCTTAGCAAGTTTGCCTCATTCTGAGTTGGTTATTCATGTAGGT  
 TCATTGTCTAAAGTTTTTGCACCCGGTATTCGGTTAGGTTACATCGTGGCA  
 GCTCCAACATCATTCAAACCATTACTGAAGATATTTTATTGATTGATCGGC  
 AGGGCAATAATATTACGGAACCTCGCTTTAGCCGATTTAATGCAACGAGGG  
 GAAATCAAGCGACACATCCGTAAAATGAAAAGATTTATCAGTTACGTCTGA  
 GACCATGCGTTAGCTGAGTTTCAAAGAGTTTTTGTCTGAGAGTATTCAGATA  
 CAACCGCCCGCGGGTGAATGGCTTTGTGGGTAAAATTTTCAGAAATCATT  
 TACTCAAAATCAGCTCATAAAGCTAAAAGAACTCAACATTGATACAGAGCA  
 GAAGTTTAAACAGAAAGAATATCCTAATTGTAGTATCCGCTTTGGTTTTGC  
 AGCTTTATCAGAGAAAGAAATCACCTCTCTAATTGAGACCTTAAATGAAGC  
 TCTTAATAAAAAGAACAGCGGACTTATAA

group\_  
54

hypothetical  
protein

A2, A3,  
A14

D

Phage-related minor tail protein

ATGGCACAAGAATCACGTCTCGTCATTGTAATTGATGCAAAAAATGCAGAA  
CGAAATGCGCGCAATCTAGGCAATGAACTGGATAGTATTGAGCGTAAAGG  
TGAGTTTGCATCTAAGTCTATGGACAACCTTATCTGTAGCTACGCGAGCACT  
AGCTGGGTATATGGCTGGGCTAGTAACAGTAAGTTCTGCCATTTCAAAGA  
TGGATACATATACTGGACTACAAAACCGTCTTAAGTTGGTCACTAATAATC  
AAGTTGAACTAAATAAAGCAACGGAAGACACTTTCCGAATTGCTCAAAAA  
CCTATTCGGCTTGGGATTCTGTGTTACAGGTCTACCAGCGTTTTAGTGATA  
ATGCCAAAACCTTTAAACCTCACAATGGATGACACAGCACGTTTAACTGAAA  
CAGTTTCTAAAGCTGTAGCAATTAGTGGTGCAAGTGCAAGAAGCAGCTGAT  
GCAGCTTTAGTACAATTCGGGCAGGCTTTGGCAAGCGGTACATTACGTGG  
TGAAGAACTCAACTCAGTTATGGAACAAACACCAGCTCTAGCAAAGGCTAT  
TGCTCAAGGCATGGGGATCACCGTAGGAGAGTTGCGTTCAGTAGCAGCT  
GAAGGAAAAATTACTTCACAAGAAATTGAAAAGCGCTTAGAAATGTAGAA  
TCTGATGTTGATGCTCTTTTTGCTAAAACAGATATCACAATCGGGCAGTCT  
CTCACACTCCTAAACAACGAGATCACAAAATTTGTTGGCGAAGCAGGTAA  
GGGAAGTGGTGCGGCACAGGTATTAGCTGGATCAGTTCAAACCTTTGCAA  
GTAATTTAGATTTAATTGCTGATGGGGCTTTAGTAGTTGGTATTGGATATAT  
CACTCGTGCAATTTTATGATGAAGAGCGCTGCTATTAAGAGGGAATGGCTT  
CAACTTTAGCGAGCCGCCAAGCATCTGTATTAATGCTCAAGCAGAATATG  
CAGAAGCTACCGCTGCTTTGAATGCAGCAAAAGCTCATCTCGCGAATGTG  
CGAGCAACAAATGCAGAAACCCAAGCTAAATTTGGCGAACAGCGGCAG  
CAACTCGATACGCACAAGCACAGGCAGCAGTAACTGCTGCTACAAATGCA  
CAAACAGCAGCTCAAATTAAGCTAAATACTGCAACTTCAATTGCAGGGAGA  
CTAGCTAAAGGGGCGTTTGGATTAATTGGTGGGTGGGCTGGAGTTGCAAC  
ATTAGGAGTAATGGGATTAGCGGCAGCCTATTCTTATTTTAATAATAAGGC  
AGAGGAGGCAAAGCAAAAGCTTGCTGAACAAGCTAAAGTTGCTGAGAAAG  
CTGATGAGGAGTTAAAAAATTAACCTGGCAATGATAAGGCTAAAGCAGTTA  
ATGATTTAACTACTGCTTTTAAATGCACAAAATAAAGCATTAGAGAAATCATC  
GCGTGCTGTAGGGTCTGCATTAATTGATATCGAGAACTATGCACGAGGAA  
ATAGGGAGGTTGAAAAATTTCCCAAGAAGCGAGAAGTGGAACTATCAGC  
TATACAGAAGCCATTGAACGTCTAAATAAAATTAAGTTGCCTACAGATCTAT  
ATGAAAATCTGAAAAACAGGCTGCGCAGTATGATGACAATGCATCTAAAG  
CAAGTTTATCAGCTGAGAACTTAAATTATTAAGAGTTGAAGTGAACTTG

GAGGTAATGAAGCACAAAATGCGGCAATTCAGCATCAAAAACAAGCGGAT  
GCTTTAGGAAATACTGCTACTGAAGCAGAAAAGGCAACTAAGGCTTTGCA  
AGATTATCAAGCCAAGCAAAAAGATAGCGTTATTGATTCAATCTATAAATCA  
GGTTGGCTTGATAAAGGTTACTGTTGCTCAAGCTAATGCCATTTTAGAA  
CTGCAAAAAGCTAAAGGAATGAGTGCAATTTTGTCTAAAGATGAAATTGAT  
AGCGCACTTAGAAATCTCAAGATCATCGAAGAACAACAGGAGCGAGAAGA  
TAAATTAAGTGAAGCTAAAAGAAAGCAGACGCAGGAAATTGAAAAACAAGC  
AAAACCTACTAAACGCTTGGTCGGTATTTCCGGTCAATCCGGTATTGGTAC  
TGGTCCACATCTTGACGTCGGATATGGTGGCTCATTGTCAGGTCAGAAAG  
TTTCTAATGAACATCTGGCTCGATTACAGGCGGGAGGAAAACCTTTAACTT  
CCTACAAGATCAGTTCTAATTATGGTCCACGAAAAGCCCCAACTAAAGGG  
GCTTCTTCATTTATAAAGGTATTGATTTTTCAATGCCTGAAGGAACACCAA  
TCACGACCAATGTTGCTGTGAAAGATATCAAGACATGGTATGACAGCAAG  
GGAGGTGGTTATGTCAGTGAAGTATCTTTGAGGATGGAGTGTCTCTTAA  
GCTTCTACATCAATCTCCAAGATGCAGAGCAAGGTGAAAGGTGGTGCAA  
GTAAAGGAAGTGATAAAGCAGCTGGTATCAATCTCAACTTGAACGTC  
AACAGGATTTGCAACGGTCACTTGAAAATGAGGTGGCTAGTGAAGTCGGA  
CGGATTAACAATAATAGAAAGGCAAGACTGGAGGATGTTGATAAAGCAAA  
CTTTAGCCCCGGAACGTAAGTGCAGAAATAAAGGCGGAAATAAATCGTCGTG  
CAGATAATGATATTGCTATAGCCAAACAAGCCCTTAGAACGAAATTGGAAG  
ACTATAAGGAGTTCCAGAAAACCGAGGAACAGTTACTAGAAGAGTCCTTTA  
ACCGTAAAAAGTTCAATGCAGCTCATGACCTTGAATTAAGTAAGTTTGAGC  
AGAAGCAAGCTGTTGAATTGCTGGAACAGCAAAAACAGCAAGAGTTAGGG  
TTATTA AAACTAGCTCAGGAACAGCGGTTGTTTCAAGCCCGTTTATCTCTG  
CTTTCTGAAACGCAAGCCATGCAGGAACGTTACAGACTCGAACGGGAGGA  
AATTCTTAAGAATACCAAGCTTTCTATAGAAGAGCGGCAAAAAGCTAATCGC  
ATTATCTAAAGCCAATCAGGATAAAGAGACACGCGATAAAGTGAATAATGC  
TGCTCAAACTGGGGTGGTATCCAAGCGGATATGAATGGTACCGGAGAAT  
TTTTCAGACAGGATCAGGAACGATTTAGCCGCTTAAATGCTGCAAATGATT  
TAGCAGATAGTCAATTTGCTGCTACCGACCTGAATGAGCAAACTCTTTAG  
ATGGTTTGAATGCTCAATTCGAAGCTGGACTAATTAAGCAGCAGGATTACG  
AAAATCAAAAACGGCTATCATTCAAGCTGCTCAGGACCAACGTAATCAGA  
TAGCTGCCGAATATGCTCAGAATGCTCAAGATATTGAAGATAAGTATCACC

group\_  
55

hypoth  
etical  
protein

A2, A3,  
A14

D

Phage-related minor tail protein

AAGATCGATTGAATGCTCAAATTGCCCTTGGTGGCCAAATGATGGGTTCA  
CTCACATCGATGTTTGGCTCAATGTTTGGAGAGCAATCTAAAGCCTACAAA  
ATCATGTTTGGCTGCTGATAAAGCTTATGCCATTGCAGCTGCAGGTATTGCG  
ATTCAGCAAATATTGCAGCAGCTTCAAAGCTGGTTTTCCACTTAACATT  
CCATTAATTGCTGGGGCGGTTGCTCAAGGCGCTAGCATTATTGCAAACAT  
CCGGGCAATTAAGGATCAAGGCTTTGCTGATGGTGGTTACACTGGTTCGAG  
GTGGGAAATATGAAGTTGCTGGAGCTGTGCACAAAGGCGAGATTGTATGG  
TCCCAAGAAGACATTAACGTTGGGGTGGTGGTTAGTTGAGAGAAT  
GCGTAAGAGTGCAAACCCTGAAGCTTTTCTCAATAACAATGCCTCGACTG  
ATAGTGTTCATGCGCCGTGCAATGATGAGCTCTAATGCCTTTATAGAAAGC  
CAAAGCAGGCTGACATCTTTAATCAACCGGTTCAAGATACTCAGATTATC  
TATAAGGGTAATAGAGACACACCTAAATTAGCTTCTTCTGGAAATTCAGAC  
TTATTCCATGATGGCAAGGTCTACTTCTCATCCAATGGTTTAGTTCAGGAT  
CGTTCAAATCTGGATGATGTTTCAGGACTTTACTTTAGGAAGTACTTCACGC  
CCTCAAGCTGAGATTATGCCTTCAATTGAGCCTGCTTCACCGACAATCAAT  
TTCAAATTGAAGTGATTAATCAGGTGAGTGGGGCGACAGTTGAAGCCGA  
ACAACCTGGACGAGCAAACAGTCCGGATCATTGTTAAAGATGAACTGGATA  
AGCAGCTTCCAAGAACGGTACCTAAGCTTGTAAGTGATCAAATCGCAAAT  
CCAAACTCAACCATTAGTCGGTCTTTGACTGAGAATACGACAGCGAGAAG  
AAATCGTACTTAA  
ATGGCACAAGAATCACGTCTCGTCATTGTAATTGATGCAAAAAATGCAGAA  
CGAAATGCGCGCAATCTAGGCAATGAACTGGATAGTATTGAGCGTAAAGG  
TGAGTTTGCATCTAAGTCTATGGACAACCTTATCTGTAGCTACGCGAGCACT  
AGCTGGGTATATGGCTGGGCTAGTAACAGTAAGTTCTGCCATTTCAAAGA  
TGGATACATATACTGGACTACAAAACCGTCTTAAGTTGGTCACTAATAATC  
AAGTTGAACTAAATAAAGCAACGGAAGACACTTTCCGAATTGCTCAAAAAA  
CCTATTCGGCTTGGGATTCTGTGTTACAGGTCTACCAGCGTTTTAGTGATA  
ATGCCAAAACCTTAAACCTCACAATGGATGACACAGCACGTTTAACTGAAA  
CAGTTTCTAAAGCTGTAGCAATTAGTGGTGAAGTGCAGAAGCAGCTGAT  
GCAGCTTTAGTACAATTCGGGCAGGCTTTGGCAAGCGGTACATTACGTGG  
TGAAGAACTCAACTCAGTTATGGAACAAACACCAGCTCTAGCAAAGGCTAT  
TGCTCAAGGCATGGGGATCACCGTAGGAGAGTTGCGTTTCAGTAGCAGCT  
GAAGGAAAAATTACTTCACAAGAAATTGTAAGGCGCTTAGAAATGTAGAA

TCTGATGTTGATGCTCTTTTTGCTAAAACAGATATCACAATCGGGCAGTCT  
CTCACACTCCTAAACAACGAGATCACAAAATTTGTTGGCGAAGCAGGTAA  
GGGAAGTGGTGCGGCACAGGTATTAGCTGGATCAGTTCAAACTCTTGCAA  
GTAATTTAGATTTAATTGCTGATGGGGCTTTAGTAGTTGGTATTGGATATAT  
CACTCGTGCAATTTTATGAAGAGCGCTGCTATTAAGAGGGGAATGGCTT  
CAACTTTAGCGAGCCGCCAAGCATCTGTATTAATGCTCAAGCAGAATATG  
CAGAAGCTACCGCTGCTTTGAATGCAGCAAAGCTCATCTCGCGAATGTG  
CGAGCAACAAATGCAGAAACCCAAGCTAAATTTGGCGCAACAGCGGCAG  
CAACTCGATACGCACAAGCACAGGCAGCAGTAACTGCTGCTACAAATGCA  
CAAACAGCAGCTCAAATTAAGCTAAATACTGCAACTTCAATTGCAGGGAGA  
CTAGCTAAAGGGGCGTTTGGATTAATTGGTGGGTGGGCTGGAGTTGCAAC  
ATTAGGAGTAATGGGATTAGCGGCAGCCTATTCTTATTTTAATAATAAGGC  
AGAGGAGGCAAAGCAAAGCTTGCTGAACAAGCTAAAGTTGCTGAGAAAG  
CTGATGAGGAGTTAAAAAATTAAGTGGCAATGATAAGGCTAAAGCAGTTA  
ATGATTTAACTACTGCTTTTAATGCACAAAATAAAGCATTAGAGAAATCATC  
GCGTGCTGTAGGGTCTGCATTAATTGATATCGAGAACTATGCACGAGGAA  
ATAGGGAGGTTGAAAAATTTCCCAAGAAGCGAGAAGTGGAACTATCAGC  
TATACAGAAGCCATTGAACGTCTAAATAAAATTAAGTTGCCTACAGATCTAT  
ATGAAAATCTGAAAAACAGGCTGCGCAGTATGATGACAATGCATCTAAAG  
CAAGTTTATCAGCTGAGAACTTAAATTATTAAGAGTTGAAGTGAAGCTTG  
GAGGTAATGAAGCACAAAATGCGGCAATTCAGCATCAAAAACAAGCGGAT  
GCTTTAGGAAATACTGCTACTGAAGCAGAAAAGGCAACTAAGGCTTTGCA  
AGATTATCAAGCCAAGCAAAGATAGCGTTATTGATTCAATCTATAAATCA  
GGTTGGCTTGATAAAGGTTACACTGTTGCTCAAGCTAATGCCATTTTAGAA  
CTGCAAAAAGCTAAAGGAATGAGTGCAATTTTGTCTAAAGATGAAATTGAT  
AGCGCACTTAGAAATCTCAAGATCATCGAAGAACAACAGGAGCGAGAAGA  
TAAATTAAGTGAAGCTAAAAGAAAGCAGACGCAGGAAATTGAAAAACAAGC  
AAAACCTACTAAACGCTTGGTCGGTATTTCCGGTCAATCCGGTATTGGTAC  
TGGTCCACATCTTGACGTCCGATATGGTGGCTCATTGTCAGGTCAGAAAG  
TTTCTAATGAACATCTGGCTCGATTACAGGCGGGAGGAAAACCTTTAACTT  
CCTACAAGATCAGTTCTAATTATGGTCCACGAAAAGCCCCAACTAAAGGG  
GCTTCTTCATTTCATAAAGGTATTGATTTTTCAATGCCTGAAGGAACACCAA  
TCACGACCAATGTTGCTGTGAAAGATATCAAGACATGGTATGACAGCAA



GGAGGTGGTTATGTCAGTGAAGTGATCTTTGAGGATGGAGTGTCTCTTAA  
GCTTCTACATCAATCTCCCAAGATGCAGAGCAAGGTGAAAGGTGGTGCAA  
GTAAAGGAAGTGATAAAGCAGCTGGTGATATTCAATCTCAACTTGAACGTC  
AACAGGATTTGCAACGGTCACCTGAAAATGAGGTGGCTAGTGAAGTCGGA  
CGGATTAACAATAATAGAAAGGCAAGACTGGAGGATGTTGATAAAGCAAA  
CTTTAGCCCGGAACGTA CTGCAGAAATAAAGGCGGAAATAAATCGTCGTG  
CAGATAATGATATTGCTATAGCCAAACAAGCCCTTAGAACGAAATTGGAAG  
ACTATAAGGAGTTCCAGAAAACCGAGGAACAGTTACTAGAAGAGTCCTTTA  
ACCGTAAAAAGTTCAATGCAGCTCATGACCTTGAATTAAGTAAGTTTGAGC  
AGAAGCAAGCTGTTGAATTGCTGGAACAGCAAAAACAGCAAGAGTTAGGG  
TTATTA AAACTAGCTCAGGAACAGCGGTTGTTTCAAGCCCGTTTATCTCTG  
CTTTCTGAAACGCAAGCCATGCAGGAACGTTACAGACTCGAACGGGAGGA  
AATTCTTAAGAATACCAAGCTTTCTATAGAAGAGCGGCAAAAGCTAATCGC  
ATTATCTAAAGCCAATCAGGATAAAGAGACACGCGATAAAGTGAATAATGC  
TGCTCAAAACTGGGGTGGTATCCAAGCGGATATGAATGGTACCGGAGAAT  
TTTTCAGACAGGATCAGGAACGATTTAGCCGCTTAAATGCTGCAAATGATT  
TAGCAGATAGTCAATTTGCTGCTACCGACCTGAATGAGCAAAACTCTTTAG  
ATGGTTTGAATGCTCAATTCGAAGCTGGACTAATTAAGCAGCAGGATTACG  
AAAATCAAAAACCGGCTATCATTCAAGCTGCTCAGGACCAACGTAATCAGA  
TAGCTGCCGAATATGCTCAGAATGCTCAAGATATTGAAGATAAGTATCACC  
AAGATCGATTGAATGCTCAAATTGCCCTTGGTGGCCAAATGATGGGTTCA  
CTCACATCGATGTTTGGCTCAATGTTTGGAGAGCAATCTAAAGCCTACAAA  
ATCATGTTTGCTGCTGATAAAGCTTATGCCATTGCAGCTGCAGGTATTGCG  
ATTCAGCAAAATATTGCAGCAGCTTCAAAAGCTGGTTTTCCACTTAACATT  
CCATTAATTGCTGGGGCGGTTGCTCAAGGCGCTAGCATTATTGCAAACAT  
CCGGGCAATTAAGGATCAAGGCTTTGCTGATGGTGGTTACACTGGTCGAG  
GTGGGAAATATGAAGTTGCTGGAGCTGTGCACAAAGGCGAGATTGTATGG  
TCCCAAGAAGACATTAACGTTGGGGTGGTGGTTAGTTGAGAGAAT  
GCGTAAGAGTGCAAACCCTGAAGCTTTTCTCAATAACAATGCCTCGACTG  
ATAGTGTCATGCGCCGTGCAATGATGAGCTCTAATGCCTTTATAGAAAGC  
CAAAAGCAGGCTGACATCTTTAATCAACCGGTTCAAGATACTCAGATTATC  
TATAAGGGTAATAGAGACACACCTAAATTAGCTTCTTCTGGAAATTCAGAC  
TTATTCCATGATGGCAAGGTCTACTTCTCATCCAATGGTTTAGTTTCAGGAT

group\_  
57

hypothetical  
protein

A2, A3,  
A14

/

hypothetical protein

CGTTCAAATCTGGATGATGTTTCAGGACTTTACTTTAGGAAGTACTTCACGC  
CCTCAAGCTGAGATTATGCCTTCAATTGAGCCTGCTTCACCGACAATCAAT  
TTCAAATTGAAGTGATTAATCAGGTGAGTGGGGCGACAGTTGAAGCCGA  
ACAACGGACGAGCAAACAGTCCGGATCATTGTTAAAGATGAACTGGATA  
AGCAGCTTCCAAGAACGGTACCTAAGCTTGTAAGTGATCAAATCGCAAAT  
CCAACTCAACCATTAGTCGGTCTTTGACTGAGAATACGACAGCGAGAAG  
AAATCGTACTTAA

ATGAATAATCTAATCACTGCAGCTGAAGCATTGTCAGCTCTTCAAAAAGGT  
AAAACGTCTTTGTCGTCTATTGGAGACATGTTGGACTTTTCTGACTTA  
GATCAATCCCCGCTTCTGTTTTTGGTAAACCGGGTTTTGAATTCTGCATC  
AAAATCGAACTATTGAGCTGGCTGGCATTACATTCACAAAGCCATTA  
ATTGATGAGTATGAAGAGGGTCAGGAAGTTTATGTAATCAGTACATATTCA  
CCTACGGTTTATGTTTAGATTTCAAACTAACGCATTAATTGATTCTATTA  
ACAGTGGCTTCGTTCAACGTGATGCAGAAAACGCCAAGCTTCAATTA  
GCACTGTCCAAAGCGTTAGGTTTTGAAGTTAATGATGACTTAAGTGTATT  
CGTCTTGGTGAGGAACCTAAAAACAGAGAGGCCAAAAAATCAAAAGCTGA  
AAAGCCTAGTGAAGTTATTTCTGCAGAACTCAACCAACAATTGTTATTAC  
CGAAAAACAAATGTCATCACATCTGAAGATCTGTTAGTTCCAGAACTAA  
CGAGCCTAAAGTAGATCCTGAATATCAAATAAACTTAATACCCTGCTGCA  
AAGAGTTAAAGACTCAAAACACCAGATGAAGTAAATGCGGTTTATCGTTA  
TACCCGCACATGGGATGACGAACAAATGAAGCCTATCCTTCTCGCCACTC  
ACAAACGTCTTGAAGAGCTAGAAAAAAGGCATCTGCTAATGAGCCA  
CCCTCTTAATGGTTCTAATCCAACTGCACCAGACCTTACAACGCTAGAT  
GCTTTGAAATAGACGTGGCTGCACGAGATCCGCAGATTCAACCGAAGCT  
AATGGGCTATATAAGAAAACGCCGCTATGAATTAGAAAATCCAGCAGTTTC  
TCAACCAGAAGCAGAGCCTGATTTTCTATTAGGAGACGGTTTCTAG

group\_  
58

hypothetical  
protein

A1

/

hypothetical protein

ATGTTGGACTTTTCTGACTTAGATCAATCCCCGCTTCTGTTTTTGGTAAAC  
CGGGTTTTGAATTCTGCATCAAATCGAACTATTGAGCTGGCTGGCATT  
CATTACAAAGCCATTA  
ACTATTGATGAGTATGAAGAGGGTCAGGAAGTTT  
ATGTAATCAGTACATATTACCTACGGTTTATGTTTTAGATTTCAAACTAA  
CGCATTAAATTGATTCTATTAACAGTGGCTTCGTTCAACGTGATGCAGAAAA  
CGCCAAGCTTCAATTA  
AAAGCACTGTCCAAAGCGTTAGGTTTTGAAGTTAA  
TGATGACTTAAGTGTATTTCGTCTTGGTGAGGAACCTAAAAACAGAGAGG

group\_  
59

hypothetical  
protein

A2, A14 /

hypothetical protein

group\_  
60

hypothetical  
protein

A3 /

hypothetical protein

CAAAAAATCAAAGCTGAAAAGCCTAGTGAAGTTATTTCTGCAGAACTCA  
ACCAACAATTGTTATTACCGAAAAACAAATGTCATCACATCTGAAGATCT  
GTTAGTTCAGAACTAACGAGCCTAAAGTAGATCCTGAATATCAAATAA  
ACTTAATACCCTGCTGCAAAGAGTTAAAGACTCAAAAACACCAGATGAAGT  
AAATGCGGTTTATCGTTATACCCGCACATGGGATGACGAACAAATGAAGC  
CTATCCTTCTCGCCACTCACAAACGCTTTGAAGAGCTAGAAAAAAAAGG  
CATCTGCTAATGAGCCACCCTCTTTAATGGTTCTAATCCAACTGCACCAG  
ACCTTACAACGCTAGATGCTTTGGAAATAGACGTGGCTGCACGAGATCCG  
CAGATTCAACCGAAGCTAATGGGCTATATAAGAAAACGCCGCTATGAATTA  
GAAAATCCAGCAGTTTCTCAACCAGAAGCAGAGCCTGATTTTCTATTAGGA  
GACGGTTTCTAG  
ATGCATGAGATTACCTTGAACGAAGTGCCTCAATTAATCGCTTCTCTTCGC  
ACTGTTTACGCTGCTCAGTTCAATAAGCAATTTCCAGCAACAGGCGAAAAGT  
GCAATTCCTCTGTCAGTGGTTGAGCAAATCGCACTTAAACACTGGTTGG  
CGTTCAACAAAACCAATTTAACACGCACTTGCTCGATTACTTACAGCAGG  
TGGACGTTTTATGCCGTCATTTGCTGAGTTTCGCACCTGGTGTATTGGTGA  
AAGTTGGATGTCTCCAGAGGAAGCTTGGTCACGTGCATGTAAGTTTACGA  
CTGACAGTACCGTGGTTATTACACAAATTACAAAATATGCATTAGACGAAG  
TGATGTATTTGATCGAAGCCGGCCAAATGCGAGCAGCTCAAGATAATTTCT  
TCGGAACCTATAACGTGATGGTGGCTAAAGCTCAATTGAAAGGTCGTCAG  
CAAGAGTTTTACGCTCCACCGCTACAACACTAGAACACAAAGAACCTAACAC  
GTTCCCTGTGAGCAATGACGAGGCTCAAAGCATCTCAAATCATTGATGGA  
AAGATTAATAATCAATGGTCGTAAACCTGCACCAGTTCAAAAACCTGAGGC  
AAAAGAAAAGAGCCTGAGCTTGCAAAAAGAATTAG  
ATGCATGAGATTACCTTGAACGAAGTGCCTCAATTAATCGCTTCTCTTCGC  
ACTGTTTACGCTGCTCAGTTCAATAAGCAATTTCCAGCAACAGGCGAAAAGT  
GCAATTCCTCTGTCAGTGGTTGAGCAAATCGCACTTAAACACTGGTTGG  
CGTTCAACAAAACCAATTTAACACGCACTTGCTCGATTACTTACAGCAGG  
TGGACGTTTTATGCCGTCATTTGCTGAGTTTCGCACCTGGTGTATTGGTGA  
AAGTTGGATGTCTCCAGAGGAAGCTTGGTCACGTGCATGTAAGTTTACGA  
CTGACAGTACCGTGGTTATTACACAAATTACAAAATATGCATTAGACGAAG  
TGATGTATTTGATCGAAGCCGGCCAAATGCGAGCAGCTCAAGATAATTTCT  
TCGGAACCTATAACGTGATGGTGGCTAAAGCTCAATTGAAAGGTCGTCAG

|                  |                                                   |                 |     |                                           |                                                                                                                                                                                                                                                                                                                                                                                                                                                                                                                                                                                                                                                                                                                                                                                                                                                                                                                                                                                                                                                                                                                                                                                                                                                                                                                                                                                                      |
|------------------|---------------------------------------------------|-----------------|-----|-------------------------------------------|------------------------------------------------------------------------------------------------------------------------------------------------------------------------------------------------------------------------------------------------------------------------------------------------------------------------------------------------------------------------------------------------------------------------------------------------------------------------------------------------------------------------------------------------------------------------------------------------------------------------------------------------------------------------------------------------------------------------------------------------------------------------------------------------------------------------------------------------------------------------------------------------------------------------------------------------------------------------------------------------------------------------------------------------------------------------------------------------------------------------------------------------------------------------------------------------------------------------------------------------------------------------------------------------------------------------------------------------------------------------------------------------------|
| <i>group_622</i> | hypothetical protein                              | A1              | S   | Ankyrin repeats (many copies)             | CAAGAGTTTTACGCTCCACCGCTACAAC TAGAACACAAAGAACCTAAACAC<br>GTTCTGTGAGCAATGACGAGGCTCAA AAGCATCTCAAATCATTGATGGA<br>AAGATTA AAAATCAATGGTCGTAAACCTGCACCAGTTCAAAAACCTTGAGGC<br>AAAAGAAAAAGAGCCTGAGCTTGCAA AAGAATTAGGTCCAGATCCTTTTCG<br>ACAATCCGCACGAATACGCTGAGATGTGCCGCCGTGAAGGTATGCCAATA<br>CCTAGAAATATTCTTCAGCTAATTGATGGGGCGAATGCATGA<br>GTGTTTTTTTATATGGGAAAGCAATCAATAAGAATTATTTAAATATAGAAC<br>TACAAATCATTTTTGGATGCTTACTCGATACTATGGATATAATGAGGAGGT<br>TTTTATTTTTGGTGTCCCCGTGAAAATTA ACTCTTTCTCTCCCATACCTGA<br>AGACGATGAAGA ACTCTCTCTTCCAGAACTGATTTATTGGGCATCTTTAGG<br>TGATCTAGAGCAAGTAAACAATTATTAATAGATGGAGAAGACCCTAATCA<br>GACTGATGATGAAGGGTATAGTGCTTTGCAAGCAGCGGCTGAGAATGATC<br>ATTTAGATATAGTGAAGCTATTAGTTGAAAAAGGGCGCATGTCCCTTATA<br>AAAGCGAATATACAGCACTACAGCTTGCAGAAATGGCGGGTAATACTGAC<br>ATAGTGAATTATTTAAAAAGTTTATAA<br>ATGATGTTGTGGCTCTTAATGAAAAATGGCGCTTCTAAAGATGAGGTTAGA<br>ATGATACAAGCTAAAGGTTATTCATATGCAGATGATAACTATAAGAGGGTA<br>AAGTAG<br>ATGGATAAACTGAACCCA ACTACAGTGATTAATATTCATATCTCATTGCTT<br>TTGGACTATTCATTATTGCTGGTCTGGTGAGCTCAAATATTTCTTGTTAGG<br>TCTTACTATCTTCTTAATTGGTGCTTTACTCGCTGGTGACAGTCTTCATTA<br>CTGCCACTTGCAGCTATGTTCTATCCAGCAGTATGCCGCGCGGTTGGAGT<br>TTCATGGATGCATGGTATCGGTCGTATCGGTGCAATTTTAGGCGCTTTCTT<br>TGGTTCGCTCATTTTCACTTTCAACCTAAGCTTAAGCGGTATTTTCTTTATT<br>CTAGCAATACCAACCTTCATCTCATTTATTGCACTTAGCCTGAAAGTAATTT<br>ATGAGAAATCTAAAAACAACAAGTGTTAAAGCTAGAAGAAAGTCTATAA |
| <i>group_624</i> | hypothetical protein                              | A1, A2, A14     | /   | hypothetical protein                      | ATGGATAAACTGAACCCA ACTACAGTGATTAATATTCATATCTCATTGCTT<br>TTGGACTATTCATTATTGCTGGTCTGGTGAGCTCAAATATTTCTTGTTAGG<br>TCTTACTATCTTCTTAATTGGTGCTTTACTCGCTGGTGACAGTCTTCATTA<br>CTGCCACTTGCAGCTATGTTCTATCCAGCAGTATGCCGCGCGGTTGGAGT<br>TTCATGGATGCATGGTATCGGTCGTATCGGTGCAATTTTAGGCGCTTTCTT<br>TGGTTCGCTCATTTTCACTTTCAACCTAAGCTTAAGCGGTATTTTCTTTATT<br>CTAGCAATACCAACCTTCATCTCATTTATTGCACTTAGCCTGAAAGTAATTT<br>ATGAGAAATCTAAAAACAACAAGTGTTAAAGCTAGAAGAAAGTCTATAA                                                                                                                                                                                                                                                                                                                                                                                                                                                                                                                                                                                                                                                                                                                                                                                                                                                                                                                                                 |
| <i>group_64</i>  | <i>mhbT</i><br>3-hydroxybenzoate transporter MhbT | L6, L8, L9, L10 | EGP | Uncharacterised MFS-type transporter YbfB | ATGGATAAACTGAACCCA ACTACAGTGATTAATATTCATATCTCATTGCTT<br>TTGGACTATTCATTATTGCTGGTCTGGTGAGCTCAAATATTTCTTGTTAGG<br>TCTTACTATCTTCTTAATTGGTGCTTTACTCGCTGGTGACAGTCTTCATTA<br>CTGCCACTTGCAGCTATGTTCTATCCAGCAGTATGCCGCGCGGTTGGAGT<br>TTCATGGATGCATGGTATCGGTCGTATCGGTGCAATTTTAGGCGCTTTCTT<br>TGGTTCGCTCATTTTCACTTTCAACCTAAGCTTAAGCGGTATTTTCTTTATT<br>CTAGCAATACCAACCTTCATCTCATTTATTGCACTTAGCCTGAAAGTAATTT<br>ATGAGAAATCTAAAAACAACAAGTGTTAAAGCTAGAAGAAAGTCTATAA                                                                                                                                                                                                                                                                                                                                                                                                                                                                                                                                                                                                                                                                                                                                                                                                                                                                                                                                                 |
| <i>group_66</i>  | <i>mhbT</i><br>3-hydroxybenzoate transporter MhbT | L7, L8, L9, L10 | EGP | Uncharacterised MFS-type transporter YbfB | ATGGATAAACTGAACCCA ACTACAGTGATTAATATTCATATCTCATTGCTT<br>TTGGACTATTCATTATTGCTGGTCTGGTGAGCTCAAATATTTCTTGTTAGG<br>TCTTACTATCTTCTTAATTGGTGCTTTACTCGCTGGTGACAGTCTTCATTA<br>CTGCCACTTGCAGCTATGTTCTATCCAGCAGTATGCCGCGCGGTTGGAGT<br>TTCATGGATGCATGGTATCGGTCGTATCGGTGCAATTTTAGGCGCTTTCTT<br>TGGTTCGCTCATTTTCACTTTCAACCTAAGCTTAAGCGGTATTTTCTTTATT                                                                                                                                                                                                                                                                                                                                                                                                                                                                                                                                                                                                                                                                                                                                                                                                                                                                                                                                                                                                                                                              |

|                  |                                                   |                 |     |                                           |                                                                                                                                                                                                                                                                                                                                                                                                                                                                                                                                                                                                                                                                                                                                                                                                                                                                                                                                                                                                                                                                                                                                                                                                                                                                                                                                                                                                                                                                                                                                                                                                                                                                                                                                                                                                                                           |
|------------------|---------------------------------------------------|-----------------|-----|-------------------------------------------|-------------------------------------------------------------------------------------------------------------------------------------------------------------------------------------------------------------------------------------------------------------------------------------------------------------------------------------------------------------------------------------------------------------------------------------------------------------------------------------------------------------------------------------------------------------------------------------------------------------------------------------------------------------------------------------------------------------------------------------------------------------------------------------------------------------------------------------------------------------------------------------------------------------------------------------------------------------------------------------------------------------------------------------------------------------------------------------------------------------------------------------------------------------------------------------------------------------------------------------------------------------------------------------------------------------------------------------------------------------------------------------------------------------------------------------------------------------------------------------------------------------------------------------------------------------------------------------------------------------------------------------------------------------------------------------------------------------------------------------------------------------------------------------------------------------------------------------------|
| <i>group_664</i> | hypothetical protein                              | A2, A3, A14     | /   | hypothetical protein                      | CTAGCAATACCAACCTTCATCTCATTTATTGCACTTAGCCTGAAAGTAATTT<br>ATGAGAAATCTAAAAACAAACAAGTGTTAAAGCTAGAAGAAAGTCTATAA<br>ATGAGAAAACCTTGTTTCTATCATCATTTTGCTGGGCATCGCTTGGGTGGCT<br>AAGCTCAGCTACGATATGTGGCAAATTTCTCGTACCGTCCCTGAACTTCAG<br>CAAAGCTTGCTGCAATCTGAACAGCAATATGCCAATTTGAATGATCAATTG<br>GTTGCTTTGCAAAGACAAATTCAAAATCAACCAAGTCATAATTCTAAAAACA<br>ACGCCTTTAGCAACGACAGAAGTTGTTCAAACCGGGAATTGCACCGACCG<br>TATTAA<br>ATGGATAAACTGAACCCAACTACAGTGATTAATATTCATATCTCATTGCTT<br>TTGGACTATTCATTATTGCTGGTCTGGTGAGCTCAAATATTTTCTTGTTAGG<br>TCTTACTATCTTCTTAATTGGTGCTTTACTCGCTGGTGCACAGTCTTCATTA<br>CTGCCACTTGACAGCTATGTTCTATCCAGCAGTATGCCGCGCGGTTGGAGT<br>TTCATGGATGCATGGTATCGGTCGTATCGGTGCAATTTTAGGCGCTTTCTT<br>TGGTTCGCTCATTTTCACTTTCAACCTAAGCTTAAGCGGTATTTTCTTTATT<br>CTAGCAATACCAACCTTCATCTCATTTATTGCACTTAGCCTGAAAGTAATTT<br>ATGAGAAATCTAAAAACAAACAAGTGTTAAAGCTAGAAGAAAGTCTATAA<br>ATGGATAAACTGAACCCAACTACAGTGATTAATATTCATATCTCATTGCTT<br>TTGGACTATTCATTATTGCTGGTCTGGTGAGCTCAAATATTTTCTTGTTAGG<br>TCTTACTATCTTCTTAATTGGTGCTTTACTCGCTGGTGCACAGTCTTCATTA<br>CTGCCACTTGACAGCTATGTTCTATCCAGCAGTATGCCGCGCGGTTGGAGT<br>TTCATGGATGCATGGTATCGGTCGTATCGGTGCAATTTTAGGCGCTTTCTT<br>TGGTTCGCTCATTTTCACTTTCAACCTAAGCTTAAGCGGTATTTTCTTTATT<br>CTAGCAATACCAACCTTCATCTCATTTATTGCACTTAGCCTGAAAGTAATTT<br>ATGAGAAATCTAAAAACAAACAAGTGTTAAAGCTAGAAGAAAGTCTATAA<br>ATGACGTTATCAAATCCGGCGGCCGTTAATGCTAACTGGTTAAAGCTTAAA<br>GAGTTAAATAACCAACAAACTGCAGCTTTGTCAACAAAGATCAGTTCAATA<br>GGTGAAAATGGATTGGTCCATTCACTTCTGGACAATGTTGAACGTAGCCG<br>GGTGCTGTGTAATTTTGTGGCCACCAATGGACTTTATACCGTTTCTTCAGG<br>TGGGTATCAGGCCGCTGTTAATGTCACGATTGAAGTTGAAGTAACACCGG<br>TAAATGAATCTGGTGCAGCGATTGGTAATCCGATGCTGAAGCAGATCATT<br>TGAAAGGTTCCGGCAAAGTCACGTCAGACCGTTGGTGCAACACTTGATATG<br>GTCACGTTTTCAGGGGCGTTGTAGTGTCCGTGCACGCCGTTTAACTCCGAC<br>TCCGACAGTCACAACAGTTGTTGATGAAGTAAAGTGGCAGGCGCTTTACG |
| <i>group_67</i>  | <i>mhbT</i><br>3-hydroxybenzoate transporter MhbT | L6, L7, L8, L10 | EGP | Uncharacterised MFS-type transporter YbfB | ATGGATAAACTGAACCCAACTACAGTGATTAATATTCATATCTCATTGCTT<br>TTGGACTATTCATTATTGCTGGTCTGGTGAGCTCAAATATTTTCTTGTTAGG<br>TCTTACTATCTTCTTAATTGGTGCTTTACTCGCTGGTGCACAGTCTTCATTA<br>CTGCCACTTGACAGCTATGTTCTATCCAGCAGTATGCCGCGCGGTTGGAGT<br>TTCATGGATGCATGGTATCGGTCGTATCGGTGCAATTTTAGGCGCTTTCTT<br>TGGTTCGCTCATTTTCACTTTCAACCTAAGCTTAAGCGGTATTTTCTTTATT<br>CTAGCAATACCAACCTTCATCTCATTTATTGCACTTAGCCTGAAAGTAATTT<br>ATGAGAAATCTAAAAACAAACAAGTGTTAAAGCTAGAAGAAAGTCTATAA<br>ATGGATAAACTGAACCCAACTACAGTGATTAATATTCATATCTCATTGCTT<br>TTGGACTATTCATTATTGCTGGTCTGGTGAGCTCAAATATTTTCTTGTTAGG<br>TCTTACTATCTTCTTAATTGGTGCTTTACTCGCTGGTGCACAGTCTTCATTA<br>CTGCCACTTGACAGCTATGTTCTATCCAGCAGTATGCCGCGCGGTTGGAGT<br>TTCATGGATGCATGGTATCGGTCGTATCGGTGCAATTTTAGGCGCTTTCTT<br>TGGTTCGCTCATTTTCACTTTCAACCTAAGCTTAAGCGGTATTTTCTTTATT<br>CTAGCAATACCAACCTTCATCTCATTTATTGCACTTAGCCTGAAAGTAATTT<br>ATGAGAAATCTAAAAACAAACAAGTGTTAAAGCTAGAAGAAAGTCTATAA<br>ATGACGTTATCAAATCCGGCGGCCGTTAATGCTAACTGGTTAAAGCTTAAA<br>GAGTTAAATAACCAACAAACTGCAGCTTTGTCAACAAAGATCAGTTCAATA<br>GGTGAAAATGGATTGGTCCATTCACTTCTGGACAATGTTGAACGTAGCCG<br>GGTGCTGTGTAATTTTGTGGCCACCAATGGACTTTATACCGTTTCTTCAGG<br>TGGGTATCAGGCCGCTGTTAATGTCACGATTGAAGTTGAAGTAACACCGG<br>TAAATGAATCTGGTGCAGCGATTGGTAATCCGATGCTGAAGCAGATCATT<br>TGAAAGGTTCCGGCAAAGTCACGTCAGACCGTTGGTGCAACACTTGATATG<br>GTCACGTTTTCAGGGGCGTTGTAGTGTCCGTGCACGCCGTTTAACTCCGAC<br>TCCGACAGTCACAACAGTTGTTGATGAAGTAAAGTGGCAGGCGCTTTACG                                                                                                                                                                                                                                                                                                                                                                                                             |
| <i>group_68</i>  | <i>mhbT</i><br>3-hydroxybenzoate transporter MhbT | L6, L7, L8, L9  | EGP | Uncharacterised MFS-type transporter YbfB | ATGGATAAACTGAACCCAACTACAGTGATTAATATTCATATCTCATTGCTT<br>TTGGACTATTCATTATTGCTGGTCTGGTGAGCTCAAATATTTTCTTGTTAGG<br>TCTTACTATCTTCTTAATTGGTGCTTTACTCGCTGGTGCACAGTCTTCATTA<br>CTGCCACTTGACAGCTATGTTCTATCCAGCAGTATGCCGCGCGGTTGGAGT<br>TTCATGGATGCATGGTATCGGTCGTATCGGTGCAATTTTAGGCGCTTTCTT<br>TGGTTCGCTCATTTTCACTTTCAACCTAAGCTTAAGCGGTATTTTCTTTATT<br>CTAGCAATACCAACCTTCATCTCATTTATTGCACTTAGCCTGAAAGTAATTT<br>ATGAGAAATCTAAAAACAAACAAGTGTTAAAGCTAGAAGAAAGTCTATAA<br>ATGACGTTATCAAATCCGGCGGCCGTTAATGCTAACTGGTTAAAGCTTAAA<br>GAGTTAAATAACCAACAAACTGCAGCTTTGTCAACAAAGATCAGTTCAATA<br>GGTGAAAATGGATTGGTCCATTCACTTCTGGACAATGTTGAACGTAGCCG<br>GGTGCTGTGTAATTTTGTGGCCACCAATGGACTTTATACCGTTTCTTCAGG<br>TGGGTATCAGGCCGCTGTTAATGTCACGATTGAAGTTGAAGTAACACCGG<br>TAAATGAATCTGGTGCAGCGATTGGTAATCCGATGCTGAAGCAGATCATT<br>TGAAAGGTTCCGGCAAAGTCACGTCAGACCGTTGGTGCAACACTTGATATG<br>GTCACGTTTTCAGGGGCGTTGTAGTGTCCGTGCACGCCGTTTAACTCCGAC<br>TCCGACAGTCACAACAGTTGTTGATGAAGTAAAGTGGCAGGCGCTTTACG                                                                                                                                                                                                                                                                                                                                                                                                                                                                                                                                                                                                                                                                                                                                                                                                                                                                        |
| <i>group_7</i>   | hypothetical protein                              | L6, L7, L8, L10 | /   | hypothetical protein                      | CTAGCAATACCAACCTTCATCTCATTTATTGCACTTAGCCTGAAAGTAATTT<br>ATGAGAAATCTAAAAACAAACAAGTGTTAAAGCTAGAAGAAAGTCTATAA<br>ATGAGAAAACCTTGTTTCTATCATCATTTTGCTGGGCATCGCTTGGGTGGCT<br>AAGCTCAGCTACGATATGTGGCAAATTTCTCGTACCGTCCCTGAACTTCAG<br>CAAAGCTTGCTGCAATCTGAACAGCAATATGCCAATTTGAATGATCAATTG<br>GTTGCTTTGCAAAGACAAATTCAAAATCAACCAAGTCATAATTCTAAAAACA<br>ACGCCTTTAGCAACGACAGAAGTTGTTCAAACCGGGAATTGCACCGACCG<br>TATTAA<br>ATGGATAAACTGAACCCAACTACAGTGATTAATATTCATATCTCATTGCTT<br>TTGGACTATTCATTATTGCTGGTCTGGTGAGCTCAAATATTTTCTTGTTAGG<br>TCTTACTATCTTCTTAATTGGTGCTTTACTCGCTGGTGCACAGTCTTCATTA<br>CTGCCACTTGACAGCTATGTTCTATCCAGCAGTATGCCGCGCGGTTGGAGT<br>TTCATGGATGCATGGTATCGGTCGTATCGGTGCAATTTTAGGCGCTTTCTT<br>TGGTTCGCTCATTTTCACTTTCAACCTAAGCTTAAGCGGTATTTTCTTTATT<br>CTAGCAATACCAACCTTCATCTCATTTATTGCACTTAGCCTGAAAGTAATTT<br>ATGAGAAATCTAAAAACAAACAAGTGTTAAAGCTAGAAGAAAGTCTATAA<br>ATGACGTTATCAAATCCGGCGGCCGTTAATGCTAACTGGTTAAAGCTTAAA<br>GAGTTAAATAACCAACAAACTGCAGCTTTGTCAACAAAGATCAGTTCAATA<br>GGTGAAAATGGATTGGTCCATTCACTTCTGGACAATGTTGAACGTAGCCG<br>GGTGCTGTGTAATTTTGTGGCCACCAATGGACTTTATACCGTTTCTTCAGG<br>TGGGTATCAGGCCGCTGTTAATGTCACGATTGAAGTTGAAGTAACACCGG<br>TAAATGAATCTGGTGCAGCGATTGGTAATCCGATGCTGAAGCAGATCATT<br>TGAAAGGTTCCGGCAAAGTCACGTCAGACCGTTGGTGCAACACTTGATATG<br>GTCACGTTTTCAGGGGCGTTGTAGTGTCCGTGCACGCCGTTTAACTCCGAC<br>TCCGACAGTCACAACAGTTGTTGATGAAGTAAAGTGGCAGGCGCTTTACG                                                                                                                                                                                                                                                                                                                                                                                                                                                            |

GTGCTTATCCTTTACAAAGCACAGTGTATGAACATGAAACGGTTTTTCGTG  
CGCGTACTTATGCAACCACTGGAGCTTTATCTGTTAAGTCCCGCAAGATCA  
ATTTTGATCTTCAGCGAATGTTGCCGACTTATAAAAACGGGGCAATGACAA  
CAGAGCTATATCCAACGTCTAGCTTTGCTGATGCTTTGGTATCTATGGCAC  
TCGATGACAAGATTGGCCGCCGTTTCGATCGATGAGATTGATCTTGAAAAC  
ATCTATCGGACCTATAATGATGTAGTTGATTATTTTGGTACGCCGCTAGCG  
GCTGAGTTCTGTACTACCATTGATGATACGAATCTATCTTTTGAAGAGCTG  
GTTACCAATCTTTGTGATGCGGTGTTTTGTA CTGCATATCGGCAAAACAAT  
AAGCTCAAGCTTTATTTTGAACGGCCA ACTGATAACTCGGTAATGCTGTTT  
AACTTCAGGAATATCATTCCGGATAGTTACAAGCATGACCTGACCTTTGGC  
GTGATGGATGACTACGACGGACTGATCTATGAATACACGGATCCGACCGA  
CGATAGCCGTATCAATATCTATTTACCGGATAAAGGAGCCAAAACCCAAA  
AGAGGTGAAATCTGTTGGTGTACGAAACAAGTGGCAAGCGCATTTC AATG  
CATACCGGATTTGGAACAAGATGCGCTTCCAGCGCAAATCCATTACCTTT  
GATGCGGCACCAGAATCAGAATTACTGGTTTTACGTGACCGGATTGCTGT  
AGCGGATTATCGCAATGGTATTCATCAAAGCGGTGAGGTGGTACAGCAAG  
AAGGTTTAGTCCTCACCTTAAGCCATGATGTAGATTTTCATTGCAGGCAAGA  
GCTATGTGATTTATCTGCAAATGGCGGATGGCACAGTGGACCTGATTCT  
GTTACACCGGGTTCAGCCAAAATAAGGTGGTTTTAGGGCGGTTGCCGAA  
CGGGGCCTTAAAGCTAAGTCCTGATGATTTTGTAAATACCATCTATACAGT  
AGTTAATGATGATACTAAAGGTTCAATTGCCTTATCTGGTTGCAAAAAGAGA  
ACCGGTTGACCAGTTCTCTAATACTATTACAGCAATTAATTACGATGAGCG  
CTATTACCTCAACGATAAAGACTTTATTGACGTGCCGGTTGATGATTCTCC  
AATTTACATTCGATATGACCAGCTGGATATTAATCTGGCGGTTTATATCA  
GATGCAAAGAGGGGATTTGCCAACGACTGGCGAAATCAGTTTTGTAGTTG  
AATCTGGTGCAGTATTTCTAGTTTCGAGTTCTTATCGACCGGAAACCAGAT  
TTGTCTATAAATTCGACTACA ACTCCAGTCCGCCGAAACAGGAATTTATTG  
CCCCTGCAGCGACTGAACTACCCGCCATTGATACTGGTGAGTTCCACCT  
GATCTGGTGGTAAATCTGACTATTAAGGTGCTGTTGTTGGGCGTGGTGG  
TGATGGCGGTTTACCTCATTTGGCATTGCGCATGGGAGTCCGATCCGG  
ATTACA ACTTTACTAAAACCCGACGTGATGGGTTTCAGGGAGCACCCGGT  
TTATTGAACCGGCACAGCAA ACTAAACCTGATTATTGATGGCGGCACTCTA  
GCTCGAGGTGGATCTGGTGGTGGAGCAACACCAAGCGGTATTTACTG

group\_  
74

hypothetical  
protein

L6, L7,  
L8, L9

H

DNA polymerase III is a complex,  
multichain enzyme responsible for most  
of the replicative synthesis in bacteria.  
This DNA polymerase also exhibits 3' to  
5' exonuclease activity

group\_  
8

hypothetical  
protein

A2, A3,  
A14

S

cellulase activity

GGTTGTCTTATGGTGTTC AAGGTATTCCGGGTGGAGCTGGTGCACCATTT  
GGACGGGTCATGACAGGCCAGCCAATTTCAAGCGACTCACAAGATTGGC  
GCTGGTATTTTGAAGTTACTTCAATGTCTTAAAAATTACTGATGCCGAAG  
CTTCGGTACCCGGAAAAGGCTACCGAACCCAAAATGACCGTTATGGATCC  
CCATTATCAGGTGATGGCGGAAACTGGGGCGAACGTGGTACCAAGTCTA  
CTAATGATGGAACATGGAAGTGGAAATACCATGGCACAACCTGAAGGTGAG  
CCGGGGCCAGGTGGACCTGCAATTGTGGGAGTTGCACCACTGACAACCTC  
AATTGATTAATGGAGGGAAAATCTTACAAACCCTTTAA  
ATGGTATTTGACCCAAATCATCATGAGTTGATTGGACTTGAGTCAGCAGTT  
GTTCAAGAGACTGTTAGTGTCTTGAGGAAGATTTTATTCCGGTACCAGAA  
CAAAAGTTAGTACAAGTTCAGGCTGAAACCCAAAGTCAAACAATCGAACCT  
GAACCAGCTTCTACTGCTGAGCCTATAGGTTTATTTGAAGCATCGAGTGCT  
GAATTTTCACTTGCTCAAGATACGTCAGCTTATGACTTGGTTTCTGAACCT  
GTTATTGAACAACAGTCATTGGTGCAAGTTGAAATTGTTGAAACAGTTGTG  
GTGGTAAAAGAGCCTAACGCAACAGATAACAGCCAGCTGATGCCACAAGA  
TATTTTAAAGTTGCCATCACAACCTTTGGAAGGTGAGTGGACACTTGAAAA  
GTGGGAGTTTTGGTTTAGAAATAGCCAGCTTTCTCCAGCCGTTCAAGAACT  
TGCTCAACATGGTGTGATGACTGGGGAAATTGGTGGCAACACGGTTTTTCC  
ATATTCCTCAAGAATATGAAAATATGTTGACTCAGCTACAACAAGCCTTAAT  
TGAAGCTTTAAAGCAGCAGTGGCCAAATACACAATTTACGGTTCGAGTATG  
GTGCAGTCAATACTGCTACACCGTATGTTATGCAAAGCGTTCGTAAAGAAA  
AAGCTTTCCATCGGGCTACAGAACTATTACAGCAACAACCCGTTATTA  
GCCTCATAGAGACTTTTTGATGGTGGAGCTGCAAAAATTTCAATTA  
AAACCTTAA  
ATGATTAAAGTTATTTATAAAAAAGACGCTTTGTCTGAAGAAAAGACAATTG  
AGCAGGCTCAAACCATTTGGGCAATGGCTCACTTCAAAAATATGAACATATG  
CCTGAGCATGTCCGTATCTTTCATACTACAAGCAATATGGATCATGCCGAA  
ATTTCAATTTGCGAATGAAGTCACACCAAGAATGCATATGACTTAAAGCAG  
CTTGATTTCTTACCGGGCACTTTTATCGTAGTTGAGAACCCTAAATGGGTC  
GCGGCTATTGTTTCGATTGTGATTAGTATTGCGATCGCATTTTTTAATGCCA  
ACGCCATCAATAGCACAAACGACTCAAATACTAACCAGTCTTCTTCAGCA  
AACAATGAACCTTTCTAACCGGGAAAACAAGATCCGGGTGAATGGTTCGTAT  
TGCTGATAACTATGGAGCTGGGTGGAATACTCCCGACCTAATCGCAGTAC

CTTACAAGGTATATGAAAACAACGTTGAAGTTGAGCATGTAGTGGGCTGTA  
TTGGGCGTGGACACTATAAAATCAATGGAGCTTATGACGGTCAAACCAAT  
ATTGTCGATATTGCTGGCGCATCGGTAGAAGTCTTTCGACCAGGTGTAGA  
TATTGTTTCAGGTGAGCCATATTTCTCGCTTGGTACCGAAATTACCACGCC  
GCCACTAACGGTTCAGCATCAAACCTTCTGTTAATGGCCAAGTTTTACGTCC  
TGCTGATACACAGTCTTTAGAAGGTACGAACTACCTTCATTTTGCATATCC  
AAACGAGATCCTTCGGGCATCTGCAAACAATACGGATTTAACCACTAAGTT  
TGTAAGTAATGACCGCGTAGAAATCACCAATGCCTCATTACGTTTAAACGG  
CCAGACTTATGATTTAAACGGCACTTACAGCGTTCTATCGGTAGCAGATGA  
TCGAATGACGTTATCAAATCCGGCGGCCGTTAATGCTAACTGGTTAAAGC  
TTAAAGAGTTAATAACCAACAAACTGCAGCTTTGTCACCAAAGATCAGTT  
CAATAGGTGAAAAATGGATTGGTCCATTCTGGACAATGTTGAACGTA  
GCCGGGTGCTGTGTAATTTTGTGGCCACAAATGGACTTTATACCGTTTCTT  
CAGGTGGGAATCAGGCCGCTGTTAACGTCACGATTGAAGTTGAAGTAACA  
CCGGTAAATGAATCTGGTGCAGCGATTGGTAATCCGATGCTGAAGCAGAT  
CATTTTGAAGGTTCCGGCAAAGTCGCGTCAAACCGTTGGCGCAACGCTGG  
ATATGGTGACATTTCAAGGTCGCTGTAGTGTCCGTGCACGTCGTTTAAACA  
CCAACACCGGCGGTTACAACGGTAGTAGATGAAGTAAAGTGGCAGGCGC  
TTTATGGTGCTTATCCTTTGCAAAGCACAGTGTATGAACATGAAACGGTTT  
TTCGTGCGCGCACTTATGCAACCACTGGAGCTTTATCTGTTAAGTCCCGC  
AAGATCAATTTTGTCTTCAGCGGATGTTACCGACTTTTAAAAACGGCGCA  
ATGACGACAGAGCTATTTCCAACATCAAGCTTTGCTGATGCATTGGTTTCA  
ATGGCACTGGATGACAAGATAGGCCGCCGTACGATCGACGAAATAGATCT  
GGAAAATATCTATCGGACTTATAACGATGTAGTTGATTATTTTGGTACACC  
ACTTGCGGCTGAGTTCTGTACTACGATTGATGATACAAACCTGTCTTTTGA  
AGAGCTGGTCACCAATCTTTGTGATGCCGTGTTTTGTACTGCATATCGTCA  
AAATAATAAGCTCAAGCTTTATTTTGAACGTCCAACCTGATAACTCGGTAAT  
GCTATTTAACTTCAGGAATATTATTCCTGATAGTTACAAGCATGATCTTACC  
TTTGGCGTGATGGATGACTACGATGGACTGATCTATGAATACACGGATCC  
GGCCGACGATAGTCGTATCAATATCTATCTACCGGATAAAGGGCCAAGA  
ACCCCAAAGAGGTGAAATCTGTAGGTGTGCGTAACAAGTGGCAAGCTCAT  
TTAATGCGTACCGGCTTTGGAACAAGCTTCGTTCCAGCGCAAATCCATT  
ACCTTTGATGCGGCACCTGAGTCAGAATTACTGGTTTTACGTGACCGGAT



CGCTGTAGCTGATTATCGCAATGGTATTCATCAAAGCGGTGAGGTGGTAC  
AGCAAGAAGGTTTAATTCTCACCCCTAAGCCATGATGTGCGATTTTCATTGCAG  
GCAAGAGTTATGTGATTTATTTGCAAATGGGGGATGGTACCGTGGACCTG  
ATTCCCGTTACGCCGGGTTTCAGCCAAGAACAAGTAGTTTTAGGGCGTTT  
ACCGAACGGGGCCTTAAAGCTTAGTCCCGATGACTTTGTGAATACTATCTA  
CACCGTAGTTAATGACGATACCAAAGGCTCACTGCCTTATCTGGTTGCAA  
AAGAGAACCGGCTGACCAGTTCTCTAATACCATTACTGCAATTAATTACGA  
TGAACGTTATTACCTCAATGACAAGGACTTTATTGATGTGCCGGTTGATGA  
TTCACCGATTTACATTCGATATGACCAGCTGGATATTAATCTGGCACGTTT  
ATATCAGATGCAAAGAGGGGATTTGCCAACGACTGGAGAAATCAGTTTTG  
TAGTTGAAGCAGGTGCACTAGTTTTCAAGTTCAAGTTCTTATCGACCGGAAA  
CCAGATTTGTCTATAAATTCGACTATAACTCTAGTCCTGCAAACGAGAGT  
ATATCGTTCAGCTGCATCAGAATTACCTGCTATTGATACTGGTGAGTTCC  
CACCTGATCTCGTGGTAAATTTGACTATTAAGGTGCTGTTGTTGGACGTG  
GTGGAGATGGCGGGTTGCCACATTTGGCATTGGTGATGGTCTACCGAT  
CCGGATTATAACTTTACTAAAACCCGCCGTGACGGTTTTTCAGGGAGCACC  
CGGTTTATTAACCGGCACAGTAACTAAACCTGATTATTGATGGTGGAAC  
TCTGGCTCGAGGCGGCTCAGGTGGTGGAGCAACACCAAGCGGTATTTAT  
ACAGGATTATCGTATGGAGTTCAGGGTATTCCCGGTGGAGCTGGAGCACC  
TTTTGGTCGGGTATGACCGGACAACCTATTACTAACGATTCACAAGACTG  
GCGTTGGTACTTAAATGGTGACTTTATGGTTGTCAAAGTAACCGATGCCGA  
AGCTTCGGTACCCGGTAAAGTTACCGAACCCAAAATGATCGATATGGAT  
CTCCATTGTCTGGTATGGTGGAGGTTGGGGCCAGCGCGGTACCAAGTC  
CACCAATGATGGAACATGGAAGTGGCAATACCATGGCACAACCTGAAGGCC  
AGCCGGGGCCGGGTGGACCTGCAATTGTTGGGGTGGCACCACTTACAAC  
TCAATTGATCAATGGAGGGAAAATTCTACAAACACTTTAA  
ATGACTGGAAATAATACAAGCAACAAGTTTAAAGCTGCTAGAGAGAACAAG  
GATTTTGTGCAAGACGTTAATTCAGATGCAGCAGATCCAATGCCTAAACAA  
ATTACTGTTACTAGCAGAAATAAAAAGTCAAATAACCCTTGAGCAAAATACC  
CTAAGTCAACGAGAGAGATCCAGAGTTAAAAATGGTAGGAACCTAACGATT  
CCACTATTTGCAGAAGAACTTTTGATTATAGAACTGCTGTTGAAAGCCTT  
TCTCAAAAAGAAGATGTTTCTATCAATAGCTTCATTAGAAGTATCGTTCCTG

group\_  
804

hypoth  
etical  
protein

A2, A3,  
A14

/

hypothetical protein

group\_  
806

hypothetical  
protein

A2, A3,  
A14

D

AAA domain

ATAAGTGTAAAGAAGGTGATAGGAAAAGATGCCTTCGATAAATTAATGAAA  
ACAAGCTAAATGTTGTTAAAGCAAAAAAGAAAAGTAG  
ATGGCTGAAATAATTACTATTGCTAGTAGAAAGGGTGGGGTTGGAAAAAC  
CACTATTGCAATAAATATGGTTGTTGCTTTAAGCAATAAAGGTAAAACTTTA  
TTGGTAGATGCTGATGAACAACAATCTGCTATGAAATGGAATAAGCATCGG  
AAAGAAAAGATAGATGCTATATCCATACATAAAGGATCTAATTGCTGAGTTG  
GAAAACTAGATGGGGAGTATCAGTACATTCTCATAGATGTTGCTGGCCG  
TGATTCTGAAATATTTAGAGAAGCACTTCTTATCAGTGACAAGCTAATCGT  
ACCCACTCAAGCAAGTCTTCTTGATTTAGATGTAATCCCTTATCTAAATGAA  
AAGGTTAAAACAGCTAAAAAACCAATCCAACTTGGTTTCAATGGTTGTG  
ATTAATAGAGCATCAACCAATGCCAATCCAATGAAACAGAGCAGGCAAG  
AGAATTTGTTGCTGATTATGAGGAATTCAAGTTATTGCAAACCACATTGCA  
TGAACGAAAACAGTATAGAGATGCAGTTCTTGAATCAAAGAGTGTTCTTGA  
GATGGCGGCATCTAAAGCTAAAGACGAATTAATCAATTTCTAATTGAGGT  
GCTGTGA

group\_  
808

hypothetical  
protein

A2, A3,  
A14

P

T5orf172

ATGTCAGATATTAATCACTTGAAGATATTTTTAATGATGATGATCTAGGTT  
TGCTCGATGATGGTAAAGATGGTGACATCTTTAAAATTAAGCATGTGCCTG  
TCCAACGTGCAGCAGCAGATGAAGTTGCTAAACGTAAACGCTGTAAGGAC  
TTTGATCAATTTGAGCATCTATTTAAAGATGTTCCACAGAGAGCTTCGAGAA  
GGTAAGCGTAAGCTATTACCATTTTATGATAAAAAGTTATCAGCTCGAAAAA  
GGCAGTTACTATGTTTTAAATGGTCTTTTGGTTATTTGGCAGATTTTACAT  
TACTAGAGAAGATAAGACCGTTAATAAAGTCAGAACCAGAAAAGATGGTA  
GAACTAGAACTATTTTTGAAAATGGTACTGAATCCACAATGCTCTATCGAT  
CACTAGCTAAAGCATTATATAACGATGGGCGAATTGTCTCTGAACTAATG  
AGCAAGCAAATTTCAATTTCTATACTAATTTTGGTGGGATTACAGAAAATG  
ATACATCTACTGGTTACATCTACATCTTGAATCTCATAGTAAAGAACCAAA  
AATTCAGTCACTTGAACATCTCTATAAAAATTGGATTTTCAACCACAACCTGTT  
GAAAAACGTATTGCTAATGCAAAAAAGAACCGACTTATTTGATGGCTGAC  
GTTGAAGTAATTGCTGAATATCAAGCATTCAATTAATCCACAGAAGTTTG  
AATATTACTTACATGCTTTTCTTTGGTGAGGCTTGCCTTGATTTATTGGTCGC  
AGACAAAGGTGGTAAAAATCATCAACCTAAAGAATGGTTTATTGCGCCTTT  
AAATGTGATTCAACAAGCCGTTGAATTATTAGTAAATAGCCAAATTATGAAT  
TACAAATACAATAAGCTCACAAAAGAGATAGAATTAATAATAG

|                  |                                                        |                 |   |                      |                                                                                                                                                                                                                                                                                                                                                                                                                                                                                                                                                                                                                                                                                                                                                                                                                                                                                                                                                                                                                                                                                                                                                                                                                                                                                                                                                                                                                                                                                                                                                                                                                                                                                                                                                                                                                                                                                                                |
|------------------|--------------------------------------------------------|-----------------|---|----------------------|----------------------------------------------------------------------------------------------------------------------------------------------------------------------------------------------------------------------------------------------------------------------------------------------------------------------------------------------------------------------------------------------------------------------------------------------------------------------------------------------------------------------------------------------------------------------------------------------------------------------------------------------------------------------------------------------------------------------------------------------------------------------------------------------------------------------------------------------------------------------------------------------------------------------------------------------------------------------------------------------------------------------------------------------------------------------------------------------------------------------------------------------------------------------------------------------------------------------------------------------------------------------------------------------------------------------------------------------------------------------------------------------------------------------------------------------------------------------------------------------------------------------------------------------------------------------------------------------------------------------------------------------------------------------------------------------------------------------------------------------------------------------------------------------------------------------------------------------------------------------------------------------------------------|
| <i>group_810</i> | hypothetical protein                                   | A2, A3, A14     | / | hypothetical protein | <p>GTGGAAGATTTTAGCTGGCTTCAAGATATGATTGCTGATGATGACTTAGGT<br/> CTTTAAACGTAAGAAAAAGATGTCTGCTCTAACGGCTGATGAGCAATTA<br/> GTCTCTAAGTTTAATGAAATTAATAATTTTGTGACACAGCATGGGCGTGTG<br/> CCTACGAAGAATATGGCAAATATCACTGAATATATGCTCGCTAGCCGTCTA<br/> GAAGCAGTTCAAGCCAATCCAGAGCAATACATGGCTTTAGCAGATTATGAT<br/> GAACATAATTTGCTGCCACAACATCAGGATTAA<br/> ATGTTCTGGGAACGTCTGGGTGGTATGGATGAGTTTAAAGAACTACTCCT<br/> ACCAATCCAGACTCCGGCCACTTTGGTTGGACAAGATTTGACGTTAGGAA<br/> GTTTTCCGGTTCGCCAGCAAGAAGGACAGTTGGATATTACGCTGGAAATG<br/> GGCGGTGAATATCAAGGTGAACTCGTTGGTGTATTGAAATACAACACTGA<br/> TCTATTTTCTGCGCAGTCTGCCAAGAATATGGTGCAACTGCTGCAAGCTGT<br/> GCTATCAGAGATGGTGGCTCACCTGAACGTAAGATCGTTGAGTTAGATA<br/> TCGCACCTGATTATAAAGATAGTATCCAGTTCGAGGCCCTCCGTGAAAG<br/> GCGACTGATTATGCTCAGCATGATCTATTCGCAATGATTCTCAAGCAGATT<br/> GATGAGCGTGGTGACAATCATGCTTTGACCTCAAACGATCATGCGGTTAG<br/> CTACTGTGAGTTAGGTCAACATATTGCTGGTATTGCTGAATATTTGTGTGC<br/> ACACGGCATTACACGCGGTGATCGTGTAGGTCTGATGTTAGACCGCACG<br/> GCGTTATTGCCAGCAGCAATCCTTGGGATCTGGGCGGCAGGTGCAGCTT<br/> ATGTGCCACTGGATCCTAATTTCCCAACTGAACGTCTACAGAACATTATTG<br/> AAGACGCTGAACCTAAAGTCATCTTGACTCAAACCGAGTTAATGGATGGT<br/> CTTAACGTTTCTGTGCCTCGCTTAGATATCAATCAAGCTGGTGTGTGGCA<br/> CTTGAACAAGTGCGCGAGACGCTTGCCTTTGGTGACATAGCTTATGTGAT<br/> GTACACATCAGGCTCGACAGGTAAGCCTAAAGGTGTCCGTATTGGGCATC<br/> CTTCAATTATCAATTTCTTGCTATCTATGAATGATAGATTGCAAGTAACGAC<br/> TGAAACTCAGTTGTTAGCAATCACCACGTATGCATTTGATATTTCAATTCTT<br/> GAATTACTATTCCGCTGATGTACGGCGGTGTGGTGCATGTTTGGCCACG<br/> TGAGGTATCACAAGATGGCAATCAATTGGTGGATTATCTAAATGCTAAGTC<br/> TATCAATATTCTGCAGGCAACACCGGCTTCTTGGAAAATGCTCTTAGACAG<br/> CGAGTGGAGCGGCAATGCGGGATTGACAGCACTCTGTGGAGGCGAAGC<br/> GTTAGATACTATTCTGGCAGAAAACTGCTGGGTAAAGTCGTTGCTTATG<br/> GAATGTCTATGGTCCGACCGAACTACAGTGTGGTCTAGTGCGGCTCGTA<br/> TCACTGATGCAAAGTATATTGATTTAGGTGAACCACTGGCGAACACTCAGC<br/> TTTATGTCCTTGATGAACAGCAGCGTTTAGTTCCACCAGGTGTTATGGGTG</p> |
| <i>group_82</i>  | <i>dhbF</i><br>Dimodular nonribosomal peptide synthase | L6, L7, L8, L10 | Q | Pfam:HxxPF_rpt       |                                                                                                                                                                                                                                                                                                                                                                                                                                                                                                                                                                                                                                                                                                                                                                                                                                                                                                                                                                                                                                                                                                                                                                                                                                                                                                                                                                                                                                                                                                                                                                                                                                                                                                                                                                                                                                                                                                                |

AGCTTTGGATTGGTGGTGATGGTCTGGCAGTTGATTACTGGCATCGACCA  
GAACTGACAGATGCCCAATTTAGAACATTGCCATCTCTACCAAATGCCGGT  
CGACTCTACCGTACAGGGGATAAAGTCTGCCTGCGTACAGATGGACGCTT  
GACTCATCACGGACGTCTGGATTTTCAGGTCAAGATTCGTGGGTTCCGTA  
TTGAACTAGGTGAAATTGAGAATGTTCTCAAACAAATCGACGGTATTACAG  
ACGCAGTAGTGCTAGTTAAACTACAGCTGACAACGACCAGAAACTGGTG  
GCGTATGTAAGTGGACAAGAGCTTGATATTGCTGGTTTTGAAAAGACCCTA  
CAAATCCATCTTCCAGCTTATATGGTGCCAAGTGCCTTTATCCGATTGGAT  
GAGTTTCCAATGACGGCCAACAATAAGTTGGATCGTAAGGCATTTCTGA  
GCCGATCTTTGAGCAGAGCAATGATTATGTTGCACCGCGTGATCCGATTG  
AAATCGAACTGTGTACTACCTTTGAACAAATCTTGTGCGTCAAGCGAGTTG  
GTATACATGATGATTTCTTTGAATTAGGTGGGCATTCACTATTAGCTGTGA  
AGCTTGTCAACCATCTTAAAAAGGCTTTTGGTACCGAACTGTCAGTTGCTT  
TGTTGGCACAGTACTCCACTGTGGAACGTCTGGGTGAGATCATTGCGTGAA  
AATAAAGAAATTAACCATCCATCGTAATTGAGCTGCGCCGTGGAACCTAT  
GAACAACCACTGTGGCTGTTCCATCCAATTGGTGGCAGTACCTTCTGTTAT  
ATGGAACCTTTCGCGTCATCTTAATCCGAACCGTACCCTACGTGCTATTCAG  
TCTCCTGGACTGATTGAGGCCGATGCTGCGGAAGTGGCGATTGAAGAAAT  
GGCGACGCTCTATATTGCTGAAATGCAAAGATGCAGCCTCAAGGACCTT  
ATTTCTCGGTGGCTGGTGTTCGGTGGTGGCAGTGCATACGAGATCAGT  
CATCAGTTGCGTCAAATGGGACAGCAGGTCACAGGGATTGTCATGATCGA  
TACCCGTGCTCCAATTCCAGAGAATGTGCCTGAAGATGCCGACGATGCCA  
TGCTTTTGTCTTGGTTCGCCCCTGATTTGGCTGCACCTTATGGCAAAAAGT  
TGACGATCCCAGCGCAATATTTGCGTGAGTTGAGTCCAGATCAAATGTTT  
GATCATGTACTTAAAGAAGCTAAAGCCATTAATGTTCTGCCTCTCGATGCA  
GACCCATCAGATTTCCGACTTTACTTTGATACTTATTTGGCGAATGGCATC  
GCACTCCAGACCTATTTCCCTGAACCTGAAGATTTTCCAATCCTTTTGGTC  
AAGGCCAAAGATGAGCAGGAAGACTTTGGAGAAAGTCTAGGTTGGGATCA  
ACTAGTCAAAGACACGTTGACACAAGTCGATTTGCCTGGTGACCACTCAT  
CAATTATGTACGCTGAGAATGTCGTGGCTGTAGCCCAGACAATTGATCAG  
ATGTACCCAATTCCTACATAA

|                  |                      |             |   |                        |                                                                                                                                                                                                                                                                                                                                                                                                                                                                                                                                                                                                                                                                                                                                                                                                                                                                                                                                                                                                                                                                                                                                                                                                                                                                                                                                                                                                                                                                                                                                                                                                                                                                                                                                                                                                                                                  |
|------------------|----------------------|-------------|---|------------------------|--------------------------------------------------------------------------------------------------------------------------------------------------------------------------------------------------------------------------------------------------------------------------------------------------------------------------------------------------------------------------------------------------------------------------------------------------------------------------------------------------------------------------------------------------------------------------------------------------------------------------------------------------------------------------------------------------------------------------------------------------------------------------------------------------------------------------------------------------------------------------------------------------------------------------------------------------------------------------------------------------------------------------------------------------------------------------------------------------------------------------------------------------------------------------------------------------------------------------------------------------------------------------------------------------------------------------------------------------------------------------------------------------------------------------------------------------------------------------------------------------------------------------------------------------------------------------------------------------------------------------------------------------------------------------------------------------------------------------------------------------------------------------------------------------------------------------------------------------|
| <i>group_840</i> | hypothetical protein | L6, L10     | / | hypothetical protein   | <p>ATGGTAAATACAAACTACGTTCCCTTTGTGGCTTATCTCACCATTTTCAGCAT<br/> GTGCATTACACATTAGTTTCGAAATCAACTGCATATGGATTTGCTATTTGAG<br/> GACATGAATAAGGTTCGATCAATTCTTGTCTATTGAAGGGGCTGCAGCTCA<br/> GGTTGATTTCTATTCCGAAGGTGCATATGCAGTTGTTTCAGCTTGGTGATAC<br/> TTCAGAAAGAAATCAGATTGAAGTGTATGGATTGCTTTTACATGAAGCTGT<br/> TCATGTCTGGCAAAGATTA AAAAGCTCATGGGTGAACGAGAACCGAGCT<br/> CTGAGTTTGAAGCTTATTCAATTCAGGCGATCGCTCAGGATCTCTTTAAGA<br/> TGTATGAGGAAAGCGAGGTTAAAAGTCATGGGGTGAAGGGGAAAAAGC<br/> CGACTAG</p> <p>GTGACGCTACAGGCACCCGCACAAACCCAGAAGAACCCTAAACAAAAACAA<br/> TTGGGGTTCTGGTCGAGGTGGCCGTCCGTGGCGCCGTCTTAAAGCTAAG<br/> ATCCATTTACGTGATGAGTGGACCTGTCAATGTTGTGGCATCGTCACTAAA<br/> GACTTAGAGCTTGACCATATTGTGAATGTGGCAAGAGGTGGAACGGATGA<br/> TGAATCAAACCTCCAGTCTCTTTGTGTTCCATGCCATAAAAAGAAAACCCA<br/> ACAGGAGAGCCGGCAATGA</p> <p>ATGTTGATTATCGATGAAATTCATAATTGTCTGACAGGTTTCAGCCAAATTG<br/> CTTCCCGAAGTCATGAATACGCTCAAGAACCTCAGCAATGAATTGAGTCT<br/> GAATATCGTAGGTGTTGGTACTCGTGAGGCAATCACCATACTGCATACTG<br/> ATCCGCAATATGCCAGTCGCTTTGATGTGGTGAATTTACCTAAATGGGAAC<br/> TCAATCAAGATTTTTTAAGATTATTAGTCAGCTATGTTTCGACTATTGCCGTT<br/> AAAAAACAGTCTAATCTTGCATCCAAAGAGATTGCTACGTTGATTTTTGAA<br/> GTGTCAGGTGGAATTTAGGGGATTTAAATCGATTACTGGTGGAGTGTGC<br/> CAAAGAAGCCATTTTACAAGGTGATGAAGAAATTACCTATGACATCGTACA<br/> TAAGTTTAAATGGCTTAAACCTACGGAGGGTTTAAAGAAATATTAGAAATATA<br/> AATCTCAGCCTGAGTTAA</p> <p>ATGTTGATTATCGATGAAATTCATAATTGTCTGACAGGTTTCAGCCAAATTG<br/> CTTCCCGAAGTCATGAATACGCTCAAGAACCTCAGCAATGAATTGAGTCT<br/> GAATATCGTAGGTGTTGGTACTCGTGAGGCAATCACCATACTGCATACTG<br/> ATCCGCAATATGCCAGTCGCTTTGATGTGGTGAATTTACCTAAATGGGAAC<br/> TCAATCAAGATTTTTTAAGATTATTAGTCAGCTATGTTTCGACTATTGCCGTT<br/> AAAAAACAGTCTAATCTTGCATCCAAAGAGATTGCTACGTTGATTTTTGAA<br/> GTGTCAGGTGGAATTTAGGGGATTTAAATCGATTACTGGTGGAGTGTGC<br/> CAAAGAAGCCATTTTACAAGGTGATGAAGAAATTACCTATGACATCGTACA</p> |
| <i>group_863</i> | hypothetical protein | A2, A3, A14 | L | HNH endonuclease       |                                                                                                                                                                                                                                                                                                                                                                                                                                                                                                                                                                                                                                                                                                                                                                                                                                                                                                                                                                                                                                                                                                                                                                                                                                                                                                                                                                                                                                                                                                                                                                                                                                                                                                                                                                                                                                                  |
| <i>group_87</i>  | hypothetical protein | C4, C6      | S | Bacterial TniB protein |                                                                                                                                                                                                                                                                                                                                                                                                                                                                                                                                                                                                                                                                                                                                                                                                                                                                                                                                                                                                                                                                                                                                                                                                                                                                                                                                                                                                                                                                                                                                                                                                                                                                                                                                                                                                                                                  |
| <i>group_88</i>  | hypothetical protein | C2          | S | Bacterial TniB protein |                                                                                                                                                                                                                                                                                                                                                                                                                                                                                                                                                                                                                                                                                                                                                                                                                                                                                                                                                                                                                                                                                                                                                                                                                                                                                                                                                                                                                                                                                                                                                                                                                                                                                                                                                                                                                                                  |

|                  |                      |                |   |                                       |                                                                                                                                                                                                                                                                                                                                                                                                                                                                                                                                                                                                                                                                                                                                                                                                                                                                                                                                                                                                                                                                                                                                                                                                                                                                                                                                                                                                                                                                                                                                                                                                                                                                                                                                                                                   |
|------------------|----------------------|----------------|---|---------------------------------------|-----------------------------------------------------------------------------------------------------------------------------------------------------------------------------------------------------------------------------------------------------------------------------------------------------------------------------------------------------------------------------------------------------------------------------------------------------------------------------------------------------------------------------------------------------------------------------------------------------------------------------------------------------------------------------------------------------------------------------------------------------------------------------------------------------------------------------------------------------------------------------------------------------------------------------------------------------------------------------------------------------------------------------------------------------------------------------------------------------------------------------------------------------------------------------------------------------------------------------------------------------------------------------------------------------------------------------------------------------------------------------------------------------------------------------------------------------------------------------------------------------------------------------------------------------------------------------------------------------------------------------------------------------------------------------------------------------------------------------------------------------------------------------------|
| <i>group_928</i> | hypothetical protein | A2, A3, A14    | S | Protein of unknown function (DUF1376) | <p>TAAGTTTAAATGGCTTAAACCTACGGAGGGTTTAAGAAATATTAGAAATATA<br/>AATCTCAGCCTGAGTTAA</p> <p>ATGAACTATTACCAACACCATATTGGTGACTTCAACAATGCGACTCGCCAC<br/>CTCAGTTTAATTGAGCGTGCGATTTACCGCGACTTATTAGATATGTATTAC<br/>GACACAGAAAAGGCGATTGATGCATCAAGCATTGATCGTCTAGCACGTGCG<br/>TTTGCAATGTACTACCGAAGAGCAAAAAGAAGCTCTCAAATATGTACTTGA<br/>TGAGTTTTTCATTCTTGAAGAAGGTGTTTATCGCAATAATCGTTGTGAACG<br/>AGAAATTGCTGAATATCACGGGAAAAAGAAACAAGCGAGTGAGGCTGGTA<br/>AGGCGTCTGCTGCAAAACGTGCAGCGAAAAAGAAAGGCTCGTCCAACAG<br/>TGATTCATCAAAGATGATCAAGCGTCTAACGAAAATTCAACGGTCGTTGA<br/>AAATCCGTTAAACGAAGAACAACGGATGTGCAACCAACCAATAACCATAA<br/>ACCATTAACCATAAACCAAGAACCAATTATTGATAGTAGTAATACGCG<br/>TGGAGAAAATTCGCAATTAACCTCAATTTGCTCAGTATCAGATCGA<br/>TGATCACAAACGCTATTCAATGCGTGAATTCATTTCTGAATACAGCGAGTT<br/>TCAATACGATTTCAATTCACCTTGCTCAACAAAGATTTGTTTCGGTACCTGAA<br/>ATCGACTTGAGAACCATGATTCAAATTTTCGGTGACTGGTACTTTGCAAAC<br/>GAATCAAGTTCGTTGAATACACCAAGCATCTGGTTGGTTAAGTGGTTCTCT<br/>TGGGTTCAAACAACGAGAAACAAGTCGCTGCTAACCGCAAGAAACAAGA<br/>GCAAATCAATTCAGCTGGTCAAAAACCACAAGAGTCCGGTTACTTCGCTA<br/>ATCTTTTTGAAGAACAGAGCGAATCTCAAATCGTGGATGTAACCCAGCAA<br/>AAAAGTTTCCAATGATTGAGGAGGTAGGTCATGCATGA</p> <p>ATGAGTGAGTTTGAGGGTAAATCTGGAAAGTGGGCTTGGGAGATTCAAAA<br/>AGAACAACAAGCGAAAGTGGAGGAGCTGCAAAGCGTTTAGATGGGGCA<br/>TAAAAGAGACTCAATATGCTTTGCAGTATGTTGAAGAAGACATGCGCGG<br/>CAATCATGAATTTCTACAAATGGCAATGATTTCGAACCCTTAAAGCTATAGA<br/>GCAAGTGCTCAAAGGTGGTGCTTGA</p> <p>ATGGTTAATTCTGATTATGTTCCCTGAATGGTATATCTTGCCATTCCAACATG<br/>TGCAGTACACGCTCGCTCGAAATCAACTACACATGGATTTGTTATTTGAAG<br/>ATATGGATAAGGCTGATCAATTTTTGGATATGGGAGCGGATGCACAGGTT<br/>AGTACTTTTTCTGATGGTGCATATGCAATCGTCCAAATTGGTGATACGGCG<br/>GATAAAGACCGAATTCAAGTTTATGGATTGCTTTTACATGAAGCTGTTTCAT<br/>GTCTGGCAAAGATTA AAAAGCTCATGGGTGAACGAGAACCGAGCTCTGA</p> |
| <i>group_929</i> | hypothetical protein | A2, A3, A14    | / | hypothetical protein                  | <p>ATGAGTGAGTTTGAGGGTAAATCTGGAAAGTGGGCTTGGGAGATTCAAAA<br/>AGAACAACAAGCGAAAGTGGAGGAGCTGCAAAGCGTTTAGATGGGGCA<br/>TAAAAGAGACTCAATATGCTTTGCAGTATGTTGAAGAAGACATGCGCGG<br/>CAATCATGAATTTCTACAAATGGCAATGATTTCGAACCCTTAAAGCTATAGA<br/>GCAAGTGCTCAAAGGTGGTGCTTGA</p> <p>ATGGTTAATTCTGATTATGTTCCCTGAATGGTATATCTTGCCATTCCAACATG<br/>TGCAGTACACGCTCGCTCGAAATCAACTACACATGGATTTGTTATTTGAAG<br/>ATATGGATAAGGCTGATCAATTTTTGGATATGGGAGCGGATGCACAGGTT<br/>AGTACTTTTTCTGATGGTGCATATGCAATCGTCCAAATTGGTGATACGGCG<br/>GATAAAGACCGAATTCAAGTTTATGGATTGCTTTTACATGAAGCTGTTTCAT<br/>GTCTGGCAAAGATTA AAAAGCTCATGGGTGAACGAGAACCGAGCTCTGA</p>                                                                                                                                                                                                                                                                                                                                                                                                                                                                                                                                                                                                                                                                                                                                                                                                                                                                                                                                                                                                                                                                                                                                                                   |
| <i>group_930</i> | hypothetical protein | L6, L7, L8, L9 | / | hypothetical protein                  | <p>ATGAGTGAGTTTGAGGGTAAATCTGGAAAGTGGGCTTGGGAGATTCAAAA<br/>AGAACAACAAGCGAAAGTGGAGGAGCTGCAAAGCGTTTAGATGGGGCA<br/>TAAAAGAGACTCAATATGCTTTGCAGTATGTTGAAGAAGACATGCGCGG<br/>CAATCATGAATTTCTACAAATGGCAATGATTTCGAACCCTTAAAGCTATAGA<br/>GCAAGTGCTCAAAGGTGGTGCTTGA</p> <p>ATGGTTAATTCTGATTATGTTCCCTGAATGGTATATCTTGCCATTCCAACATG<br/>TGCAGTACACGCTCGCTCGAAATCAACTACACATGGATTTGTTATTTGAAG<br/>ATATGGATAAGGCTGATCAATTTTTGGATATGGGAGCGGATGCACAGGTT<br/>AGTACTTTTTCTGATGGTGCATATGCAATCGTCCAAATTGGTGATACGGCG<br/>GATAAAGACCGAATTCAAGTTTATGGATTGCTTTTACATGAAGCTGTTTCAT<br/>GTCTGGCAAAGATTA AAAAGCTCATGGGTGAACGAGAACCGAGCTCTGA</p>                                                                                                                                                                                                                                                                                                                                                                                                                                                                                                                                                                                                                                                                                                                                                                                                                                                                                                                                                                                                                                                                                                                                                                   |

|                  |                         |             |   |                                                                                                                                                                                                                                                      |                                                                                                                                                                                                                                                                                                                                                                                                                                                                                                                                                                                                                                                                                                                                                                                                                                                                                                                                                                                                                                                                                                                                                                                                                                                                                                                                                                                                                                                                                                                                                                                                                                                                                                                                                                            |
|------------------|-------------------------|-------------|---|------------------------------------------------------------------------------------------------------------------------------------------------------------------------------------------------------------------------------------------------------|----------------------------------------------------------------------------------------------------------------------------------------------------------------------------------------------------------------------------------------------------------------------------------------------------------------------------------------------------------------------------------------------------------------------------------------------------------------------------------------------------------------------------------------------------------------------------------------------------------------------------------------------------------------------------------------------------------------------------------------------------------------------------------------------------------------------------------------------------------------------------------------------------------------------------------------------------------------------------------------------------------------------------------------------------------------------------------------------------------------------------------------------------------------------------------------------------------------------------------------------------------------------------------------------------------------------------------------------------------------------------------------------------------------------------------------------------------------------------------------------------------------------------------------------------------------------------------------------------------------------------------------------------------------------------------------------------------------------------------------------------------------------------|
| <i>group_931</i> | hypothetical protein    | A2, A3, A14 | / | hypothetical protein                                                                                                                                                                                                                                 | GTTTGAAGCTTATTCAATTCAGGCGATCGCTCAAGACCTTTTTAAAATGTAT<br>GAAGAAAGCGAGGTGAATGATGGGATGGAAGGGGAAAAAGCCAACTGA<br>ATGGTTAATTCTGATTATGTTCCCTGAATGGTATATCTTGCCATTCCAACATG<br>TGCAGTACACGCTCGCTCGAAATCAACTACACATGGATTTGTTATTTGAAG<br>ATATGGATAAGGCTGATCAATTTTTGGATATGGGAGCGGATGCACAGGTT<br>AGTACTTTTTCTGATGGTGCATATGCAATCGTCCAAATTGGTGATACGGCG<br>GATAAAGACCGAATTC AAGTTTATGGATTGCTTTTACATGAAGCTGTTTCAT<br>GTCTGGCAAAAAGATTA AAAAGCTCATGGGTGAACGAGAACCGAGCTCTGA<br>GTTTGAAGCTTATTCAATTCAGGCGATCGCTCAAGACCTTTTTAAAATGTAT<br>GAAGAAAGCGAGGTGAATGATGGGATGGAAGGGGAAAAAGCCAACTGA<br>ATGTTTCGTGATAAAGGGTATCAAGAACATGAAGAATCTAACAAAGAATTT<br>AATGCGTCACAAAAAGTTTCCGATATACGGCAACCTGTTATCTCAACTTTTT<br>GGTCAAAAAGAGAGGTTATCTAG<br>ATGGACGATTGGCAATGTAAGTATTGTAATGGTTACATTATGGTTAATCATT<br>CAAGGATAGAGGTAGGGGAAAAAGTTTACTTTTTGGTATATAAATTCGATG<br>CAAAAAATGAAAGAAAAAACTATATAAAAAAGGAAGTGAATTGCACGTT<br>GCGATAGTATTTTACATATCGAATCAAGAAAAAGACATATAAATAGAGG<br>AGGCTAAAGTCTATCCTTTAGGTGCACCTATGCCATTTGTTTATAATATGTT<br>CTGGATATGTGGTTGTGAAAGCAGGCCATAA<br>ATGTCTAAAGGTCAAACCTTTACAAGATCCGTTCTTAAATTCTCTCCGTAAAG<br>AACGCATCCCAGTTTCTATTTTCCTTGTTAACGGTATTAATTACAAGGTCA<br>TATTGAATCTTTTGACCAATATGTTGTTTTATTA AAAAATACTGTAAGTCAA<br>TGGTTTACAAACACGCAATTTCTACAGTTGTTCCAGCTCGCAACCCACGTC<br>CAGCAGGTGCACAAGGTGCAGTTTCCAGCTCAGGGTGGTAGTCAAGG<br>TGGCTTCGGTGGTCAAGGCGCTGGCTTTGGTGGTGGTCAAGGTGCTGGC<br>TTCGGTGGTCAAGGTGGCTTTGGTGGTCAAGGCGGCTTCGGTGGTCAAG<br>GTGGCTTCGGTGGTCAAGGTGGCTTCGGTGGTCAAGGTGGCTTCGGTGG<br>TCAAGGCGGCTTTGGTGGTCAAGGCGGCTTCGGCGGACATCAAGGCGGT<br>TTTGATAACGATTCTAAATTTGAAGATGGTCAAGACGACGAAAACAATCGT<br>TAA<br>ATGTGGACAGTCATTACAACGGATCTGTTTAATGAATGGCTTGAACAGCAA<br>GATGAAGCAACACAAGAGAAAGTCTTAGCTGCATTGGTTGTTCTACAACA<br>GCAAGGGCCTAGTTTAGGTTCGTCCTTTAGTAGATACCGTCTACGATTCTAA |
| <i>group_954</i> | hypothetical protein    | L8          | / | hypothetical protein                                                                                                                                                                                                                                 |                                                                                                                                                                                                                                                                                                                                                                                                                                                                                                                                                                                                                                                                                                                                                                                                                                                                                                                                                                                                                                                                                                                                                                                                                                                                                                                                                                                                                                                                                                                                                                                                                                                                                                                                                                            |
| <i>group_968</i> | hypothetical protein    | L7          | / | hypothetical protein                                                                                                                                                                                                                                 |                                                                                                                                                                                                                                                                                                                                                                                                                                                                                                                                                                                                                                                                                                                                                                                                                                                                                                                                                                                                                                                                                                                                                                                                                                                                                                                                                                                                                                                                                                                                                                                                                                                                                                                                                                            |
| <i>hfq</i>       | RNA-binding protein Hfq | A2, A3, A14 | J | RNA chaperone that binds small regulatory RNA (sRNAs) and mRNAs to facilitate mRNA translational regulation in response to envelope stress, environmental stress and changes in metabolite concentrations. Also binds with high specificity to tRNAs |                                                                                                                                                                                                                                                                                                                                                                                                                                                                                                                                                                                                                                                                                                                                                                                                                                                                                                                                                                                                                                                                                                                                                                                                                                                                                                                                                                                                                                                                                                                                                                                                                                                                                                                                                                            |
| <i>higB2</i>     | Putative toxin HigB2    | A1          | S | Phage derived protein Gp49-like (DUF891)                                                                                                                                                                                                             |                                                                                                                                                                                                                                                                                                                                                                                                                                                                                                                                                                                                                                                                                                                                                                                                                                                                                                                                                                                                                                                                                                                                                                                                                                                                                                                                                                                                                                                                                                                                                                                                                                                                                                                                                                            |

|               |                                                                              |                    |     |                                                                                                            |                                                                                                                                                                                                                                                                                                                                                                                                                                                                                                                                                                                                                                                                                                                                                                                                                                                                                                                                                                                                                                                                                                                                                                                                                                                                                                                                                                                                                                                                                                                                                                                                                                                                                                                                                                                                                                 |
|---------------|------------------------------------------------------------------------------|--------------------|-----|------------------------------------------------------------------------------------------------------------|---------------------------------------------------------------------------------------------------------------------------------------------------------------------------------------------------------------------------------------------------------------------------------------------------------------------------------------------------------------------------------------------------------------------------------------------------------------------------------------------------------------------------------------------------------------------------------------------------------------------------------------------------------------------------------------------------------------------------------------------------------------------------------------------------------------------------------------------------------------------------------------------------------------------------------------------------------------------------------------------------------------------------------------------------------------------------------------------------------------------------------------------------------------------------------------------------------------------------------------------------------------------------------------------------------------------------------------------------------------------------------------------------------------------------------------------------------------------------------------------------------------------------------------------------------------------------------------------------------------------------------------------------------------------------------------------------------------------------------------------------------------------------------------------------------------------------------|
| <i>ispE</i>   | 4-<br>diphos<br>phocytidyl-2-<br>C-<br>methyl<br>-D-<br>erythritol<br>kinase | C2, C6             | F   | Catalyzes the phosphorylation of the position 2 hydroxy group of 4-diphosphocytidyl-2C-methyl-D-erythritol | <p>ATTTACCAATATGAAGGAACTACGTGTTTCAGCATCGTGGTAAACCGTTAAG<br/>GGCATTTCATTCGATCCCCTAAGACAAGCGATTGTGCTGTGTATTGG<br/>TGATAAGAGTAATAAAAAGCGTTTTTATACAGAGATGCTAGCAATTGCAGA<br/>TGAGCAATACGCACTTCATCTCTCAACTTTAGGAGATCAATCTAATGGCTA<br/>A<br/>ATGATTTCGAGTACCTTCTCCAGCTAAGCTCAACCTGTTTTTGCATATCACA<br/>GGACGTCGTGAAAATGGTTACCATGAACTACAACTATTTTCCAACCTATT<br/>GATTTATATGACTGGATGACATTTACGCCTATATCTGAAGATGAGATTGAG<br/>ATTGAAGGTTTAGGTGAGGTTCAACTTGAGCAAAAATCTGATTTATCGGGCG<br/>GCACAGATATTACGCCCTCACGCTCAAATCCTTGCGGACTCCATATAAAA<br/>ATTGAAAAAATATTCCGATGGGTGCCGGTTTAGGTGGCGGTTCTTCCAAT<br/>GCAGCAACGACGCTTATTGTCTTAAATCAATTATGGCAATGTGGTCTAACT<br/>GAAGAACAATTAGCTCAGTTCGGTGTCAAGCTTGGTGCCGATGTTCCAAT<br/>TTTTATTTATGGGTTAAATGCATGGGCTGAAGGGATTGGTGAACATTTATC<br/>ATTCATAGACTTAGATCAAAAACAATTCATTGTTTTAAACCTGATTGTTTTA<br/>TCAGCACTCAACTGCTTTTTTCAAAAAACATTGACAAGAGATTCTAAGC<br/>CCACTACATTTTGCGCCTATCAGTTAGAACCTTCTAATTTTCGAAATAACTT<br/>TGAGCCTTTGGCTAGAGAGTTATACCCTGAAGTTGAAGAAGCAATGCAAT<br/>ATCTCGATCAGTTTGGTCATGCAAAGCTTACAGGTACAGGTGCTTGTGTTT<br/>TTGCTGAGGTAACCGATGAAATGAATGTTGATGACATTCTTAAACATGCAC<br/>CATGTAAAGCTTACTTGGTACATAGTTTAAAAGAATCTCCTTTACGTCATTT<br/>TAAAGTTGCAAGTTAG<br/>ATGGATAAACTGAACCCAACCTACAGTGATTAATATTCATATCTCATTGCTT<br/>TTGGACTATTCATTATTGCTGGTCTGGTGAGCTCAAATATTTTCTTGTTAGG<br/>TCTTACTATCTTCTAATTGGTGCTTTACTCGCTGGTGCACAGTCTTCATTA<br/>CTGCCACTTGCAGCTATGTTCTATCCAGCAGTATGCCGCGCGGTTGGAGT<br/>TTCATGGATGCATGGTATCGGTCGTATCGGTGCAATTTTAGGCGCTTTCTT<br/>TGGTTCGCTCATTTCACCTTCAACCTAAGCTTAAAGCGGATTTTCTTTATT<br/>CTAGCAATACCAACCTTCATCTCATTATTGCACTTAGCCTGAAAGTAATTT<br/>ATGAGAAATCTAAAAACAACAAGTGTTAAAGCTAGAAGAAAGTCTATAA<br/>ATGATTGACAAAAGTAAGTCCTCACTAAGCGAGGTTTTATCGCAGATTTAAA<br/>GATGGTGCAACCATTCTGATTGGTGGTTTTGGTACCGCAGGACAACCCGC<br/>TGAACCTATTGACGGTCTGATTGAACTTGGCGTTAAGGACTTGACCATTGT</p> |
| <i>mhbT</i>   | 3-<br>hydrox<br>ybenz<br>oate<br>transp<br>orter<br>MhbT                     | C2                 | EGP | Uncharacterised MFS-type transporter YbfB                                                                  | <p>ATGGATAAACTGAACCCAACCTACAGTGATTAATATTCATATCTCATTGCTT<br/>TTGGACTATTCATTATTGCTGGTCTGGTGAGCTCAAATATTTTCTTGTTAGG<br/>TCTTACTATCTTCTAATTGGTGCTTTACTCGCTGGTGCACAGTCTTCATTA<br/>CTGCCACTTGCAGCTATGTTCTATCCAGCAGTATGCCGCGCGGTTGGAGT<br/>TTCATGGATGCATGGTATCGGTCGTATCGGTGCAATTTTAGGCGCTTTCTT<br/>TGGTTCGCTCATTTCACCTTCAACCTAAGCTTAAAGCGGATTTTCTTTATT<br/>CTAGCAATACCAACCTTCATCTCATTATTGCACTTAGCCTGAAAGTAATTT<br/>ATGAGAAATCTAAAAACAACAAGTGTTAAAGCTAGAAGAAAGTCTATAA<br/>ATGATTGACAAAAGTAAGTCCTCACTAAGCGAGGTTTTATCGCAGATTTAAA<br/>GATGGTGCAACCATTCTGATTGGTGGTTTTGGTACCGCAGGACAACCCGC<br/>TGAACCTATTGACGGTCTGATTGAACTTGGCGTTAAGGACTTGACCATTGT</p>                                                                                                                                                                                                                                                                                                                                                                                                                                                                                                                                                                                                                                                                                                                                                                                                                                                                                                                                                                                                                                                                                                                                                                                       |
| <i>pcaI_2</i> | 3-<br>oxoadi<br>pate                                                         | L6, L7,<br>L9, L10 | I   | 3-oxoadipate CoA-transferase activity                                                                      | <p>ATGGATAAACTGAACCCAACCTACAGTGATTAATATTCATATCTCATTGCTT<br/>TTGGACTATTCATTATTGCTGGTCTGGTGAGCTCAAATATTTTCTTGTTAGG<br/>TCTTACTATCTTCTAATTGGTGCTTTACTCGCTGGTGCACAGTCTTCATTA<br/>CTGCCACTTGCAGCTATGTTCTATCCAGCAGTATGCCGCGCGGTTGGAGT<br/>TTCATGGATGCATGGTATCGGTCGTATCGGTGCAATTTTAGGCGCTTTCTT<br/>TGGTTCGCTCATTTCACCTTCAACCTAAGCTTAAAGCGGATTTTCTTTATT<br/>CTAGCAATACCAACCTTCATCTCATTATTGCACTTAGCCTGAAAGTAATTT<br/>ATGAGAAATCTAAAAACAACAAGTGTTAAAGCTAGAAGAAAGTCTATAA<br/>ATGATTGACAAAAGTAAGTCCTCACTAAGCGAGGTTTTATCGCAGATTTAAA<br/>GATGGTGCAACCATTCTGATTGGTGGTTTTGGTACCGCAGGACAACCCGC<br/>TGAACCTATTGACGGTCTGATTGAACTTGGCGTTAAGGACTTGACCATTGT</p>                                                                                                                                                                                                                                                                                                                                                                                                                                                                                                                                                                                                                                                                                                                                                                                                                                                                                                                                                                                                                                                                                                                                                                                       |



|               |                                         |             |   |                                                                                                                       |                                                                                                                                                                                                                                                                                                                                                                                                                                                                                                                                                                                                                                                                                                                                                                                                                                                                                                                                                                                                                                                                                                                                                                                                                                                                                                                                                                                                                                                                                                                                                                                                                                                                                                                                                                                                                                                  |
|---------------|-----------------------------------------|-------------|---|-----------------------------------------------------------------------------------------------------------------------|--------------------------------------------------------------------------------------------------------------------------------------------------------------------------------------------------------------------------------------------------------------------------------------------------------------------------------------------------------------------------------------------------------------------------------------------------------------------------------------------------------------------------------------------------------------------------------------------------------------------------------------------------------------------------------------------------------------------------------------------------------------------------------------------------------------------------------------------------------------------------------------------------------------------------------------------------------------------------------------------------------------------------------------------------------------------------------------------------------------------------------------------------------------------------------------------------------------------------------------------------------------------------------------------------------------------------------------------------------------------------------------------------------------------------------------------------------------------------------------------------------------------------------------------------------------------------------------------------------------------------------------------------------------------------------------------------------------------------------------------------------------------------------------------------------------------------------------------------|
| <i>pcaL_3</i> | CoA-transferrase subunit A              | L7, L8      | I | 3-oxoadipate CoA-transferase activity                                                                                 | <p>GAGCAACAATGCCGGTAATGGGGATTATGGTCTGGCTAAACTGCTCAAAG<br/> CCGGTTCAATTAATAAAGTGATTTGCTCTTTCCCACGTCAGTCTGACTCTT<br/> ATGTGTTTGATGAACTGTACCGTGCCGGAAAGGTTGAACTTGAAGTGGTA<br/> CCACAAGGCAATCTGGCGTGCCGTATTCAGGCAGCAGGTATGGGCCTTG<br/> GGGCGGTGTTTACACCAACAGGCTTTGGAACACTTTTAGCTGAAGGCAAA<br/> GAAACCCGTCATATTGATGGTAAAGACTATGTGCTTGAGTATCCGATCAAG<br/> GCTGACTTTGCCCTGATTAAGCCTATAAGGGCGACCGCTGGGGCAATCT<br/> GGTTTACCGTAAATCTGCACGTAACCTTTGGCCCGATCATGGCCATGGCTG<br/> CTGATGTCACCATGCCCAGGTTTCTGAAGTGGTTGAACTGGGTGGATTA<br/> GACCCGGAACACATCATTACCCAGGTATTTTTGTACAGCACGTTGTACAA<br/> GTACAGCCCGCACAGTAA<br/> ATGATTGACAAAAGTAAGTCCTCACTAAGCGAGGTTTTATCGCAGATTA<br/> GATGGTGCAACCATTCTGATTGGTGGTTTTGGTACCGCAGGACAACCCGC<br/> TGAACCTATTGACGGTCTGATTGAACTTGGCGTTAAGGACTTGACCATTGT<br/> GAGCAACAATGCCGGTAATGGGGATTATGGTCTGGCTAAACTGCTCAAAG<br/> CCGGTTCANNNNNNNNNCTTTCCCACGTCAGTCTGACTCTTATGTGTTT<br/> GATGAACTGTACCGTGCCGGAAAGGTTGAACTTGAAGTGGTACCACAAGG<br/> CAATCTGGCGTGCCGTATTCAGGCAGCAGGTATGGGCCTTGGGGCGGTG<br/> TTTACACCAACAGGCTTTGGAACACTTTTAGCTGAAGGCAAAGAAACCCGT<br/> CATATTGATGGTAAAGACTATGTGCTTGAGTATCCGATCAAGGCTGACTTT<br/> GCCCTGATTAAGCCTATAAGGGCGACCGCTGGGGCAATCTGGTTTACCG<br/> TAAATCTGCACGTAACCTTTGGCCCGATCATGGCCATGGCTGCTGATGTCA<br/> CCATTGCCAGGTTTCTGAAGTGGTTGAACTGGGTGGATTAGACCCGGAA<br/> CACATCATTACCCAAGGTATTTTTGTACAGCACGTTGTACAAGTACAGCCC<br/> GCACAGTAA<br/> ATGAATACCTCTTTACGTTTAAACCACTATTGGATTACTTGTGCTGATGGTT<br/> TAGAAACCCTCTTACAAGAAGAAATAGAACAGCTTGGCACCAAAGTGACA<br/> GAACGTAAAGCAGGACGTTTAAATCATTGAAGGAACGCTTGAACATGCTTA<br/> CCGTATTTGCATGTGGTACGCTTTGCTTACGTTTACTTCCAATTCA<br/> TACTTATGAACTTGAACGTACCCACGATGCACGTGATGTAGCAGAAGAGC<br/> TTTATGAAGGTGCAATTAGTTTTGATTGGTCACTTATTTTTGCACCACAAAG<br/> TACCTTTGCAATTGCTTACACGCAGAGCGTGAATTAAGGTAATACGCA<br/> GTTTGCAACCCTTCGTGTAAAAGACGGTGTGTTGATTCCCTTTATGGAAGC</p> |
| <i>rimL_2</i> | 3-oxoadipate CoA-transferrase subunit A | A2, A3, A14 | J | Specifically methylates the guanine in position 2445 (m2G2445) and the guanine in position 2069 (m7G2069) of 23S rRNA |                                                                                                                                                                                                                                                                                                                                                                                                                                                                                                                                                                                                                                                                                                                                                                                                                                                                                                                                                                                                                                                                                                                                                                                                                                                                                                                                                                                                                                                                                                                                                                                                                                                                                                                                                                                                                                                  |

|             |                                                                       |                |   |                                      |  |                                                                                                                                                                                                                                                                                                                                                                                                                                                                                                                                                                                                                                                                                                                                                                                                                                                                                                                                                                                                                                                                                                                                                                                                                                                                                                                                                                                                                                                                                                                                                                                                                                                                                                                                                                                           |
|-------------|-----------------------------------------------------------------------|----------------|---|--------------------------------------|--|-------------------------------------------------------------------------------------------------------------------------------------------------------------------------------------------------------------------------------------------------------------------------------------------------------------------------------------------------------------------------------------------------------------------------------------------------------------------------------------------------------------------------------------------------------------------------------------------------------------------------------------------------------------------------------------------------------------------------------------------------------------------------------------------------------------------------------------------------------------------------------------------------------------------------------------------------------------------------------------------------------------------------------------------------------------------------------------------------------------------------------------------------------------------------------------------------------------------------------------------------------------------------------------------------------------------------------------------------------------------------------------------------------------------------------------------------------------------------------------------------------------------------------------------------------------------------------------------------------------------------------------------------------------------------------------------------------------------------------------------------------------------------------------------|
|             | rase<br>K/L                                                           |                |   |                                      |  | TGTAGGTCGCCGCCCAAGTATTGATACCAAACAACCGGAAATTACATTATA<br>TGTGCTTGCGGGCAAACCGAGCATAACATATTGCCTAGATTTATCTGGTG<br>ATTCATTACATAAACCGCGGCTACCGTCGTTTCATGACAGATGCGCCAATTA<br>AAGAAAACCTCGCAGCAGCAATTTTACAAAAGCCAAGCTTAAGGAACGT<br>AACCCGGAAATTGTACTIONGACCCAATGTGTGGTTCAGGCACATTTATTATT<br>GAAGCATTAAATGATTTTAACTGATCGTGCGCCGGGTCTTGTACGTCGTTTT<br>GGTTTTAATGGCTGGCATGGTCATGACCGTGAACCTTTGGCTTTCACTCAA<br>GCCGAAGCAGCAGAGCGTCATGAAAAAGCACTTGAACAACCGTTACCTAA<br>GTTTTATGCATACGATGCTGACTGGGAAGCTGTAAAAGCAACACGCGAAA<br>AACATTATTGCAGCAGGTTTTGA<br>ATGGATAAGAATGATGTTGTTAAGAAGATACTTGAATCAAAAAGTACGAA<br>AACCTTGATTCAGATATTGTTGAAAAGGTTGTTCCATTTCTGAGAAGAAAT<br>ATAAATTAAGGAAGTTGAGAATTATTCTAAAAAGAAATTGCATCAAATATG<br>GGGTCTTACTATTCTGCCTATCCTAATTGGGATAAATTATTAAAAAGTAC<br>AATCAGGGGCAGTTATCAATAGAAGATTTACTAAAGATTCATTCTTCGACG<br>AATGAAAGAGTCGCAACATTAATGACTTTTACTTATGTATTTGGAAATA<br>TCAAACATGTCTCATCTATTTTAGATTTTGGTTGTGGCTTCAATCCATTAGC<br>TTTATACCAATGGAATGAAAATGAAAAATAATATATCATGCATACGATATT<br>GATAGAGCTGAGATAGCTTTTTTTGAGTAGCATTATTGGGAAGTTAAAGACG<br>ACGATAAAGTATAGGTTTTTTGAATAAAGAGAGTGATGTCTACAAAGGTACT<br>TATGATGTAGTATTCCTTTTAAAGATGCTTCTGTGCTAAAACAGCAAGAT<br>GTAAATATCTTGATTTTCTACAGCTTTTTCATACTCAAACCTTTGTAATAT<br>CTTTTCCAATAAAGTCTTTATCTGGAAAGGAGAAGGGAATGGAAGAGAATT<br>ACCAGCTATGGTTTGAATCTTTTACAAAAGGTTGGATAAAAATCCTTGATTC<br>GAAGGTTATAGGGAATGAGTTAGTATATATTACTAGTGGATTTTCAGAAATA<br>A<br>ATGACGAAACAACAGAAAACGGCGCTGAACATGGCTAAATTCATCCAGAA<br>TCAGTCTCTGCTCCTGCTGGAGAAGCTTAACGAGCTTGATCTTGATGCTG<br>AGGCCGACCTTTGTGAGAACTCCACGATGATGCAGAGCATCTTTTCCGT<br>ACACTCTCCTCGAGACTGGATTCATTACAGGATGGTAACTGA<br>ATGATTGAATCTAATGCTGTCAGTATTGATCGTAGTCGTATCACACTTAAA<br>CCCAATGTGGTTGTTGGTTATGAGGGAAACCCTTATAAAATTGTGAATGTT<br>TTAAATGCTAATGACATTGTTATATCAAGTCTTGATTCCGGTACGTAGTTTAC |
| <i>rmtB</i> | 16S<br>rRNA<br>(guanine(140<br>5)-<br>N(7))-<br>methyl<br>transferase | L7             | H | PFAM ribosomal RNA methyltransferase |  |                                                                                                                                                                                                                                                                                                                                                                                                                                                                                                                                                                                                                                                                                                                                                                                                                                                                                                                                                                                                                                                                                                                                                                                                                                                                                                                                                                                                                                                                                                                                                                                                                                                                                                                                                                                           |
| <i>rop</i>  | Regulatory<br>protein<br>rop                                          | A1, A2,<br>A14 | S | Rop protein                          |  |                                                                                                                                                                                                                                                                                                                                                                                                                                                                                                                                                                                                                                                                                                                                                                                                                                                                                                                                                                                                                                                                                                                                                                                                                                                                                                                                                                                                                                                                                                                                                                                                                                                                                                                                                                                           |
| <i>tnsB</i> | Transposon<br>Tn7                                                     | L7, L9,<br>L10 | L | Mu transposase, C-terminal           |  |                                                                                                                                                                                                                                                                                                                                                                                                                                                                                                                                                                                                                                                                                                                                                                                                                                                                                                                                                                                                                                                                                                                                                                                                                                                                                                                                                                                                                                                                                                                                                                                                                                                                                                                                                                                           |

transp  
osition  
protein  
TnsB

AGGTCAATTCTAAAAGTTTGACCGTTTTTGAGGGAGAAAATACGCTAACTG  
AAAACCTAAACAAAGGTGATAAGGATATCAGCAATGAAGCTTGGCAGATT  
GCTTTACAACGTTATGAGATTATTAAGCCTTTGATTGAGTATTCAACCACTG  
AACTGGTTGAAAATAGAGCGAATGAATATGATGTAAATCGTTCTACATTGT  
GGAAGTGGCTTAGAGATTATCGTGAAAATAACTCTCTAATGACGTTGATTC  
CCAAAAACGAGGTTGGACAACCTGAAAATCAAGGTTGTACCTCAAGTG  
AGCAATATCATTAAACAAGCTATCAATGATGAATATTTGAATGCGAAGAAA  
CCTAGTATTTCCAAAACGATTGAAATTGTAAAAGCAGAGTGTTCCACGGCTT  
CAGCTTGAAGCACCACATGAAAACCTATTTCGTAGAAGAATCGAGGCTTTA  
AATAATTACCAAGTAACGAAAGCACGTCCTGGATCTAAAGCTGCAATAGAT  
AAATTTAAGGCTGCTGCGGGTTCATTCCCAAATGCTGATTACCCTTTGGCA  
TATGTGCAGATTGATCATACACCTCTAGATATTGAAATCGTGGATGACGAG  
TTCAGAGAAGCGATTGGAAAACCTCACTTAACCTTGGCAATCGATGTTTTTC  
AGTCGGATGATTGTTGGATATTACCTATCACTAGAAGCACCAAGTACGACT  
TCAGTGGCGATGTGTATAGCATCTTGTATTTTGTCAAAAAACGTAAGTTG  
ATCGAACTAAATATTGATGCTGAATGGCAGGTGCAAGGTATTATGGACTC  
GGTGCATACAGATAATGGACCCGATTTTGAACCAATCACATCAGTAAAGC  
TTGCCTAAAATATGGGATTCATTGGGAATATAGACCAATTGGTGGGGCGA  
GATTTGGCGGTCATATTGAACGTATGCTTGGTATTGTCAATCTTGAATGC  
ATGTGCTGGATGGTACAACTTTTTCAAATGTGCAGCAGCGAGGAACTTAT  
GATTCCGCTAAACAAGCCTGTATGACATTAAGGAACTTGAATACTATATC  
GTTTATTGGATTACTAAAGTTTATCATCAGAAGAAGCATTACAGCTTTAGGAA  
CATCACCTATTGTTAAATGGGAAGAAGGTGTTTGGGGAACGAAGACGACA  
GCAGGAACAGGTTTGAAGAACGTGTATCAGATGAAGATACCTTGTTTATT  
GATTTTCTACCTGAATTTGAAGCGACCATTACAGGTACAGGGGTGCAGAA  
AGATAACTTATTCTATTTTGCAGACTGTTTAAGGCAATGGGTTAATTCTATT  
GATCCAGACGACAATAATCGAAAGCGCAAAAAGAAAATTCTTATTTAAGCGT  
GATCCGAGGGATATTTACAGATTTGGTTTTATGAGCCATTTTCTAATACC  
TATTTTAAAGTACCCACTGCAAAGCGAGAGATACCACCGATTAGCTTATTT  
GAATATAGACAGGTACAGAACTATCTCAAGAATGGGCGTCAGGATGTTCA  
GAATCAGGATGAGATTTACAAGGCGATTTTACATCTACGTGAGCAGCTTAA  
TCAGGCTCGAAGCTTGACTCGAAAGCAACGTGCGTCAAACCAAAGAAAA  
AGGAAAATGAAAAGCCATTACTCAGCTATCCGAACAGAATCAGTCTAAAA

*tnsB\_1*

hypothetical  
protein

L6, L9,  
L10

L

Mu transposase, C-terminal

AGGCTGTAGTTTCTGAAAGCCTTCAGACAAGTGATGATTTGTGGAGTACTC  
CTTTAACTGCATTTGATGATTTAAGGTGA  
ATGATTGAATCTAATGCTGTCAATATCGATCGTAGTCGTATCATTCTAAAAC  
CCAATGTGGTTGTCGGTTATGAGGGGCAACCCTATAAAATTGTGAATGTTT  
TAAATGCCAATGACATTGTTATATCAAGTCTTGATTCCGGTACGTAGTCTAC  
AGGTCAATGCTAGAAGTTTGACCATTTTTAATGGGGGAAATACGCTAACTG  
AGCGTTTGAATAAGGGTGATCAGGATATTAGTAATGAAGCTTGGCAGATT  
GCTTTACAACGTTATGAGATTATTAAGCCTTTGATTGAGTATTCAACGACT  
GAACTGGTCGAAAATAGGGCGAATGAATATGATGTGAATCGCTCAACATT  
GTGGAAATGGCTTAAAGATTATCGGGAAAATAATTCTCTAATGGCATTGAT  
TCCCCAAAAACGAGGTTGGACAACGAAAATCAAGGTTGTCACCTCAAG  
TGAGCAATATCATTAAACAAGCTATCAATGATGAATTTTGAATGCGAAGA  
AACCCAGTATTTCCAAAACGATTGAAATTGAAAAGCAGAGTGTCTCGGC  
TTCAGCTTGAAGCACCGCATGAAAACCTATTCGTAGAAGAATCGAGGCTT  
TAAATGATTACCAAGTAACGAAAGCACGTCTTGGATCTAAAGCTGCAATAG  
ATAAATTTAAGGCTGCTGCTGGTTCATTTCCAAATGCTGATTACCCTTTGG  
CATATGTGCAGATTGATCATAACCTCTAGATATTGAAATCGTGGATGACG  
AGTTTAGAGAAGCGATTGGAAAACCTCATTTAACCTTGGCAATCGATGTTT  
TCAGTCGGATGATCGTAGGGTATTACCTATCACTAGAAGCGCCAAGTACG  
ACTTCAGTGGCGATGTGTATCGCATCTTGTATTTTGTCAAAAAACGTAAG  
TTGATCGAACTCGATATTGATGCTGAATGGCAGGTGCAAGGGATTATGGA  
CTCGGTGCATACAGATAATGGCCCCGATTTTAGAACCAATCACATCAGTAA  
AGCTTGTCTAAAGTATGGGATTCATTGGGAATACCGACCAATTGGTGGGG  
CAAGATTTGGCGGTCATATCGAGCGTATGCTTGGTATCGTCAATCTTGAAA  
TGCATGTCTTGGATGGTACAACCTTTTTCAAATGTACAGCAGCGTGGGACTT  
ATGATTCCGCTAAACAAGCCTGTATGACATTAAGAGCTTGAATACTATA  
TCGTGTATTGGATTACTAAAGTTTATCACCAGAAGAAACATTCCGCTTTAG  
GAACATCCCCAATCGTTAAATGGGAAGAAGGTGTTTGGGGGACGAAGAC  
GACAGCAGGTACAGGTTTGAAGAACGTGTATCAGATGAAGATACCTTGT  
TTATTGATTTTCTACCTGAATTTGAAGCGACTATTCAGCGTACAGGGGTGC  
AAAAAGATAACTTATTCTATTTTGCCGACTGTTTAAGACAATGGGTAAATTC  
TATTGATCCAGAGGACAATAATCGAAAGCGCAAAAGAAAATTCTTGTTTAA  
ACGTGATCCGAGGGATATTTACAGATTTGGTTTTATGAGCCATATTCTAA

*tnsB\_2*

Transposon  
Tn7  
transposition  
protein  
TnsB

L8, L10

L

Mu transposase, C-terminal

TACCTATTTTAAAGTACCTACCGCAAAGCGAGAGATACCACCGATTAGCTT  
ATTTGAATATAAGCAGGTTTCAGAACTATCTCAAAAGTGAACGTCAGGATGT  
TCAGAATCAGGATGAGATTTACAAGGCGATTTTTGCATCTACGTGATCAACT  
TAATCAGGCTAGAAGCTTGACTCGAAAGCAACGTCGCTCAAACCAAAGAA  
AAAAGGAAAATGCAAAAGCCATTACTCAGCTTTCCGAACAGAATCAGTCTA  
AAAAGGCTGTAGTTTCTGAAAGTCTTCAGACAAGTGATGATTTGTGGAGTA  
CTCCTTTAACTGCATTTGACGATTTAAGGTGA  
GTGAGCAATATCATTAAACAAGCTATCAATGATGAATATTTGAATGCGAAG  
AAACCTAGTATTTCCAAAACGATTGAAATTGTAAAAGCAGAGTGTTACCGG  
CTTCAGCTTGAAGCACCACATGAAAACCTCTATTCGTAGAGAATCGAGGCT  
TTAAATAATTACCAAGTAACGAAAGCACGTCTTGGATCTAAAGCTGCAATA  
GATAAATTTAAGGCTGCTGCGGGTTCATCCCAAATGCTGATTACCCTTTG  
GCATATGTGCAGATTGATCATAACCTCTAGATATTGAAATCGTGGATGAC  
GAGTTCAGAGAAGCGATTGGAAAACCTCACTTAACCTTGGCAATCGATGT  
TTTCAGTCGGATGATTGTTGGATATTACCTATCACTAGAAGCACCAAGTAC  
GACTTCAGTGGCGATGTGTATAGCATCTTGTATTTTGTCAAAAAACGTAA  
GTTGATCGAACTAAATATTGATGCTGAATGGCAGGTGCGAAGGTATTATGGA  
CTCGGTGCATACAGATAATGGACCCGATTTTAGAACCAATCACATCAGTAA  
AGCTTGCCTAAAATATGGGATTCATTGGGAATATAGACCAATTGGTGGGG  
CGAGATTTGGCGGTCATATTGAACGTATGCTTGGTATTGTCAATCTTGA  
TGCATGTGCTGGATGGTACAACCTTTTCAAATGTGCAGCAGCGAGGAACT  
TATGATTCCGCTAAACAAGCCTGTATGACATTAAGGAACTTGAATACTAT  
ATCGTTTATTGGATTACTAAAGTTTATCATCAGAAGAAGCATTGAGCTTTAG  
GAACATCACCTATTGTTAAATGGGAAGAAGGTGTTTGGGGAACGAAGACG  
ACAGCAGGAACAGGTTTGAAGAACGTGTATCAGATGAAGATACCTTGTTT  
ATTGATTTTCTACCTGAATTTGAAGCGACCATTGAGCGTACAGGGGTGCA  
GAAAGATAACTTATTCTATTTTGCAGACTGTTTAAGGCAATGGGTTAATTCT  
ATTGATCCAGACGACAATAATCGAAAGCGCAAAGAAAATTCTTATTTAAG  
CGTGATCCGAGGGATATTTACAGATTTGGTTTTATGAGCCATTTTCTAAT  
ACCTATTTTAAAGTACCCACTGCAAAGCGAGAGATACCACCGATTAGCTTA  
TTTGAATATAGACAGGTACAGAACTATCTCAAGAATGGGCGTCAGGATGTT  
CAGAATCAGGATGAGATTTACAAGGCGATTTTACATCTACGTGAGCAGCTT  
AATCAGGCTCGAAGCTTGACTCGAAAGCAACGTCGCTCAAACCAAAGAAA

*tuf1\_1*

Elonga  
tion  
factor  
Tu  
A2, A3,  
A14

J

This protein promotes the GTP-  
dependent binding of aminoacyl-tRNA to  
the A-site of ribosomes during protein  
biosynthesis

AAAGGAAAATGAAAAAGCCATTACTCAGCTATCCGAACAGAATCAGTCTAA  
AAAGGCTGTAGTTTCTGAAAGCCTTCAGACAAGTGATGATTTGTGGAGTAC  
TCCTTTAACTGCATTTGATGATTTAAGGTGA  
ATGGCTAAAGCCAAGTTTGAACGTAATAAACCACACGTAAACGTGGGTAC  
AATCGGTCACGTTGACCATGGTAAAACAACTTTAACTGCTGCGATTGCAAC  
AATTTGTGCAAAAACCTTACGGCGGTGAAGCGAAAGATTACTCACAAATCGA  
CTCAGCACCTGAAGAAAAAGCACGTGGTATTACAATTAATACATCACACGT  
AGAATACGATTCTCCAACCTCGTCACTACGCACACGTTGACTGCCCAGGCC  
ACGCCGACTACGTTAAAAACATGATCACTGGTGCTGCTCAGATGGACGGC  
GCGATCCTTGTATGTGCTGCAACTGACGGTCCAATGCCACAAAACCTCGTGA  
GCACATCCTTCTTTCTCGTCAGGTAGGTGTACCTTACATCATCGTATTCTT  
AAACAAATGCGACCTTGTGGATGACGAAGAATTACTTGAATTAGTAGAAAT  
GGAAGTACGTGAACTTCTTTCTACTTATGACTTCCCAGGTGATGACACTCC  
AGTAATCCGTGGTTCAGCTCTTGCAGCGCTTAACGGTGAAGCTGGTCCCTT  
ACGGTGAAGAATCAGTTCTTGCTCTTGTAGCAGCACTTGACTCTTATATCC  
CAGAGCCAGAGCGTGCAATCGACAAAGCATTCTTGATGCCAATCGAAGAC  
GTATTCTCAATTTCTGGTCGTGGTACAGTAGTAACAGGCCGTGTTGAAGCT  
GGTATCATCAAAGTTGGTGAAGAAGTAGAGATCGTTGGTATTAAGATACA  
GTTAAAACAACCTGTAACCTGGCGTAGAAATGTTCCGTAAACTTCTTGACGAA  
GGCCGTGCAGGTGAGAACTGTGGTATCTTACTTCGTGGTACTAAGCGTGA  
AGAAGTACAACGTGGTCAAGTACTTGCTAAACCAGGTACAATCAAGCCGC  
ACACTAAATTCGACGCAGAAGTATACGTACTTTCTAAAGAAGAAGGTGGTC  
GTCACACTCCATTCTTAAATGGTTACCGTCCACAGTTCTACTTCCGTACAA  
CTGACGTAACCTGGTGCGATCCAGTTGAAAGAAGGCGTTGAAATGGTAATG  
CCAGGTGACAACGTTGAAATGTCAGTAGAATTAATCCACCCAATCGCAAT  
GGACCCAGGTCTACGTTTTGCGATCCGTGAAGGTGGTCTGACTGTAGGTG  
CTGGTGTGTTGCTAAAGTAACTGCATAA

*tuf1\_2*

Elonga  
tion  
factor  
Tu  
A2, A3,  
A14

J

This protein promotes the GTP-  
dependent binding of aminoacyl-tRNA to  
the A-site of ribosomes during protein  
biosynthesis

ATGGCTAAAGCCAAGTTTGAACGTAATAAACCACACGTAAACGTGGGTAC  
AATCGGTCACGTTGACCATGGTAAAACAACTTTAACTGCTGCGATTGCAAC  
AATTTGTGCAAAAACCTTACGGCGGTGAAGCGAAAGATTACTCACAAATCGA  
CTCAGCACCTGAAGAAAAAGCACGTGGTATTACAATTAATACATCACACGT  
AGAATACGATTCTCCAACCTCGTCACTACGCACACGTTGACTGCCCAGGCC  
ACGCCGACTACGTTAAAAACATGATCACTGGTGCTGCTCAGATGGACGGC

GCGATCCTTGATGTGCTGCAACTGACGGTCCAATGCCACAACTCGTGA  
GCACATCCTTCTTTCTCGTCAGGTAGGTGTACCTTACATCATCGTATTCTT  
AAACAAATGCGACCTTGTGGATGACGAAGAATTACTTGAATTAGTAGAAAT  
GGAAGTACGTGAACTTCTTTCTACTTATGACTTCCCAGGTGATGACTCC  
AGTAATCCGTGGTTCAGCTCTTGCAGCGCTTAACGGTGAAGCTGGTCCTT  
ACGGTGAAGAATCAGTTCTTGCTCTTGTAGCAGCACTTGACTIONTACATCC  
CAGAGCCAGAGCGTGCAATCGACAAAGCATTCTTGATGCCAATCGAAGAC  
GTATTCTCAATTTCTGGTCGTGGTACAGTAGTAACAGGCCGTGTTGAAGCT  
GGTATCATCAAAGTTGGTGAAGAAGTAGAGATCGTTGGTATTAAGATACA  
GTTAAAACAACCTGTAACGGCGTAGAAATGTTCCGTAACCTTCTTGACGAA  
GGCCGTGCAGGTGAGAACTGTGGTATCTTACTTCGTGGTACTAAGCGTGA  
AGAAGTACAACGTGGTCAAGTACTTGCTAAACCAGGTACAATCAAGCCGC  
ACACTAAATTCGACGCAGAAGTATACGTACTTTCTAAAGAAGAAGGTGGTC  
GTCACACTCCATTCTTAAATGGTTACCGTCCACAGTTCTACTTCCGTACAA  
CTGACGTAACCTGGTGCATCCAGTTGAAAGAAGGCGTTGAAATGGTAATG  
CCAGGTGACAACGTTGAAATGTCAGTAGAATTAATCCACCCAATCGCAAT  
GGACCCAGGTCTACGTTTTGCGATCCGTGAGGGTGGTCGTACTIONTGTAGGT  
GCTGGTGTGTTGCTAAAGTAACTGCATAA

|               |                        |    |   |                                                                                                                          |                                                                                                                            |
|---------------|------------------------|----|---|--------------------------------------------------------------------------------------------------------------------------|----------------------------------------------------------------------------------------------------------------------------|
| <i>tufB_1</i> | Elongation factor Tu 2 | A1 | J | This protein promotes the GTP-dependent binding of aminoacyl-tRNA to the A-site of ribosomes during protein biosynthesis | ATGTCAGTAGAATTAATCCACCCAATCGCAATGGACCCAGGTCTACGTTTT<br>GCGATCCGTGAAGGTGGTCGTACTIONTGTAGGTGCTGGTGTGTTGCTAAAGT<br>AACTGCATAA |
| <i>tufB_2</i> | Elongation factor Tu 2 | A1 | J | This protein promotes the GTP-dependent binding of aminoacyl-tRNA to the A-site of ribosomes during protein biosynthesis | ATGTCAGTAGAATTAATCCACCCAATCGCAATGGACCCAGGTCTACGTTTT<br>GCGATCCGTGAGGGTGGTCGTACTIONTGTAGGTGCTGGTGTGTTGCTAAAGT<br>AACTGCATAA |

---

Figure S1 Distribution of the antibiotic resistance genes and virulence genes. The blue and white colour represented presence and absence of the gene.

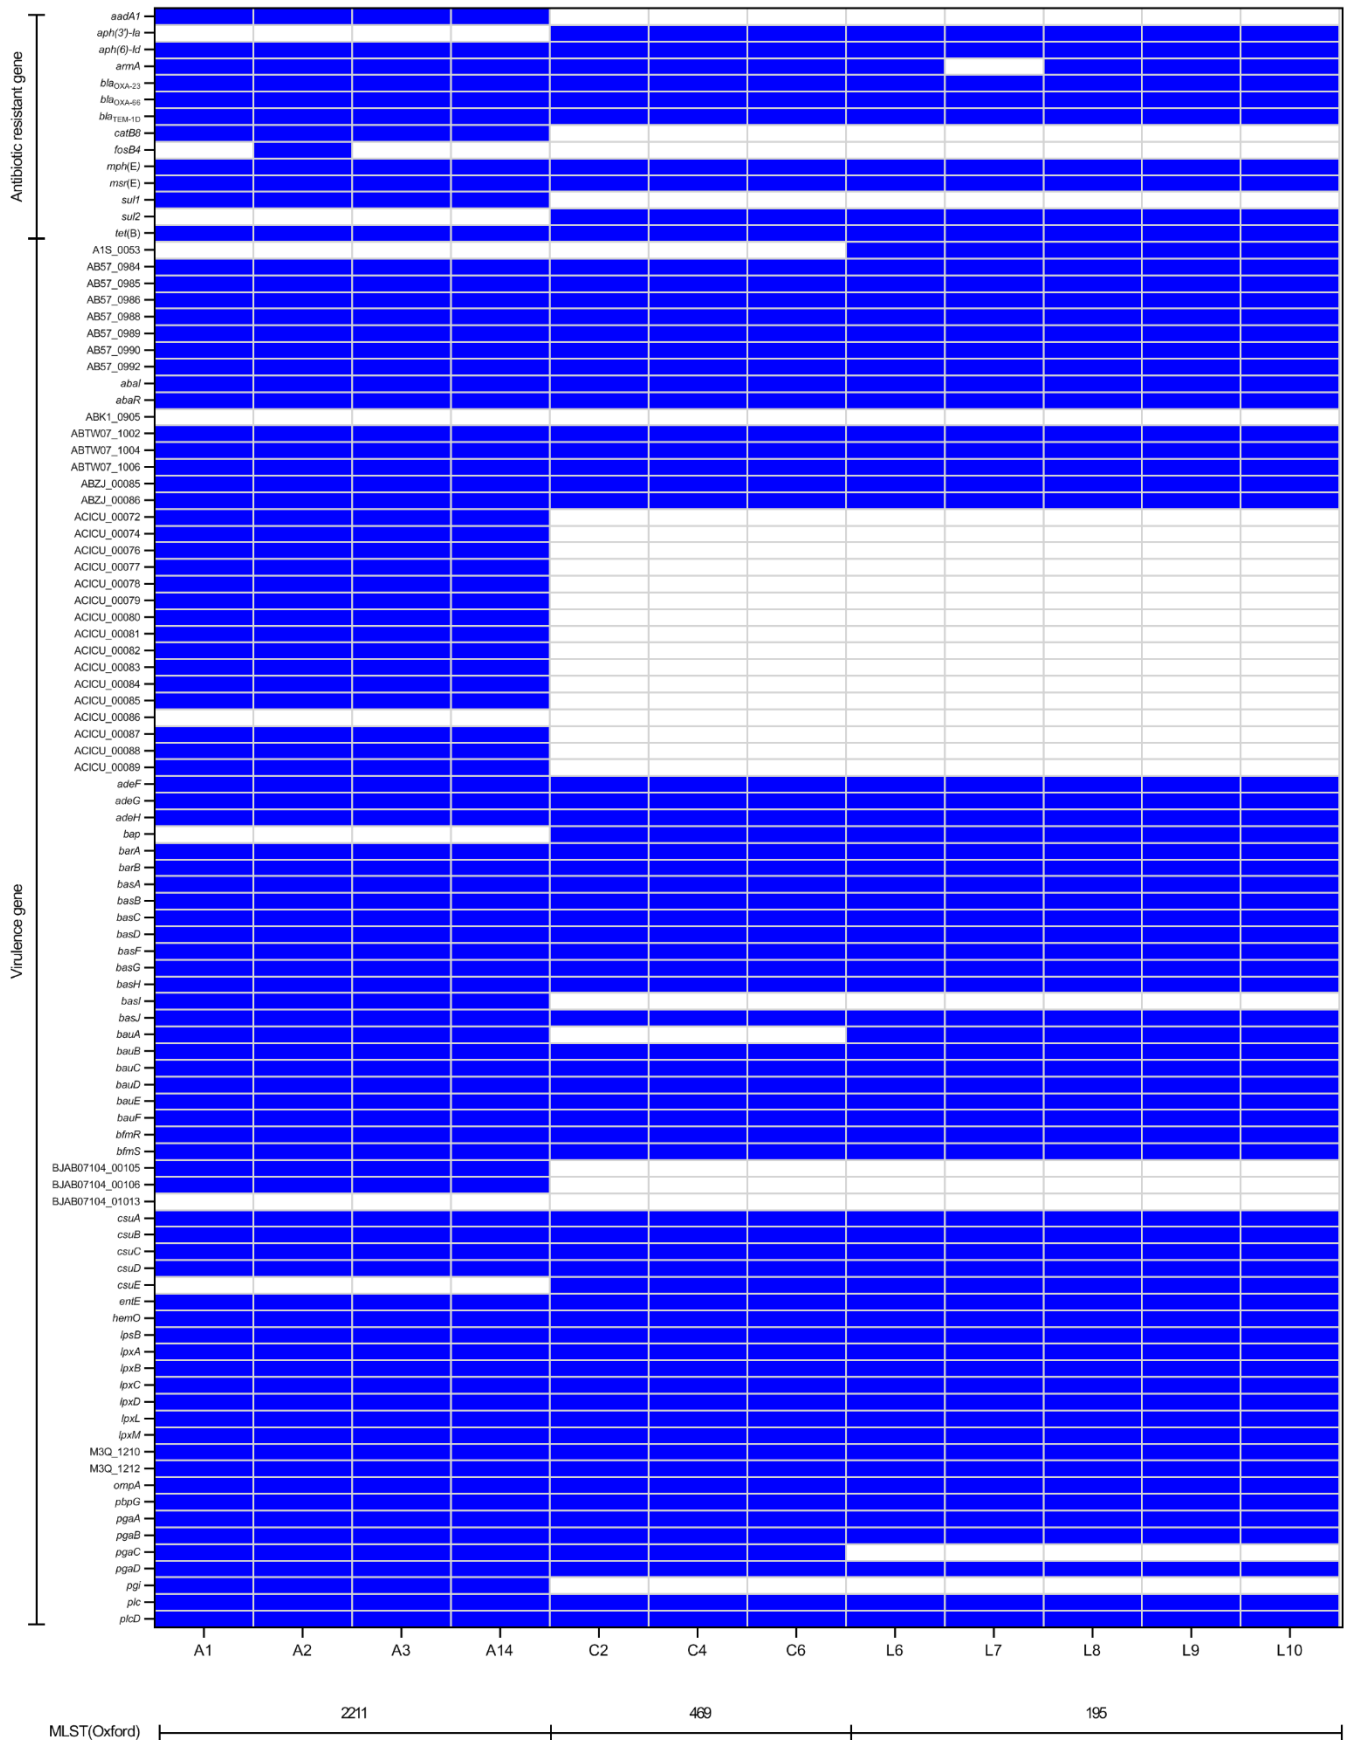

Supplement: Supplementary file 1 [file get_supplementary_file.php]
